# Supplementary material
Source: PubMed Central journal article supplement (PMC4979225)
Supplement: supp_JCO.2014.55.4634_Data_Supplement_JCO.2014.55.4634.pdf [file supp_JCO.2014.55.4634_Data_Supplement_JCO.2014.55.4634.pdf]

**Efficacy of Skin-Directed Therapy for Cutaneous Metastases from Advanced Cancer: A Meta-Analysis**

**Spratt, et al**

*Appendix A: Search Term Strategy*

(surgery OR surgical OR excision OR excised OR "General Surgery"[Mesh] OR "Surgical Procedures, Operative"[Mesh] OR topical OR "Administration, Topical"[Mesh] OR intralesional OR "Infusions, Intralesional"[Mesh] OR "Injections, Intralesional"[Mesh] OR photodynamic OR "Photochemotherapy"[Mesh] OR electrochemotherapy OR "Electrochemotherapy"[Mesh] OR radiation OR "Radiation"[Mesh] OR radiotherapy OR "Radiotherapy"[Mesh] OR brachytherapy)  
AND  
("cutaneous metastasis" OR "cutaneous metastases" OR "skin metastases" OR "skin metastasis" OR "dermal metastases" OR "dermal metastasis" OR ("Neoplasm Metastasis"[Mesh] AND "Skin"[Mesh]))

## *Appendix B: Stage 1 Study Selection*

### Title and Abstract Exclusion Criteria

1. If any of the below criteria were met, then the record was excluded from further review. Note, most articles excluded met multiple exclusion criteria, but only one criterion was coded.
  1. Entirely off topic
    - i. Common examples include: Study did not involve cancer patients (i.e. back pain), no therapeutic efficacy discussed/delivered (incidence rates, cost, epidemiology), prognostic modeling, genomic/proteomic studies, cancer prevention studies, imaging and/or diagnostic studies (i.e., positron emission tomography or sentinel lymph node biopsy studies), or histopathologic marker studies.
  2. Primary tumor
    - i. Study was on primary tumors, not metastases.
    - ii. Primary cutaneous tumors (i.e., basal cell, squamous cell, merkel cell, or melanoma) were also excluded. Note, cutaneous metastases from a primary skin tumor were not excluded.
    - iii. Hematologic malignancies, regardless of cutaneous involvement, were excluded.
  3. Assessment of a non-local therapy
    - i. Investigation of a systemic therapy (i.e., chemotherapy or biological therapy) or use of non-intralesional vaccines were excluded.
  4. Non-cutaneous metastasis
    - i. Investigated non-cutaneous metastatic disease (i.e., lymph node, liver, brain, or other visceral metastases) were excluded.
  5. Did not provide unique patient data
    - i. Review article, commentary, guideline, summary, editorial, etc. were excluded.
  6. Case report of 1 patient

- i. Any case report of only 1 patient was excluded.
7. Non-human
- i. Animal or cell line studies were excluded.
8. Non-English
- i. Studies that were not filtered by the initial language filter were excluded if not in the English language.

**Stage 1: Records Excluded and Reason for Exclusion**

| <b>Author</b>                                                                                                                                                    | <b>Year</b> | <b>Reason for Exclusion<sup>a</sup></b> |
|------------------------------------------------------------------------------------------------------------------------------------------------------------------|-------------|-----------------------------------------|
| N. B. Atkin                                                                                                                                                      | 1971        | Case report of 1 patient                |
| I. M. Ariel                                                                                                                                                      | 1975        | Case report of 1 patient                |
| L. Rogow, M. Rotman, K. Roussis                                                                                                                                  | 1975        | Case report of 1 patient                |
| M. M. Kligerman, G. West, J. F. Dicello, C. J. Sternhagen, J. E. Barnes, R. K. Loeffler, F. Dobrowolski, J. N. Bradbury, T. F. Lane, D. F. Petersen, E. A. Knapp | 1976        | Case report of 1 patient                |
| L. Olmos, P. Laugier                                                                                                                                             | 1977        | Case report of 1 patient                |
| N. Pervaiz, M. J. Fellner, J. E. Davis                                                                                                                           | 1978        | Case report of 1 patient                |
| T. F. Warner, I. S. Seo, J. E. Bennett                                                                                                                           | 1980        | Case report of 1 patient                |
| S. M. Crain, A. M. Choudhury                                                                                                                                     | 1980        | Case report of 1 patient                |
| S. W. Unger, H. J. Wanebo, P. H. Cooper                                                                                                                          | 1981        | Case report of 1 patient                |
| J. J. Turner, L. Maxwell, G. A. Bursle                                                                                                                           | 1982        | Case report of 1 patient                |
| E. C. Elliott, S. McKinney, H. Banks, R. M. Fulks                                                                                                                | 1983        | Case report of 1 patient                |
| J. L. Peterson, S. L. McMarlin                                                                                                                                   | 1983        | Case report of 1 patient                |
| J. L. Fox, B. Berman, P. G. Prioleau                                                                                                                             | 1983        | Case report of 1 patient                |
| G. Bevilacqua, S. Mariotti, M. Castagna, C. Marcocci, G. C. Di Coscio, E. Martino                                                                                | 1984        | Case report of 1 patient                |
| H. Ito, A. Kubo, N. Shigematsu, S. Hashimoto                                                                                                                     | 1984        | Case report of 1 patient                |
| J. W. Buecker, J. L. Ratz                                                                                                                                        | 1984        | Case report of 1 patient                |
| K. T. K. Chen                                                                                                                                                    | 1984        | Case report of 1 patient                |
| K. Dabski, H. Milgrom, H. L. Stoll, Jr.                                                                                                                          | 1985        | Case report of 1 patient                |
| B. M. Schultz, R. A. Schwartz                                                                                                                                    | 1985        | Case report of 1 patient                |
| P. T. Valente, B. F. Atkinson, D. Guerry                                                                                                                         | 1985        | Case report of 1 patient                |
| D. J. Grenier, R. P. Kaplan                                                                                                                                      | 1985        | Case report of 1 patient                |
| S. Tharakaram, S. S. Rajendran, S. Premalatha                                                                                                                    | 1985        | Case report of 1 patient                |
| H. Yokoyama, H. Ono, K. Mori                                                                                                                                     | 1985        | Case report of 1 patient                |
| D. L. Sherr, K. S. Fountain, R. E. Kalb                                                                                                                          | 1986        | Case report of 1 patient                |
| R. M. White, J. W. Patterson                                                                                                                                     | 1986        | Case report of 1 patient                |
| M. F. Avril, A. Mathieu, C. Kalifa, C. Caillou                                                                                                                   | 1986        | Case report of 1 patient                |
| H. P. Horny, M. R. Parwaresch, E. Kaiserling, K. Muller, M. Olbermann, K. Mainzer, K. Lennert                                                                    | 1986        | Case report of 1 patient                |
| V. Karabela-Bouropoulou, F. Patra-Malli, N. Agnantis                                                                                                             | 1986        | Case report of 1 patient                |
| J. J. Palmerola, D. A. Dulabon, Z. J. Chorazy                                                                                                                    | 1987        | Case report of 1 patient                |
| B. Patsner, W. J. Mann, J. Chumas, M. Loesch                                                                                                                     | 1988        | Case report of 1 patient                |
| W. D. Kniffin, Jr., S. K. Spencer, V. A. Memoli, P. J. LeMarbre                                                                                                  | 1988        | Case report of 1 patient                |
| S. Saracco, C. Abramowsky, S. Taylor, R. A. Silverman, B. W. Berman                                                                                              | 1988        | Case report of 1 patient                |
| S. L. Matarasso, T. Rosen                                                                                                                                        | 1988        | Case report of 1 patient                |

|                                                                                                              |      |                          |
|--------------------------------------------------------------------------------------------------------------|------|--------------------------|
| E. Bertani, M. Tamborini, S. Veraldi                                                                         | 1988 | Case report of 1 patient |
| S. Veraldi, A. Cantu Ii, F. Sala, R. Schianchi, G. Gasparini                                                 | 1988 | Case report of 1 patient |
| S. Fujiwara, H. Ichikawa, E. Matsunaga, H. Shinkai, S. Takayasu, K. Wada, H. Sekine                          | 1989 | Case report of 1 patient |
| C. R. Shea, M. J. Imber, T. G. Cropley, A. B. Cosimi, A. J. Sober                                            | 1989 | Case report of 1 patient |
| C. Bisgaard, A. S. Jensen                                                                                    | 1989 | Case report of 1 patient |
| E. Berti, R. Gianotti, E. Alessi                                                                             | 1989 | Case report of 1 patient |
| M. Santala, K. Syrjanen, S. Saarikoski                                                                       | 1989 | Case report of 1 patient |
| M. Gray                                                                                                      | 1989 | Case report of 1 patient |
| A. E. Seyfer, D. S. Walsh, G. M. Graeber, I. N. Nuno, A. H. Eliasson                                         | 1989 | Case report of 1 patient |
| L. Cerroni, H. P. Soyer, J. Smolle, H. Kerl                                                                  | 1990 | Case report of 1 patient |
| J. Itoh, K. Usui, M. Itoh, Y. Hashizume                                                                      | 1990 | Case report of 1 patient |
| E. A. Tianco, A. T. Medina-Lavadia, N. L. Atienza, G. T. Gutierrez, A. H. Villalon                           | 1990 | Case report of 1 patient |
| A. Velez, C. Fuente, I. Belinchon, N. Martin, V. Furio, J. M. G. Ruiz-de Morales, E. Sanchez Yus, A. Robledo | 1990 | Case report of 1 patient |
| M. Miyashita, M. Honjo, H. Suzuki, H. Yamagami, A. Shioda, Y. Arakawa, Y. Matsuo                             | 1991 | Case report of 1 patient |
| L. Bondeson, A. G. Bondeson, N. W. Thompson                                                                  | 1991 | Case report of 1 patient |
| S. Marschall, S. Welykyj, R. Gradini, A. Eng                                                                 | 1991 | Case report of 1 patient |
| L. Requena, M. Sanchez, A. Aguilar, E. S. Yus                                                                | 1991 | Case report of 1 patient |
| T. Haruki, S. Takahashi, M. Morohashi, T. Maruyama, M. Ida                                                   | 1991 | Case report of 1 patient |
| G. W. Elgart, J. W. Patterson, R. Taylor                                                                     | 1991 | Case report of 1 patient |
| K. Konomi, S. Imayama, S. Nagae, R. Terasaka, K. Chijiwa, Y. Yashima                                         | 1992 | Case report of 1 patient |
| T. E. Knight, A. S. Woo Jr, J. Matsuura Blaisdell                                                            | 1992 | Case report of 1 patient |
| M. A. Nigro, G. Chierigato, L. Castellani                                                                    | 1992 | Case report of 1 patient |
| B. R. Smoller, V. Narurkar                                                                                   | 1992 | Case report of 1 patient |
| M. Margarida Dias, C. Moura, A. Afonso, M. H. Lacerda                                                        | 1992 | Case report of 1 patient |
| K. Sweldens, H. Degreef, R. Sciot, B. Van Damme, C. Peeters                                                  | 1992 | Case report of 1 patient |
| B. Patsner, M. Damien                                                                                        | 1992 | Case report of 1 patient |
| P. Caron, A. Moreau-Cabarrot, B. Gorguet, J. Bazex                                                           | 1993 | Case report of 1 patient |
| S. A. Sgambati, G. H. Barrows                                                                                | 1993 | Case report of 1 patient |
| M. F. Fogaca, B. J. Fedorciw, S. R. Tahan, R. Johnson, M. Federman                                           | 1993 | Case report of 1 patient |
| J. J. Espinos, V. Garcia-Patos, X. M. Guiu, E. Delgado                                                       | 1993 | Case report of 1 patient |
| J. S. Conejo-Mir, F. Camacho, J. J. Rios, R. Gonzalez-Campora                                                | 1993 | Case report of 1 patient |
| G. T. Nahass, C. J. Otrakji, E. Gould                                                                        | 1993 | Case report of 1 patient |
| N. Eide, A. Foerster                                                                                         | 1993 | Case report of 1 patient |
| K. Iwase, H. Takenaka, S. Oshima, K. Kurozumi, Y. Nishimura, K. Yoshidome, T. Tanaka                         | 1993 | Case report of 1 patient |
| A. Zerbi, P. De Nardi, M. Braga, F. Radice, M. Sironi, V. Di Carlo                                           | 1993 | Case report of 1 patient |
| J. C. Alcolado, K. Ray, M. Baxter, C. W. Edwards, P. M. Dodson                                               | 1993 | Case report of 1 patient |
| J. M. Azana, R. F. De Misa, M. I. Gomez, J. F. Del Hoyo, A. Ledo                                             | 1993 | Case report of 1 patient |
| C. Peramezza, A. Cellini, P. Berardi, S. Benvenuti, A. Offidanti                                             | 1993 | Case report of 1 patient |
| A. G. Hayes, T. M. Chesney                                                                                   | 1993 | Case report of 1 patient |
| H. Makino, K. Naito, A. Tsuruta, K. Kan, S. Toda, N. Yoshimura, Y. Ohmori, T. Oka                            | 1993 | Case report of 1 patient |
| Y. Takeuchi, K. Nakahara, Y. Fujii, A. Matsumura, M. Minami, H. Matsuda                                      | 1993 | Case report of 1 patient |
| Y. A. Kim, I. Thomas                                                                                         | 1993 | Case report of 1 patient |
| N. Toyota, H. Asaga, M. Hirokawa, H. Iizuka                                                                  | 1994 | Case report of 1 patient |
| P. Traiman, L. A. de Luca, C. E. Bacchi                                                                      | 1994 | Case report of 1 patient |
| G. Rubini, F. Lauriero, D. Rubini, A. D'Addabbo                                                              | 1994 | Case report of 1 patient |
| B. Jones, B. C. Ghosh, H. G. Skelton                                                                         | 1994 | Case report of 1 patient |
| S. Taniguchi, T. Hisa, T. Hamada                                                                             | 1994 | Case report of 1 patient |
| J. C. Williams, J. A. Heaney                                                                                 | 1994 | Case report of 1 patient |

|                                                                                                |      |                          |
|------------------------------------------------------------------------------------------------|------|--------------------------|
| S. Ichioka, A. Yamada                                                                          | 1994 | Case report of 1 patient |
| U. Schmidt, K. A. Metz, M. Schrader, L. D. Leder                                               | 1994 | Case report of 1 patient |
| R. J. Calvert, C. M. Quinn                                                                     | 1994 | Case report of 1 patient |
| G. Nazzari, F. Drago, M. Malatto, F. Crovato                                                   | 1994 | Case report of 1 patient |
| B. Kruslin, V. Separovic, Z. Krajina, F. Knezevic, D. Markov, Z. Danilovic, N. Nola            | 1994 | Case report of 1 patient |
| H. Yanagawa, Y. Hashimoto, H. Bando, Y. Takishita, T. Nagano                                   | 1994 | Case report of 1 patient |
| R. Segal, N. S. Penneys, G. Nahass                                                             | 1994 | Case report of 1 patient |
| Y. Taniguchi, H. Ojimi, H. Takagishi, S. Tajiri, Y. Setu, K. Ogala, S. Mandokoro, R. Kamishiro | 1994 | Case report of 1 patient |
| N. C. Gleeson, M. S. Hoffman, D. Cavanagh                                                      | 1994 | Case report of 1 patient |
| V. Stolla, D. Rossi, F. Bladou, C. Rattier, D. Ayuso, G. Serment                               | 1994 | Case report of 1 patient |
| H. Demiroglu, O. I. Ozcebe, Y. Akcan, O. Ozdemir, I. Haznedaroglu, S. Dundar                   | 1994 | Case report of 1 patient |
| P. H. Navarro, F. P. Bravo, G. G. Beltran                                                      | 1995 | Case report of 1 patient |
| J. Mizushima, K. Ohara                                                                         | 1995 | Case report of 1 patient |
| D. H. Tobias, H. O. Smith, J. G. Jones, P. Anderson, C. D. Runowicz, G. L. Goldberg            | 1995 | Case report of 1 patient |
| C. H. Bangma, W. J. Kirkels, S. Chadha, F. H. Schroder                                         | 1995 | Case report of 1 patient |
| A. M. Cesinaro, A. Maiorana, G. Annessi, G. Collina                                            | 1995 | Case report of 1 patient |
| H. Ogi, H. Kiryu, Y. Hori, M. Fukui                                                            | 1995 | Case report of 1 patient |
| A. Maestri, P. Malacarne, A. Santini                                                           | 1995 | Case report of 1 patient |
| P. R. Copas, C. O. Spann, W. W. Thoms, I. R. Horowitz                                          | 1995 | Case report of 1 patient |
| B. Bellman, N. A. Gregory, D. Silvers, K. S. Fountain                                          | 1995 | Case report of 1 patient |
| K. Krasagakis, U. Hettmannsperger, B. Tebbe, C. Garbe                                          | 1995 | Case report of 1 patient |
| N. H. French, T. S. Williams, J. P. Callen                                                     | 1995 | Case report of 1 patient |
| J. B. Krasnoff, J. Longley, M. E. Katz, K. L. Watsky                                           | 1995 | Case report of 1 patient |
| C. Celebi, O. Latifoglu, F. Demirkan, S. Cenetoglu, K. Atabay, O. Uluoglu                      | 1995 | Case report of 1 patient |
| B. Bellman, M. Grossman, J. Spitz                                                              | 1995 | Case report of 1 patient |
| S. K. Park, H. S. Jang, K. S. Kwon, T. A. Chung                                                | 1995 | Case report of 1 patient |
| J. Y. Choi, M. H. Lee, C. R. Haw                                                               | 1995 | Case report of 1 patient |
| L. Bianchi, A. Orlandi, S. Iraci, L. G. Spagnoli, G. Nini                                      | 1995 | Case report of 1 patient |
| J. H. Kim, M. H. Lee, C. R. Haw                                                                | 1995 | Case report of 1 patient |
| T. Umekawa, T. Kurita                                                                          | 1995 | Case report of 1 patient |
| K. M. Thomas, V. L. Cumberworth, J. McEwan                                                     | 1995 | Case report of 1 patient |
| P. H. Itin, S. Lautenschlager, S. A. Buechner                                                  | 1995 | Case report of 1 patient |
| A. K. Joseph, J. A. Tschen, S. A. Sekula, S. H. Sudduth                                        | 1995 | Case report of 1 patient |
| B. M. Al-Kassab, M. E. Foster                                                                  | 1995 | Case report of 1 patient |
| R. Kulkarni, W. P. Bradford                                                                    | 1995 | Case report of 1 patient |
| E. A. Bacha, W. Barber, W. Ratchford                                                           | 1996 | Case report of 1 patient |
| J. M. Debois                                                                                   | 1996 | Case report of 1 patient |
| V. N. Giardina, B. F. Morton, G. K. Potter, R. Mesa-Tejada, W. C. Waterfield                   | 1996 | Case report of 1 patient |
| C. W. Sexton, W. L. White                                                                      | 1996 | Case report of 1 patient |
| J. S. Wieselthier, W. L. White                                                                 | 1996 | Case report of 1 patient |
| J. D. K. Trager, V. G. Prieto, N. S. McNutt, R. D. Granstein, R. A. Scott                      | 1996 | Case report of 1 patient |
| D. J. Hetzel, G. J. Olt, J. I. Sorosky, R. Mortel, K. Singapuri, E. S. Podczaski               | 1996 | Case report of 1 patient |
| C. W. Ihm, S. L. Park, S. Y. Sung, I. S. Lee                                                   | 1996 | Case report of 1 patient |
| C. D. Brathwaite, R. J. Poppiti Jr                                                             | 1996 | Case report of 1 patient |
| E. M. Hartenbach, A. K. Saltzman, C. B. Zachary, J. L. Osborne, T. Okagaki, L. B. Twigg        | 1996 | Case report of 1 patient |
| W. T. Couldwell, C. B. Stillerman, D. Rice, D. Maceri, R. Sherman, T. Fukushima, D. R. Hinton  | 1996 | Case report of 1 patient |

|                                                                                                           |      |                          |
|-----------------------------------------------------------------------------------------------------------|------|--------------------------|
| M. C. Kuo, P. W. Wang, S. C. Tung, W. Y. Chien, Y. C. Lu, C. C. Lin                                       | 1996 | Case report of 1 patient |
| C. Measham, J. L. Rutgers                                                                                 | 1996 | Case report of 1 patient |
| K. Nishimura, H. Kameoka, M. Kondoh, S. Yamaguchi, A. Okuyama                                             | 1996 | Case report of 1 patient |
| A. Makris, J. R. Goepel                                                                                   | 1996 | Case report of 1 patient |
| M. M. Loureiro, V. H. Leite, J. M. Boavida, J. F. Raposo, M. M. Henriques, E. S. Limbert, L. G. Sobrinho  | 1997 | Case report of 1 patient |
| D. M. Kushner, J. R. Lurain, T. S. Fu, D. A. Fishman                                                      | 1997 | Case report of 1 patient |
| Y. Yamamura, Y. Kodera, T. Kito                                                                           | 1997 | Case report of 1 patient |
| C. L. Kauffman, B. Sina                                                                                   | 1997 | Case report of 1 patient |
| J. J. Hoorweg, B. M. Loftus, F. J. Hilgers                                                                | 1997 | Case report of 1 patient |
| P. Bhandarkar, K. M. J. Green, J. P. De Carpentier                                                        | 1997 | Case report of 1 patient |
| M. P. M. Marta, F. M. Rodriguez, E. L. Bran, R. N. Lens, E. De Eusebio y Murillo, F. S. De Paz            | 1997 | Case report of 1 patient |
| G. Micali, F. Ferrau, M. R. Nasca, D. Innocenzi, A. G. Di Stefano, D. Lembo                               | 1997 | Case report of 1 patient |
| S. Javaheri, C. Wayne Cruse, W. K. Stadelmann, D. S. Reintgen                                             | 1997 | Case report of 1 patient |
| V. G. Prieto, B. J. Kenet, M. Varghese                                                                    | 1997 | Case report of 1 patient |
| C. Lisa Kauffman, B. Sina                                                                                 | 1997 | Case report of 1 patient |
| T. Ishizawa, Y. Mitsuhashi, S. Kondo, S. Watabe                                                           | 1997 | Case report of 1 patient |
| A. Shafqat, G. E. Viehman, S. A. Myers                                                                    | 1997 | Case report of 1 patient |
| M. J. Veness, J. Sullivan                                                                                 | 1998 | Case report of 1 patient |
| M. Bardaji, F. Roset, A. Puig, J. Badal, M. J. Fernandez-Layos                                            | 1998 | Case report of 1 patient |
| B. Piura, D. Vardy, M. Meirovitz, Y. Cohen, I. Yanai-Inbar                                                | 1998 | Case report of 1 patient |
| K. Watanabe, T. Sugino, A. Saito, T. Kusakabe, T. Suzuki                                                  | 1998 | Case report of 1 patient |
| J. Cotton, D. J. Armstrong, R. Wedig, A. F. Hood                                                          | 1998 | Case report of 1 patient |
| J. Pec, L. Plank, J. Kliment, J. Luptak, E. Hajtmanova, M. Pec                                            | 1998 | Case report of 1 patient |
| E. A. Koller, J. B. Tourtelot, H. S. Pak, M. W. Cobb, J. C. Moad, E. A. Flynn                             | 1998 | Case report of 1 patient |
| S. E. Crawford, E. M. Flores-Stadler, L. Huang, X. D. Tan, M. Ranalli, Y. Mu, F. Gonzalez-Crussi          | 1998 | Case report of 1 patient |
| S. North, J. R. Mackey, J. Jensen                                                                         | 1998 | Case report of 1 patient |
| S. Saito                                                                                                  | 1998 | Case report of 1 patient |
| A. M. Khalil, M. F. Chammas, H. J. Kaspar, A. T. Shamseddine, M. Af Seoud                                 | 1998 | Case report of 1 patient |
| G. J. Pomper, R. Gianani, R. J. Johnston, M. N. Rizeq                                                     | 1998 | Case report of 1 patient |
| Y. F. Yuen, E. J. Lewis, J. T. Larson, M. S. Wilke, E. B. Rest, C. B. Zachary                             | 1998 | Case report of 1 patient |
| M. Pandey, N. C. Aryya, S. Pradhan, A. K. Asfhana, A. Gautam, V. K. Shukla                                | 1998 | Case report of 1 patient |
| G. K. Maheswari, H. A. Baboo, U. Gopal, N. M. Shah, D. B. Balar                                           | 1998 | Case report of 1 patient |
| L. Cuq-Viguiet, R. Viraben                                                                                | 1998 | Case report of 1 patient |
| E. R. Dennett, C. H. Cochrane, B. R. Parry                                                                | 1998 | Case report of 1 patient |
| A. Cabral, A. Placido, R. Mesquita-Lima, J. Limao, M. Maya, J. Almeida Ricardo                            | 1998 | Case report of 1 patient |
| J. Nakano, T. Shimizu, T. Hirota, M. Muto                                                                 | 1998 | Case report of 1 patient |
| M. Galindo-Gallego, C. Lopez-Elzaurdia, M. J. Fernandez-Acenero, G. Ais-Conde, J. J. Manzanares-Sacristan | 1998 | Case report of 1 patient |
| C. Vasconcelos, P. Xavier, A. Mota, N. Lomba, J. M. Lopes, J. Silva-Ferreira                              | 1998 | Case report of 1 patient |
| G. Sersa, M. Cemazar, Z. Rudolf, A. P. Frasz                                                              | 1999 | Case report of 1 patient |
| D. P. Mandrekas, A. M. Dimopoulos, D. Mouloupoulou, G. Papamichalis, A. G. Gougoulakis                    | 1999 | Case report of 1 patient |
| A. Florez, D. Sanchez-Aguilar, C. Peteiro, J. M. Penaranda, J. Toribio                                    | 1999 | Case report of 1 patient |
| Y. Noura, I. Kbaier, F. Attyaoui, A. Horchani                                                             | 1999 | Case report of 1 patient |
| A. Shiba, M. Hatoko, T. Okazaki, M. Kuwahara, A. Tanaka, T. Muramatsu                                     | 1999 | Case report of 1 patient |

|                                                                                                                 |      |                          |
|-----------------------------------------------------------------------------------------------------------------|------|--------------------------|
| Y. Kubota, T. Koga, J. Nakayama                                                                                 | 1999 | Case report of 1 patient |
| R. Nambi, S. Tharakaram                                                                                         | 1999 | Case report of 1 patient |
| N. Conrad, P. Leis, I. Orengo, E. E. Medrano, T. G. Hayes, S. Baer, T. Rosen                                    | 1999 | Case report of 1 patient |
| T. Inadomi, M. Tan, H. Suzuki, C. Shigematsu                                                                    | 1999 | Case report of 1 patient |
| R. L. Lal, J. K. Joffe                                                                                          | 1999 | Case report of 1 patient |
| H. Okada, J. Qing, T. Ohnishi, S. Watanabe                                                                      | 1999 | Case report of 1 patient |
| H. Furukawa, Y. Muramatsu, N. Moriyama                                                                          | 1999 | Case report of 1 patient |
| M. J. Zirwas, S. Hunt, T. F. Logan, J. L. Abernethy, M. P. Seraly                                               | 2000 | Case report of 1 patient |
| M. H. Han, G. J. Koh, J. H. Choi, K. J. Sung, J. K. Koh, K. C. Moon                                             | 2000 | Case report of 1 patient |
| C. S. Ng                                                                                                        | 2000 | Case report of 1 patient |
| H. A. Ruiz, L. H. Goldberg, T. R. Humphreys, J. B. Blacklock                                                    | 2000 | Case report of 1 patient |
| S. D. Stavrianos, N. R. McLean, C. G. Kelly, S. Fellows                                                         | 2000 | Case report of 1 patient |
| R. Y. Rubinstein, S. Baredes, J. Caputo, L. Galati, R. A. Schwartz                                              | 2000 | Case report of 1 patient |
| A. Sawa, P. Pozarowski, J. Rolinski, A. Dmoszynska, K. Gozdzkiuk, A. Surdacka, E. Korobowicz                    | 2000 | Case report of 1 patient |
| N. Uchida, Y. Tsuzuki, T. Ando, Y. Mochida, M. Yoshikawa, M. Sekihara, M. Kobayashi, M. Ide, Y. Ohno, H. Kuwano | 2000 | Case report of 1 patient |
| I. Takeyoshi, M. Yoshida, S. Ohwada, T. Yamada, A. Yanagisawa, Y. Morishita                                     | 2000 | Case report of 1 patient |
| M. Caccialanza, R. Gianotti, R. Piccinno, L. Gnechi                                                             | 2000 | Case report of 1 patient |
| G. Sersa, T. Cufer, M. Cemazar, M. Rebersek, R. Zvonimir                                                        | 2000 | Case report of 1 patient |
| K. Hayashi, T. Matsuo, M. Kurihara, M. Daikoku, G. Kitange, S. Shibata                                          | 2000 | Case report of 1 patient |
| M. Rebersek, T. Cufer, Z. Rudolf, G. Sersa                                                                      | 2000 | Case report of 1 patient |
| J. F. Val-Bernal, E. Hernandez-Nieto                                                                            | 2000 | Case report of 1 patient |
| C. Kosmas, N. A. Malamos, N. Tsavaris, M. Antonopoulos                                                          | 2000 | Case report of 1 patient |
| J. R. Kouvaris, G. A. Plataniotis, D. G. Floros, C. A. Sykiotis, S. J. Trakadas, L. J. Vlahos                   | 2000 | Case report of 1 patient |
| I. C. Freitas, I. Conchon, A. Afonso, J. Cardoso                                                                | 2000 | Case report of 1 patient |
| Y. Terada, Y. Wanibuchi, M. Noguchi, T. Mitsui                                                                  | 2000 | Case report of 1 patient |
| K. Pavithran, D. C. Doval, A. K. Dewan                                                                          | 2000 | Case report of 1 patient |
| P. S. Arunachalam, C. R. S. Ramachandra                                                                         | 2000 | Case report of 1 patient |
| S. S. Chang, Y. S. Huang, Y. Chao, A. F. Y. Li, K. H. Chi, S. H. Yen, S. S. Wang, F. Y. Chang, S. D. Lee        | 2000 | Case report of 1 patient |
| T. Miyamoto, A. Ikehara, M. Araki, T. Akaeda, M. Mihara                                                         | 2000 | Case report of 1 patient |
| J. F. Val-Bernal, M. Mayorga, B. Torio, C. Mira                                                                 | 2000 | Case report of 1 patient |
| J. W. Smit, S. Van Zelderen-Bhola, R. Merx, W. De Leeuw, H. Wessels, R. Vink, H. Morreau                        | 2001 | Case report of 1 patient |
| Y. R. Fang, Y. S. Huang, J. C. Wu, Y. Chao, S. H. Tsay, C. Y. Chan, F. Y. Chang, S. D. Lee                      | 2001 | Case report of 1 patient |
| D. Guberman, C. Reinus                                                                                          | 2001 | Case report of 1 patient |
| J. F. Val-Bernal, J. Figols, F. P. Arce, J. Sanz-Ortiz                                                          | 2001 | Case report of 1 patient |
| V. C. Mishra, S. F. Tindall                                                                                     | 2001 | Case report of 1 patient |
| A. D. Singh, J. A. Shields, C. L. Shields, T. Sato                                                              | 2001 | Case report of 1 patient |
| C. D'Aniello, C. Brandi, L. Grimaldi                                                                            | 2001 | Case report of 1 patient |
| L. Elit, H. Lukka, E. Friedman                                                                                  | 2001 | Case report of 1 patient |
| M. Otani, Y. Maeda, Y. Miyake, M. Miura, M. Kudo, Y. Ebihara                                                    | 2001 | Case report of 1 patient |
| C. Moreno, W. K. Jacyk, M. J. Judd, L. Requena                                                                  | 2001 | Case report of 1 patient |
| U. Bottoni, D. Innocenzi, T. J. Mannooranparampil, A. Richetta, M. Del Giudice, S. Calvieri                     | 2001 | Case report of 1 patient |
| Y. Hamamoto, K. Nagai, M. Ichimiya, K. Yamamoto, E. Kinoshita, M. Muto                                          | 2001 | Case report of 1 patient |
| S. Snow, D. Madjar, G. Reizner, K. E. Mac, M. Bentz                                                             | 2001 | Case report of 1 patient |
| G. K. Maheshwari, H. A. Baboo, R. Ashwathkumar, K. S. Dave, M. K. Wadhwa                                        | 2001 | Case report of 1 patient |



|                                                                                                              |      |                          |
|--------------------------------------------------------------------------------------------------------------|------|--------------------------|
| A. Dominici, G. Nesi, N. Mondaini, A. Amorosi, M. Rizzo                                                      | 2001 | Case report of 1 patient |
| M. Seishima, H. Shimizu, Z. Oyama                                                                            | 2001 | Case report of 1 patient |
| F. Mota, I. Amorim, A. Massa, S. Caspurro, C. Santos                                                         | 2001 | Case report of 1 patient |
| A. Amit, C. L. Edwards, P. Athey, A. L. Kaplan                                                               | 2001 | Case report of 1 patient |
| R. Silfen, A. Amir, A. Tobar, D. J. Hauben                                                                   | 2001 | Case report of 1 patient |
| M. H. Kagen, K. K. Ruhl, C. Aghajanian, P. L. Myskowski                                                      | 2001 | Case report of 1 patient |
| S. Y. Lee, S. E. Chang, G. Y. Bae, J. H. Choi, K. J. Sung, K. C. Moon,<br>J. K. Koh                          | 2001 | Case report of 1 patient |
| G. R. Mason, K. Micetich, G. V. Aranha                                                                       | 2001 | Case report of 1 patient |
| E. W. H. To, W. M. Tsang, P. C. W. Pang, J. H. H. Cheng, G. M. K.<br>Tse, W. S. S. Tsang                     | 2001 | Case report of 1 patient |
| T. Yoshimasu, Y. Yamamoto, K. Uede, F. Furukawa                                                              | 2001 | Case report of 1 patient |
| A. A. Ozsaran, Y. Dikmen, M. Kazandi, M. C. Terek, A. C. Kazandi, Y.<br>Erhan                                | 2002 | Case report of 1 patient |
| K. Bassioukas, A. Zioga, E. Konstantinou, J. Alexis, C. Fotika, N.<br>Agnantis, J. Hatzis                    | 2002 | Case report of 1 patient |
| D. Ribuffo, C. Alfano, P. S. Ferrazzoli, N. Scuderi                                                          | 2002 | Case report of 1 patient |
| F. Villalta M. J. Garcia, T. Sanz-Sanchez, M. Aragues, A. Blasco, J.<br>Fraga, A. Garcia-Diez                | 2002 | Case report of 1 patient |
| M. Shabahang, A. S. Livingstone                                                                              | 2002 | Case report of 1 patient |
| P. Figueroa, J. R. Lupton, T. Remington, M. Olding, R. V. Jones, L. N.<br>Sekhar, V. I. Sulica               | 2002 | Case report of 1 patient |
| N. Behtash, F. Ghaemmaghami, F. Yarandi, F. A. Ardalan, N.<br>Khanafshar                                     | 2002 | Case report of 1 patient |
| S. K. Dasmajumdar, M. Gairola, D. N. Sharma, B. K. Mohanti                                                   | 2002 | Case report of 1 patient |
| V. Navarro, D. Ramon, L. Calduch, B. Llombart, C. Monteagudo, E.<br>Jorda                                    | 2002 | Case report of 1 patient |
| C. Charalambous, C. S. Zipitis, M. Midwinter                                                                 | 2002 | Case report of 1 patient |
| K. F. Foo, M. Tao, E. H. Tan                                                                                 | 2002 | Case report of 1 patient |
| C. Gourley, H. Monaghan, G. Beattie, S. Court, C. Love, H. Gabra                                             | 2002 | Case report of 1 patient |
| R. Srinivasan, U. Kini, M. K. Babu, E. Jayaseelan, R. Pradeep                                                | 2002 | Case report of 1 patient |
| S. Khandpur, B. S. Reddy, H. Kaur                                                                            | 2002 | Case report of 1 patient |
| J. Y. Luh, E. S. Han, J. R. Simmons, R. P. Whitehead                                                         | 2002 | Case report of 1 patient |
| J. Setterfield, R. Sciot, M. Debiec-Rychter, A. Robson, E. Calonje                                           | 2002 | Case report of 1 patient |
| H. L. Tsai, Y. S. Huang, J. S. Hsieh, T. J. Huang, K. B. Tsai                                                | 2002 | Case report of 1 patient |
| M. Kamiyoshihara, K. Sakata, Y. Otani, O. Kawashima, T. Takahashi,<br>Y. Morishita                           | 2002 | Case report of 1 patient |
| H. Miura, O. Taira, S. Hiraguri, J. Maeda, H. Kato                                                           | 2002 | Case report of 1 patient |
| C. M. Chama, H. A. Nggada, A. Nuhu                                                                           | 2002 | Case report of 1 patient |
| W. Tyler, T. Barrett, F. Frassica, E. McCarthy                                                               | 2002 | Case report of 1 patient |
| I. Palaia, R. Angioli, G. Cutillo, N. Manci, P. B. Panici                                                    | 2002 | Case report of 1 patient |
| A. Viestenz, T. Berger, M. Kuchle                                                                            | 2002 | Case report of 1 patient |
| A. Bauza, P. Redondo, M. A. Idoate                                                                           | 2002 | Case report of 1 patient |
| L. D. Locati, P. Quattrone, N. Pizzi, A. Fior, G. Cantu, L. Licitra                                          | 2002 | Case report of 1 patient |
| L. Girao, R. Bajanca, M. Martins, V. Goncalves, L. N. Da Silva                                               | 2002 | Case report of 1 patient |
| L. Arrive, A. Vurgait, L. Monnier-Cholley, M. Lewin, P. Balladur, R.<br>Poupon, J. M. Tubiana                | 2002 | Case report of 1 patient |
| A. Ozet, M. I. Yilmaz, A. A. Yavuz, B. Ozturk, S. Komurcu, F. Arpaci                                         | 2003 | Case report of 1 patient |
| D. Senen, G. Adanali, A. Tuncel, B. Erdogan                                                                  | 2003 | Case report of 1 patient |
| T. Kiyohara, M. Kumakiri, K. Kawami, S. Kouraba, A. Takeuchi, T.<br>Sawai, L. M. Lao, S. Ansai, K. Hashimoto | 2003 | Case report of 1 patient |
| Y. S. Ro, J. H. Park, C. K. Park, C. W. Lee                                                                  | 2003 | Case report of 1 patient |
| C. C. Lan, H. S. Yu, W. T. Liao, R. C. Hsu, J. C. Chung, K. B. Tsai, G.<br>S. Chen                           | 2003 | Case report of 1 patient |
| P. K. Wright, M. K. Jha, P. D. Barrett, I. M. Bain                                                           | 2003 | Case report of 1 patient |
| H. Takeuchi, T. Kawano, T. Toda, Y. Minamisono, S. Nagasaki, T.                                              | 2003 | Case report of 1 patient |

|                                                                                                                                               |      |                          |
|-----------------------------------------------------------------------------------------------------------------------------------------------|------|--------------------------|
| <b>Yao, K. Sugimachi</b>                                                                                                                      |      |                          |
| A. Ottinetti, E. Colombo, F. Dardano, P. Migliora, F. Picciotto, A. Zaccagna, G. Angeli                                                       | 2003 | Case report of 1 patient |
| Y. Akman, K. Cam, A. Kavak, M. Alper                                                                                                          | 2003 | Case report of 1 patient |
| S. Shamsadini, A. Taheri, S. Dabiri, K. F. Damavandi, S. Salahi                                                                               | 2003 | Case report of 1 patient |
| D. C. Damin, A. R. Lazzaron, C. Tarta, A. Cartel, M. A. Rosito                                                                                | 2003 | Case report of 1 patient |
| W. Fink, A. Zimpfer, S. Ugurel                                                                                                                | 2003 | Case report of 1 patient |
| Y. B. Kim, S. K. Chang, W. I. Yang, J. S. Hahn, W. S. Koom, S. J. Shim, W. Park, K. K. Lee, C. O. Suh, G. E. Kim                              | 2003 | Case report of 1 patient |
| H. Suzuki, H. Kuwano, N. Masuda, S. Hashimoto, T. Saitoh, K. Kanoh, K. Nomoto, T. Shimura                                                     | 2003 | Case report of 1 patient |
| G. Marioni, D. Doro, F. Marino, P. Verdecchia, C. Staffieri, A. Staffieri                                                                     | 2003 | Case report of 1 patient |
| W. A. Tjalma, K. Watty                                                                                                                        | 2003 | Case report of 1 patient |
| N. Ali, S. ur-Rehman, M. Ali, I. Sabir, R. Azhar, S. Mansoor                                                                                  | 2003 | Case report of 1 patient |
| J. von Nida, C. Quirk                                                                                                                         | 2003 | Case report of 1 patient |
| D. S. Cassarino, W. Xue, K. J. Shannon                                                                                                        | 2003 | Case report of 1 patient |
| T. Kasai, K. Moriyama, M. Tsuji, K. Uema, N. Sakurai, Y. Fujii                                                                                | 2003 | Case report of 1 patient |
| W. Baran, A. Hryniewicz-Gwozdz, J. Maj, R. Maj                                                                                                | 2003 | Case report of 1 patient |
| R. Ogawa, R. Aoki, H. Hyakusoku                                                                                                               | 2003 | Case report of 1 patient |
| C. H. Chang, Y. L. Liao, H. S. Hong                                                                                                           | 2003 | Case report of 1 patient |
| T. K. Meyer, J. S. Rhee, M. M. Smith, M. J. Cruz, V. O. Osipov, P. A. Wackym                                                                  | 2003 | Case report of 1 patient |
| C. Bevona, Z. Tannous, H. Tsao                                                                                                                | 2003 | Case report of 1 patient |
| J. Y. Park, H. S. Lee, K. H. Cho                                                                                                              | 2003 | Case report of 1 patient |
| R. Goel, M. J. Contos, M. L. Wallace                                                                                                          | 2003 | Case report of 1 patient |
| V. Lo Re Iii, K. R. Fox, V. A. Ferrari, C. H. Scott, P. M. Kossev, J. R. Kostman                                                              | 2003 | Case report of 1 patient |
| J. D. Kiffer, H. G. Morris                                                                                                                    | 2003 | Case report of 1 patient |
| C. Y. Lin, C. T. Lee, J. S. Huang, L. C. Chang                                                                                                | 2003 | Case report of 1 patient |
| R. Yaghoobi, N. E. Mostoufi, N. Sina                                                                                                          | 2003 | Case report of 1 patient |
| K. Miura, Y. Kum, G. Han, Y. Tsutsui                                                                                                          | 2003 | Case report of 1 patient |
| S. D. St. Peter, C. C. Nguyen, D. C. Mulligan, A. A. Moss                                                                                     | 2003 | Case report of 1 patient |
| E. Hadjihannas, A. L. McDermott, A. T. Warfield, D. W. Proops, A. P. Reid                                                                     | 2003 | Case report of 1 patient |
| L. Torok, A. Kirschner, H. Ocsai, K. Olasz                                                                                                    | 2003 | Case report of 1 patient |
| G. K. Maheshwari, H. A. Baboo, M. H. Patel, M. K. Wadhwa, U. Gopal                                                                            | 2003 | Case report of 1 patient |
| S. P. Covello, T. R. Humphreys, J. B. Lee                                                                                                     | 2003 | Case report of 1 patient |
| F. Yoneyama, K. Tsuchie, K. Sakaguchi                                                                                                         | 2003 | Case report of 1 patient |
| S. R. Drummond, S. Fenton, E. P. Pantilidis, A. N. Harnett, E. G. Kemp                                                                        | 2003 | Case report of 1 patient |
| H. Devalia, R. Rao, A. Zaidi                                                                                                                  | 2003 | Case report of 1 patient |
| S. Machado, V. Costa, A. Canelhas, A. Massa                                                                                                   | 2003 | Case report of 1 patient |
| A. Ceydeli, J. Rucinski, A. Klipfel                                                                                                           | 2003 | Case report of 1 patient |
| S. Chikkamuniyappa                                                                                                                            | 2004 | Case report of 1 patient |
| M. Mitsuhashi, A. Kiyota, R. Yoshimura, M. Matsuyama, T. Nakatani, S. Wada, S. Ito, M. Yoshimoto, K. Funao, H. Kobayakawa, N. Nakao, A. Nakae | 2004 | Case report of 1 patient |
| T. Yanai, T. Okazaki, A. Yamataka, H. Fujita, M. Saito, G. Lane, Y. Yamashiro, T. Miyano                                                      | 2004 | Case report of 1 patient |
| K. T. Colvett, F. C. Wilson, R. A. Stanton                                                                                                    | 2004 | Case report of 1 patient |
| A. M. Avram, R. Gielczyk, L. Su, A. K. Vine, J. C. Sisson                                                                                     | 2004 | Case report of 1 patient |
| G. Herrmann, W. Groth, T. Krieg, C. Mauch                                                                                                     | 2004 | Case report of 1 patient |
| D. Sarid, N. Wigler, Z. Gutkin, O. Merimsky, L. Leider-Trejo, I. G. Ron                                                                       | 2004 | Case report of 1 patient |
| R. Wuntkal, A. Maheshwari, S. Gupta, M. Ramadwar, H. B. Tongaonkar                                                                            | 2004 | Case report of 1 patient |

|                                                                                                                                                    |      |                          |
|----------------------------------------------------------------------------------------------------------------------------------------------------|------|--------------------------|
| R. Pasricha, P. P. Mohanty, N. R. Datta                                                                                                            | 2004 | Case report of 1 patient |
| F. M. Al-Mashat                                                                                                                                    | 2004 | Case report of 1 patient |
| C. Hesling, M. D'Incan, S. Mansard, F. Franck, A. Corbin-Duval, C. Chevenet, P. Dechelotte, J. C. Madelmont, A. Veyre, P. Souteyrand, Y. J. Bignon | 2004 | Case report of 1 patient |
| N. S. Wong, B. M. Chang, H. C. Toh, W. H. Koo                                                                                                      | 2004 | Case report of 1 patient |
| T. J. Giuffrida, C. J. Kligora, G. D. Goldstein                                                                                                    | 2004 | Case report of 1 patient |
| F. Ghaemmaghami, M. Modares, N. Behtash, A. Z. Moosavi                                                                                             | 2004 | Case report of 1 patient |
| G. Pomara, I. Pastina, M. Simone, P. Casale, G. Marchetti, F. Francesca                                                                            | 2004 | Case report of 1 patient |
| O. Aydin, E. Ustundag, Z. Boyaci, B. Muezzinoglu                                                                                                   | 2004 | Case report of 1 patient |
| B. Gowardhan, M. E. Mathers, J. G. Feggetter                                                                                                       | 2004 | Case report of 1 patient |
| I. A. Aridogan, N. Satar, F. Doran, M. Z. Tansug                                                                                                   | 2004 | Case report of 1 patient |
| T. Akai, S. Shiraga, H. Iizuka, M. Kishibe, S. Kawakami, Y. Ueda                                                                                   | 2004 | Case report of 1 patient |
| R. Mihai, J. Christie-Brown, J. Bristol                                                                                                            | 2004 | Case report of 1 patient |
| R. A. Schwartz, M. Wiederkehr, W. C. Lambert                                                                                                       | 2004 | Case report of 1 patient |
| K. Mullinax, J. B. Cohen                                                                                                                           | 2004 | Case report of 1 patient |
| I. Saint-Cyr, A. M. Boisseau-Garsaud, F. Pont, D. Cales-Quist, R. Helenon, T. Chinyavong                                                           | 2004 | Case report of 1 patient |
| M. C. Lee, Y. L. Huang, C. H. Yang, T. T. Kuo, H. S. Hong                                                                                          | 2004 | Case report of 1 patient |
| J. L. Cohen, B. Barankin, D. M. Zloty, G. R. Mikhail                                                                                               | 2004 | Case report of 1 patient |
| N. Haas, St Hauptmann                                                                                                                              | 2004 | Case report of 1 patient |
| E. Grignaffini, F. Castagnetti, G. Bianco, R. Ricci, D. Di Mascio, M. M. Dominici, E. Caleffi                                                      | 2004 | Case report of 1 patient |
| D. M. Rowlands, J. M. Zasik, J. F. Reed III                                                                                                        | 2004 | Case report of 1 patient |
| J. E. Kurtz, S. Serra, B. Duclos, F. Broly, P. Dufour, J. P. Bergerat                                                                              | 2004 | Case report of 1 patient |
| P. Sirago, P. F. Soma, G. Grasso, L. Scrimali, G. Lomeo Jr                                                                                         | 2004 | Case report of 1 patient |
| M. Tariq, A. Kalan                                                                                                                                 | 2004 | Case report of 1 patient |
| C. H. Chang, Y. C. Chang, H. S. Hong                                                                                                               | 2004 | Case report of 1 patient |
| R. Preetha, V. S. Kavishwar, P. Butle                                                                                                              | 2004 | Case report of 1 patient |
| R. Gabriele, M. Borghese, M. Conte, L. Basso                                                                                                       | 2004 | Case report of 1 patient |
| J. H. Lin, J. Y. Y. Lee, S. C. Chao, C. J. Tsao                                                                                                    | 2004 | Case report of 1 patient |
| S. C. Chao, J. Y. Y. Lee                                                                                                                           | 2004 | Case report of 1 patient |
| C. S. Nayak                                                                                                                                        | 2005 | Case report of 1 patient |
| S. A. Al-Ani, C. Hernon, A. T. Sillitoe, P. A. Burgess, P. R. W. Stanley                                                                           | 2005 | Case report of 1 patient |
| K. J. Yu, H. E. Lee, H. C. Ho, J. C. Lee, J. W. Chang, H. S. Hong, C. H. Yang                                                                      | 2005 | Case report of 1 patient |
| H. Kavgaci, A. Reis, F. Ozdemir, O. Bektas, M. Arslan, F. Aydin                                                                                    | 2005 | Case report of 1 patient |
| A. I. Rubin, J. Bagel, G. Niedt                                                                                                                    | 2005 | Case report of 1 patient |
| V. S. Durvasula, S. Mahendran, J. W. Grant, P. Jani                                                                                                | 2005 | Case report of 1 patient |
| J. Y. Wang, C. Y. Chai, Y. C. Su, K. M. Soo, Y. S. Huang, T. J. Huang, J. S. Hsieh                                                                 | 2005 | Case report of 1 patient |
| N. Jain, M. Mirakhur, P. Flynn, K. A. Choudhari                                                                                                    | 2005 | Case report of 1 patient |
| M. Baydar, M. Dikilitas, A. Sevinc, S. Senel, F. Senel, I. Aydogdu                                                                                 | 2005 | Case report of 1 patient |
| K. Srivastava, S. Singh, M. Srivastava, A. N. Srivastava                                                                                           | 2005 | Case report of 1 patient |
| O. H. Lifshitz, J. M. Berlin, J. S. Taylor, W. F. Bergfeld                                                                                         | 2005 | Case report of 1 patient |
| C. Lim, R. Chan, W. Regan                                                                                                                          | 2005 | Case report of 1 patient |
| M. Fruh, T. Ruhstaller, J. Neuweiler, T. Cerny                                                                                                     | 2005 | Case report of 1 patient |
| A. C. Aygit, H. Top, B. Cakir, O. Yalcn                                                                                                            | 2005 | Case report of 1 patient |
| F. Fereidooni, K. Kovacs, M. R. Azizi, M. Nikoo                                                                                                    | 2005 | Case report of 1 patient |
| M. Sofikerim, I. Dogan, S. Ekici, N. Bayraktar, H. Ozen                                                                                            | 2005 | Case report of 1 patient |
| E. de Bree, E. Volalakis, D. Tsetis, Y. Varthalitis, J. Panagiotidis, J. Romanos, D. D. Tsiftsis                                                   | 2005 | Case report of 1 patient |
| K. Bassioulas, M. Nakuci, S. Dimou, M. Kanellopoulou, I. Alexis                                                                                    | 2005 | Case report of 1 patient |
| M. Y. Chen, Y. J. Chang, P. W. Shueng, C. H. Hsiao, Y. P. Shu, L. H.                                                                               | 2005 | Case report of 1 patient |

|                                                                                                                                                                                    |      |                          |
|------------------------------------------------------------------------------------------------------------------------------------------------------------------------------------|------|--------------------------|
| <b>Su, Y. L. Hsu</b>                                                                                                                                                               |      |                          |
| <b>A. H. Kalajian, G. F. Piparo, L. A. Scalf, J. A. Kooper, M. B. Morgan</b>                                                                                                       | 2005 | Case report of 1 patient |
| <b>M. Al-Shraim, B. Mahboub, P. C. Neligan, D. Chamberlain, D. Ghazarian</b>                                                                                                       | 2005 | Case report of 1 patient |
| <b>J. Shiraishi, M. Mukai, H. Yabe, R. Shibata, T. Yamada, K. Miura, U. Anazawa, H. Morioka, M. Sakamoto</b>                                                                       | 2005 | Case report of 1 patient |
| <b>T. Patel, R. Bansal, P. Trivedi, L. Modi, M. J. Shah</b>                                                                                                                        | 2005 | Case report of 1 patient |
| <b>H. Onishi, K. Kuriyama, T. Komiyama, M. Yamaguchi, S. Tanaka, K. Marino, N. Sano, T. Araki, K. Miyata</b>                                                                       | 2005 | Case report of 1 patient |
| <b>W. A. M. Blokk, D. J. Ruitter, M. A. J. Verdijk, P. C. M. De Wilde, R. W. Willems, E. M. G. J. De Jong, M. J. L. Ligtenberg</b>                                                 | 2005 | Case report of 1 patient |
| <b>D. P. Derienzo, R. J. Barr</b>                                                                                                                                                  | 2005 | Case report of 1 patient |
| <b>M. V. Karamouzis, A. Ardavanis, A. Alexopoulos, A. Papadopoulou, N. Apostolikas, G. Rigatos</b>                                                                                 | 2005 | Case report of 1 patient |
| <b>R. Koca, Y. Ustundag, E. Kargi, G. Numanoglu, H. C. Altinyazar</b>                                                                                                              | 2005 | Case report of 1 patient |
| <b>F. Gucer, F. Oz-Puyan, O. Yilmaz, N. Mulayim, P. Balkanli-Kaplan, M. A. Yuce</b>                                                                                                | 2005 | Case report of 1 patient |
| <b>D. Kakagia, D. Tamiolakis, G. Alexiadis, M. Lambropoulou, J. Manavis, A. Grekou, N. Papadopoulos</b>                                                                            | 2005 | Case report of 1 patient |
| <b>T. J. Walton, T. A. McCulloch, M. C. Bishop</b>                                                                                                                                 | 2005 | Case report of 1 patient |
| <b>E. A. West, S. I. White, K. Sidky, J. A. Green</b>                                                                                                                              | 2005 | Case report of 1 patient |
| <b>Y. I. Jeong, S. E. Chang, M. W. Lee, J. H. Choi, K. C. Moon, J. K. Koh</b>                                                                                                      | 2005 | Case report of 1 patient |
| <b>C. Giuliani, R. Cotellesse, M. Cino, D. Angelucci, F. Monari, G. Napolitano, F. Monaco, F. Francomano</b>                                                                       | 2005 | Case report of 1 patient |
| <b>C. H. Gow, Y. S. Liaw, Y. L. Chang, Y. C. Chang, R. S. Yang</b>                                                                                                                 | 2005 | Case report of 1 patient |
| <b>J. C. R. Bowling, A. Powles, N. Nasiri, A. Searle, C. B. Bunker</b>                                                                                                             | 2005 | Case report of 1 patient |
| <b>J. Gehl, P. F. Geertsen</b>                                                                                                                                                     | 2006 | Case report of 1 patient |
| <b>K. J. Busam, A. Halpern, A. A. Marghoob</b>                                                                                                                                     | 2006 | Case report of 1 patient |
| <b>J. Kaur, T. Puri, P. K. Julka, G. Gunabushanam, V. K. Iyer, M. K. Singh, M. Ramam</b>                                                                                           | 2006 | Case report of 1 patient |
| <b>C. Arcara, F. Fulfarò, G. Badalamenti, N. Gebbia, M. Arcara</b>                                                                                                                 | 2006 | Case report of 1 patient |
| <b>P. Anderson, C. T. Albarracin, E. Resetskova</b>                                                                                                                                | 2006 | Case report of 1 patient |
| <b>T. Fujita, Y. Ogasawara, M. Naito, H. Doihara, N. Shimizu</b>                                                                                                                   | 2006 | Case report of 1 patient |
| <b>P. Gerami, C. Shea, M. S. Stone</b>                                                                                                                                             | 2006 | Case report of 1 patient |
| <b>F. J. Lejeune, Y. Monnier, C. Ruegg</b>                                                                                                                                         | 2006 | Case report of 1 patient |
| <b>C. A. Block, L. Dahmouh, B. R. Konety</b>                                                                                                                                       | 2006 | Case report of 1 patient |
| <b>S. Kilickap, S. Aksoy, M. Dincer, E. A. Saglam, S. Yalcin</b>                                                                                                                   | 2006 | Case report of 1 patient |
| <b>F. Arias, R. Vives, M. L. Gomez-Dorransoro</b>                                                                                                                                  | 2006 | Case report of 1 patient |
| <b>P. Tansley, D. Dewar, D. Brown, M. Brough, M. Cook, S. Withey, P. Butler</b>                                                                                                    | 2006 | Case report of 1 patient |
| <b>A. Ravic-Nikolic, V. Milicic, B. Jovovic-Dagovic, G. Ristic</b>                                                                                                                 | 2006 | Case report of 1 patient |
| <b>S. Shamsadin, I. Esfandiarpour, H. Zeinali, B. Kalantari, H. Ebrahimi</b>                                                                                                       | 2006 | Case report of 1 patient |
| <b>A. Karakuzu, M. Koc, S. Ozdemir</b>                                                                                                                                             | 2006 | Case report of 1 patient |
| <b>M. Caloglu, K. Uygun, S. Altaner, C. Uzal, Z. Kocak, S. Piskin</b>                                                                                                              | 2006 | Case report of 1 patient |
| <b>Z. Yilmaz, T. Bese, F. Demirkiran, S. Ilvan, C. Sanioglu, M. Arvas, D. Kosebay</b>                                                                                              | 2006 | Case report of 1 patient |
| <b>M. H. Hedeshian, X. Wang, B. Xu, J. P. Fontaine, F. J. Podbielski</b>                                                                                                           | 2006 | Case report of 1 patient |
| <b>K. Yoshimoto, H. Kawahara, S. Nakajima, T. Hayashi, H. Kashiwagi, K. Yanaga</b>                                                                                                 | 2006 | Case report of 1 patient |
| <b>H. Rapprich, M. Hagedorn</b>                                                                                                                                                    | 2006 | Case report of 1 patient |
| <b>D. Aguiar Bujanda, R. Camacho Galan, J. Bastida Inarrea, J. Aguiar Morales, A. Conde Martel, P. Rivero Suarez, F. De Armas Diaz, U. Bohn Sarmiento, M. Angel Cabrera Suarez</b> | 2006 | Case report of 1 patient |
| <b>M. R. Muenster, M. P. Hoang</b>                                                                                                                                                 | 2006 | Case report of 1 patient |
| <b>R. Soulsby, E. Leung, N. Williams</b>                                                                                                                                           | 2006 | Case report of 1 patient |
| <b>G. Fyrmpas, N. Barbetakis, A. Efstathiou, I. Konstantinidis, C. Tsilikas</b>                                                                                                    | 2006 | Case report of 1 patient |

|                                                                                                          |      |                          |
|----------------------------------------------------------------------------------------------------------|------|--------------------------|
| N. A. Porter, H. L. Anderson, S. Al-Dujaily                                                              | 2006 | Case report of 1 patient |
| A. B. Gaussmann, D. Imhoff, E. Lambrecht, C. Menzel, S. Mose                                             | 2006 | Case report of 1 patient |
| B. Gallagher, G. Yousef, L. Bishop                                                                       | 2006 | Case report of 1 patient |
| R. Junik, J. Klubo-Gwiedzinska, Z. Zuchora, W. Zmyslowski                                                | 2006 | Case report of 1 patient |
| A. L. Kronic, C. J. Cockerell, J. Truelson, R. S. Taylor                                                 | 2006 | Case report of 1 patient |
| A. Glisic                                                                                                | 2006 | Case report of 1 patient |
| V. S. S. Attili, C. Rama Chandra, H. K. Dadhich, T. P. Sahoo, G. Anupama, P. P. Bapsy                    | 2006 | Case report of 1 patient |
| R. De Bree, B. M. Tijink, C. J. Van Groeningen, C. R. Leemans                                            | 2006 | Case report of 1 patient |
| H. Fukuda, R. Saito                                                                                      | 2006 | Case report of 1 patient |
| M. Snoj, Z. Rudolf, S. M. Paulin-Kosir, M. Cemazar, R. Snoj, G. Sersa                                    | 2006 | Case report of 1 patient |
| M. R. Kesting, D. J. Loeffelbein, F. Holzle, K. D. Wolff, M. Ebsen                                       | 2006 | Case report of 1 patient |
| B. Swinson, F. Ryan, A. W. Barrett, W. Jerjes, G. Landon, E. Calonje, N. Kalavrezos                      | 2006 | Case report of 1 patient |
| E. J. Chisholm, A. Banerjee, J. M. Pickles                                                               | 2006 | Case report of 1 patient |
| T. Klimis, J. Papanicolaou, E. Alexandris                                                                | 2006 | Case report of 1 patient |
| A. Banka, A. Alfadley                                                                                    | 2006 | Case report of 1 patient |
| J. Utikal, A. Thielke, J. C. Becker, R. Figl, S. Goerdts, D. Schadendorf, S. Ugurel                      | 2006 | Case report of 1 patient |
| R. Ram, N. Natanzi, P. Saadat, D. Eliav, M. S. Vadmal                                                    | 2006 | Case report of 1 patient |
| F. Arias de la Vega, M. L. Gomez Dorronsoro, F. J. Jimenez                                               | 2006 | Case report of 1 patient |
| J. H. Lee, P. K. Lee, S. T. Ahn, D. Y. Oh, J. W. Rhie, K. T. Han                                         | 2006 | Case report of 1 patient |
| M. K. Hsin, A. P. Yim                                                                                    | 2007 | Case report of 1 patient |
| F. Ai-Ping, Q. Yue, W. Yan                                                                               | 2007 | Case report of 1 patient |
| S. K. Somasundaram, R. K. Balasubramanian, F. Aref, S. Karim, R. Vashisht                                | 2007 | Case report of 1 patient |
| A. Afshar, H. Ayatollahy, S. Lotfinejad                                                                  | 2007 | Case report of 1 patient |
| C. H. Chen, K. C. Chao, P. H. Wang                                                                       | 2007 | Case report of 1 patient |
| H. A. Gay, R. Cavalieri, R. R. Allison, J. Finley, W. D. Quan, Jr.                                       | 2007 | Case report of 1 patient |
| H. L. Ko, Y. W. Tsang, K. H. Chi                                                                         | 2007 | Case report of 1 patient |
| A. Amador, N. G. Monforte, N. Bejarano, J. Marti, E. Artigau, S. Navarro, J. Fuster                      | 2007 | Case report of 1 patient |
| P. de Agustin, E. Conde, N. Alberti, A. Perez-Barrios, F. Lopez-Rios                                     | 2007 | Case report of 1 patient |
| G. Nisi, L. Grimaldi, C. Brandi, A. Silvestri, A. Brafa, M. Calabro, C. D'Aniello                        | 2007 | Case report of 1 patient |
| H. Hafez                                                                                                 | 2007 | Case report of 1 patient |
| F. P. French, P. M. Murray, G. Perdakis                                                                  | 2007 | Case report of 1 patient |
| I. Coman, N. Crisan, B. Petrut, C. Bungardean, T. Cristea, D. Crisan                                     | 2007 | Case report of 1 patient |
| S. Roy, N. Q. Shafi, M. G. Rose                                                                          | 2007 | Case report of 1 patient |
| V. Yurut-Caloglu, M. Caloglu, F. Ozyilmaz, M. Saynak, R. Cosar-Alas, H. Karagol, G. Bayir-Angin, C. Uzal | 2007 | Case report of 1 patient |
| S. R. McLean, S. Shousha, N. Francis, A. Lim, S. Eccles, M. Nathan, C. S. Brock, C. Palmieri             | 2007 | Case report of 1 patient |
| J. W. Nash, T. L. Barrett, M. Kies, M. I. Ross, N. Sneige, A. H. Diwan, A. J. Lazar                      | 2007 | Case report of 1 patient |
| M. A. Buttaro, A. J. Guala, V. Vigorita, F. Piccaluga                                                    | 2007 | Case report of 1 patient |
| M. M. Ouseph, G. K. Sharan, P. Sharma, A. K. Rathi, J. Shyama, K. Singh, A. K. Bahadur                   | 2007 | Case report of 1 patient |
| G. Dogan, A. Kizilay                                                                                     | 2007 | Case report of 1 patient |
| V. Yendluri, B. Centeno, G. M. Springett                                                                 | 2007 | Case report of 1 patient |
| N. D. Shah, S. R. Diwanji                                                                                | 2007 | Case report of 1 patient |
| K. Bhatia, A. K. Vaid, S. Rawal, K. D. Patole                                                            | 2007 | Case report of 1 patient |
| Y. O. Arat, M. Boniuk                                                                                    | 2007 | Case report of 1 patient |
| A. L. Kronic, H. M. Chen, K. Lopatka                                                                     | 2007 | Case report of 1 patient |
| D. L. Damian, J. F. Thompson                                                                             | 2007 | Case report of 1 patient |
| G. Shistik, A. V. Prakash, N. A. Fenske, L. F. Glass                                                     | 2007 | Case report of 1 patient |

|                                                                                                                                |      |                          |
|--------------------------------------------------------------------------------------------------------------------------------|------|--------------------------|
| J. J. Chung, T. Namiki, D. W. Johnson                                                                                          | 2007 | Case report of 1 patient |
| S. Mahmood, S. R. M. De Llano                                                                                                  | 2007 | Case report of 1 patient |
| P. O. Emanuel, M. T. Idrees, A. Leytin, E. J. Kwon, R. G. Phelps                                                               | 2007 | Case report of 1 patient |
| Y. C. Eun, H. K. Tae, D. P. Seok, J. Y. Ki, C. C. Suck, C. K. Haak, H. N. Yong                                                 | 2007 | Case report of 1 patient |
| S. Kovacic, A. Lovrencic-Huzjan, G. Drpa, J. Hat, S. Belina                                                                    | 2007 | Case report of 1 patient |
| G. Nasti, G. Facchini, M. Caraglia, R. Franco, A. Mura, M. Staiano, A. Budillon, R. V. Iaffaioli, A. Ottaiano                  | 2007 | Case report of 1 patient |
| C. Stanko, L. Grandinetti, M. Baldassano, M. Mahmoodi, G. R. Kantor                                                            | 2007 | Case report of 1 patient |
| D. E. D. C. Perez, J. Magrin, O. P. De Almeida, L. P. Kowalski                                                                 | 2007 | Case report of 1 patient |
| S. van Ruth, E. B. L. van Dorst, M. R. Canninga-van Dijk, M. S. de Bruin-Weller                                                | 2007 | Case report of 1 patient |
| K. Rhiem, M. Possover, A. Gossmann, K. Drebber, P. Mallmann, U. Ulrich                                                         | 2007 | Case report of 1 patient |
| D. G. Blazer Iii, V. K. Sondak, M. S. Sabel                                                                                    | 2007 | Case report of 1 patient |
| N. Ozturk, M. Erdim, A. Sonmez, M. Bayramicli                                                                                  | 2007 | Case report of 1 patient |
| S. Brogioni, P. Viacava, L. Tomisti, E. Martino, E. Macchia                                                                    | 2007 | Case report of 1 patient |
| A. F. Atmaca, Z. Akbulut, A. Demirci, O. Belenli, S. Alici, M. D. Balbay                                                       | 2007 | Case report of 1 patient |
| K. Miyazaki, H. Masuko, H. Satoh, M. Ohtsuka                                                                                   | 2007 | Case report of 1 patient |
| F. Mollinedo                                                                                                                   | 2007 | Case report of 1 patient |
| D. H. Koo, H. M. Chang, J. Y. Jung, J. H. Song, J. L. Lee, M. H. Ryu, T. W. Kim, J. H. Yook, J. S. Song, J. S. Lee, Y. K. Kang | 2007 | Case report of 1 patient |
| S. Riley, T. Wah                                                                                                               | 2007 | Case report of 1 patient |
| M. A. Buttaro, A. J. Guala, V. Vigorita, F. Piccaluga                                                                          | 2007 | Case report of 1 patient |
| N. Kato, A. Tamura, Y. Yamanaka, S. Tanimura, H. Minakawa                                                                      | 2007 | Case report of 1 patient |
| F. Salameh, I. Henig, R. Bar-Shalom, I. Maza                                                                                   | 2007 | Case report of 1 patient |
| O. A. Kerr, P. Mariappan, P. Bollina, K. Grigor, E. C. Benton                                                                  | 2007 | Case report of 1 patient |
| S. J. Ahn, S. H. Oh, S. E. Chang, Y. Jeung Ii, M. W. Lee, J. H. Choi, K. C. Moon, J. K. Koh                                    | 2007 | Case report of 1 patient |
| J. Breedlove, S. Cho, S. Gunning                                                                                               | 2007 | Case report of 1 patient |
| N. Levine                                                                                                                      | 2007 | Case report of 1 patient |
| S. Altintas, N. Blockx, M. T. Huizing, J. Van den Brande, L. Hoekx, J. P. Bogers, E. Van Marck, J. B. Vermorcken               | 2007 | Case report of 1 patient |
| S. Reddy, R. H. Bang, M. E. Contreras                                                                                          | 2007 | Case report of 1 patient |
| C. Y. Wu, C. C. Chang, H. C. Chang                                                                                             | 2008 | Case report of 1 patient |
| J. Christie                                                                                                                    | 2008 | Case report of 1 patient |
| E. V. Koutis, D. A. Assimakopoulos, M. G. Doukas, I. Zinovieva                                                                 | 2008 | Case report of 1 patient |
| G. J. Bauerschmitz, D. Karan, K. Zwiefel, H. G. Bender, S. Mohrmann                                                            | 2008 | Case report of 1 patient |
| A. Abhishek, M. M. Ouseph, P. Sharma, V. Kamal, M. Sharma                                                                      | 2008 | Case report of 1 patient |
| S. N. Senapati, D. R. Samanta, P. K. Das, A. Byondyopadhyay, A. Mohantya                                                       | 2008 | Case report of 1 patient |
| A. Bujons, X. Pascual, R. Martinez, O. Rodriguez, J. Palou, H. Villavicencio                                                   | 2008 | Case report of 1 patient |
| D. Q. He, C. G. Hua, X. F. Tang, Y. Feng                                                                                       | 2008 | Case report of 1 patient |
| J. Chakraborty, A. Bandyopadhyay, M. K. Choudhuri, K. Mitra, D. Guha, M. G. Mallik                                             | 2008 | Case report of 1 patient |
| J. S. Lehman, J. C. Benacci                                                                                                    | 2008 | Case report of 1 patient |
| E. Savk, A. Kolay, I. Meteoglu, A. Unsal, H. Cevikel, M. Uslu, G. Karaman, N. Sendur, I. Erdogdu                               | 2008 | Case report of 1 patient |
| S. Borkar, N. Pandit-Taskar                                                                                                    | 2008 | Case report of 1 patient |
| S. Agarwal, S. Rao, A. Arya, K. Gupta, R. Arora, I. Dhawan                                                                     | 2008 | Case report of 1 patient |
| R. A. Kwong, S. Kossard                                                                                                        | 2008 | Case report of 1 patient |
| C. Vijayasekar, S. Noormohamed, M. J. Cheetham                                                                                 | 2008 | Case report of 1 patient |
| T. J. Chen, C. C. Chiou, C. H. Chen, T. T. Kuo, H. S. Hong                                                                     | 2008 | Case report of 1 patient |
| F. Egberts, T. Mentzel, I. Leuschner, G. Metzler, R. Folster-Holst                                                             | 2008 | Case report of 1 patient |
| D. Jasaitiene, S. Valiukeviciene, J. Makstiene, E. B. Juodzbaliene                                                             | 2008 | Case report of 1 patient |

|                                                                                                                                                                        |      |                          |
|------------------------------------------------------------------------------------------------------------------------------------------------------------------------|------|--------------------------|
| F. Fantini, G. Gualdi, A. Cimitan, A. Giannetti                                                                                                                        | 2008 | Case report of 1 patient |
| J. Mitsuya, H. Hara, K. Ito, N. Ishii, T. Hashimoto, T. Terui                                                                                                          | 2008 | Case report of 1 patient |
| S. Paradela, I. Castineiras, J. Cuevas, M. Almagro, J. del Pozo, E. Fonseca                                                                                            | 2008 | Case report of 1 patient |
| K. Cupisti, U. Ramp, A. Raffel, M. Krausch, A. Rehders, W. T. Knoefel                                                                                                  | 2008 | Case report of 1 patient |
| F. Egberts, K. C. Kaehler, J. Brasch, T. Schwarz, L. Cerroni, A. Hauschild                                                                                             | 2008 | Case report of 1 patient |
| Y. Yildirim, Y. Akcay, O. Ozyilkan, B. Celasun                                                                                                                         | 2008 | Case report of 1 patient |
| H. S. Kim, N. H. Park, S. B. Kang                                                                                                                                      | 2008 | Case report of 1 patient |
| A. Moussa, W. Denguezli, L. Njim, A. Haddad, R. Faleh, M. Sakouhi, A. Zakhama                                                                                          | 2008 | Case report of 1 patient |
| J. Thariat, C. Badoual, S. Hans, T. Meatchi, M. Housset                                                                                                                | 2008 | Case report of 1 patient |
| A. Gleizal, J. M. Torossian, D. C. Wan, J. L. Beziat                                                                                                                   | 2008 | Case report of 1 patient |
| N. Behtash, N. Mehrdad, A. Shamshirsaz, R. Hashemi, F. Amouzegar Hashemi                                                                                               | 2008 | Case report of 1 patient |
| A. Weidmann, K. Harkins                                                                                                                                                | 2008 | Case report of 1 patient |
| M. F. Varsegi, S. M. Ravis, E. M. Hattab, J. D. Henley, S. D. Billings                                                                                                 | 2008 | Case report of 1 patient |
| L. V. Kalialis, K. T. Drzewiecki, M. Mohammadi, A. B. Mehlsen, H. Klyver                                                                                               | 2008 | Case report of 1 patient |
| H. H. Alphs, J. Miles-Thomas, F. Attenello, J. M. Taube, G. Fonseca, T. J. Guzzo, M. P. Schoenberg, T. J. Bivalacqua                                                   | 2008 | Case report of 1 patient |
| P. Mahzouni, F. Sarreshtedar, A. A. Besharati, A. Naeimi, A. Eftekhari                                                                                                 | 2008 | Case report of 1 patient |
| R. T. Bakelaar, J. T. Soper, C. V. Lutman                                                                                                                              | 2008 | Case report of 1 patient |
| K. Tsuji, T. Hamada, A. Uenaka, H. Wada, E. Sato, M. Isobe, K. Asagoe, O. Yamasaki, H. Shiku, G. Ritter, R. Murphy, E. W. Hoffman, L. J. Old, E. Nakayama, K. Iwatsuki | 2008 | Case report of 1 patient |
| M. Kaplan, M. Caloglu, V. Y. Caloglu, T. Aktoz, U. Usta, H. Karagol, O. Inci                                                                                           | 2008 | Case report of 1 patient |
| N. Marti, I. Molina, C. Monteagudo, V. Lopez, L. Garcia, E. Jorda                                                                                                      | 2008 | Case report of 1 patient |
| A. A. Garrido-Rios, C. Carrera, S. Puig, P. Aguilera, G. Salerni, J. Malveyh                                                                                           | 2008 | Case report of 1 patient |
| T. Kubo, S. Shimose, T. Matsuo, K. Arihiro, M. Ochi                                                                                                                    | 2008 | Case report of 1 patient |
| G. C. Bloemsa, O. Lapid                                                                                                                                                | 2008 | Case report of 1 patient |
| T. B. Cosentino, M. T. Brazao-Silva, K. C. d N. Souza, P. R. de Faria, S. de Moraes, A. M. Loyola, S. J. da Silva, S. V. Cardoso                                       | 2008 | Case report of 1 patient |
| H. Abdel Hafez                                                                                                                                                         | 2008 | Case report of 1 patient |
| J. Bucerius, S. Meyka, M. Bangard, H. J. Biersack, N. Eter                                                                                                             | 2008 | Case report of 1 patient |
| C. Blick, S. Abdelhadi, D. Bailey, J. Kelleher, A. Muneer                                                                                                              | 2008 | Case report of 1 patient |
| E. Polito, P. Pichierri, R. Occhini, A. Loffredo, A. Moramarco, A. Balestrazzi                                                                                         | 2008 | Case report of 1 patient |
| K. A. El-Gendy, G. K. Atkin, R. E. Brightwell, P. Richman, J. I. Livingstone                                                                                           | 2008 | Case report of 1 patient |
| P. Hurmuz, U. Selek, F. Zorlu, G. Tekuzman                                                                                                                             | 2008 | Case report of 1 patient |
| F. Tomao, E. Miele, G. P. Spinelli, G. Caprio, E. Ranieri, P. Mingazzini, A. Zullo, S. Tomao                                                                           | 2008 | Case report of 1 patient |
| N. Kawasaki, Y. Suzuki, T. Kato, K. Tsuboi, A. Matsumoto, H. Kashiwagi                                                                                                 | 2008 | Case report of 1 patient |
| S. Aoyagi, M. Akiyama, M. Mashiko, A. Shibaki, H. Shimizu                                                                                                              | 2008 | Case report of 1 patient |
| M. Fambrini, K. L. Andersson, A. M. Buccoliero, A. Pieralli, L. Livi, M. Marchionni                                                                                    | 2008 | Case report of 1 patient |
| H. Alkhayat, R. Alsulaiti, A. Darwish                                                                                                                                  | 2008 | Case report of 1 patient |
| S. Minakawa, K. Nakajima, T. Aizu, M. Kaimori, K. Nomura                                                                                                               | 2008 | Case report of 1 patient |
| D. A. Kasper, A. Saxena                                                                                                                                                | 2008 | Case report of 1 patient |
| T. Cil, A. Altintas, S. Pasa, A. Isikdogan                                                                                                                             | 2008 | Case report of 1 patient |
| H. Z. Abdel-Hafez                                                                                                                                                      | 2008 | Case report of 1 patient |
| T. Y. Yoon, J. H. Yun, J. Y. Lee, M. K. Kim                                                                                                                            | 2008 | Case report of 1 patient |

|                                                                                                                                  |      |                          |
|----------------------------------------------------------------------------------------------------------------------------------|------|--------------------------|
| H. J. Lee, S. E. Chang, M. W. Lee, J. H. Choi, K. C. Moon, J. K. Koh                                                             | 2008 | Case report of 1 patient |
| D. C. Ding, T. Y. Chu, Y. H. Hsu                                                                                                 | 2008 | Case report of 1 patient |
| A. P. Hapa, G. Erkin, G. Boztepe, D. E. Baydar, H. Ustun                                                                         | 2008 | Case report of 1 patient |
| T. Bahar, H. Borman, N. M. Ertas, T. Seyhan                                                                                      | 2008 | Case report of 1 patient |
| N. Sheth, G. Petrof, D. Greenblatt, S. Patel, K. Acland                                                                          | 2008 | Case report of 1 patient |
| T. Kawaguchi, S. Iwase, H. Takeuchi, A. Ikeda, Y. Kuroda, N. Sakata,<br>M. Umeda, K. Kobara, T. Matsunaga, S. Unezaki, Y. Nagumo | 2009 | Case report of 1 patient |
| K. Mendez, Y. Avellanet, S. Umpierre                                                                                             | 2009 | Case report of 1 patient |
| F. Santiago, S. Saleiro, M. M. Brites, C. Frutuoso, A. Figueiredo                                                                | 2009 | Case report of 1 patient |
| I. Tsolakis, G. Lampropoulos, V. Zolota, S. Papadoulas, N. Christeas                                                             | 2009 | Case report of 1 patient |
| U. Otsu, N. Fukui, M. Iki, S. Moriwaki, K. Kiyokane                                                                              | 2009 | Case report of 1 patient |
| G. Heber, D. Helbig, I. Ponitzsch, T. Wetzig, W. Harth, J. C. Simon                                                              | 2009 | Case report of 1 patient |
| Y. Peng, H. Y. Wang, K. H. Molberg                                                                                               | 2009 | Case report of 1 patient |
| A. M. Sesterhenn, W. Pfutzner, D. M. Braulke, S. Wiegand, J. A.<br>Werner, A. Taubert                                            | 2009 | Case report of 1 patient |
| R. Mukhia, S. Shrestha, K. Malla, V. K. Sharma                                                                                   | 2009 | Case report of 1 patient |
| A. P. Bray, N. A. Wong, S. Narayan                                                                                               | 2009 | Case report of 1 patient |
| W. J. Lee, C. H. Kim, S. E. Chang, M. W. Lee, J. H. Choi, K. C. Moon,<br>J. K. Koh                                               | 2009 | Case report of 1 patient |
| N. Barbetakis, D. Paliouras, C. Asteriou, G. Samanidis, A. Kleontas, D.<br>Anestakis, K. Kaplanis, C. Tsilikas                   | 2009 | Case report of 1 patient |
| C. S. Muller, J. Reichrath, W. Tilgen                                                                                            | 2009 | Case report of 1 patient |
| A. M. Elbahaie, D. E. Kamel, J. Lawrence, N. G. Davidson                                                                         | 2009 | Case report of 1 patient |
| A. Kurihara, M. Watanabe                                                                                                         | 2009 | Case report of 1 patient |
| H. Ozdemir, G. Tuncbilek                                                                                                         | 2009 | Case report of 1 patient |
| J. Manonukul, P. Omeapinyan, A. Vongjirad                                                                                        | 2009 | Case report of 1 patient |
| G. Miliaras, P. P. Tsitsopoulos, S. Markoula, A. Kyritsis, K. S.<br>Polyzoidis, V. Malamou-Mitsi                                 | 2009 | Case report of 1 patient |
| W. J. Lee, M. S. Kim, S. E. Chang, M. W. Lee, J. H. Choi, K. C. Moon,<br>J. K. Koh                                               | 2009 | Case report of 1 patient |
| E. M. Wain, N. K. Webber, C. M. Stefanato, P. Banerjee, S. L. Morris                                                             | 2009 | Case report of 1 patient |
| V. de Giorgi, B. Alfaioli, D. Massi, E. Wnekowicz, S. Sestini, F. Papi,<br>M. Grazzini, T. Lotti                                 | 2009 | Case report of 1 patient |
| L. K. Simpson, L. S. Ostlere, C. Harland, S. Gharai                                                                              | 2009 | Case report of 1 patient |
| M. Sanguenza                                                                                                                     | 2009 | Case report of 1 patient |
| D. Cunha, F. A. Pacheco, J. Cardoso                                                                                              | 2009 | Case report of 1 patient |
| K. O. Alsaad, N. Obaidat, V. Dube, W. Chapman, D. Ghazarian                                                                      | 2009 | Case report of 1 patient |
| M. Bruglia, G. Palmonella, F. Silveti, P. Rutigliano, P. Criante, C.<br>Marmorale, M. Boscaro, A. Taccaliti                      | 2009 | Case report of 1 patient |
| M. Tazbir, G. Broniarczyk-Dyla, P. Pluta                                                                                         | 2009 | Case report of 1 patient |
| D. M. McWeeney, S. T. Martin, R. S. Ryan, I. N. Tobbia, P. P.<br>Donnellan, K. M. Barry                                          | 2009 | Case report of 1 patient |
| L. S. Ward, C. A. Coelho Rezende, E. C. Morari, E. Camacho, J.<br>Vassallo                                                       | 2009 | Case report of 1 patient |
| M. Basely, P. Bernard, O. Gisserot, P. Maszelin, E. Bussy, J. P. De<br>Jaureguiberry                                             | 2009 | Case report of 1 patient |
| S. Moyano, P. Aguilera, A. Petit, E. de Alava, J. M. Mascaro, J. Palou,<br>J. Ferrando, L. Alos                                  | 2009 | Case report of 1 patient |
| R. Azarhoush, M. Taziki, M. Golalipour, B. Arya                                                                                  | 2009 | Case report of 1 patient |
| A. Moonda, S. Fatteh                                                                                                             | 2009 | Case report of 1 patient |
| M. Magana, L. M. Gomez                                                                                                           | 2009 | Case report of 1 patient |
| S. J. Karpate, S. L. Samal, S. M. Jain                                                                                           | 2009 | Case report of 1 patient |
| A. Deshpande, E. Mumba, B. Mukhopadhyay                                                                                          | 2009 | Case report of 1 patient |
| N. Barbetakis, G. Samanidis, D. Paliouras, E. Samanidou, Z.<br>Tzimirota, C. Asteriou, P. Xirou, C. Tsilikas                     | 2009 | Case report of 1 patient |
| U. Morelli, R. Cirocchi, V. Mecarelli, E. Farinella, F. La Mura, P.                                                              | 2009 | Case report of 1 patient |



|                                                                                                                                 |      |                          |
|---------------------------------------------------------------------------------------------------------------------------------|------|--------------------------|
| <b>Ronca, G. Giustozzi, F. Sciannameo</b>                                                                                       |      |                          |
| <b>G. F. Samelis, K. A. Ekmektzoglou, A. Tsiakou, M. M. Konstadoulakis</b>                                                      | 2009 | Case report of 1 patient |
| <b>S. V. Fletcher, D. E. Laws, J. McCutcheon, P. Perkins</b>                                                                    | 2009 | Case report of 1 patient |
| <b>B. Ozmen, Y. E. Sukur, C. Atabekoglu, M. Gungor</b>                                                                          | 2009 | Case report of 1 patient |
| <b>A. Milano, V. Cecinati, E. Bonifazi</b>                                                                                      | 2009 | Case report of 1 patient |
| <b>A. Lowichik, A. Putnam, S. L. Vanderhooft, C. M. Coffin</b>                                                                  | 2009 | Case report of 1 patient |
| <b>G. Santos, M. De Alvarenga, V. Borlot, M. A. Moutinho, M. De Franco</b>                                                      | 2009 | Case report of 1 patient |
| <b>M. A. Arrabal-Polo, S. A. Arias-Santiago, J. Aneiros-Fernandez, P. Burkhardt-Perez, M. Arrabal-Martin, R. Naranjo-Sintes</b> | 2009 | Case report of 1 patient |
| <b>B. Ruhland, C. Dittmer, M. Thill, K. Diedrich, D. Fischer</b>                                                                | 2009 | Case report of 1 patient |
| <b>G. Utkan, A. Buyukcelik, A. H. Okcu, U. Avci, B. Yalcin, F. Icli</b>                                                         | 2009 | Case report of 1 patient |
| <b>S. Cahill, J. R. Cryer, S. J. Otter, K. Ramesar</b>                                                                          | 2009 | Case report of 1 patient |
| <b>R. Kitazawa, F. Yamamichi, T. Hidaka, S. Morishita, T. Kondo, K. Mori, S. Kitazawa</b>                                       | 2009 | Case report of 1 patient |
| <b>J. C. Lee, T. Christensen, C. J. O'Hara</b>                                                                                  | 2009 | Case report of 1 patient |
| <b>P. Shukla, D. Gupta, S. S. Bisht, M. C. Pant</b>                                                                             | 2009 | Case report of 1 patient |
| <b>S. Avcu, M. Izmirlı, H. N. Ozcan, I. Sengul, M. Lemmerling</b>                                                               | 2009 | Case report of 1 patient |
| <b>J. Wang, Y. Q. Shi, Z. Y. Wu</b>                                                                                             | 2009 | Case report of 1 patient |
| <b>D. Fusco, F. Pasternack, K. Ward, M. Grossman, K. O'Toole, D. Saluja, J. A. Luchsinger</b>                                   | 2009 | Case report of 1 patient |
| <b>F. Marengo, P. Fava, G. MacRipO, P. Quaglino, P. Savoia, M. G. Bernengo</b>                                                  | 2009 | Case report of 1 patient |
| <b>R. S. Patel, D. J. Enepekides, K. M. Higgins, S. Raphael, J. M. Balogh</b>                                                   | 2009 | Case report of 1 patient |
| <b>H. S. Kim, S. H. Cha, H. O. Kim, Y. M. Park</b>                                                                              | 2009 | Case report of 1 patient |
| <b>J. L. Woo, M. K. Seong, H. W. Chong, E. C. Sung, W. L. Mi, H. C. Jee, C. M. Kee</b>                                          | 2009 | Case report of 1 patient |
| <b>C. Y. Wu, H. W. Gao, W. H. Huang, C. M. Chao</b>                                                                             | 2009 | Case report of 1 patient |
| <b>M. Alkassar, S. Gottschling, T. Krenn, N. Graf</b>                                                                           | 2009 | Case report of 1 patient |
| <b>S. Hashitani, K. Sakurai, K. Takaoka, M. Urade</b>                                                                           | 2009 | Case report of 1 patient |
| <b>S. MacHnick, T. Butz, M. Van Bracht, C. Zuhlke, G. Plehn, H. Yeni, A. Meissner, H. J. Trappe</b>                             | 2009 | Case report of 1 patient |
| <b>C. Rosendahl, A. Cameron, I. Zalaudek</b>                                                                                    | 2009 | Case report of 1 patient |
| <b>T. Mukherjee, R. Dutta, V. Chandran, R. S. Bawa, C. Mohan</b>                                                                | 2009 | Case report of 1 patient |
| <b>K. H. Lim, K. W. Lee, J. H. Kim, S. Y. Park, S. H. Choi, J. S. Lee</b>                                                       | 2010 | Case report of 1 patient |
| <b>S. S. Gupta, O. Singh</b>                                                                                                    | 2010 | Case report of 1 patient |
| <b>S. D. Mahore, K. A. Bothale, A. D. Patrikar, A. M. Joshi</b>                                                                 | 2010 | Case report of 1 patient |
| <b>H. Takagi, S. Miura, K. Matsunami, T. Ikeda, A. Imai</b>                                                                     | 2010 | Case report of 1 patient |
| <b>D. Lalich, O. Tawfik, J. Chapman, G. Fraga</b>                                                                               | 2010 | Case report of 1 patient |
| <b>T. Pontinen, A. Melin, G. Varadi, K. Khanmoradi, D. Chewaproug, S. C. Kung, R. Zaki, J. Ortiz</b>                            | 2010 | Case report of 1 patient |
| <b>H. Shimizu, J. Maegawa, T. Ho, Y. Yamamoto, T. Mikami, K. Nagahama</b>                                                       | 2010 | Case report of 1 patient |
| <b>A. Agrawal, A. Yau, A. Magliocco, P. Chu</b>                                                                                 | 2010 | Case report of 1 patient |
| <b>A. R. Wang, M. O'Brien, R. Ross, T. Long, L. Robinson-Bostom</b>                                                             | 2010 | Case report of 1 patient |
| <b>O. Abbas, K. Reddy, M. F. Demierre, R. A. Blanchard, M. Mahalingam</b>                                                       | 2010 | Case report of 1 patient |
| <b>I. Cozzolino, R. Bianco, E. Vigliar, A. Vetrani, G. C. Troncone, P. Zeppa</b>                                                | 2010 | Case report of 1 patient |
| <b>R. von Moos, R. Schaffner, R. Cathomas, B. Grimm</b>                                                                         | 2010 | Case report of 1 patient |
| <b>C. Nashed, S. V. Sakpal, S. Cherneykin, R. S. Chamberlain</b>                                                                | 2010 | Case report of 1 patient |
| <b>M. A. Goodier, J. R. Jordan</b>                                                                                              | 2010 | Case report of 1 patient |
| <b>W. Shon, S. B. Ferguson, N. I. Comfere</b>                                                                                   | 2010 | Case report of 1 patient |
| <b>V. Samedi, S. White, M. J. Zimarowski, A. Harris, J. Saffitz, H. H. Wang</b>                                                 | 2010 | Case report of 1 patient |
| <b>K. L. Chuang, C. C. Liaw, S. H. Ueng, S. K. Liao, S. T. Pang, Y. H. Chang, H. C. Chuang, C. K. Chuang</b>                    | 2010 | Case report of 1 patient |
| <b>M. Grabiec, M. Walentowicz, A. Marszalek</b>                                                                                 | 2010 | Case report of 1 patient |

|                                                                                                                                          |      |                          |
|------------------------------------------------------------------------------------------------------------------------------------------|------|--------------------------|
| S. Demirci, F. Yavas, Z. Ozsaran, A. Ozsaran, Y. Dikmen, O. Zekioglu, B. Karabulut, A. B. Aras                                           | 2010 | Case report of 1 patient |
| A. I. Sevinc, A. E. Canda, T. Unek, S. Canda, M. A. Kocdor, S. Saydam, O. Harmancioglu                                                   | 2010 | Case report of 1 patient |
| P. P. Gupta, K. B. Gupta, J. Gulia, D. Agarwal, D. Mehta                                                                                 | 2010 | Case report of 1 patient |
| M. Sohsman, H. M. Yang, D. S. Cassarino                                                                                                  | 2010 | Case report of 1 patient |
| M. A. Bjurlin, V. Bhalani, M. D. Jordan, C. M. Hollowell                                                                                 | 2010 | Case report of 1 patient |
| O. Ciocca, C. Vassallo, V. Brazzelli, G. Fiandrino, R. Rosso, G. Borroni                                                                 | 2010 | Case report of 1 patient |
| S. Goyal, T. Puri, R. Gupta, V. Suri, P. K. Julka, G. K. Rath                                                                            | 2010 | Case report of 1 patient |
| A. C. van Akkooi, J. Dokter, H. Boxma                                                                                                    | 2010 | Case report of 1 patient |
| R. Rao, C. Balachandran, L. Rao                                                                                                          | 2010 | Case report of 1 patient |
| A. Wulff-Woesten, U. Hildebrandt, M. Leverkus, J. Ulrich                                                                                 | 2010 | Case report of 1 patient |
| S. V. Truong, L. C. Chang, T. G. Berger                                                                                                  | 2010 | Case report of 1 patient |
| E. Blochin, J. A. Stein, N. S. Wang                                                                                                      | 2010 | Case report of 1 patient |
| A. J. Karayiannakis, H. Bolanaki, C. Tsalikidis, C. Simopoulos                                                                           | 2010 | Case report of 1 patient |
| H. Kavgaci, B. Yildiz, U. Cobanoglu, E. Fidan, F. Ozdemir, F. Aydin                                                                      | 2010 | Case report of 1 patient |
| Z. Saladzinskas, A. Tamelis, S. Paskauskas, D. Pranys, D. Pavalkis                                                                       | 2010 | Case report of 1 patient |
| S. Matsushita, K. I. Tada, K. I. Kawahara, K. Kawai, T. Hashiguchi, I. Maruyama, T. Kanekura                                             | 2010 | Case report of 1 patient |
| O. A. Khan, D. F. Roses, V. Peck                                                                                                         | 2010 | Case report of 1 patient |
| M. C. Locatelli, A. Miedico, A. D'Antona, G. Longo, M. Maggioni, A. Maggioni, P. Tombolini, D. Tabiaddon                                 | 2010 | Case report of 1 patient |
| A. Rosich-Medina, S. S. Liau, A. Jah, E. Huguet, T. C. See, N. Jamieson, R. Praseedom                                                    | 2010 | Case report of 1 patient |
| S. Saglam, S. Ozbilen Kucucuk, N. Dagoglu, C. Turkmen, E. Yavuz, N. Ozturk                                                               | 2010 | Case report of 1 patient |
| S. Bhatia, S. Ng, S. C. Hodder                                                                                                           | 2010 | Case report of 1 patient |
| O. Bilgi, B. Karagoz, H. Cermik, O. Turken, E. G. Kandemir                                                                               | 2010 | Case report of 1 patient |
| O. H. Llaguna, P. Desai, A. B. Fender, D. C. Zedek, M. O. Meyers, B. H. O'Neil, L. A. Diaz, B. F. Calvo                                  | 2010 | Case report of 1 patient |
| E. Karagulle, E. Turk, H. Kiyici, E. Karadeli, G. Moray                                                                                  | 2010 | Case report of 1 patient |
| M. Rafi, M. A. Tunio, A. Hashmi                                                                                                          | 2010 | Case report of 1 patient |
| A. Rondina, L. L. Kohen, L. Scherschun, H. Kerr                                                                                          | 2010 | Case report of 1 patient |
| C. S. L. Muller, W. Tilgen, C. Pfohler, N. Graf                                                                                          | 2010 | Case report of 1 patient |
| H. Bolanaki, C. Tsalikidis, E. G. Tsalkidou, C. Simopoulos, A. J. Karayiannakis                                                          | 2010 | Case report of 1 patient |
| O. S. Sezen, G. Eraslan, T. Coskuner, D. Yavuzer, A. Bilici, S. Bilge, S. H. Keser, M. Gumus, S. Unver                                   | 2010 | Case report of 1 patient |
| A. Kumar, P. N. Dogra, M. C. Sharma                                                                                                      | 2010 | Case report of 1 patient |
| K. W. Lollar, C. A. Parker, B. D. Liess, J. Wieberg                                                                                      | 2010 | Case report of 1 patient |
| E. Dika, R. Balestri, S. Vaccari, P. A. Fanti, A. Patrizi                                                                                | 2010 | Case report of 1 patient |
| Y. Guray, C. Tuncel, Z. Sakaogullari, A. Boyaci, L. Birincioglu                                                                          | 2010 | Case report of 1 patient |
| H. Husein-ElAhmed, J. Aneiros-Fernandez, S. Arias-Santiago, R. Naranjo-Sintes                                                            | 2010 | Case report of 1 patient |
| V. Camacho, A. Rodriguez-Revuelto, A. Flotats, J. Duch, C. Artigas, I. Carrio, M. Estorch                                                | 2010 | Case report of 1 patient |
| A. Raj, A. Sayal, R. Meher, M. Girhotra, S. Jain                                                                                         | 2010 | Case report of 1 patient |
| K. Ussavarungsi, K. Nugent                                                                                                               | 2011 | Case report of 1 patient |
| R. Bussone, S. Bustreo, A. Ala, R. Cianci, S. Bevilacqua, G. Grilz, I. Castellano, M. Mistrangelo, G. Ritorto, A. M. Vandone, M. Donadio | 2011 | Case report of 1 patient |
| M. Asakura, H. Miura                                                                                                                     | 2011 | Case report of 1 patient |
| I. Botrugno, V. Jemos, L. Cobianchi, G. Fiandrino, S. Brugnattelli, V. Perfetti, A. Vercelli, M. Maestri, P. Dionigi                     | 2011 | Case report of 1 patient |
| G. Chen, W. Cheuk, J. S. Cheung, J. K. Chan                                                                                              | 2011 | Case report of 1 patient |
| M. Pantarotto, L. Lombo, H. Pereira, A. Araujo                                                                                           | 2011 | Case report of 1 patient |
| N. Kerkeni, B. Fazaa, N. Ezzine, F. Zeglou, M. R. Kamoun, N. Jaada,                                                                      | 2011 | Case report of 1 patient |

|                                                                                                                                                       |      |                          |
|-------------------------------------------------------------------------------------------------------------------------------------------------------|------|--------------------------|
| <b>M. A. Khedher, R. Zermani</b>                                                                                                                      |      |                          |
| <b>T. Razi, R. Yaghoobi, A. Feily, N. Jazayeri, S. Razi, M. Mohammadbeigi</b>                                                                         | 2011 | Case report of 1 patient |
| <b>A. Rattanasirivilai, A. Kurban, Y. M. Lenzy, R. Yaar</b>                                                                                           | 2011 | Case report of 1 patient |
| <b>N. S. Salemis, C. Gakis, A. Zografidis, S. Gourgiotis</b>                                                                                          | 2011 | Case report of 1 patient |
| <b>A. Chauhan, M. Ganguly, P. Nath, G. S. Chowdhary</b>                                                                                               | 2011 | Case report of 1 patient |
| <b>Y. Balagula, N. Jaimes-Lopez, K. J. Busam, E. A. Quigley</b>                                                                                       | 2011 | Case report of 1 patient |
| <b>M. Shahidi-Dadras, H. Rahimi</b>                                                                                                                   | 2011 | Case report of 1 patient |
| <b>B. Gazic, J. Pizem</b>                                                                                                                             | 2011 | Case report of 1 patient |
| <b>H. Onishi, T. Morisaki, Y. Nakafusa, Y. Nakashima, K. Yokohata, M. Katano</b>                                                                      | 2011 | Case report of 1 patient |
| <b>T. P. Elamurugan, A. Agrawal, R. Dinesh, R. Aravind, D. Naskar, V. Kate, R. Reddy, S. Elamurugan, D. Basu</b>                                      | 2011 | Case report of 1 patient |
| <b>B. Yildiz, E. Fidan, K. Yildiz, F. Aydin</b>                                                                                                       | 2011 | Case report of 1 patient |
| <b>F. Altintoprak, H. F. Baytekin, C. Tasdemir</b>                                                                                                    | 2011 | Case report of 1 patient |
| <b>G. C. Verardino, R. S. Silva, D. L. Obadia, A. C. Gripp, F. Alves Mde</b>                                                                          | 2011 | Case report of 1 patient |
| <b>R. P. Johnson, K. Krauland, N. M. Owens, S. Peckham</b>                                                                                            | 2011 | Case report of 1 patient |
| <b>A. Horiuchi, K. Nozawa, T. Akahane, R. Shimada, H. Shibuya, Y. Aoyagi, K. Nakamura, T. Hayama, H. Yamada, S. Ishihara, K. Matsuda, T. Watanabe</b> | 2011 | Case report of 1 patient |
| <b>L. Ballesio, I. D'Ambrosio, N. Ravazzolo, M. Angeletti, F. Di Pastena, S. Tardioli, P. Lodise, M. Marini</b>                                       | 2011 | Case report of 1 patient |
| <b>J. J. Park, Y. D. Choi, J. B. Lee, S. J. Kim, S. C. Lee, Y. H. Won, S. J. Yun</b>                                                                  | 2011 | Case report of 1 patient |
| <b>S. S. Chandanwale, C. R. Gore, A. C. Buch, S. S. Misal</b>                                                                                         | 2011 | Case report of 1 patient |
| <b>J. Eichinger, B. George, R. Myhand</b>                                                                                                             | 2011 | Case report of 1 patient |
| <b>B. Vijaya, S. Sunila, S. Veeranna, G. V. Manjunath</b>                                                                                             | 2011 | Case report of 1 patient |
| <b>G. C. Verardino, R. S. da Silva, D. L. Obadia, A. C. Gripp, M. F. G. S. Alves</b>                                                                  | 2011 | Case report of 1 patient |
| <b>M. I. Ragsdale, L. M. Lehmer, B. D. Ragsdale, W. A. Chow, R. T. Carson</b>                                                                         | 2011 | Case report of 1 patient |
| <b>Y. Tezcan, M. Koc</b>                                                                                                                              | 2011 | Case report of 1 patient |
| <b>M. C. Goris Gbenou, T. Wahidy, K. Llinares, D. Cracco, A. Perrot, D. Riquet</b>                                                                    | 2011 | Case report of 1 patient |
| <b>G. Avgerinou, I. Flessas, E. Hatzilou, G. Zografos, I. Nitsios, F. Zagouri, A. Katsambas, J. Kanitakis</b>                                         | 2011 | Case report of 1 patient |
| <b>R. S. Arora, D. S. Kalpana, A. S. B. Chauhan, R. P. Bhansali, J. D. Patel</b>                                                                      | 2011 | Case report of 1 patient |
| <b>C. Kouvidou, A. Nikolaidis, E. Ronne, I. Chrysovergis, G. Anastasiades, C. Vourlakou</b>                                                           | 2011 | Case report of 1 patient |
| <b>I. Jusue Torres, P. Jerez Fernandez, J. Ortega Zufiria, J. M. Rodriguez Barbero</b>                                                                | 2011 | Case report of 1 patient |
| <b>C. S. L. Muller, R. Korner, F. Z. Takacs, E. F. Solomayer, T. Vogt, C. Pfoehler</b>                                                                | 2011 | Case report of 1 patient |
| <b>A. Manzelli, S. Quresima, P. Rossi, A. Petrou, E. Ricciardi, N. Brennan, M. Kontos, G. Petrella</b>                                                | 2011 | Case report of 1 patient |
| <b>C. Bernigaud, B. Bel, M. H. Aubriot-Lorton, P. Vabres</b>                                                                                          | 2011 | Case report of 1 patient |
| <b>B. Aravind, P. S. Basnyat</b>                                                                                                                      | 2011 | Case report of 1 patient |
| <b>M. Tabassomi, H. Abdulhaq, E. Almasri, N. Hashemi</b>                                                                                              | 2011 | Case report of 1 patient |
| <b>T. Fujimura, M. Sugawara, T. Haga, Y. Kariya, R. Okuyama, H. Tagami, S. Aiba</b>                                                                   | 2011 | Case report of 1 patient |
| <b>H. S. Tseng, S. E. Chan, S. J. Kuo, D. R. Chen</b>                                                                                                 | 2011 | Case report of 1 patient |
| <b>H. Karabekir, C. Polat, F. Aktepe, N. Gocmen-Mas</b>                                                                                               | 2011 | Case report of 1 patient |
| <b>G. C. Tan, M. Noraidah, N. Hamidah Hussin, M. S. Shiran, B. C. Lee, T. Y. Kew</b>                                                                  | 2011 | Case report of 1 patient |
| <b>J. Jedrych, A. Galan</b>                                                                                                                           | 2011 | Case report of 1 patient |

|                                                                                                                                                |      |                          |
|------------------------------------------------------------------------------------------------------------------------------------------------|------|--------------------------|
| Y. K. Chew, J. P. Cheong, S. Brito-Mutunayagam, A. Khir, N. Prepageran, K. S. Mun                                                              | 2011 | Case report of 1 patient |
| M. W. Saif, M. Brennan, R. Penney, S. Hotchkiss, K. Kaley                                                                                      | 2011 | Case report of 1 patient |
| M. Kucukoner, M. A. Kaplan, A. Inal, B. Sula, U. Firat, F. Ucmak, A. Isikdogan                                                                 | 2011 | Case report of 1 patient |
| V. Chennamaneni, J. Dundulis, R. Gupta, A. Grewal                                                                                              | 2011 | Case report of 1 patient |
| M. Borgaonkar                                                                                                                                  | 2011 | Case report of 1 patient |
| D. Rajan, S. Rashid, S. Mujeeb, D. Kc, P. Mustacchia                                                                                           | 2011 | Case report of 1 patient |
| C. Uy, F. Jon, C. Rowsell, B. O'Hayon, S. Hanna, G. Bjarnason, L. Holden, J. Nguyen, M. Ross, J. Kwong, A. Sahgal, L. Khan, K. Dennis, E. Chow | 2011 | Case report of 1 patient |
| V. Elangasinghe, P. Da Forno, R. M. Burd                                                                                                       | 2011 | Case report of 1 patient |
| I. Puche-Sanz, F. Vazquez-Alonso, V. C. Lora, J. F. F. Martin, H. G. Julio, J. M. C. Olmo                                                      | 2011 | Case report of 1 patient |
| G. Macripo, V. Caliendo, M. Grassi, P. Lista, S. Ribero, E. Giacone, E. Milanese, L. Ciuffreda                                                 | 2011 | Case report of 1 patient |
| H. Lal, Z. Neyaz, V. K. Kapoor, B. Pottakkat, P. Gupta                                                                                         | 2011 | Case report of 1 patient |
| M. Ahmed                                                                                                                                       | 2011 | Case report of 1 patient |
| S. E. Cotter, G. P. Dunn, K. M. Collins, D. Sahni, K. A. Zukotynski, J. L. Hansen, D. A. O'Farrell, A. K. Ng, P. M. Devlin, L. C. Wang         | 2011 | Case report of 1 patient |
| M. R. Robinson, K. S. Honda, J. S. Bordeaux                                                                                                    | 2011 | Case report of 1 patient |
| V. Nikolaou, A. Stratigos, K. Frangia, I. Nikolaidis, K. Syrigos                                                                               | 2011 | Case report of 1 patient |
| G. G. Simsek, A. S. Karadag, Z. Turksen                                                                                                        | 2011 | Case report of 1 patient |
| A. K. Boysen, V. Haarh, G. Soendergaard, M. K. Yilmaz                                                                                          | 2011 | Case report of 1 patient |
| J. A. Mandell, B. E. Tlougan, R. R. Patel, M. A. Warycha, H. Kamino, K. J. Haglof                                                              | 2011 | Case report of 1 patient |
| J. Mailhot, P. Odonnell, R. Han, S. Zweizig, D. E. Geist                                                                                       | 2011 | Case report of 1 patient |
| D. Meyer                                                                                                                                       | 2011 | Case report of 1 patient |
| D. Dincer, M. Tunca, A. Akar, B. Kurt                                                                                                          | 2011 | Case report of 1 patient |
| J. M. Moriarty, M. Xing, C. T. Loh                                                                                                             | 2012 | Case report of 1 patient |
| M. A. Alvarez, E. Casas, J. Ruano, A. Velez, J. Salvatierra, J. C. Moreno                                                                      | 2012 | Case report of 1 patient |
| J. W. Trufant, L. Greene, D. L. Cook, W. McKinnon, M. Greenblatt, M. W. Bosenberg                                                              | 2012 | Case report of 1 patient |
| R. M. Alonso de Celada, P. Maldonado Cid, M. J. Beato, P. Herranz Pinto                                                                        | 2012 | Case report of 1 patient |
| A. Dzever, Z. J. Daruwalla, M. Arumugasamy, L. Grogan, P. Broe                                                                                 | 2012 | Case report of 1 patient |
| I. Balta, G. Vahaboglu, A. A. Karabulut, F. Yetisir, M. Astarci, E. Gungor, M. Eksioglu                                                        | 2012 | Case report of 1 patient |
| N. M. Isa, J. J. Bong, F. A. Ghani, I. M. Rose, S. Husain, M. Azrif                                                                            | 2012 | Case report of 1 patient |
| H. R. Mahmoudi, K. Kamyab, M. Daneshpazhooh                                                                                                    | 2012 | Case report of 1 patient |
| B. Geramizadeh, H. Rad                                                                                                                         | 2012 | Case report of 1 patient |
| M. S. Rauf, L. Motta, C. Connolly                                                                                                              | 2012 | Case report of 1 patient |
| D. Relles, Z. Fong, R. Burkhart, P. J. Maxwell                                                                                                 | 2012 | Case report of 1 patient |
| A. Narasimha, H. Kumar                                                                                                                         | 2012 | Case report of 1 patient |
| G. R. Collins, L. Essary, J. Strauss, P. Hino, C. J. Cockerell                                                                                 | 2012 | Case report of 1 patient |
| S. Corcoran, A. M. Hogan, T. Nemeth, F. Bennani, F. J. Sullivan, W. Khan, K. Barry                                                             | 2012 | Case report of 1 patient |
| A. M. Harrison, B. Zendejas, S. M. Ali, J. S. Scow, D. R. Farley                                                                               | 2012 | Case report of 1 patient |
| J. Hau, L. Diaz, T. Paravar, S. Chon                                                                                                           | 2012 | Case report of 1 patient |
| S. Gaba, P. Chopra, P. Pankaj, E. S. Belho, A. B. Qadri, S. Aggarwal                                                                           | 2012 | Case report of 1 patient |
| T. Noro, H. Ohdaira, R. Takizawa, N. Kawasaki, M. Kitajima, Y. Suzuki                                                                          | 2012 | Case report of 1 patient |
| J. Kaur, N. Sharma, S. Sharma                                                                                                                  | 2012 | Case report of 1 patient |
| G. L. Fekete, O. S. Cotoi, J. E. Fekete                                                                                                        | 2012 | Case report of 1 patient |
| K. Schulmann, K. Strate, C. P. Pox, U. Wieland, A. Kreuter                                                                                     | 2012 | Case report of 1 patient |

|                                                                                                                                                                                             |      |                          |
|---------------------------------------------------------------------------------------------------------------------------------------------------------------------------------------------|------|--------------------------|
| H. K. Kim, K. I. Chung, B. Y. Park, T. H. Bae, W. S. Kim, T. J. Lee                                                                                                                         | 2012 | Case report of 1 patient |
| E. B. Petcu, A. Gonzalez-Serva, R. G. Wright, M. Slevin, K. Brinzaniuc                                                                                                                      | 2012 | Case report of 1 patient |
| D. Kolarevic, Z. Tomasevic, I. Markovic, M. Zegarac, G. Pupic                                                                                                                               | 2012 | Case report of 1 patient |
| S. Davar, D. Hanna                                                                                                                                                                          | 2012 | Case report of 1 patient |
| P. Fino, P. Fioramonti, M. G. Onesti, D. Passaretti, N. Scuderi                                                                                                                             | 2012 | Case report of 1 patient |
| T. Yoshida, H. Takayama, M. Uemura, Y. Nakai, N. Nonomura, A. Tsujimura                                                                                                                     | 2012 | Case report of 1 patient |
| D. Yamamoto, T. Inui, Y. Tsubota, N. Sueoka, C. Yamamoto, K. Kuwana, M. Yamamoto                                                                                                            | 2012 | Case report of 1 patient |
| W. H. Li, C. Y. Tu, T. C. Hsieh, P. Y. Wu                                                                                                                                                   | 2012 | Case report of 1 patient |
| A. M. Mansour, R. Alameddine                                                                                                                                                                | 2012 | Case report of 1 patient |
| T. Ando, T. Ishikawa, E. Imamoto, E. Kishimoto, K. Suzuki, Y. Isozaki, N. Matsumoto, H. Oyamada, T. Matsumoto, K. Uchiyama, O. Handa, T. Takagi, N. Yagi, S. Kokura, Y. Naito, T. Yoshikawa | 2012 | Case report of 1 patient |
| C. Wootton, H. Trinh, J. Bong                                                                                                                                                               | 2012 | Case report of 1 patient |
| V. Kremer, A. Kremer, K. Baldwin, S. Sirsi, A. Rafiaa                                                                                                                                       | 2012 | Case report of 1 patient |
| L. Lester, S. Hymes                                                                                                                                                                         | 2012 | Case report of 1 patient |
| J. Ul-Mulk, H. Rasmussen, L. Breiting, E. Siim                                                                                                                                              | 2012 | Case report of 1 patient |
| A. Pai, H. S. Shankar Ram, T. Sarkar, S. Bhat, A. Mohammed                                                                                                                                  | 2012 | Case report of 1 patient |
| H. B. Govardhan, R. Singh, A. Shaleen, S. Pradhan, C. Sunil, U. P. Shahi                                                                                                                    | 2012 | Case report of 1 patient |
| T. Hofer, A. Wodzynski, W. Kempf                                                                                                                                                            | 2012 | Case report of 1 patient |
| L. Zachau, C. Zeckey, J. Schlue, J. Sander, C. Meyer-Heithuis, M. Winkler, J. Klempnauer, H. Schrem                                                                                         | 2012 | Case report of 1 patient |
| G. Kerry, O. Marx, D. Kraus, M. Vogel, A. Kaiser, C. Ruedinger, H. H. Steiner                                                                                                               | 2012 | Case report of 1 patient |
| P. R. O. Fontes, U. F. Teixeira, F. L. Weachter, J. A. Sampaio, R. Furian                                                                                                                   | 2012 | Case report of 1 patient |
| P. Priester, J. Kopecky, J. Prosvicova, J. Petera, Z. Zoul, L. Slovacek                                                                                                                     | 2012 | Case report of 1 patient |
| M. K. Kim, S. H. Kim, Y. Y. Lee, C. H. Choi, T. J. Kim, J. W. Lee, J. H. Lee, D. S. Bae, B. G. Kim                                                                                          | 2012 | Case report of 1 patient |
| D. Rajan, M. Shah, P. Raghavan, S. Mujeeb, S. Rashid, A. Desouza, P. Mustacchia                                                                                                             | 2012 | Case report of 1 patient |
| A. Dirican, Y. Kucukzeybek, I. Somali, C. Erten, L. Demir, A. Can, I. V. Bayoglu, M. Ermete, A. A. Altinboga, M. O. Tarhan                                                                  | 2012 | Case report of 1 patient |
| B. H. Durham, X. S. Liu, T. Fagen, D. Ritter, O. Jassim                                                                                                                                     | 2012 | Case report of 1 patient |
| B. Barrick, B. Matthys, G. Fraga                                                                                                                                                            | 2012 | Case report of 1 patient |
| J. Sun, Q. Gao, V. T. W. Fan                                                                                                                                                                | 2012 | Case report of 1 patient |
| H. Yilmaz, H. Alptekin, M. Sahin, F. Acar, M. Ertugrul Kafali                                                                                                                               | 2012 | Case report of 1 patient |
| J. S. Torres, A. C. Amorim, F. M. Hercules, B. K. Kac                                                                                                                                       | 2012 | Case report of 1 patient |
| S. Kumar, D. Singh, M. M. Goel, J. K. Kushwaha                                                                                                                                              | 2012 | Case report of 1 patient |
| J. I. Kim, C. H. Song, H. S. Gong                                                                                                                                                           | 2012 | Case report of 1 patient |
| M. Gawlak, M. Kowalewska, R. Krynicki, A. Danska-Bidzinska                                                                                                                                  | 2012 | Case report of 1 patient |
| G. Lo Russo, F. Accarpio, G. P. Spinelli, E. Miele, F. Borrini, L. Cerbone, V. Stati, N. Prinzi, M. Strudel, S. Sibio, S. Tomao                                                             | 2012 | Case report of 1 patient |
| J. Hachisuka, K. Doi, M. Furue                                                                                                                                                              | 2012 | Case report of 1 patient |
| A. Dhebri, N. Shah, R. Sripadam, P. K. Arora                                                                                                                                                | 2012 | Case report of 1 patient |
| Y. M. Park, H. S. Kim, J. Y. Lee, H. O. Kim                                                                                                                                                 | 2012 | Case report of 1 patient |
| I. Arikan, A. Barut, M. Harma, M. I. Harma, Z. Erdem, S. Gezer                                                                                                                              | 2012 | Case report of 1 patient |
| S. Gungor, G. Gokdemir, N. Tarikci, T. Sayilgan, S. Bek                                                                                                                                     | 2012 | Case report of 1 patient |
| T. Yamaguchi, H. Sano, T. Suzuki, H. Makino, K. Oohashi, M. Okamoto                                                                                                                         | 2012 | Case report of 1 patient |
| D. He, J. Zeng, X. Li, K. Wu, D. Wu, H. He, W. Song, L. Li                                                                                                                                  | 2012 | Case report of 1 patient |
| I. Prieto, L. Gonzalez-Cortijo, J. F. Garcia                                                                                                                                                | 2012 | Case report of 1 patient |
| A. Balavenkataraman, D. Sanghavi, B. Lee, M. Ahmed, N. Bucher, F. Khan                                                                                                                      | 2012 | Case report of 1 patient |

|                                                                                                                     |      |                          |
|---------------------------------------------------------------------------------------------------------------------|------|--------------------------|
| A. Mandal, Y. Littler, G. Libertiny                                                                                 | 2012 | Case report of 1 patient |
| B. Fariba, A. Ali, K. Parichehr, N. Hossein                                                                         | 2012 | Case report of 1 patient |
| J. Y. Kwak, J. E. Oh, K. M. Kim, H. C. Cho, C. U. Jung, D. H. Cho, K. J. Yu, S. G. Shim                             | 2012 | Case report of 1 patient |
| S. Poovaneswaran, V. Paleri, F. Charlton, W. Dobrowsky, C. Kelly                                                    | 2012 | Case report of 1 patient |
| A. Lamarca, V. Martinez-Marin, J. Feliu                                                                             | 2012 | Case report of 1 patient |
| A. Kapadia, P. Rao, S. Edward, G. I. Stables                                                                        | 2012 | Case report of 1 patient |
| H. L. Liu, J. Y. W. Chan                                                                                            | 2012 | Case report of 1 patient |
| F. Kamangar, T. McCalmont, K. Shinkai                                                                               | 2012 | Case report of 1 patient |
| D. J. Papachristou, M. Goodman, K. Cieply, U. N. M. Rao                                                             | 2012 | Case report of 1 patient |
| D. Bayramgurler, E. O. Demirsoy, N. Doan, K. Yldz, Z. Utkan                                                         | 2012 | Case report of 1 patient |
| A. C. Wiechert, L. A. Garrett, G. Lin, A. Goodman                                                                   | 2012 | Case report of 1 patient |
| H. J. Lee, D. H. Shin, J. S. Choi, K. H. Kim                                                                        | 2012 | Case report of 1 patient |
| Y. T. Chuang, K. Y. Than, M. Y. Choong, T. S. Li                                                                    | 2012 | Case report of 1 patient |
| C. L. Anzalone, P. R. Cohen, M. R. Migden, N. M. Tannir                                                             | 2013 | Case report of 1 patient |
| N. Hauptmann, S. Schafer, A. Hauschild, K. C. Kahler                                                                | 2013 | Case report of 1 patient |
| A. D. Somoza, H. Bui, S. Samaan, R. Dhanda-Patil, D. F. Mutasim                                                     | 2013 | Case report of 1 patient |
| R. Bognet, C. Thompson, C. Campanelli                                                                               | 2013 | Case report of 1 patient |
| C. Kaoutzannis, M. C. Chang, F. J. Abdul Khalek, E. Kreske                                                          | 2013 | Case report of 1 patient |
| J. Levin, L. Ogden, B. Karnath                                                                                      | 2013 | Case report of 1 patient |
| N. S. Kutlu Haytoglu, M. S. Gurel, V. A. Erdemir, C. Leblebici, T. G. Haytoglu                                      | 2013 | Case report of 1 patient |
| S. H. Song, B. S. Shin, C. H. Na, K. C. Choi, M. S. Kim                                                             | 2013 | Case report of 1 patient |
| L. Pagano, M. Caputo, M. T. Sama, M. Zavattaro, F. Prodam, M. G. Mauri, F. Pia, A. Alonzo, G. Valente, G. Aimaretti | 2013 | Case report of 1 patient |
| J. H. Chung, J. Y. Lee, J. Y. Pyo, Y. H. Oh, S. W. Lee, H. S. Moon, H. Y. Choi                                      | 2013 | Case report of 1 patient |
| R. S. Chan, G. Kumar, A. A. P. Vijayananthan                                                                        | 2013 | Case report of 1 patient |
| A. Volleamere                                                                                                       | 2013 | Case report of 1 patient |
| N. A. Richmond, M. H. Viera, J. Velazquez-Vega, F. A. Kerdel                                                        | 2013 | Case report of 1 patient |
| D. K. Gupta, A. Goel, S. Sankhwar, D. Dalela                                                                        | 2013 | Case report of 1 patient |
| B. Aravind, R. Kumar, P. Basnyat                                                                                    | 2013 | Case report of 1 patient |
| X. G. Ma, Y. M. Wang, H. N. Sheng, Z. Qi, W. Y. Tian, G. Y. Liu, F. X. Xue                                          | 2013 | Case report of 1 patient |
| M. Shindo, Y. Yoshida, K. Tominaga, O. Yamamoto                                                                     | 2013 | Case report of 1 patient |
| P. Jeyaraj, T. T. Sio, M. J. Iott                                                                                   | 2013 | Case report of 1 patient |
| M. Kairouani, J. Perrin, A. Dietemann-Barabinot, R. Diab, S. Ruck                                                   | 2013 | Case report of 1 patient |
| S. Poovaneswaran, Z. E. J. Lee, W. Y. Lim, N. S. Raja Gopal, F. M. Dali, I. Mohamad                                 | 2013 | Case report of 1 patient |
| G. Feldmann, P. Brossart, M. Zipfel, M. Von Lilienfeld-Toal                                                         | 2013 | Case report of 1 patient |
| J. L. Vitorino-Araujo, J. C. E. Veiga, V. R. Barboza, N. D. Souza, D. Mayrink, R. F. Nadais, E. G. Figueiredo       | 2013 | Case report of 1 patient |
| S. Verma, T. Kaur, R. Verma, S. Dhawan                                                                              | 2013 | Case report of 1 patient |
| A. S. Fernando, R. Rattan, S. R. J. Bott                                                                            | 2013 | Case report of 1 patient |
| V. Kravtsov, A. Fishman, I. Bruchim, S. Olsfanger, L. Elbaum, D. Kidron                                             | 2013 | Case report of 1 patient |
| J. Pedraz, A. Conde-Taboada, A. Fueyo-Casado, E. Lopez-Bran, L. Campos-Munoz                                        | 2013 | Case report of 1 patient |
| J. Hafiji, E. Rytina, P. Jani, N. P. Burrows                                                                        | 2013 | Case report of 1 patient |
| R. Van Ginderdeuren, G. S. Missotten, J. Van Den Oord                                                               | 2013 | Case report of 1 patient |
| F. Abbasi, M. Alizadeh, F. Noroozinia, A. Moradi                                                                    | 2013 | Case report of 1 patient |
| J. D. Kemfang Ngowa, E. Bechem, J. Yomi, J. M. Kasia, A. Kabeyene                                                   | 2013 | Case report of 1 patient |
| T. Tran, D. Burt, L. Eapen, O. R. Keller                                                                            | 2013 | Case report of 1 patient |
| M. Yilmaz, M. Is, E. Celikoglu, I. Kiraz, D. Yavuzer                                                                | 2013 | Case report of 1 patient |
| L. Prat, C. Chouaid, A. Kettaneh, L. Fardet                                                                         | 2013 | Case report of 1 patient |
| K. Namikawa, N. Yamazaki                                                                                            | 2013 | Case report of 1 patient |

|                                                                                                                                                                                                                                                                                          |      |                          |
|------------------------------------------------------------------------------------------------------------------------------------------------------------------------------------------------------------------------------------------------------------------------------------------|------|--------------------------|
| H. Miyachi, K. Tanaka, K. Mizuno                                                                                                                                                                                                                                                         | 2013 | Case report of 1 patient |
| T. Funakoshi, K. Visnyei, M. Yabe, P. Kozuch                                                                                                                                                                                                                                             | 2013 | Case report of 1 patient |
| D. Wallace, S. Hussain, S. Singh                                                                                                                                                                                                                                                         | 2013 | Case report of 1 patient |
| Y. Endo, R. Matsumoto, R. Taki, K. I. Toda                                                                                                                                                                                                                                               | 2013 | Case report of 1 patient |
| K. Bdeiri, F. G. Kamar                                                                                                                                                                                                                                                                   | 2013 | Case report of 1 patient |
| C. D. Craig, D. A. Iglesias, J. Watkins, R. L. Coleman, L. Kilgore, P. T. Ramirez                                                                                                                                                                                                        | 2013 | Case report of 1 patient |
| D. T. Ginat, H. R. Kelly, P. W. Schaefer, C. J. Davidson, W. Curry                                                                                                                                                                                                                       | 2013 | Case report of 1 patient |
| B. Falck, S. Jacobson, H. Olivecrona, H. Rorsman                                                                                                                                                                                                                                         | 1966 | Entirely off topic       |
| H. Baudach, E. Magdon                                                                                                                                                                                                                                                                    | 1967 | Entirely off topic       |
| G. K. Klintworth, B. F. Fetter, H. S. Nielsen, Jr.                                                                                                                                                                                                                                       | 1968 | Entirely off topic       |
| J. A. Fleming                                                                                                                                                                                                                                                                            | 1968 | Entirely off topic       |
| N. duV Tapley, G. H. Fletcher                                                                                                                                                                                                                                                            | 1969 | Entirely off topic       |
| G. Swanbeck, L. Hillstrom                                                                                                                                                                                                                                                                | 1970 | Entirely off topic       |
| F. R. Khan, J. F. Bohorquez, J. Ovadia, J. J. Nickson                                                                                                                                                                                                                                    | 1970 | Entirely off topic       |
| J. P. Tindall, B. F. Fetter                                                                                                                                                                                                                                                              | 1971 | Entirely off topic       |
| F. Ellis                                                                                                                                                                                                                                                                                 | 1971 | Entirely off topic       |
| M. L. Geerts, A. Elewaut, A. Kint, G. Speelman                                                                                                                                                                                                                                           | 1972 | Entirely off topic       |
| K. Kett, I. Kadas, L. Tabar, L. Lukacs                                                                                                                                                                                                                                                   | 1972 | Entirely off topic       |
| C. M. Mansfield, N. Suntharalingam, D. B. Leeper, S. Kramer                                                                                                                                                                                                                              | 1973 | Entirely off topic       |
| E. Engelsman, C. B. Korsten, J. P. Persijn, F. J. Cleton                                                                                                                                                                                                                                 | 1973 | Entirely off topic       |
| G. R. Paul, C. Craig, H. H. Banks                                                                                                                                                                                                                                                        | 1973 | Entirely off topic       |
| V. J. McGovern, M. C. Mihm, Jr., C. Bailly, J. C. Booth, W. H. Clark, Jr., A. J. Cochran, E. G. Hardy, J. D. Hicks, A. Levene, M. G. Lewis, J. H. Little, G. W. Milton                                                                                                                   | 1973 | Entirely off topic       |
| Z. Y. Fuks, R. A. Castellino, J. A. Carmel, E. M. Farber, M. A. Bagshaw                                                                                                                                                                                                                  | 1974 | Entirely off topic       |
| E. N. Kaplan                                                                                                                                                                                                                                                                             | 1974 | Entirely off topic       |
| R. S. Bush                                                                                                                                                                                                                                                                               | 1975 | Entirely off topic       |
| S. Brosman, M. Hausman, S. J. Shacks                                                                                                                                                                                                                                                     | 1975 | Entirely off topic       |
| E. R. Fisher, R. M. Gregorio, B. Fisher, C. Redmond, F. Vellios, S. C. Sommers                                                                                                                                                                                                           | 1975 | Entirely off topic       |
| L. Liskowski, D. P. Rose                                                                                                                                                                                                                                                                 | 1976 | Entirely off topic       |
| A. Akanuma                                                                                                                                                                                                                                                                               | 1976 | Entirely off topic       |
| J. P. Gerard, P. Noel, M. Mayer, C. Bailly, R. Blondet, J. Y. Bobin, J. Colon, P. Deglise                                                                                                                                                                                                | 1977 | Entirely off topic       |
| T. Bates                                                                                                                                                                                                                                                                                 | 1977 | Entirely off topic       |
| U. Veronesi, J. Adamus, D. C. Bandiera, I. O. Brennhovd, E. Caceres, N. Cascinelli, F. Claudio, R. L. Ikonopisov, V. V. Javorskij, S. Kirov, A. Kulakowski, J. Lacoub, F. Lejeune, Z. Mechl, A. Morabito, I. Rodé, S. Sergeev, E. Slooten, K. Szczygiel, N. N. Trapeznikov               | 1977 | Entirely off topic       |
| U. Veronesi, A. Banfi, R. Saccozzi, B. Salvadori, R. Zucali, C. Uslenghi, M. Greco, A. Luini, F. Rilke, L. Sultan                                                                                                                                                                        | 1977 | Entirely off topic       |
| U. Veronesi, R. Saccozzi, M. Greco, A. Luini, L. Sultan                                                                                                                                                                                                                                  | 1977 | Entirely off topic       |
| J. Lacour, J. Y. Petit, H. Sancho                                                                                                                                                                                                                                                        | 1978 | Entirely off topic       |
| K. T. Yamaguchi, M. S. Strong, S. M. Shapshay, E. Soto                                                                                                                                                                                                                                   | 1979 | Entirely off topic       |
| W. B. Patterson                                                                                                                                                                                                                                                                          | 1979 | Entirely off topic       |
| L. A. deSantos, J. A. Murray, A. G. Ayala                                                                                                                                                                                                                                                | 1979 | Entirely off topic       |
| K. A. Rickard, J. L. Grosfeld, A. Kirksey, T. V. Ballantine, R. L. Baehner                                                                                                                                                                                                               | 1979 | Entirely off topic       |
| E. Paul                                                                                                                                                                                                                                                                                  | 1980 | Entirely off topic       |
| L. C. Tao, F. G. Pearson, N. C. Delarue, B. Langer, D. E. Sanders                                                                                                                                                                                                                        | 1980 | Entirely off topic       |
| U. Veronesi, J. Adamus, D. C. Bandiera, I. O. Brennhovd, E. Caceres, N. Cascinelli, F. Claudio, R. L. Ikonopisov, V. V. Javorskij, S. Kirov, A. Kulakowski, J. Lacour, F. Lejeune, Z. Mechl, A. Morabito, I. Rodé, S. Sergeev, E. Slooten, K. Szczygiel, N. N. Trapeznikov, R. I. Wagner | 1980 | Entirely off topic       |

|                                                                                                                                                                                                                                                                                      |      |                    |
|--------------------------------------------------------------------------------------------------------------------------------------------------------------------------------------------------------------------------------------------------------------------------------------|------|--------------------|
| U. Veronesi, J. Adamus, D. C. Bandiera, O. Brennhovd, E. Caceres, N. Cascinelli, F. Claudio, R. L. Ikonopisov, V. V. Javorski, S. Kirov, A. Kulakowski, J. Lacour, F. Lejeune, Z. Mechl, A. Morabito, I. Rodé, S. Sergeev, E. Slooten, K. Szczygiel, N. N. Trapeznikov, R. I. Wagner | 1982 | Entirely off topic |
| T. Morishima, N. Nagashima                                                                                                                                                                                                                                                           | 1983 | Entirely off topic |
| A. Akanuma                                                                                                                                                                                                                                                                           | 1983 | Entirely off topic |
| J. M. Kirkwood, D. R. Vlock                                                                                                                                                                                                                                                          | 1984 | Entirely off topic |
| R. Jackson                                                                                                                                                                                                                                                                           | 1984 | Entirely off topic |
| P. J. Shorvon, J. W. C. Leung, M. Corcoran                                                                                                                                                                                                                                           | 1984 | Entirely off topic |
| G. F. Murphy                                                                                                                                                                                                                                                                         | 1984 | Entirely off topic |
| N. S. Penneys                                                                                                                                                                                                                                                                        | 1985 | Entirely off topic |
| C. M. Sutherland, F. J. Mather                                                                                                                                                                                                                                                       | 1985 | Entirely off topic |
| J. Luande, C. I. Henschke, N. Mohammed                                                                                                                                                                                                                                               | 1985 | Entirely off topic |
| S. Ikeda, H. Esumi, T. Suzuki, Y. Tomita                                                                                                                                                                                                                                             | 1985 | Entirely off topic |
| C. Burtin, C. Noirot, C. Giroux, P. Scheinmann                                                                                                                                                                                                                                       | 1986 | Entirely off topic |
| L. Cutherell, H. J. Wanebo, C. J. Tegtmeier                                                                                                                                                                                                                                          | 1986 | Entirely off topic |
| F. H. Sim, W. F. Taylor, D. J. Pritchard, E. H. Soule                                                                                                                                                                                                                                | 1986 | Entirely off topic |
| H. Onodera, M. Oikawa, M. Abe, N. Chida, S. Kimura, K. Satake, T. Motojima, Y. Goto                                                                                                                                                                                                  | 1987 | Entirely off topic |
| C. M. Sutherland, F. J. Mather, E. T. Kremenz                                                                                                                                                                                                                                        | 1987 | Entirely off topic |
| M. K. Leivonen                                                                                                                                                                                                                                                                       | 1987 | Entirely off topic |
| S. Marks, D. R. Radin, P. Chandrasoma                                                                                                                                                                                                                                                | 1987 | Entirely off topic |
| E. Henze, R. Kübel, J. Waitzinger, M. Büchler, W. E. Adam, H. G. Beger                                                                                                                                                                                                               | 1987 | Entirely off topic |
| M. S. Piver, V. Vongtama, L. J. Emrich                                                                                                                                                                                                                                               | 1987 | Entirely off topic |
| M. Bergenfeldt, S. Genell, K. Lindholm, O. Ekberg, P. Aspelin                                                                                                                                                                                                                        | 1988 | Entirely off topic |
| U. Pastorino, E. Soresi, M. Clerici, G. Chiesa, P. A. Belloni, M. Ongari, M. Valente, G. Ravasi                                                                                                                                                                                      | 1988 | Entirely off topic |
| P. J. Thomas, M. Stott, G. T. Royle                                                                                                                                                                                                                                                  | 1989 | Entirely off topic |
| M. Piver, M. Khalil, L. J. Emrich                                                                                                                                                                                                                                                    | 1989 | Entirely off topic |
| F. Karam, S. Schaefer, D. Cherryholmes, F. J. Dagher                                                                                                                                                                                                                                 | 1990 | Entirely off topic |
| M. Munzarova, Z. Mechl, A. Rejthar, V. Kolcova                                                                                                                                                                                                                                       | 1990 | Entirely off topic |
| K. Sasajima, M. Watanabe, T. Ando, K. Hao, M. Miyashita, K. Yamashita, M. Onda, K. Takubo                                                                                                                                                                                            | 1990 | Entirely off topic |
| J. M. Bachaud, D. Mazabrey, A. Berrebi, V. Maisongrosse                                                                                                                                                                                                                              | 1990 | Entirely off topic |
| J. K. Baum, A. J. Levine, J. A. Ingold                                                                                                                                                                                                                                               | 1990 | Entirely off topic |
| N. G. P. Davidson                                                                                                                                                                                                                                                                    | 1990 | Entirely off topic |
| P. E. Swanson, G. Mazoujian, S. E. Mills, R. J. Campbell, M. R. Wick                                                                                                                                                                                                                 | 1991 | Entirely off topic |
| S. Miura, M. Yoshida, H. Murai, J. L. Hayward, M. A. Chaudary                                                                                                                                                                                                                        | 1991 | Entirely off topic |
| G. S. Rogers                                                                                                                                                                                                                                                                         | 1991 | Entirely off topic |
| F. P. McGrath, R. G. Gibney, V. A. Rowley, C. H. Scudamore                                                                                                                                                                                                                           | 1991 | Entirely off topic |
| F. Drouard, J. Delamarre, J. P. Capron                                                                                                                                                                                                                                               | 1991 | Entirely off topic |
| H. M. Shaw, J. K. Rivers, S. W. McCarthy, W. H. McCarthy                                                                                                                                                                                                                             | 1992 | Entirely off topic |
| J. Izumi, Y. Hirose, T. Yazaki                                                                                                                                                                                                                                                       | 1992 | Entirely off topic |
| O. Goletti, F. De Negri, M. Pucciarelli, F. Sidoti, A. Bertolucci, M. Chiarugi, M. Seccia                                                                                                                                                                                            | 1992 | Entirely off topic |
| P. R. Cohen, S. R. Hymes                                                                                                                                                                                                                                                             | 1992 | Entirely off topic |
| C. L. Slingluff Jr, R. K. Dodge, W. E. Stanley, H. F. Seigler                                                                                                                                                                                                                        | 1992 | Entirely off topic |
| A. Nordkvist, S. Edstrom, J. Mark, G. Stenman                                                                                                                                                                                                                                        | 1992 | Entirely off topic |
| E. A. M. Fleer                                                                                                                                                                                                                                                                       | 1992 | Entirely off topic |
| R. Srinivasan, R. Ray, R. Nijhawan                                                                                                                                                                                                                                                   | 1993 | Entirely off topic |
| D. J. Ruiter, R. O. Schlingemann, J. R. Westphal, M. Denijn, F. J. Rietveld, R. M. De Waal                                                                                                                                                                                           | 1993 | Entirely off topic |
| M. R. Wick, J. Fitzgibbon, P. E. Swanson                                                                                                                                                                                                                                             | 1993 | Entirely off topic |
| C. V. Reyes, J. A. Jensen, A. M. Eng                                                                                                                                                                                                                                                 | 1993 | Entirely off topic |
| P. G. Natali, M. R. Nicotra, A. Bartolazzi, R. Cavaliere, A. Bigotti                                                                                                                                                                                                                 | 1993 | Entirely off topic |



|                                                                                                                                                                                                                                                              |      |                    |
|--------------------------------------------------------------------------------------------------------------------------------------------------------------------------------------------------------------------------------------------------------------|------|--------------------|
| E. R. Fisher, J. Costantino, B. Fisher, C. Redmond                                                                                                                                                                                                           | 1993 | Entirely off topic |
| S. Hundahl                                                                                                                                                                                                                                                   | 1993 | Entirely off topic |
| C. A. Rubio, E. Munck-Wikland                                                                                                                                                                                                                                | 1993 | Entirely off topic |
| A. Siriwardena, W. N. Samarji                                                                                                                                                                                                                                | 1993 | Entirely off topic |
| M. Detmar, C. C. Geilen, T. Wieder, C. E. Orfanos, W. Reutter                                                                                                                                                                                                | 1994 | Entirely off topic |
| H. Boukerche, M. Benchaibi, O. Berthier-Vergnes, G. Lizard, M. Bailly, M. Bailly, J. L. McGregor                                                                                                                                                             | 1994 | Entirely off topic |
| S. I. Yamashita, J. I. Yamashita, M. Ogawa                                                                                                                                                                                                                   | 1994 | Entirely off topic |
| V. Bjornhagen, E. Bonfoco, E. M. Brahme, J. Lindholm, G. Auer                                                                                                                                                                                                | 1994 | Entirely off topic |
| M. Ebina, S. M. Steinberg, J. L. Mulshine, R. I. Linnola                                                                                                                                                                                                     | 1994 | Entirely off topic |
| C. A. Upright, C. Salton, F. Roberts, J. Murphy                                                                                                                                                                                                              | 1994 | Entirely off topic |
| S. S. Kroll, M. Tavollali, J. Castello-Sendra, R. E. Pollock                                                                                                                                                                                                 | 1994 | Entirely off topic |
| R. E. Galardy, M. E. Cassabonne, C. Giese, J. H. Gilbert, F. Lapierre, H. Lopez, M. E. Schaefer, R. Stack, M. Sullivan, B. Summers, R. Tressler, D. Tyrrell, J. Wee, S. D. Allen, J. J. Castellot, J. P. Barletta, G. S. Schultz, L. A. Fernandez, S. Fisher | 1994 | Entirely off topic |
| L. F. Morris, P. R. Cohen, L. G. Dodd                                                                                                                                                                                                                        | 1994 | Entirely off topic |
| E. Campora, C. Simoni, R. Rosso                                                                                                                                                                                                                              | 1994 | Entirely off topic |
| K. V. Zhuravlev, A. S. Barchuk, R. I. Vagner, V. V. Anisimov                                                                                                                                                                                                 | 1994 | Entirely off topic |
| S. Egyhazi, J. Hansson, U. Ringborg                                                                                                                                                                                                                          | 1995 | Entirely off topic |
| L. B. Ostezan, V. C. Fabre, S. W. Caughman, R. A. Swerlick, N. J. Korman, J. P. Callen                                                                                                                                                                       | 1995 | Entirely off topic |
| Z. Yuan, A. Davis, K. Macdonald, R. R. Bailey                                                                                                                                                                                                                | 1995 | Entirely off topic |
| C. Muller, A. Le Pape, M. Musset, J. L. Baulieu, A. Delarue, H. Binz, L. Vaillant, G. Lorette                                                                                                                                                                | 1995 | Entirely off topic |
| A. A. I. Daffada, S. R. D. Johnston, I. E. Smith, S. Detre, N. King, M. Dowsett                                                                                                                                                                              | 1995 | Entirely off topic |
| C. S. Potten, P. A. Burt, S. A. Roberts, N. A. Deshpande, P. C. Williams, J. Ramsden                                                                                                                                                                         | 1996 | Entirely off topic |
| M. L. Wallace, B. R. Smoller                                                                                                                                                                                                                                 | 1996 | Entirely off topic |
| L. Xerri, Z. Battyani, J. J. Grob, P. Parc, J. Hassoun, J. J. Bonerandi, D. Birnbaum                                                                                                                                                                         | 1996 | Entirely off topic |
| L. G. Dodd, L. J. Layfield                                                                                                                                                                                                                                   | 1996 | Entirely off topic |
| E. Koffi, V. Moutardier, A. Sauvanet, R. Noun, J. F. Flejou, J. Belghiti                                                                                                                                                                                     | 1996 | Entirely off topic |
| J. B. Smith, N. A. Fenske                                                                                                                                                                                                                                    | 1996 | Entirely off topic |
| M. Kanoko, M. Ueda, T. Nagano, M. Ichihashi                                                                                                                                                                                                                  | 1996 | Entirely off topic |
| S. Bertoglio, C. DiSomma, P. Meszaros, M. Gipponi, F. Cafiero, P. Percivale                                                                                                                                                                                  | 1996 | Entirely off topic |
| C. S. Sanchez, A. G. Bascunana, F. A. Pastor Quirante, M. S. Montalban Romero, J. C. Fernandez, J. S. Perez, D. M. Parra, M. Perez-Guillermo                                                                                                                 | 1996 | Entirely off topic |
| P. G. Natali, C. V. Hamby, B. Felding-Habermann, B. Liang, M. R. Nicotra, F. Di Filippo, D. Giannarelli, M. Temponi, S. Ferrone                                                                                                                              | 1997 | Entirely off topic |
| A. Gilhar, Y. Ullmann, R. S. Kalish, T. Berkutski, E. Azizi, I. Bank                                                                                                                                                                                         | 1997 | Entirely off topic |
| D. A. Ross, G. D. Wilson                                                                                                                                                                                                                                     | 1997 | Entirely off topic |
| K. M. Bullard, M. J. Banda, J. M. Arbeit, E. Bergsland, D. M. Young                                                                                                                                                                                          | 1997 | Entirely off topic |
| E. Lartigau, H. Randrianarivelo, M. F. Avril, A. Margulis, A. Spatz, F. Eschwege, M. Guichard                                                                                                                                                                | 1997 | Entirely off topic |
| E. H. Ng, H. B. Pey, H. Y. Law, I. Ng, C. Y. Ji, V. Lin, K. C. Soo                                                                                                                                                                                           | 1997 | Entirely off topic |
| A. A. Tardivon, J. Viala, A. Corvellec Rudelli, J. M. Guinebretiere, D. Vanel                                                                                                                                                                                | 1997 | Entirely off topic |
| D. Kamath, D. Rapaport, R. DeConti, C. W. Cruse, K. Wells, F. Glass, J. Messina, N. Fenske, A. Brobeil, C. Berman, C. Puleo, D. Reintgen                                                                                                                     | 1997 | Entirely off topic |
| T. Cottingham, J. Larson, J. P. Delaney, C. Zachary                                                                                                                                                                                                          | 1997 | Entirely off topic |
| S. Egyhazi, G. P. Margison, J. Hansson, U. Ringborg                                                                                                                                                                                                          | 1997 | Entirely off topic |
| T. T. Kuo, S. Hu, C. L. Huang, H. L. Chan, M. J. W. Chang, P. Dunn,                                                                                                                                                                                          | 1997 | Entirely off topic |

|                                                                                                                                                         |      |                    |
|---------------------------------------------------------------------------------------------------------------------------------------------------------|------|--------------------|
| Y. J. Chen                                                                                                                                              |      |                    |
| R. M. MacKie                                                                                                                                            | 1997 | Entirely off topic |
| A. Kawada, K. Hara, E. Kominami, M. Hiruma, M. Akiyama, A. Ishibashi, H. Abe, E. Ichikawa, Y. Nakamura, S. Watanabe, T. Yamamoto, T. Umeda, K. Nishioka | 1997 | Entirely off topic |
| M. M. Mooney, C. Mettlin, A. M. Michalek, N. J. Petrelli, W. G. Kraybill                                                                                | 1997 | Entirely off topic |
| C. R. Rossi, A. Seno, A. Vecchiato, M. Foletto, A. Tregnaghi, A. Candia, L. Rubaltelli, C. Montesco, M. Lise                                            | 1997 | Entirely off topic |
| T. Hasebe, S. Imoto, S. Sasaki, K. Mukai                                                                                                                | 1998 | Entirely off topic |
| J. F. Marshall, D. C. Rutherford, L. Happerfield, A. Hanby, A. C. McCartney, J. Newton-Bishop, I. R. Hart                                               | 1998 | Entirely off topic |
| F. Navarro, P. Taourel, J. Michel, P. Perney, J. M. Fabre, F. Blanc, J. Domergue                                                                        | 1998 | Entirely off topic |
| F. Montravers, C. Rousseau, J. D. Doublet, B. Gattengo, S. Allard, P. Fouret, J. F. Bernaudin, P. Thibault, J. N. Talbot                                | 1998 | Entirely off topic |
| J. Smolle, R. Hofmann-Wellenhof, E. Pfaffentaler, R. Fink-Puches, H. Kerl                                                                               | 1998 | Entirely off topic |
| S. E. Ames, D. N. Krag, M. S. Brady                                                                                                                     | 1998 | Entirely off topic |
| J. Garcia-Solano, B. Garcia-Rojo, C. Sanchez-Sanchez, S. Montalban-Romero, J. Acosta-Ortega, M. Perez-Guillermo                                         | 1998 | Entirely off topic |
| W. L. White, M. G. Hitchcock                                                                                                                            | 1998 | Entirely off topic |
| C. Schmitt, K. Cire, S. Schattenkirchner, M. Pollok, C. A. Baldamus, B. Krug, T. Kirchner, P. H. Wunsch, T. Krieg, M. Staak                             | 1998 | Entirely off topic |
| R. Grover, J. S. Chana, G. D. Wilson, P. I. Richman, R. Sanders                                                                                         | 1998 | Entirely off topic |
| E. M. Link, P. J. Blower, D. C. Costa, D. M. Lane, D. Lui, R. S. D. Brown, P. J. Ell, M. F. Spittle                                                     | 1998 | Entirely off topic |
| D. M. Touart, P. Sau                                                                                                                                    | 1998 | Entirely off topic |
| T. Wieder, W. Reutter, C. E. Orfanos, C. C. Geilen                                                                                                      | 1998 | Entirely off topic |
| M. Sensi, C. Farina, C. Maccalli, A. Anichini, D. Berd, G. Parmiani                                                                                     | 1998 | Entirely off topic |
| F. Belli, L. Mascheroni, G. Gallino, L. Lenisa, F. Arienti, C. Melani, M. P. Colombo, G. Parmiani, N. Cascinelli                                        | 1998 | Entirely off topic |
| M. Bartolomei, A. Testori, M. Chinol, R. Gennan, C. Cicco, L. Leonardi, S. Zoboli, G. Paganelli                                                         | 1998 | Entirely off topic |
| N. Cascinelli, A. Morabito, M. Santinami, R. M. MacKie, F. Belli                                                                                        | 1998 | Entirely off topic |
| J. S. Goydos, T. S. Ravikumar, F. J. Germino, A. Yudd, E. Bancila                                                                                       | 1998 | Entirely off topic |
| P. J. Borgstein, S. Meijer, P. J. van Diest                                                                                                             | 1999 | Entirely off topic |
| G. Argenziano, G. Fabbrocini, P. Carli, V. De Giorgi, M. Delfino                                                                                        | 1999 | Entirely off topic |
| D. Kamath, A. Brobeil, A. Stall, G. Lyman, C. W. Cruse, F. Glass, N. Fenske, J. Messina, C. Berman, D. Reintgen                                         | 1999 | Entirely off topic |
| C. P. Karakousis                                                                                                                                        | 1999 | Entirely off topic |
| P. R. Dunbar, J. L. Chen, D. Chao, N. Rust, H. Teisserenc, G. S. Ogg, P. Romero, P. Weynants, V. Cerundolo                                              | 1999 | Entirely off topic |
| J. Kurebayashi, T. Otsuki, H. Kunisue, Y. Mikami, K. Tanaka, S. Yamamoto, H. Sonoo                                                                      | 1999 | Entirely off topic |
| P. Paul, F. A. Cabestre, F. A. Le Gal, I. Khalil-Daher, C. Le Danff, M. Schmid, S. Mercier, M. F. Avril, J. Dausset, J. G. Guillet, E. D. Carosella     | 1999 | Entirely off topic |
| D. C. Linehan, A. D. Hill, T. Akhurst, H. Yeung, S. D. Yeh, K. N. Tran, P. I. Borgen, H. S. Cody, 3rd                                                   | 1999 | Entirely off topic |
| J. Kurebayashi, T. Otsuki, C. K. Tang, M. Kurosumi, S. Yamamoto, K. Tanaka, M. Mochizuki, H. Nakamura, H. Sonoo                                         | 1999 | Entirely off topic |
| O. Lavie, P. A. Cross, U. Beller, B. Dawlatly, A. Lopes, J. M. Monaghan                                                                                 | 1999 | Entirely off topic |
| S. F. Zerp, A. van Elsas, L. T. Peltenburg, P. I. Schrier                                                                                               | 1999 | Entirely off topic |
| L. L. Yu, P. J. Heenan                                                                                                                                  | 1999 | Entirely off topic |

|                                                                                                                                                                                                                          |      |                    |
|--------------------------------------------------------------------------------------------------------------------------------------------------------------------------------------------------------------------------|------|--------------------|
| G. Qvigstad, S. Falkmer, B. Westre, H. L. Waldum                                                                                                                                                                         | 1999 | Entirely off topic |
| K. J. Busam                                                                                                                                                                                                              | 1999 | Entirely off topic |
| Z. W. Baloch, M. J. Sack, G. H. Yu, P. K. Gupta                                                                                                                                                                          | 1999 | Entirely off topic |
| F. Adrian Cabestre, P. Moreau, B. Riteau, E. C. Ibrahim, C. Le Danff,<br>J. Dausset, N. Rouas-Freiss, E. D. Carosella, P. Paul                                                                                           | 1999 | Entirely off topic |
| L. Yu Lawrence, P. J. Heenan                                                                                                                                                                                             | 1999 | Entirely off topic |
| R. K. Gupta, S. Naran                                                                                                                                                                                                    | 1999 | Entirely off topic |
| S. G. DuBois, Y. Kalika, J. N. Lukens, G. M. Brodeur, R. C. Seeger, J.<br>B. Atkinson, G. M. Haase, C. T. Black, C. Perez, H. Shimada, R.<br>Gerbing, D. O. Stram, K. K. Matthay                                         | 1999 | Entirely off topic |
| W. Brenner, H. J. Klomp, K. H. Bohuslavizki, B. Szonn, W. U.<br>Kampen, E. Henze                                                                                                                                         | 1999 | Entirely off topic |
| G. Kornek, A. Reiner, P. Sagaster, M. Stierer, A. Mayer, H. Ludwig<br>S. Maeda, H. Hara, T. Morishima                                                                                                                    | 1999 | Entirely off topic |
| D. L. Morton, J. F. Thompson, R. Essner, R. Elashoff, S. L. Stern, O. E.<br>Nieweg, D. F. Roses, C. P. Karakousis, N. Mozzillo, D. Reintgen, H. J.<br>Wang, E. C. Glass, A. J. Cochran                                   | 1999 | Entirely off topic |
| G. Noël, A. M. Chiappa, J. J. Mazon                                                                                                                                                                                      | 1999 | Entirely off topic |
| S. A. Nicholson, M. B. McDermott, P. E. Swanson, M. R. Wick                                                                                                                                                              | 2000 | Entirely off topic |
| J. D. Wagner, H. M. Park, J. J. Coleman, 3rd, C. Love, J. T. Hayes<br>T. Yamamoto, A. Yokoyama                                                                                                                           | 2000 | Entirely off topic |
| R. L. Corsetti, H. M. Allen, H. J. Wanebo                                                                                                                                                                                | 2000 | Entirely off topic |
| A. Stoller, J. Skinner, E. A. Levine                                                                                                                                                                                     | 2000 | Entirely off topic |
| R. P. Gale, R. E. Park, R. Dubois, J. D. Bitran, A. Buzdar, G.<br>Hortobagyi, S. E. Jones, G. S. Lazar, G. Spitzer, S. M. Swain, C. B.<br>Vaughn, C. E. Vogel, S. Martino                                                | 2000 | Entirely off topic |
| M. Ponzoni, G. Arrigoni, V. E. Gould, B. D. Curto, M. Maggioni, A.<br>Scapinello, S. Paolino, A. Cassisa, C. Patriarca                                                                                                   | 2000 | Entirely off topic |
| B. Stark, M. Jeison, R. Gobuzov, S. Finkelshtein, S. Ash, G. Avrahami,<br>I. J. Cohen, J. Stein, I. Yaniv, R. Zaizov, I. Bar-Am                                                                                          | 2000 | Entirely off topic |
| H. M. Prince, G. C. Toner, J. F. Seymour, D. Blakey, P. Gates, S.<br>Eerhard, P. Chapple, D. Wall, M. Quinn, S. Juneja, M. Wolf, E. H.<br>Januszewicz, G. Richardson, J. Scarlett, P. Briggs, M. Brettell, D.<br>Rischin | 2000 | Entirely off topic |
| P. J. Skoll, D. A. Hudson                                                                                                                                                                                                | 2000 | Entirely off topic |
| M. P. Rojas Maria Paulina, Elena Telaro, Ivan Moschetti, Laura Coe,<br>Roldano Fossati, Alessandro Liberati, Turco Rosselli Marco Del                                                                                    | 2000 | Entirely off topic |
| D. Velde-Zimmermann, M. I. Schipper, R. A. Weger, A. Hennipman, I.<br>H. Borel Rinkes                                                                                                                                    | 2000 | Entirely off topic |
| H. Marret, F. Perrotin, P. Bougnoux, B. Giraudeau, B. Hubert, F.<br>Fetissov, O. L. Floch, J. Lansac, G. Body                                                                                                            | 2001 | Entirely off topic |
| S. Shinohara, E. Yamamoto, M. Tanabe, T. Maetani, T. Kim                                                                                                                                                                 | 2001 | Entirely off topic |
| T. Shet, R. Parab, J. Rege                                                                                                                                                                                               | 2001 | Entirely off topic |
| F. Fiore, B. Daniele, E. De Maio, R. Tambaro, V. R. Iaffaioli, A.<br>Barbarisi, S. Pignata                                                                                                                               | 2001 | Entirely off topic |
| C. Braune, A. Widjaja, M. Bartels, J. S. Bleck, P. Flemming, M. P.<br>Manns, J. Klempnauer, M. Gebel                                                                                                                     | 2001 | Entirely off topic |
| M. Moehrle, H. J. Blaheta, P. Ruck                                                                                                                                                                                       | 2001 | Entirely off topic |
| Y. Kitagawa, M. Ohgami, H. Fujii, M. Mukai, T. Kubota, N. Ando, M.<br>Watanabe, Y. Otani, S. Ozawa, H. Hasegawa, T. Furukawa, J. I.<br>Matsuda, K. Kumai, T. Ikeda, A. Kubo, M. Kitajima                                 | 2001 | Entirely off topic |
| J. S. Goydos, M. Patel, W. Shih                                                                                                                                                                                          | 2001 | Entirely off topic |
| R. Grundy, J. Anderson, M. Gaze, M. Gerrard, A. Glaser, A. Gordon,<br>M. Malone, K. Pritchard-Jones, A. Michalski                                                                                                        | 2001 | Entirely off topic |
| P. Guitera-Rovel, J. Lumbroso, M. S. Gautier-Gougis, A. Spatz, S.<br>Mercier, A. Margulis, G. Mamelle, F. Kolb, E. Lartigau, M. F. Avril                                                                                 | 2001 | Entirely off topic |

|                                                                                                                                                                                                     |      |                    |
|-----------------------------------------------------------------------------------------------------------------------------------------------------------------------------------------------------|------|--------------------|
| A. Muller, B. Homey, H. Soto, N. Ge, D. Catron, M. E. Buchanan, T. McClanahan, E. Murphy, W. Yuan, S. N. Wagner, J. L. Barrera, A. Mohar, E. Verastegui, A. Zlotnik                                 | 2001 | Entirely off topic |
| F. L. Meyskens Jr, S. E. McNulty, J. A. Buckmeier, N. B. Tohidian, T. J. Spillane, R. S. Kahlon, R. I. Gonzalez                                                                                     | 2001 | Entirely off topic |
| M. P. Mac Manus, R. J. Hicks, J. P. Matthews, A. Hogg, A. F. McKenzie, A. Wirth, R. E. Ware, D. L. Ball                                                                                             | 2001 | Entirely off topic |
| R. Samant, P. Dunscombe, G. Roberts                                                                                                                                                                 | 2001 | Entirely off topic |
| D. Roseeuw                                                                                                                                                                                          | 2001 | Entirely off topic |
| M. Mohrenschlager, E. Vocks, D. B. Wessner, J. Nahrig, J. Ring                                                                                                                                      | 2001 | Entirely off topic |
| F. Guadagni, P. Ferroni, S. Carlini, S. Mariotti, A. Spila, S. Aloe, R. D'Alessandro, M. D. Carone, A. Cicchetti, A. Ricciotti, I. Venturo, P. Perri, F. Filippo, F. Cognetti, C. Botti, M. Roselli | 2001 | Entirely off topic |
| A. Lafuma, B. Dreno, M. Delaunay, C. Emery, F. Fagnani, K. Hieke, J. J. Bonerandi, J. J. Grob                                                                                                       | 2001 | Entirely off topic |
| K. M. McMasters                                                                                                                                                                                     | 2001 | Entirely off topic |
| K. M. McMasters, S. L. Wong, M. J. Edwards, M. I. Ross, C. Chao, R. D. Noyes, V. Viar, P. B. Cerrito, D. S. Reintgen                                                                                | 2001 | Entirely off topic |
| M. Stas, S. Stroobants, P. Dupont, M. Gysen, L. V. Hoe, M. Garmyn, L. Mortelmans, I. D. Wever                                                                                                       | 2002 | Entirely off topic |
| M. C. Carroll, M. Fleming, C. R. Chitambar, M. Neuburg                                                                                                                                              | 2002 | Entirely off topic |
| S. Hoft, C. Muhle, W. Brenner, E. Sprenger, S. Maune                                                                                                                                                | 2002 | Entirely off topic |
| M. G. Cook, A. Spatz, E. B. Brocker, D. J. Ruitter                                                                                                                                                  | 2002 | Entirely off topic |
| L. Requena, M. Sanguenza, O. P. Sanguenza, H. Kutzner                                                                                                                                               | 2002 | Entirely off topic |
| J. Bonnema, C. J. van de Velde                                                                                                                                                                      | 2002 | Entirely off topic |
| M. N. Mahmood, M. W. Lee, M. D. Linden, S. D. Nathanson, T. J. Hornyak, R. J. Zarbo                                                                                                                 | 2002 | Entirely off topic |
| J. Utikal, U. Leiter, M. Udart, P. Kaskel, R. U. Peter, G. M. Krahn                                                                                                                                 | 2002 | Entirely off topic |
| M. Deichmann, J. Mollenhauer, B. Helmke, M. Thome, W. Hartschuh, A. Poustka, H. Naher                                                                                                               | 2002 | Entirely off topic |
| E. Anaissie, M. Nucci                                                                                                                                                                               | 2002 | Entirely off topic |
| H. El Omari-Alaoui, I. Lahdiri, I. Nejjar, K. Hadadi, F. Ahyoud, H. Hachi, M. Alhilal, H. Errihani, N. Benjaafar, A. Souadka, B. K. El Gueddari                                                     | 2002 | Entirely off topic |
| S. Jang Kim, J. Won Seok, I. Ju Kim, A. Y. Ki Kim                                                                                                                                                   | 2002 | Entirely off topic |
| C. M. Lohmann, K. Iversen, A. A. Jungbluth, M. Berwick, K. J. Busam                                                                                                                                 | 2002 | Entirely off topic |
| S. R. Graziani, F. A. F. Igreja, R. Hegg, C. Meneghetti, L. I. Brandizzi, R. Barboza, R. F. Amancio, J. A. Pinotti, R. C. Maranhao                                                                  | 2002 | Entirely off topic |
| J. Kanitakis, D. Narvaez, A. Claudy                                                                                                                                                                 | 2002 | Entirely off topic |
| C. M. Galmarini, C. Garbovesky, D. Galmarini, F. C. Galmarini                                                                                                                                       | 2002 | Entirely off topic |
| M. Szendroi                                                                                                                                                                                         | 2002 | Entirely off topic |
| J. F. Buell, M. J. Hanaway, J. Trofe, T. G. Gross, T. M. Beebe, R. R. Alloway, M. R. First, E. S. Woodle                                                                                            | 2002 | Entirely off topic |
| A. Karaoglu, M. K. Altundag, M. Erman, H. Engin, I. H. Gullu                                                                                                                                        | 2002 | Entirely off topic |
| A. Sood, V. Midha, N. Sood                                                                                                                                                                          | 2002 | Entirely off topic |
| K. Mourtzikos, J. Villanueva-Meyer                                                                                                                                                                  | 2002 | Entirely off topic |
| H. Nawashiro, N. Otani, H. Katoh, A. Ohnuki, S. Ogata, K. Shima                                                                                                                                     | 2002 | Entirely off topic |
| C. M. Balch                                                                                                                                                                                         | 2002 | Entirely off topic |
| H. Ben-Gary, R. L. McKinney, T. Rosengart, M. L. Lesser, R. G. Crystal                                                                                                                              | 2002 | Entirely off topic |
| C. Chao, S. L. Wong, M. I. Ross, D. S. Reintgen, R. D. Noyes, P. B. Cerrito, M. J. Edwards, K. M. McMasters                                                                                         | 2002 | Entirely off topic |
| M. B. Lens, M. Dawes, T. Goodacre, J. A. Newton-Bishop                                                                                                                                              | 2002 | Entirely off topic |
| K. M. McMasters, C. Chao, S. L. Wong, W. R. Wrightson, M. I. Ross, D. S. Reintgen, R. D. Noyes, P. B. Cerrito, M. J. Edwards                                                                        | 2002 | Entirely off topic |
| K. M. McMasters, S. L. Wong, M. J. Edwards, C. Chao, M. I. Ross, R.                                                                                                                                 | 2002 | Entirely off topic |

|                                                                                                                                                                        |      |                    |
|------------------------------------------------------------------------------------------------------------------------------------------------------------------------|------|--------------------|
| <b>D. Noyes, V. Viar, P. B. Cerrito, D. S. Reintgen</b>                                                                                                                |      |                    |
| <b>N. Neymark, I. Adriaenssen, T. Gorlia, S. Caleo, M. Bolla</b>                                                                                                       | 2002 | Entirely off topic |
| <b>L. S. Wilson, C. M. Reyes, C. Lu, M. Lu, C. Yen</b>                                                                                                                 | 2002 | Entirely off topic |
| <b>K. S. Wong Rebecca, J. Wiffen Philip</b>                                                                                                                            | 2002 | Entirely off topic |
| <b>M. M. Baslaim, S. M. Bakheet, R. Bakheet, A. Ezzat, M. El-Foudeh, A. Tulbah</b>                                                                                     | 2003 | Entirely off topic |
| <b>D. C. Cobben, P. L. Jager, P. H. Elsinga, B. Maas, A. J. Suurmeijer, H. J. Hoekstra</b>                                                                             | 2003 | Entirely off topic |
| <b>D. Castiglia, E. Pagani, E. Alvino, P. Vernole, G. Marra, E. Cannavo, J. Jiricny, G. Zambruno, S. D'Atri</b>                                                        | 2003 | Entirely off topic |
| <b>D. H. Gorski, A. D. Leal, J. S. Goydos</b>                                                                                                                          | 2003 | Entirely off topic |
| <b>E. L. Rosenthal, S. Shreenivas, G. E. Peters, W. E. Grizzle, R. Desmond, C. L. Gladson</b>                                                                          | 2003 | Entirely off topic |
| <b>C. Bozzetti, N. Personeni, R. Nizzoli, A. Guazzi, M. Flora, C. Bassano, F. Negri, E. Martella, N. Naldi, V. Franciosi, S. Cascinu</b>                               | 2003 | Entirely off topic |
| <b>P. N. Bogner, D. R. Fullen, L. Lowe, A. Paulino, J. S. Biermann, V. K. Sondak, L. D. Su</b>                                                                         | 2003 | Entirely off topic |
| <b>K. Shimazu, Y. Tamaki, T. Taguchi, K. Motomura, H. Inaji, H. Koyama, T. Kasugai, A. Wada, S. Noguchi</b>                                                            | 2003 | Entirely off topic |
| <b>A. J. Cochran, C. Bailly, E. Paul</b>                                                                                                                               | 2003 | Entirely off topic |
| <b>C. Chao, M. J. Edwards, T. Abell, S. L. Wong, D. Simpson, K. M. McMasters</b>                                                                                       | 2003 | Entirely off topic |
| <b>J. S. Goydos, K. N. Patel, W. J. Shih, S. E. Lu, A. P. Yudd, J. S. Kempf, E. Bancila, F. J. Germino</b>                                                             | 2003 | Entirely off topic |
| <b>C. C. Compton, R. Barnhill, M. R. Wick, C. Balch</b>                                                                                                                | 2003 | Entirely off topic |
| <b>I. A. Jacobs, C. K. Chang, T. K. DasGupta, G. I. Salti</b>                                                                                                          | 2003 | Entirely off topic |
| <b>R. Delgado, D. Kraus, D. G. Coit, K. J. Busam</b>                                                                                                                   | 2003 | Entirely off topic |
| <b>H. Bonatti, G. Bodner, P. Obrist, O. Bechter, G. Wetscher, D. Oefner</b>                                                                                            | 2003 | Entirely off topic |
| <b>S. D. St Peter, C. C. Nguyen, D. C. Mulligan, A. A. Moss</b>                                                                                                        | 2003 | Entirely off topic |
| <b>J. S. Goydos, D. H. Gorski</b>                                                                                                                                      | 2003 | Entirely off topic |
| <b>K. Wolf, I. Mazo, H. Leung, K. Engelke, U. H. von Andrian, E. I. Deryugina, A. Y. Strongin, E. B. Brocker, P. Friedl</b>                                            | 2003 | Entirely off topic |
| <b>C. L. Lean, R. Bourne, J. F. Thompson, R. A. Scolyer, J. Stretch, L. X. L. Li, P. Russell, C. Mountford</b>                                                         | 2003 | Entirely off topic |
| <b>M. P. M. Stokkel, H. I. E. Reigman, R. B. T. Verkooijen, J. W. Smit</b>                                                                                             | 2003 | Entirely off topic |
| <b>T. Garcia-Caballero, E. Pintos, R. Gallego, C. Parrado, M. Blanco, V. Bjornhagen, J. Forteza, A. Beiras</b>                                                         | 2003 | Entirely off topic |
| <b>E. K. Hale</b>                                                                                                                                                      | 2003 | Entirely off topic |
| <b>M. R. Bernsen, T. F. C. M. Smetzers, E. Van De Westerlo, D. J. Ruiter, L. Hakansson, B. Gustafsson, T. H. Van Kuppevelt, L. Krysender, B. Rettrup, A. Hakansson</b> | 2003 | Entirely off topic |
| <b>K. M. Al Aboud, K. A. Al Hawsawi, M. A. Bhat, V. Ramesh, S. M. Ali</b>                                                                                              | 2003 | Entirely off topic |
| <b>H. Bohner, B. Luther, S. Braunstein, S. Beer, W. Sandmann</b>                                                                                                       | 2003 | Entirely off topic |
| <b>D. J. Dewar, B. W. E. M. Powell</b>                                                                                                                                 | 2003 | Entirely off topic |
| <b>S. Maza, R. Valencia, L. Geworski, D. Sandrock, A. Zander, H. Audring, E. Drager, H. Winter, W. Sterry, D. L. Munz</b>                                              | 2003 | Entirely off topic |
| <b>M. M. Nelson, M. P. Heffernan</b>                                                                                                                                   | 2003 | Entirely off topic |
| <b>R. Dummer</b>                                                                                                                                                       | 2003 | Entirely off topic |
| <b>M. Terenziani, F. Spreafico, A. Serra, M. Podda, S. Cereda, F. Belli</b>                                                                                            | 2003 | Entirely off topic |
| <b>S. Di Cosimo, G. Ferretti, N. Fazio, M. Mandala, G. Curigliano, S. Bosari, M. Intra, A. Latronico, A. Goldhirsch</b>                                                | 2003 | Entirely off topic |
| <b>J. U. Grundmann, E. Weisshaar, I. Franke, B. Bonnekoh, H. Gollnick</b>                                                                                              | 2003 | Entirely off topic |
| <b>G. Ferrara, G. Sarracco, A. Erbazzi, G. Argenziano, F. Cusano</b>                                                                                                   | 2003 | Entirely off topic |
| <b>B. More, H. Bhatt, V. Kukreja, S. S. Ainapure</b>                                                                                                                   | 2003 | Entirely off topic |
| <b>E. A. Grasee, J. D. Wagner</b>                                                                                                                                      | 2003 | Entirely off topic |
| <b>Rachelle Buchbinder, Sally Green, M. Youd Joanne</b>                                                                                                                | 2003 | Entirely off topic |

|                                                                                                                                                                                         |      |                    |
|-----------------------------------------------------------------------------------------------------------------------------------------------------------------------------------------|------|--------------------|
| R. S. Samant, P. B. Dunscombe, G. H. Roberts                                                                                                                                            | 2003 | Entirely off topic |
|                                                                                                                                                                                         | 2004 | Entirely off topic |
| H. Zhang, I. Rosdahl                                                                                                                                                                    | 2004 | Entirely off topic |
| E. Kovalcsik, J. John, M. Turner, L. Birchall, D. Sage, R. Whittle, A. Dagleish, H. Pandha                                                                                              | 2004 | Entirely off topic |
| D. K. Whitaker, W. Sinclair                                                                                                                                                             | 2004 | Entirely off topic |
| J. Kanitakis, B. Chouvet, A. Claudy, J. Y. Scoazec                                                                                                                                      | 2004 | Entirely off topic |
| K. M. McMasters, R. D. Noyes, D. S. Reintgen, J. S. Goydos, P. D. Beitsch, B. S. Davidson, J. J. Sussman, J. E. Gershenwald, M. I. Ross                                                 | 2004 | Entirely off topic |
| K. K. Nelson, J. A. Melendez                                                                                                                                                            | 2004 | Entirely off topic |
| R. A. Scolyer, J. F. Thompson, J. R. Stretch, R. Sharma, S. W. McCarthy                                                                                                                 | 2004 | Entirely off topic |
| O. Tiffet, J. L. Perrot, A. Gentil-Perret, N. Prevot, F. Dubois, E. Alamartine, F. Cambazard                                                                                            | 2004 | Entirely off topic |
| R. A. Schwartz, J. M. Kist, I. Thomas, G. Fernandez, M. A. Cruz, E. I. Koziorynska, W. C. Lambert                                                                                       | 2004 | Entirely off topic |
| V. B. Shidham, R. Komorowski, V. Macias, S. Kaul, G. Dawson, W. W. Dzwierzynski                                                                                                         | 2004 | Entirely off topic |
| K. P. Friedman, R. L. Wahl                                                                                                                                                              | 2004 | Entirely off topic |
| I. M. Mullins, C. L. Slingluff, J. K. Lee, C. F. Garbee, J. Shu, S. G. Anderson, M. E. Mayer, W. A. Knaus, D. W. Mullins                                                                | 2004 | Entirely off topic |
| J. E. Dancy                                                                                                                                                                             | 2004 | Entirely off topic |
| V. C. Denninghoff, A. G. Kahn, J. Falco, H. P. Curutchet, B. Elsner                                                                                                                     | 2004 | Entirely off topic |
| N. A. Gajjar, A. J. Cochran, S. W. Binder                                                                                                                                               | 2004 | Entirely off topic |
| V. Koljonen, E. Tukiainen, C. Haglund, T. Bohling                                                                                                                                       | 2004 | Entirely off topic |
| J. Hofmann                                                                                                                                                                              | 2004 | Entirely off topic |
| E. Fiedler, R. C. Nayak, W. Ch Marsch, P. Helmbold                                                                                                                                      | 2004 | Entirely off topic |
| C. D'Arrigo, I. S. Fentiman                                                                                                                                                             | 2004 | Entirely off topic |
| P. M. Guerriere-Kovach, E. L. Hunt, J. W. Patterson, D. J. Glembocki, J. C. English Iii, M. R. Wick                                                                                     | 2004 | Entirely off topic |
| M. Bornhauser, U. Klenk, C. Rollig, M. Haack, J. Babatz, O. Koch, G. Baretton, G. Ehninger                                                                                              | 2004 | Entirely off topic |
| D. L. Ginsberg                                                                                                                                                                          | 2004 | Entirely off topic |
| D. Oudit, M. Ellabban, G. Vuppapapati, H. Stringfellow, A. Korashi                                                                                                                      | 2004 | Entirely off topic |
| I. A. Olivotto, P. T. Truong, C. H. Speers, V. Bernstein, S. J. Allan, S. J. Kelly, M. L. Lesperance                                                                                    | 2004 | Entirely off topic |
| R. De Pasquale, L. Torrisi, N. Pulvirenti, G. Micali                                                                                                                                    | 2004 | Entirely off topic |
| M. L. Bafounta, A. Beauchet, S. Chagnon, P. Saiag                                                                                                                                       | 2004 | Entirely off topic |
| C. Chao, R. C. Martin, M. I. Ross, D. S. Reintgen, M. J. Edwards, R. D. Noyes, L. J. Hagendoorn, A. J. Stromberg, K. M. McMasters                                                       | 2004 | Entirely off topic |
| J. Shen, K. K. Hunt, N. Q. Mirza, T. A. Buchholz, G. V. Babiera, H. M. Kuerer, I. Bedrosian, M. I. Ross, F. C. Ames, B. W. Feig, S. Eva Singletary, M. Cristofanilli, F. Meric-Bernstam | 2005 | Entirely off topic |
| A. Balzani, R. Clerico, R. A. Schwartz, S. Panetta, C. Panetta, N. Skroza, D. Innocenzi, S. Calvieri                                                                                    | 2005 | Entirely off topic |
| L. Benoit, C. Boichot, N. Cheynel, L. Arnould, B. Chauffert, J. Cuisenier, J. Fraisse                                                                                                   | 2005 | Entirely off topic |
| R. Camp, R. Feezor, A. Kasraeian, J. Cendan, S. Schell, E. Wilkinson, E. Copeland, S. Lind                                                                                              | 2005 | Entirely off topic |
| L. Kretschmer, I. Beckmann, K. M. Thoms, H. Haenssle, H. P. Bertsch, Ch Neumann                                                                                                         | 2005 | Entirely off topic |
| E. Ohtake, T. Asaga, M. Inaba                                                                                                                                                           | 2005 | Entirely off topic |
| L. M. Gamble, T. J. Farrell, G. W. Jones, J. E. Hayward                                                                                                                                 | 2005 | Entirely off topic |
| M. G. Bernengo, P. Quaglino, N. Cappello, M. T. Fierro, G. C. Doveil, G. Macripo, S. Osella-Abate, A. Peroni, F. Lisa, P. Savoia                                                        | 2005 | Entirely off topic |
| M. A. Gerlach                                                                                                                                                                           | 2005 | Entirely off topic |

|                                                                                                                                                                                                                     |      |                    |
|---------------------------------------------------------------------------------------------------------------------------------------------------------------------------------------------------------------------|------|--------------------|
| R. C. G. Martin II, C. R. Scoggins, M. I. Ross, D. S. Reintgen, R. D. Noyes, M. J. Edwards, K. M. McMasters                                                                                                         | 2005 | Entirely off topic |
| M. R. Ghavam-Nasiri, K. Anvari, G. H. Nowferesti, M. Silanian-Toosi                                                                                                                                                 | 2005 | Entirely off topic |
| P. H. Tan, C. L. H. Chan, C. Chan, A. J. T. George                                                                                                                                                                  | 2005 | Entirely off topic |
| M. Natsuizaka, T. Omura, T. Akaike, Y. Kuwata, K. Yamazaki, T. Sato, Y. Karino, J. Toyota, T. Suga, M. Asaka                                                                                                        | 2005 | Entirely off topic |
| T. L. Huston, R. M. Simmons                                                                                                                                                                                         | 2005 | Entirely off topic |
| E. Poblet, F. Jimenez, C. De Cabo, A. Prieto-Martin, R. Sanchez-Prieto                                                                                                                                              | 2005 | Entirely off topic |
| F. Picciotto, A. Zaccagna, G. Derosa, A. Pisacane, P. Puiatti, E. Colombo, F. Dardano, A. Ottinetti                                                                                                                 | 2005 | Entirely off topic |
| T. Nakajima, S. Sekoguchi, T. Nishikawa, H. Takashima, T. Watanabe, M. Minami, Y. Itoh, N. Mizuta, H. Nakajima, T. Mazaki, A. Yanagisawa, T. Okanoue                                                                | 2005 | Entirely off topic |
| S. J. White, W. H. I. McLean                                                                                                                                                                                        | 2005 | Entirely off topic |
| L. Divona, S. Giustini, R. Porciello, G. Oteri, C. Di Perna, D. Innocenzi, S. Calvieri                                                                                                                              | 2005 | Entirely off topic |
| S. J. Lee, K. S. Lee, Y. J. Yim, T. S. Kim, Y. M. Shim, K. Kim                                                                                                                                                      | 2005 | Entirely off topic |
| D. L. Aisner, A. Maker, S. A. Rosenberg, D. M. Berman                                                                                                                                                               | 2005 | Entirely off topic |
| L. Barzon, G. Masi, K. Fincati, M. Pacenti, V. Pezzi, G. Altavilla, F. Fallo, G. Palu                                                                                                                               | 2005 | Entirely off topic |
| D. Ivan, A. H. Diwan, V. G. Prieto                                                                                                                                                                                  | 2005 | Entirely off topic |
| R. Kumar, A. Alavi                                                                                                                                                                                                  | 2005 | Entirely off topic |
| G. S. Missotten, S. Keijser, R. J. W. De Ketzer, D. De Wolff-Rouendaal                                                                                                                                              | 2005 | Entirely off topic |
| D. Di Stasi, V. Vallacchi, V. Campi, T. Ranzani, M. Daniotti, E. Chiodini, S. Fiorentini, I. Greeve, A. Prinetti, L. Rivoltini, M. A. Pierotti, M. Rodolfo                                                          | 2005 | Entirely off topic |
| J. A. Aviles-Izquierdo, R. Suarez-Fernandez, P. Lazaro-Ochaita, M. I. Longo-Imedio                                                                                                                                  | 2005 | Entirely off topic |
| R. Cardoso, R. Vieira, R. Mascarenhas, C. Monteiro, H. Oliveira, J. D. Freitas, O. Tellechea, M. Marques, C. Lourenco, H. Duarte, J. P. Lima, M. J. Juliao, A. Figueiredo                                           | 2005 | Entirely off topic |
| R. Nenkov, R. Radev, K. Christosov, T. Sechanov                                                                                                                                                                     | 2005 | Entirely off topic |
| S. B. Cho, M. R. Roh, M. Yun, S. K. Yun, M. G. Lee, K. Y. Chung                                                                                                                                                     | 2005 | Entirely off topic |
| Robert Dellavalle, Amanda Drake, Marla Graber, Lauren Heilig, Eric Hester, Kathryn Johnson, Kristie McNealy, Lisa Schilling                                                                                         | 2005 | Entirely off topic |
| M. Diener-West, S. M. Reynolds, D. J. Agugliaro, R. Caldwell, K. Cumming, J. D. Earle, B. S. Hawkins, J. A. Hayman, I. Jaiyesimi, J. M. Kirkwood, W. J. Koh, D. M. Robertson, J. M. Shaw, B. R. Straatsma, J. Thoma | 2005 | Entirely off topic |
| D. L. Morton, A. J. Cochran, J. F. Thompson, R. Elashoff, R. Essner, E. C. Glass, N. Mozzillo, O. E. Nieweg, D. F. Roses, H. J. Hoekstra, C. P. Karakousis, D. S. Reintgen, B. J. Coventry, H. J. Wang              | 2005 | Entirely off topic |
| Wolfgang Schwenk, Oliver Haase, J. Neudecker Jens, M. Müller Joachim                                                                                                                                                | 2005 | Entirely off topic |
| S. S. Mitra, R. Simcock                                                                                                                                                                                             | 2006 | Entirely off topic |
| F. Andre, N. Cabioglu, H. Assi, J. C. Sabourin, S. Delalogue, A. Sahin, K. Broglio, J. P. Spano, C. Combadiere, C. Bucana, J. C. Soria, M. Cristofanilli                                                            | 2006 | Entirely off topic |
| G. M. Beer, S. Baumuller, N. Zech, P. Wyss, D. Strasser, Z. Varga, B. Seifert, J. Hafner, D. Mihic-Probst                                                                                                           | 2006 | Entirely off topic |
| A. Scope, C. Benvenuto-Andrade, A. L. Agero, A. A. Marghoob                                                                                                                                                         | 2006 | Entirely off topic |
| A. C. Civelek, B. Piotrowski, M. M. Osman, E. Memisoglu, N. Khayyat, H. J. Reimers, K. S. Naunheim                                                                                                                  | 2006 | Entirely off topic |
| U. Guth, G. Singer, I. Langer, A. Schotzau, L. Herberich, W. Holzgreve, E. Wight                                                                                                                                    | 2006 | Entirely off topic |
| S. Y. Kong, B. H. Nam, K. S. Lee, Y. Kwon, E. S. Lee, M. W. Seong, D.                                                                                                                                               | 2006 | Entirely off topic |

|                                                                                                                                                                                                               |      |                    |
|---------------------------------------------------------------------------------------------------------------------------------------------------------------------------------------------------------------|------|--------------------|
| <b>H. Lee, J. Ro</b>                                                                                                                                                                                          |      |                    |
| <b>L. Kretschmer, I. Beckmann, K. M. Thoms, C. Mitteldorf, H. P. Bertsch, C. Neumann</b>                                                                                                                      | 2006 | Entirely off topic |
| <b>A. J. Wyatt, A. L. C. Agero, R. Delgado, K. J. Busam, A. A. Marghoob</b>                                                                                                                                   | 2006 | Entirely off topic |
| <b>M. A. Huber, N. Kraut, N. Schweifer, H. Dolznig, R. U. Peter, R. D. Schubert, K. Scharffetter-Kochanek, H. Pehamberger, P. Garin-Chesa</b>                                                                 | 2006 | Entirely off topic |
| <b>A. Blum, M. H. Schmid-Wendtner, V. Mauss-Kiefer, J. Y. Eberle, C. Kuchelmeister, D. Dill-Muller</b>                                                                                                        | 2006 | Entirely off topic |
| <b>U. Trefzer, M. Hofmann, S. Reinke, Y. J. Guo, H. Audring, G. Spagnoli, W. Sterry</b>                                                                                                                       | 2006 | Entirely off topic |
| <b>S. Bahrami, J. C. Malone, S. Lear, A. W. Martin</b>                                                                                                                                                        | 2006 | Entirely off topic |
| <b>J. A. Woolgar</b>                                                                                                                                                                                          | 2006 | Entirely off topic |
| <b>W. Y. Teo, M. Y. Chan, C. M. Lam, C. Y. Chong</b>                                                                                                                                                          | 2006 | Entirely off topic |
| <b>S. Sundar, T. K. Jha, C. P. Thakur, S. K. Bhattacharya, M. Rai</b>                                                                                                                                         | 2006 | Entirely off topic |
| <b>J. A. Urbina</b>                                                                                                                                                                                           | 2006 | Entirely off topic |
| <b>S. L. Croft, J. Engel</b>                                                                                                                                                                                  | 2006 | Entirely off topic |
| <b>V. H. C. Bramwell, G. S. Doig, A. B. Tuck, S. M. Wilson, K. S. Tonkin, A. Tomiak, F. Perera, T. A. Vandenberg, A. F. Chambers</b>                                                                          | 2006 | Entirely off topic |
| <b>H. V. Q. Duong, I. W. McLean, D. E. Beahm</b>                                                                                                                                                              | 2006 | Entirely off topic |
| <b>J. E. Rusby, B. L. Smith, F. J. Dominguez, M. Golshan</b>                                                                                                                                                  | 2006 | Entirely off topic |
| <b>D. S. Kaufman</b>                                                                                                                                                                                          | 2006 | Entirely off topic |
| <b>B. K. Somani, D. Prita, S. Grant, G. Nabi, J. N'Dow</b>                                                                                                                                                    | 2006 | Entirely off topic |
| <b>Y. S. Lau, A. Sabokbar, H. Giele, V. Cerundolo, W. Hofstetter, N. A. Athanasou</b>                                                                                                                         | 2006 | Entirely off topic |
| <b>P. K. Long, D. W. Ollila</b>                                                                                                                                                                               | 2006 | Entirely off topic |
| <b>J. D. Berman</b>                                                                                                                                                                                           | 2006 | Entirely off topic |
| <b>Z. Stokes, S. Chan</b>                                                                                                                                                                                     | 2006 | Entirely off topic |
| <b>L. Zhuang, C. S. Lee, R. A. Scolyer, S. W. McCarthy, X. D. Zhang, J. F. Thompson, G. Screaton, P. Hersey</b>                                                                                               | 2006 | Entirely off topic |
| <b>H. Zhang</b>                                                                                                                                                                                               | 2006 | Entirely off topic |
| <b>A. J. Cochran, D. L. Morton</b>                                                                                                                                                                            | 2006 | Entirely off topic |
| <b>E. Von Stebut, W. Brauninger</b>                                                                                                                                                                           | 2006 | Entirely off topic |
| <b>H. Soni, S. Patel, K. Goswami, Y. Gohil</b>                                                                                                                                                                | 2006 | Entirely off topic |
| <b>Gabriele Dennert, Markus Horneber</b>                                                                                                                                                                      | 2006 | Entirely off topic |
| <b>J. Horn, J. Lock-Andersen, H. Sjøstrand, A. Loft</b>                                                                                                                                                       | 2006 | Entirely off topic |
| <b>Giovanni Lodi, Andrea Sardella, Cristina Bez, Federica Demarosi, Antonio Carrassi</b>                                                                                                                      | 2006 | Entirely off topic |
| <b>D. L. Morton, J. F. Thompson, A. J. Cochran, N. Mozzillo, R. Elashoff, R. Essner, O. E. Nieweg, D. F. Roses, H. J. Hoekstra, C. P. Karakousis, D. S. Reintgen, B. J. Coventry, E. C. Glass, H. J. Wang</b> | 2006 | Entirely off topic |
| <b>A. S. Ross, C. D. Schmults</b>                                                                                                                                                                             | 2006 | Entirely off topic |
| <b>M. Stücker, C. Springer, V. Paech, N. Hermes, M. Hoffmann, P. Altmeyer</b>                                                                                                                                 | 2006 | Entirely off topic |
| <b>O. Gentilini, E. Botteri, N. Rotmensz, B. Santillo, N. Peradze, R. C. Saihum, M. Intra, A. Luini, V. Galimberti, A. Goldhirsch, U. Veronesi</b>                                                            | 2007 | Entirely off topic |
| <b>C. Conrad, I. Ischenko, G. Kohl, U. Wiegand, M. Guba, M. Yezhelyev, A. J. Ryan, A. Barge, E. K. Geissler, S. R. Wedge, K. W. Jauch, C. J. Bruns</b>                                                        | 2007 | Entirely off topic |
| <b>K. Volkmer, T. Meyer, M. Sailer, M. Fein</b>                                                                                                                                                               | 2007 | Entirely off topic |
| <b>P. A. Gerber, E. Enderlein, B. Homey, A. Muller, E. Boelke, W. Budach</b>                                                                                                                                  | 2007 | Entirely off topic |
| <b>D. I. Wasserman, J. Sack, A. Gonzalez-Serva, N. Konnikov, G. Bohac, M. F. Demierre</b>                                                                                                                     | 2007 | Entirely off topic |
| <b>A. M. Wallace, C. K. Hoh, D. D. Darrah, G. Schulteis, D. R. Vera</b>                                                                                                                                       | 2007 | Entirely off topic |
| <b>U. Bhure, A. M. Schmitt, B. C. Pestalozzi, T. F. Hany, K. Strobel</b>                                                                                                                                      | 2007 | Entirely off topic |
| <b>C. Visus, R. Andres, J. I. Mayordomo, M. J. Martinez-Lorenzo, L.</b>                                                                                                                                       | 2007 | Entirely off topic |



|                                                                                                                                                                                                                                                                                                             |      |                    |
|-------------------------------------------------------------------------------------------------------------------------------------------------------------------------------------------------------------------------------------------------------------------------------------------------------------|------|--------------------|
| Murillo, B. Saez-Gutierrez, C. Diestre, I. Marcos, P. Astier, J. Godino, F. J. Carapeto-Marquez De Prado, L. Larrad, A. Tres S. Rottey, D. Loose, L. Vakaet, C. Lahorte, H. Vermeersch, S. Van Belle, C. Van de Wiele                                                                                       | 2007 | Entirely off topic |
| Y. Yang, H. Nagano, H. Ota, O. Morimoto, M. Nakamura, H. Wada, T. Noda, B. Damdinsuren, S. Marubashi, A. Miyamoto, Y. Takeda, K. Dono, K. Umeshita, S. Nakamori, K. Wakasa, M. Sakon, M. Monden S. Brychtova, M. Fiuraskova, A. Hlobilkova, T. Brychta, J. Hirnak U. K. Bhanot, S. K. Rauniyar, V. P. Mital | 2007 | Entirely off topic |
| L. A. Fearfield, J. M. G. Larkin, A. Rowe, R. A'Hern, C. Fisher, N. Francis, R. MacKie, B. McCann, M. E. Gore, C. B. Bunker                                                                                                                                                                                 | 2007 | Entirely off topic |
| L. A. Cone, A. A. Morrow, M. Benson, B. Younes, R. Gade-Andavolu R. D. Niederkoher, S. S. Dadras, M. Leavitt, I. R. McDougall                                                                                                                                                                               | 2007 | Entirely off topic |
| H. Liang, H. Wu, T. A. Giorgadze, D. Sariya, K. S. W. Bellucci, R. Veerappan, B. Liegl, G. Acs, R. Elenitsas, S. Shukla, G. A. Youngberg, P. S. Coogan, T. Pasha, P. J. Zhang, X. Xu                                                                                                                        | 2007 | Entirely off topic |
| D. Ciolczyk-Wierzbicka, M. Bodzioch, D. Gil, D. Zmudzinska, A. Dembinska-Kiec, P. Laidler                                                                                                                                                                                                                   | 2007 | Entirely off topic |
| M. Vuoristo, P. Vihinen, T. Vlaykova, C. Nylund, J. Heino, S. Pyrhonen                                                                                                                                                                                                                                      | 2007 | Entirely off topic |
| R. Murali, A. Doubrovsky, G. F. Watson, P. R. McKenzie, C. S. Lee, D. J. McLeod, R. F. Uren, J. R. Stretch, R. P. M. Saw, J. F. Thompson, R. A. Scolyer                                                                                                                                                     | 2007 | Entirely off topic |
| F. Lin, P. L. Zhang, X. J. Yang, J. Shi, T. Blasick, W. K. Han, H. L. Wang, S. S. Shen, B. T. Teh, J. V. Bonventre                                                                                                                                                                                          | 2007 | Entirely off topic |
| A. M. Pisacane, F. Picciotto, M. Risio                                                                                                                                                                                                                                                                      | 2007 | Entirely off topic |
| E. Maubec, J. Lumbroso, F. Masson, V. Suci, F. Kolb, G. Mabelle, A. Cavalcanti, F. Boitier, A. Spatz, A. Auperin, S. Leboulleux, M. F. Avril                                                                                                                                                                | 2007 | Entirely off topic |
| F. Cetani, E. Ambrogini, P. Viacava, E. Pardi, G. Fanelli, A. G. Naccarato, S. Borsari, M. Lemmi, P. Berti, P. Miccoli, A. Pinchera, C. Marcocci                                                                                                                                                            | 2007 | Entirely off topic |
| G. Auricchio, F. D'Aquilio, V. Chiurchiu, G. Mancino, P. M. Baldini M. J. Veness, D. Harris                                                                                                                                                                                                                 | 2007 | Entirely off topic |
| T. Cabrera, E. Lara, J. M. Romero, I. Maleno, L. M. Real, F. Ruiz-Cabello, P. Valero, F. M. Camacho, F. Garrido                                                                                                                                                                                             | 2007 | Entirely off topic |
| C. D. Collins                                                                                                                                                                                                                                                                                               | 2007 | Entirely off topic |
| W. A. M. Blox, J. J. Lesterhuis, M. P. M. Andriessen, M. A. J. Verdijk, K. J. A. Punt, M. J. L. Ligtenberg                                                                                                                                                                                                  | 2007 | Entirely off topic |
| E. A. Choi, J. E. Gershenwald                                                                                                                                                                                                                                                                               | 2007 | Entirely off topic |
| P. Quaglino, S. Osella-Abate, N. Cappello, M. Ortoncelli, T. Nardo, M. T. Fierro, F. Cavallo, P. Savoia, M. G. Bernengo                                                                                                                                                                                     | 2007 | Entirely off topic |
| Y. Nobeyama, E. Okochi-Takada, J. Furuta, Y. Miyagi, K. Kikuchi, A. Yamamoto, Y. Nakanishi, H. Nakagawa, T. Ushijima                                                                                                                                                                                        | 2007 | Entirely off topic |
| N. S. Salemis                                                                                                                                                                                                                                                                                               | 2007 | Entirely off topic |
| P. P. Vihinen, J. Hilli, M. S. Vuoristo, K. J. Syrjanen, V. M. Kahari, S. O. Pyrhonen                                                                                                                                                                                                                       | 2007 | Entirely off topic |
| S. Sundar, P. L. Olliaro                                                                                                                                                                                                                                                                                    | 2007 | Entirely off topic |
| D. C. Dapprich, R. K. Roenigk                                                                                                                                                                                                                                                                               | 2007 | Entirely off topic |
| M. Pezzatini, G. Marino, S. Conte, V. Catracchia                                                                                                                                                                                                                                                            | 2007 | Entirely off topic |
| Atkins, Linehan, Flaherty, Sosman, George, McDermott, Libermann                                                                                                                                                                                                                                             | 2007 | Entirely off topic |
| P. Sardari Nia, E. Van Marck, P. Van Schil                                                                                                                                                                                                                                                                  | 2007 | Entirely off topic |
| V. De Giorgi, C. Salvini, S. Sestini, M. Vignoli, R. Sestini, F. Papi, T. Lotti                                                                                                                                                                                                                             | 2007 | Entirely off topic |
| J. Adderley Una, Ruth Smith                                                                                                                                                                                                                                                                                 | 2007 | Entirely off topic |
| J. Bath-Hextall Fiona, Jo Leonardi-Bee, Neal Somchand, C. Webster Angela, Jim Delitt, William Perkins                                                                                                                                                                                                       | 2007 | Entirely off topic |

|                                                                                                                                                                                                          |      |                    |
|----------------------------------------------------------------------------------------------------------------------------------------------------------------------------------------------------------|------|--------------------|
| R. B. Chagpar, M. I. Ross, D. S. Reintgen, M. J. Edwards, C. R. Scoggins, R. C. Martin, R. D. Noyes, J. S. Goydos, P. D. Beitsch, M. M. Urist, S. Ariyan, B. S. Davidson, J. J. Sussman, K. M. McMasters | 2007 | Entirely off topic |
| Simon Dagenais, J. Yelland Michael, Chris Del Mar, L. Schoene Mark                                                                                                                                       | 2007 | Entirely off topic |
| Ann Dewey, Chris Baughan, P. Dean Taraneh, Bernie Higgins, Ian Johnson                                                                                                                                   | 2007 | Entirely off topic |
| S. Mocellin, D. S. Hoon, P. Pilati, C. R. Rossi, D. Nitti                                                                                                                                                | 2007 | Entirely off topic |
| B. G. Molenkamp, P. A. Leeuwen, S. Meijer, B. J. Sluijter, P. G. Wijnands, A. Baars, A. J. Eertwegh, R. J. Scheper, T. D. Gruijl                                                                         | 2007 | Entirely off topic |
| B. Nicholson Alexander                                                                                                                                                                                   | 2007 | Entirely off topic |
| C. L. Temple, L. J. Snell, S. M. Power, J. R. Parfitt, C. Scilley, C. J. Engel, D. Shum, S. Chakrabarti, M. G. Joseph, R. C. Lohmann, P. Ainsworth                                                       | 2007 | Entirely off topic |
| D. van de Wetering Marianne, B. M. van Woensel Job                                                                                                                                                       | 2007 | Entirely off topic |
| Mingming Zhang, Xuemei Liu, Jing Li, Lin He, Debu Tripathy                                                                                                                                               | 2007 | Entirely off topic |
| C. Boneti, S. Korourian, K. Bland, K. Cox, L. L. Adkins, R. S. Henry-Tillman, V. S. Klimberg                                                                                                             | 2008 | Entirely off topic |
| J. Pattana-arun, B. G. Wolff                                                                                                                                                                             | 2008 | Entirely off topic |
| J. Basile, B. Thiers, J. Maize, Sr., D. M. Lathers                                                                                                                                                       | 2008 | Entirely off topic |
| S. E. Singletary, M. Cristofanilli                                                                                                                                                                       | 2008 | Entirely off topic |
| G. Moarbess, H. El-Hajj, Y. Kfoury, M. E. El-Sabban, Y. Lepelletier, O. Hermine, C. Deleuze-Masquefa, P. A. Bonnet, A. Bazarbachi                                                                        | 2008 | Entirely off topic |
| Y. Yamada, T. Matsumoto, A. Arakawa, S. Ikeda, M. Fujime, Y. Komuro, S. Takeda                                                                                                                           | 2008 | Entirely off topic |
| E. Wimmer, G. Kraehn-Senftleben, W. J. Issing                                                                                                                                                            | 2008 | Entirely off topic |
| R. Green, K. Nelson                                                                                                                                                                                      | 2008 | Entirely off topic |
| F. Niakosari, H. J. Kahn, D. McCready, D. Ghazarian, L. E. Rotstein, A. Marks, A. Kiss, L. From                                                                                                          | 2008 | Entirely off topic |
| D. S. Cassarino, E. S. Cabral, R. V. Kartha, S. M. Swetter                                                                                                                                               | 2008 | Entirely off topic |
| R. Murali, R. N. Sharma, J. F. Thompson, J. R. Stretch, C. S. Lee, S. W. McCarthy, R. A. Scolyer                                                                                                         | 2008 | Entirely off topic |
| A. Rokunohe, H. Nakano, T. Aizu, T. Kaneko, K. Nakajima, S. Ikenaga, Y. Matsuzaki, T. Murai, K. Tamai, D. Sawamura                                                                                       | 2008 | Entirely off topic |
| M. E. Toubert, P. A. Just, G. Baillet, D. Kerob, E. Hindie, O. Verola, M. Revol, J. M. Servant, N. Basset-Seguin, C. Lebbe, E. Banti, D. Rubello, J. L. Moretti                                          | 2008 | Entirely off topic |
| M. P. Schon, M. Schon                                                                                                                                                                                    | 2008 | Entirely off topic |
| S. Kalayoglu-Besisik, F. S. Oguz, F. Aydin, Y. Duvarci, D. Sargin, M. Carin                                                                                                                              | 2008 | Entirely off topic |
| R. Gera, E. N. Saah, A. B. Scott-Emuakpor, R. Kulkarni                                                                                                                                                   | 2008 | Entirely off topic |
| K. Cermak, V. Thill, C. H. Simoens, D. Smets, C. H. Ngongang, P. Mendes Da Costa                                                                                                                         | 2008 | Entirely off topic |
| N. Habbe, J. Waldmann, D. K. Bartsch, V. Fendrich, M. Rothmund, P. Langer                                                                                                                                | 2008 | Entirely off topic |
| M. B. Espindola, O. C. Corleta                                                                                                                                                                           | 2008 | Entirely off topic |
| K. Watanabe, T. Asakage, K. Nakao, Y. Ebihara, Y. Fujishiro, M. Okazaki, H. Asato, M. Sugasawa                                                                                                           | 2008 | Entirely off topic |
| V. Vallacchi, M. Daniotti, F. Ratti, D. Di Stasi, P. Deho, A. De Filippo, G. Tragni, A. Balsari, A. Carbone, L. Rivoltini, G. Parmiani, N. Lazar, B. Perbal, M. Rodolfo                                  | 2008 | Entirely off topic |
| M. E. Kremser, M. Przybylo, D. Hoja-Lukowicz, E. Pohec, A. Amoresano, A. Carpentieri, M. Bubka, A. Litynska                                                                                              | 2008 | Entirely off topic |
| S. F. Nemecek, A. Linecker, C. Czerny, H. Imhof, C. R. Krestan                                                                                                                                           | 2008 | Entirely off topic |
| C. Tibaldi, E. Vasile, I. Bernardini, C. Orlandini, M. Andreuccetti, A. Falcone                                                                                                                          | 2008 | Entirely off topic |
| L. Ricci-Vitiani, A. Pagliuca, E. Palio, A. Zeuner, R. De Maria                                                                                                                                          | 2008 | Entirely off topic |

|                                                                                                                                                                           |      |                    |
|---------------------------------------------------------------------------------------------------------------------------------------------------------------------------|------|--------------------|
| J. Varkonyi, I. Karadi, K. Szocs, I. Sugar, Z. Sapi, M. Marschalko, E. Pallinger, Z. Darvas, A. Falus                                                                     | 2008 | Entirely off topic |
| S. Pastore, F. Mascia                                                                                                                                                     | 2008 | Entirely off topic |
| S. A. Rosenberg                                                                                                                                                           | 2008 | Entirely off topic |
| V. Pallure, C. Michot, B. Guillot, O. Dereure                                                                                                                             | 2008 | Entirely off topic |
| P. Arenberger, M. Arenbergerova, O. Vohradnikova, J. Kremen                                                                                                               | 2008 | Entirely off topic |
| R. P. Cashin, P. Lui, M. Machado, M. E. Hemels, P. K. Corey-Lisle, T. R. Einarson                                                                                         | 2008 | Entirely off topic |
| A. C. Federico, A. B. Chagpar, M. I. Ross, R. C. Martin, R. D. Noyes, J. S. Goydos, P. D. Beitsch, M. M. Urist, S. Ariyan, J. J. Sussman, K. M. McMasters, C. R. Scoggins | 2008 | Entirely off topic |
| D. Furlan Andrea, Marta Imamura, Trish Dryden, Emma Irvin                                                                                                                 | 2008 | Entirely off topic |
| Y. Liu, C. Truini, S. Ariyan                                                                                                                                              | 2008 | Entirely off topic |
| L. Mahieu-Renard, S. Cammilleri, R. Giorgi, C. Gaudy-Marqueste, O. Mundler, M. A. Richard, J. J. Grob                                                                     | 2008 | Entirely off topic |
| D. McNicol Ewan, David Boyce, Roman Schumann, B. Carr Daniel                                                                                                              | 2008 | Entirely off topic |
| H. Neuss, W. Raue, G. Koplin, W. Schwenk, C. Reetz, J. W. Mall                                                                                                            | 2008 | Entirely off topic |
| Marie Pitkethly, Stephen MacGillivray, Rebecca Ryan                                                                                                                       | 2008 | Entirely off topic |
| W. Tremont-Lukats Ivo, O. Ratilal Bernardo, Terri Armstrong, R. Gilbert Mark                                                                                              | 2008 | Entirely off topic |
| Ingrid van Duijvenbode, Petra Jellema, Mireille van Poppel, W. van Tulder Maurits                                                                                         | 2008 | Entirely off topic |
| T. Kimura, H. Kiyota, D. Nakata, T. Masaki, M. Kusaka, S. Egawa                                                                                                           | 2009 | Entirely off topic |
| N. Mamoon, M. A. Sharif, S. Mushtaq, M. T. Khadim, S. Jamal                                                                                                               | 2009 | Entirely off topic |
| R. Sadeghi, M. N. Forghani, B. Memar, A. Abdollahi, S. R. Zakavi, M. T. Mashhadi, H. R. Raziee, A. Tavassoli, V. R. Kakhki                                                | 2009 | Entirely off topic |
| S. L. Blumer, L. R. Scalcione, B. N. Ring, R. Johnson, B. Motroni, D. S. Katz, E. Y. Yung                                                                                 | 2009 | Entirely off topic |
| M. C. Abramowitz, T. Li, M. Morrow, E. R. Sigurdson, P. Anderson, N. Nicolaou, G. Freedman                                                                                | 2009 | Entirely off topic |
| F. Casabona, S. Bogliolo, M. Valenzano Menada, P. Sala, G. Villa, S. Ferrero                                                                                              | 2009 | Entirely off topic |
| R. Berretta, M. Rolla, T. S. Patrelli, D. Gramellini, G. M. Fadda, G. B. Nardelli                                                                                         | 2009 | Entirely off topic |
| N. Mancini, C. Marchetti, F. Esposito, C. De Falco, F. Bellati, M. Giorgini, R. Angioli, P. B. Panici                                                                     | 2009 | Entirely off topic |
| S. Y. Liu, K. F. Lee, P. B. Lai                                                                                                                                           | 2009 | Entirely off topic |
| O. Quaba, T. Shoaib                                                                                                                                                       | 2009 | Entirely off topic |
| E. Richtig, A. Gerger, L. El-Shabrawi-Caelen, J. Szkandera, R. Hofmann-Wellenhof                                                                                          | 2009 | Entirely off topic |
| S. Sharma, M. Kotru, A. Yadav, M. Chugh, A. Chawla, M. Makhija                                                                                                            | 2009 | Entirely off topic |
| V. Mourmouras, G. Cevenini, E. Cosci, M. C. Epistolato, M. Biagioli, L. Barbagli, P. Luzi, S. Mannucci, C. Miracco                                                        | 2009 | Entirely off topic |
| C. H. Gow, Y. L. Chang, Y. C. Hsu, M. F. Tsai, C. T. Wu, C. J. Yu, C. H. Yang, Y. C. Lee, P. C. Yang, J. Y. Shih                                                          | 2009 | Entirely off topic |
| J. Schultz, S. M. Ibrahim, J. Vera, M. Kunz                                                                                                                               | 2009 | Entirely off topic |
| P. D. Sorensen, E. H. Jakobsen, S. T. Langkjer, S. Bokmand, B. Ostergaard, D. A. Olsen, J. S. Madsen, I. Brandslund                                                       | 2009 | Entirely off topic |
| F. Vendittelli, C. Santonocito, A. Paradisi, F. Romitelli, P. Concolino, S. L. Silveri, T. Sisto, R. Capizzi, C. Catricala, A. Mule, A. Di Carlo, C. Zuppi, E. Capoluongo | 2009 | Entirely off topic |
| P. Pouryazdanparast, M. Newman, M. Mafee, Z. Haghighat, J. Guitart, P. Gerami                                                                                             | 2009 | Entirely off topic |
| B. T. Varghese, P. Sebastian, A. Mathew                                                                                                                                   | 2009 | Entirely off topic |
| N. Ibrahim, F. G. Haluska                                                                                                                                                 | 2009 | Entirely off topic |
| R. Omranipour, H. R. H. Mofrad, F. Fereidouni, B. Kalaghchi                                                                                                               | 2009 | Entirely off topic |

|                                                                                                                                                                                                                          |      |                    |
|--------------------------------------------------------------------------------------------------------------------------------------------------------------------------------------------------------------------------|------|--------------------|
| A. Shaaban, M. Rezvani                                                                                                                                                                                                   | 2009 | Entirely off topic |
| G. Ohara, H. Satoh, K. Kurishima, M. Ohtsuka, N. Hizawa                                                                                                                                                                  | 2009 | Entirely off topic |
| K. J. Reeves, M. W. R. Reed, N. J. Brown                                                                                                                                                                                 | 2009 | Entirely off topic |
| K. H. In, Y. S. Kwon, I. J. Oh, K. S. Kim, M. H. Jung, K. H. Lee, S. Y. Kim, J. S. Ryu, S. Y. Lee, E. T. Jeong, S. Y. Lee, H. K. Yum, C. G. Lee, W. S. Kim, J. I. Zo, H. Kim, Y. W. Kim, S. K. Kim, J. C. Lee, Y. C. Kim | 2009 | Entirely off topic |
| T. Monclair, G. M. Brodeur, P. F. Ambros, H. J. Brisse, G. Cecchetto, K. Holmes, M. Kaneko, W. B. London, K. K. Matthay, J. G. Nuchtern, D. Von Schweinitz, T. Simon, S. L. Cohn, A. D. J. Pearson                       | 2009 | Entirely off topic |
| P. Savoia, P. Fava, T. Nardo, S. Osella-Abate, P. Quaglini, M. G. Bernengo                                                                                                                                               | 2009 | Entirely off topic |
| J. J. Cangelosi, J. W. Nash, V. G. Prieto, D. Ivan                                                                                                                                                                       | 2009 | Entirely off topic |
| O. B. Ozgursoy, S. Karatayli Ozgursoy, A. Okcu Heper, I. Yorulmaz                                                                                                                                                        | 2009 | Entirely off topic |
| T. D. Prickett, N. S. Agrawal, X. Wei, K. E. Yates, J. C. Lin, J. R. Wunderlich, J. C. Cronin, P. Cruz, S. A. Rosenberg, Y. Samuels                                                                                      | 2009 | Entirely off topic |
| T. Kabumoto, H. Fujiwara, N. Kariya, T. Tsujimoto, K. Ito, M. Ito, H. Kobayashi                                                                                                                                          | 2009 | Entirely off topic |
| D. Andreou, P. U. Tunn                                                                                                                                                                                                   | 2009 | Entirely off topic |
| A. Minagawa, H. Koga, K. Sakaizawa, K. Sano, T. Saida                                                                                                                                                                    | 2009 | Entirely off topic |
| K. Hayashi, T. Yamamoto, K. Oyama, T. Nagai, R. Tsuboi                                                                                                                                                                   | 2009 | Entirely off topic |
| P. Rubegni, F. Mandato, V. Mourmouras, R. Danielli, M. Fimiani                                                                                                                                                           | 2009 | Entirely off topic |
| S. C. Lester, S. Bose, Y. Y. Chen, J. L. Connolly, M. E. De Baca, P. L. Fitzgibbons, D. F. Hayes, C. Kleer, F. P. O'Malley, D. L. Page, B. L. Smith, L. K. Tan, D. L. Weaver, E. Winer                                   | 2009 | Entirely off topic |
| R. Cecchi, V. Rapicano                                                                                                                                                                                                   | 2009 | Entirely off topic |
| K. S. Hoek, O. M. Eichhoff, D. Widmer, R. Dummer                                                                                                                                                                         | 2009 | Entirely off topic |
| Alison Avenell, J. Gillespie William, D. Gillespie Lesley, Dianne O'Connell                                                                                                                                              | 2009 | Entirely off topic |
| C. Bennett                                                                                                                                                                                                               | 2009 | Entirely off topic |
| Katja Boehm, Francesca Borrelli, Edzard Ernst, Gabi Habacher, Kang Hung Shao, Stefania Milazzo, Markus Horneber                                                                                                          | 2009 | Entirely off topic |
| Margaretha Goedendorp Martine, F. M. Gielissen Marieke, Ahhvm Verhagen Constantijn, Gijs Bleijenberg                                                                                                                     | 2009 | Entirely off topic |
| Selvan Gurusamy Kurinchi, Jun Li, Dinesh Sharma, R. Davidson Brian                                                                                                                                                       | 2009 | Entirely off topic |
| R. F. Medeiros Lídia, D. Rosa Daniela, C. Bozzetti Mary, M. G. Fachel Jandyra, Susan Furness, Ray Garry, Ines Rosa Maria, T. Stein Airton                                                                                | 2009 | Entirely off topic |
| M. Moehrle, H. Dietrich, C. D. Patz, H. M. Häfner                                                                                                                                                                        | 2009 | Entirely off topic |
| R. L. Morton, K. Howard, J. F. Thompson                                                                                                                                                                                  | 2009 | Entirely off topic |
| H. Neuss, W. Raue, G. Koplin, W. Schwenk, C. Reetz, J. W. Mall                                                                                                                                                           | 2009 | Entirely off topic |
| R. E. Unlü, S. Altun, M. Kerem, M. N. Koç                                                                                                                                                                                | 2009 | Entirely off topic |
| C. E. Woodall, R. C. Martin, A. J. Stromberg, B. Ginter, A. Burton, M. I. Ross, M. J. Edwards, K. M. McMasters, C. R. Scoggins                                                                                           | 2009 | Entirely off topic |
| T. Kataoka, M. Umeda, T. Shigeta, H. Takahashi, T. Komori                                                                                                                                                                | 2010 | Entirely off topic |
| T. Krejsgaard, K. Kopp, E. Ralfkiaer, A. E. Willumsgaard, K. W. Eriksen, T. Labuda, S. Rasmussen, A. M. Mathiesen, C. Geisler, B. Lauenborg, J. C. Becker, Q. Zhang, M. A. Wasik, N. Odum, A. Woetmann                   | 2010 | Entirely off topic |
| G. Jilani, D. Mohamed, H. Wadia, K. Ramzi, J. Meriem, L. Houssem, G. Samir, B. R. Nawfel                                                                                                                                 | 2010 | Entirely off topic |
| N. Bozdogan, O. Bozdogan, I. Pak, P. Atasoy                                                                                                                                                                              | 2010 | Entirely off topic |
| A. D. Boiko, O. V. Razorenova, M. van de Rijn, S. M. Swetter, D. L. Johnson, D. P. Ly, P. D. Butler, G. P. Yang, B. Joshua, M. J. Kaplan, M. T. Longaker, I. L. Weissman                                                 | 2010 | Entirely off topic |
| O. Catalano, C. Caraco, N. Mozzillo, A. Siani                                                                                                                                                                            | 2010 | Entirely off topic |

|                                                                                                                                                                                                               |      |                    |
|---------------------------------------------------------------------------------------------------------------------------------------------------------------------------------------------------------------|------|--------------------|
| <b>R. Murali, C. Desilva, J. F. Thompson, R. A. Scolyer</b>                                                                                                                                                   | 2010 | Entirely off topic |
| <b>D. E. Bassi, J. Zhang, J. Cenna, S. Litwin, E. Cukierman, A. J. Klein-Szanto</b>                                                                                                                           | 2010 | Entirely off topic |
| <b>L. Gressier, P. Guilpain, I. Gorin, A. Carlotti, C. Goulvestre, F. Boitier, L. Guillevin, M. F. Avril, L. Mouthon, N. Dupin</b>                                                                            | 2010 | Entirely off topic |
| <b>R. Trepp, B. C. Padberg, Z. Varga, R. Cathomas, R. Inauen, W. H. Reinhart</b>                                                                                                                              | 2010 | Entirely off topic |
| <b>T. Terada, M. Sugiura</b>                                                                                                                                                                                  | 2010 | Entirely off topic |
| <b>D. Massi, M. Landriscina, A. Piscazzi, E. Cosci, A. Kirov, M. Paglierani, C. Di Serio, V. Mourmouras, S. Fumagalli, M. Biagioli, I. Prudovsky, C. Miracco, M. Santucci, N. Marchionni, F. Tarantini</b>    | 2010 | Entirely off topic |
| <b>M. Mascolo, M. L. Vecchione, G. Iardi, M. Scalvenzi, G. Molea, M. Di Benedetto, L. Nugnes, M. Siano, G. De Rosa, S. Staibano</b>                                                                           | 2010 | Entirely off topic |
| <b>F. M. Robertson, W. A. Woodward, R. Pickei, Z. Ye, W. Bornmann, A. Pal, Z. Peng, C. S. Hall, M. Cristofanilli</b>                                                                                          | 2010 | Entirely off topic |
| <b>L. Prasmickaite, B. O. Engesaeter, N. Skrbo, T. Hellenes, A. Kristian, N. K. Oliver, Z. Suo, G. M. Maelandsmo</b>                                                                                          | 2010 | Entirely off topic |
| <b>K. Danker, W. Reutter, G. Semini</b>                                                                                                                                                                       | 2010 | Entirely off topic |
| <b>S. Kada, S. Hirano, I. Tateya, M. Kitamura, S. Ishikawa, T. Kanda, R. Asato, S. Tanaka, J. Ito</b>                                                                                                         | 2010 | Entirely off topic |
| <b>I. Y. Hyun, M. Y. Yun</b>                                                                                                                                                                                  | 2010 | Entirely off topic |
| <b>C. A. Reade, A. K. Ganti, A. Kessinger</b>                                                                                                                                                                 | 2010 | Entirely off topic |
| <b>P. L. Kei, R. Vikram, H. W. D. Yeung, J. R. Stroehlein, H. A. Macapinlac</b>                                                                                                                               | 2010 | Entirely off topic |
| <b>M. A. Stepp, S. Pal-Ghosh, G. Tadvalkar, L. Rajjoub, R. A. Jurjus, M. Gerdes, A. Ryscavage, C. Cataisson, A. Shukla, S. H. Yuspa</b>                                                                       | 2010 | Entirely off topic |
| <b>M. Zacharakis, I. D. Xynos, A. Lazaris, T. Smaro, C. Kosmas, A. Dokou, E. Felekouras, E. Antoniou, A. Polyzos, J. Sarantonis, J. Syrios, G. Zografos, A. Papalambros, N. Tsavaris</b>                      | 2010 | Entirely off topic |
| <b>N. Okada, T. Hasebe, M. Iwasaki, N. Tamura, S. Akashi-Tanaka, T. Hojo, T. Shibata, Y. Sasajima, Y. Kanai, T. Kinoshita</b>                                                                                 | 2010 | Entirely off topic |
| <b>A. Ribas</b>                                                                                                                                                                                               | 2010 | Entirely off topic |
| <b>S. Vano-Galvan, L. Rios-Buceta, D. L. Ma, C. Fernandez-Chacon, J. C. Viera, P. Jaen</b>                                                                                                                    | 2010 | Entirely off topic |
| <b>S. Mehrotra, U. Singh, H. P. Gupta, P. Saxena</b>                                                                                                                                                          | 2010 | Entirely off topic |
| <b>T. Watanabe, Y. Yoshida, O. Yamamoto</b>                                                                                                                                                                   | 2010 | Entirely off topic |
| <b>V. De Giorgi</b>                                                                                                                                                                                           | 2010 | Entirely off topic |
| <b>R. Murali, S. W. McCarthy, J. Bothman, A. Cachia, P. Janarthanan, R. Sharma, R. A. Scolyer</b>                                                                                                             | 2010 | Entirely off topic |
| <b>D. R. McHaffie, K. R. Kozak, T. F. Warner, C. S. Cho, J. P. Heiner, S. Attia</b>                                                                                                                           | 2010 | Entirely off topic |
| <b>D. N. Doshi, A. J. Friedman</b>                                                                                                                                                                            | 2010 | Entirely off topic |
| <b>N. Bayman, C. Faivre-Finn</b>                                                                                                                                                                              | 2010 | Entirely off topic |
| <b>R. E. Brown, M. I. Ross, M. J. Edwards, R. D. Noyes, D. S. Reintgen, L. J. Hagendoorn, A. J. Stromberg, R. C. Martin, K. M. McMasters, C. R. Scoggins</b>                                                  | 2010 | Entirely off topic |
| <b>E. Clarkson Jan, V. Worthington Helen, Susan Furness, Martin McCabe, Tasneem Khalid, Stefan Meyer</b>                                                                                                      | 2010 | Entirely off topic |
| <b>M. B. Faries, J. F. Thompson, A. Cochran, R. Elashoff, E. C. Glass, N. Mozzillo, O. E. Nieweg, D. F. Roses, H. J. Hoekstra, C. P. Karakousis, D. S. Reintgen, B. J. Coventry, H. J. Wang, D. L. Morton</b> | 2010 | Entirely off topic |
| <b>Maria-Eulalia Fernandez-Montoli, Elisabeth Baldrich, Gloria Miralpeix, Luis Gine-Martinez</b>                                                                                                              | 2010 | Entirely off topic |
| <b>T. Francischetto, N. Spector, J. F. Neto Rezende, M. Azevedo Antunes, S. Oliveira Romano, I. A. Small, C. Gil Ferreira</b>                                                                                 | 2010 | Entirely off topic |

|                                                                                                                                                                                                                                          |      |                    |
|------------------------------------------------------------------------------------------------------------------------------------------------------------------------------------------------------------------------------------------|------|--------------------|
| <b>B. Krug, R. Crott, I. Roch, M. Lonneux, C. Beguin, J. F. Baurain, A. S. Pirson, T. Vander Borcht</b>                                                                                                                                  | 2010 | Entirely off topic |
| <b>Liz Lostumbo, E. Carbine Nora, Judi Wallace</b>                                                                                                                                                                                       | 2010 | Entirely off topic |
| <b>S. Pasquali, S. Mocellin, L. G. Campana, E. Bonandini, M. C. Montesco, A. Tregnaghi, P. Fiore, D. Nitti, C. R. Rossi</b>                                                                                                              | 2010 | Entirely off topic |
| <b>C. R. Scoggins, A. L. Bowen, R. C. Martin, M. J. Edwards, D. S. Reintgen, M. I. Ross, M. M. Urist, A. J. Stromberg, L. Hagendoorn, K. M. McMasters</b>                                                                                | 2010 | Entirely off topic |
| <b>C. R. Scoggins, R. C. Martin, M. I. Ross, M. J. Edwards, D. S. Reintgen, M. M. Urist, J. E. Gershenwald, J. J. Sussman, R. Dirk Noyes, J. S. Goydos, P. D. Beitsch, S. Ariyan, A. J. Stromberg, L. J. Hagendoorn, K. M. McMasters</b> | 2010 | Entirely off topic |
| <b>G. K. B. Halkett, M. Jiwa, X. Meng</b>                                                                                                                                                                                                | 2011 | Entirely off topic |
| <b>H. Takahashi, T. Shigeta, M. Umeda, T. Komori</b>                                                                                                                                                                                     | 2011 | Entirely off topic |
| <b>R. L. Barnhill, H. Kutzner, B. Schmidt, L. Ali, M. Bagot, A. Janin, C. Lugassy</b>                                                                                                                                                    | 2011 | Entirely off topic |
| <b>R. Murali, D. Zannino, M. Synnott, S. W. McCarthy, J. F. Thompson, R. A. Scolyer</b>                                                                                                                                                  | 2011 | Entirely off topic |
| <b>O. E. Akilov, R. K. Pillai, L. M. Grandinetti, J. A. Kant, L. Geskin</b>                                                                                                                                                              | 2011 | Entirely off topic |
| <b>R. Bansal, T. Patel, J. Sarin, B. Parikh, A. Ohri, P. Trivedi</b>                                                                                                                                                                     | 2011 | Entirely off topic |
| <b>P. Miliani de Marval, S. Lutfeali, J. Y. Jin, B. Leshin, M. A. Selim, J. Y. Zhang</b>                                                                                                                                                 | 2011 | Entirely off topic |
| <b>A. Nardin, W. C. Wong, C. Tow, T. J. Molina, F. Tissier, A. Audebourg, M. Garcette, A. Caignard, M. F. Avril, J. P. Abastado, A. Prevost-Blondel</b>                                                                                  | 2011 | Entirely off topic |
| <b>S. Tanaka, T. Nohara, S. Nakatani, M. Iwamoto, K. Sumiyoshi, K. Kimura, Y. Takahashi, N. Sato, N. Tanigawa</b>                                                                                                                        | 2011 | Entirely off topic |
| <b>A. Boehringer, U. Leiter, G. Metzler, M. Moehrle, C. Garbe, H. Breuninger</b>                                                                                                                                                         | 2011 | Entirely off topic |
| <b>C. Garbe, T. K. Eigentler, J. Bauer, N. Blodorn-Schlicht, F. Fend, M. Hantschke, P. Kurschat, H. Kutzner, D. Metze, H. Pressler, M. Reusch, M. Rocken, R. Stadler, M. Tronnier, A. Yazdi, G. Metzler</b>                              | 2011 | Entirely off topic |
| <b>S. Ahmad, K. Akhtar, S. Singh, S. Siddiqui</b>                                                                                                                                                                                        | 2011 | Entirely off topic |
| <b>M. Raimbault, V. Lavoue, K. Morcel, I. Hornung, I. Ninet, H. Mesbah, P. Poree, P. Descamps, G. Body, J. Leveque</b>                                                                                                                   | 2011 | Entirely off topic |
| <b>M. Hu, W. Zhao, P. L. Zhang, G. F. Ju, Z. Fu, G. L. Zhang, L. Kong, Y. Q. Yang, Y. Ma, J. Yu</b>                                                                                                                                      | 2011 | Entirely off topic |
| <b>U. Guth, M. E. Myrick, T. Reisch, G. Bosshard, S. M. Schmid</b>                                                                                                                                                                       | 2011 | Entirely off topic |
| <b>F. Yoshimura, K. Inaba, Y. Kawamura, Y. Ishida, K. Taniguchi, J. Isogaki, S. Satoh, S. Kanaya, Y. Sakurai, I. Uyama</b>                                                                                                               | 2011 | Entirely off topic |
| <b>M. G. Gasparinho, D. Proençula, R. Fonseca, S. Andre</b>                                                                                                                                                                              | 2011 | Entirely off topic |
| <b>J. Gadiot, A. I. Hooijkaas, A. D. M. Kaiser, H. Van Tinteren, H. Van Boven, C. Blank</b>                                                                                                                                              | 2011 | Entirely off topic |
| <b>T. Fujita, K. Murayama, T. Hanamura, T. Okada, T. Ito, M. Harada, A. Komatsu, H. Koyama, T. Kanai, K. Maeno, Y. Mochizuki, Y. Hama, K. Ito, J. Amano, M. Fujimori</b>                                                                 | 2011 | Entirely off topic |
| <b>T. Grenader, L. Shavit</b>                                                                                                                                                                                                            | 2011 | Entirely off topic |
| <b>F. O. Ademuyiwa, A. Groman, T. O'Connor, C. Ambrosone, N. Watroba, S. B. Edge</b>                                                                                                                                                     | 2011 | Entirely off topic |
| <b>W. P. M. Breed, C. J. G. Van Den Hurk, M. Peerbooms</b>                                                                                                                                                                               | 2011 | Entirely off topic |
| <b>T. K. Eigentler, A. Figl, D. Krex, P. Mohr, C. Mauch, K. Rass, A. Bostroem, O. Heese, O. Koelbl, C. Garbe, D. Schadendorf</b>                                                                                                         | 2011 | Entirely off topic |
| <b>C. E. Yeager, E. A. Olsen</b>                                                                                                                                                                                                         | 2011 | Entirely off topic |
| <b>C. Kouvidou, M. Lianou, M. Kopaka, A. Kokkori, D. Violidaki, K. Skrepetou</b>                                                                                                                                                         | 2011 | Entirely off topic |
| <b>P. Waster, I. Rosdahl, B. F. Gilmore, O. Seifert</b>                                                                                                                                                                                  | 2011 | Entirely off topic |

|                                                                                                                                                                                                                                      |      |                    |
|--------------------------------------------------------------------------------------------------------------------------------------------------------------------------------------------------------------------------------------|------|--------------------|
| A. G. T. Van Terwisscha Scheltinga, G. M. Van Dam, W. B. Nagengast,<br>V. Ntziachristos, H. Hollema, J. L. Herek, C. P. Schroder, J. G. W.<br>Kosterink, M. N. Lub-de Hoog, E. G. E. De Vries<br>T. Tos, H. Klyver, K. T. Drzewiecki | 2011 | Entirely off topic |
| G. Triquet, B. Bel, A. Ervais, M. H. Aubriot, Y. Cottin, G. Truc, P.<br>Vabres                                                                                                                                                       | 2011 | Entirely off topic |
| H. Sihto, J. Lundin, M. Lundin, T. Lehtimaki, A. Ristimaki, K. Holli,<br>L. Sailas, V. Kataja, T. Turpeenniemi-Hujanen, J. Isola, P. Heikkila, H.<br>Joensuu                                                                         | 2011 | Entirely off topic |
| C. J. Chen, B. Y. Wu, P. I. Tsao, C. Y. Chen, M. H. Wu, Y. L. E. Chan,<br>H. S. Lee, M. D. Johnson, R. L. Eckert, Y. W. Chen, F. Chou, J. K.<br>Wang, C. Y. Lin<br>M. B. McCarville                                                  | 2011 | Entirely off topic |
| A. Yoneta, Y. Tamura, S. Nohara, A. Ito, H. Honda, K. Wakamatsu, S.<br>Ito, T. Yamashita, K. Jimbow                                                                                                                                  | 2011 | Entirely off topic |
| J. H. Kong, Y. H. Park, J. A. Kim, J. H. Kim, J. Yun, J. M. Sun, Y. W.<br>Won, S. Lee, S. T. Kim, E. Y. Cho, J. S. Ahn, Y. H. Im<br>T. Nagasao, T. Horiguchi, J. Miyamoto, K. Kishi<br>H. Uramoto, T. Hanagiri                       | 2011 | Entirely off topic |
| R. Speeckaert, N. van Geel, K. V. Vermaelen, J. Lambert, M. Van<br>Gele, M. M. Speeckaert, L. Brochez                                                                                                                                | 2011 | Entirely off topic |
| C. M. Balch, J. E. Gershenwald, S. J. Soong, J. F. Thompson                                                                                                                                                                          | 2011 | Entirely off topic |
| A. Chaux, V. Reuter, C. Lezcano, E. Velazquez, R. Cudas, A. L. Cubilla<br>G. G. Ang, W. M. Rozen, A. Chauhan, R. Acosta                                                                                                              | 2011 | Entirely off topic |
| M. Patnana, Y. Bronstein, J. Szklaruk, D. G. Bedi, W. J. Hwu, J. E.<br>Gershenwald, V. G. Prieto, C. S. Ng                                                                                                                           | 2011 | Entirely off topic |
| N. Duraker, B. Bati, Z. C. Caynak, D. Demir, I. Kurtulus                                                                                                                                                                             | 2011 | Entirely off topic |
| K. J. Harrington, L. J. Billingham, T. B. Brunner, N. G. Burnet, C. S.<br>Chan, P. Hoskin, R. I. MacKay, T. S. Maughan, J. MacDougall, W. G.<br>McKenna, C. M. Nutting, A. Oliver, R. Plummer, I. J. Stratford, T.<br>Illidge        | 2011 | Entirely off topic |
| M. G. Bourke, S. Salwa, K. J. Harrington, M. J. Kucharczyk, P. F.<br>Forde, M. de Kruijf, D. Soden, M. Tangney, J. K. Collins, G. C.<br>O'Sullivan                                                                                   | 2011 | Entirely off topic |
| P. Quaglini, S. Osella-Abate, F. Marengo, T. Nardo, C. Gado, M.<br>Novelli, P. Savoia, M. G. Bernengo                                                                                                                                | 2011 | Entirely off topic |
| T. Cil, D. Gokalp, S. Onat, A. Isikdogan                                                                                                                                                                                             | 2011 | Entirely off topic |
| D. Brunk                                                                                                                                                                                                                             | 2011 | Entirely off topic |
| F. Tas                                                                                                                                                                                                                               | 2011 | Entirely off topic |
| K. Yoneda, K. Nakai, Y. Hosokawa, T. Moriue, T. Demitsu, Y. Kubota<br>A. Ferlito, J. S. Lewis Jr, A. Rinaldo                                                                                                                         | 2011 | Entirely off topic |
| Gitta Bleeker, A. M. Tytgat Godelieve, A. Adam Judith, N. Caron<br>Huib, Lotty Hooft, C. M. Kremer Leontien, C. van Dalen Elvira                                                                                                     | 2011 | Entirely off topic |
| M. G. Bouwhuis, S. Collette, S. Suci, E. R. Groot, W. H. Kruit, T. L.<br>Hagen, L. A. Aarden, A. M. Eggermont, A. J. Swaak                                                                                                           | 2011 | Entirely off topic |
| M. G. Bouwhuis, S. Suci, W. Kruit, F. Salès, K. Stoitchkov, P. Patel,<br>V. Cocquyt, J. Thomas, D. Liénard, A. M. Eggermont, G. Ghanem                                                                                               | 2011 | Entirely off topic |
| A. L. Burton, J. Gilbert, R. W. Farmer, A. J. Stromberg, L.<br>Hagendoorn, M. I. Ross, R. C. Martin, K. M. McMasters, C. R.<br>Scoggins, G. G. Callender                                                                             | 2011 | Entirely off topic |
| A. L. Burton, B. A. Roach, M. P. Mays, A. F. Chen, B. A. Ginter, A. M.<br>Vierling, C. R. Scoggins, R. C. Martin, A. J. Stromberg, L.<br>Hagendoorn, K. M. McMasters                                                                 | 2011 | Entirely off topic |
| G. G. Callender, M. E. Egger, A. L. Burton, C. R. Scoggins, M. I. Ross,<br>A. J. Stromberg, L. Hagendoorn, R. C. Martin, K. M. McMasters                                                                                             | 2011 | Entirely off topic |
| G. E. M. de Boer Angela, K. Taskila Taina, J. Tamminga Sietske, H.                                                                                                                                                                   | 2011 | Entirely off topic |

|                                                                                   |      |                    |
|-----------------------------------------------------------------------------------|------|--------------------|
| <b>W. Frings-Dresen Monique, Michael Feuerstein, H. Verbeek Jos</b>               |      |                    |
| <b>Gabriele Dennert, Marcel Zwahlen, Maree Brinkman, Marco Vinceti,</b>           | 2011 | Entirely off topic |
| <b>P. A. Zeegers Maurice, Markus Horneber</b>                                     |      |                    |
| <b>Nigel D'Souza, Geraldine Darmanin, Zbys Fedorowicz</b>                         | 2011 | Entirely off topic |
| <b>M. E. Egger, J. E. Gilbert, A. L. Burton, K. M. McMasters, G. G.</b>           | 2011 | Entirely off topic |
| <b>Callender, A. R. Quillo, R. E. Brown, C. R. Hill, L. Hagendoorn, R. C.</b>     |      |                    |
| <b>Martin, A. J. Stromberg, C. R. Scoggins</b>                                    |      |                    |
| <b>R. Feldmann, M. Schierl, A. M. Fink, P. G. Sator, J. Maiweg, A.</b>            | 2011 | Entirely off topic |
| <b>Steiner</b>                                                                    |      |                    |
| <b>Dian He, Hongyu Zhou, Duan Guo, Zilong Hao, Bo Wu</b>                          | 2011 | Entirely off topic |
| <b>A. Paley Carole, I. Johnson Mark, A. Tashani Osama, Anne-Marie</b>             | 2011 | Entirely off topic |
| <b>Bagnall</b>                                                                    |      |                    |
| <b>N. Rosa, G. H. Lyman, D. Silbermins, M. E. Valsecchi, S. K. Pruitt, D.</b>     | 2011 | Entirely off topic |
| <b>M. Tyler, W. T. Lee</b>                                                        |      |                    |
| <b>M. Rubinstein Sidney, Marienke van Middelkoop, J. J. Assendelft</b>            | 2011 | Entirely off topic |
| <b>Willem, R. de Boer Michiel, W. van Tulder Maurits</b>                          |      |                    |
| <b>José-Ramón Rueda, Ivan Solà, Antonio Pascual, Mireia Subirana</b>              | 2011 | Entirely off topic |
| <b>Casacuberta</b>                                                                |      |                    |
| <b>Bruna Salani, N. Atallah Álvaro, Rachel Riera, Barbosa Bevilacqua</b>          | 2011 | Entirely off topic |
| <b>Jose Luiz</b>                                                                  |      |                    |
| <b>N. K. Koo, Y. C. Kim</b>                                                       | 2012 | Entirely off topic |
| <b>S. J. Yun, H. Y. Park, J. S. Lee, M. H. Park, J. B. Lee, Y. H. Won</b>         | 2012 | Entirely off topic |
| <b>P. Savoia, P. Fava, V. Caliendo, S. Osella-Abate, S. Ribero, P.</b>            | 2012 | Entirely off topic |
| <b>Quaglino, G. Macripo, M. G. Bernengo</b>                                       |      |                    |
| <b>H. Mu, T. L. Calderone, M. A. Davies, V. G. Prieto, H. Wang, G. B.</b>         | 2012 | Entirely off topic |
| <b>Mills, M. Bar-Eli, J. E. Gershenwald</b>                                       |      |                    |
| <b>T. Okitsu, T. Tsuji, T. Fujii, M. Mihara, H. Hara, I. Kisu, D. Aoki, C.</b>    | 2012 | Entirely off topic |
| <b>Miyata, Y. Otaka, M. Liu</b>                                                   |      |                    |
| <b>S. M. Piduru, D. M. Schuster, B. J. Barron, R. Dhanasekaran, D. H.</b>         | 2012 | Entirely off topic |
| <b>Lawson, H. S. Kim</b>                                                          |      |                    |
| <b>Y. Fujisawa, F. Otsuka</b>                                                     | 2012 | Entirely off topic |
| <b>W. S. Wiggett, M. Louw, V. O. Karusseit</b>                                    | 2012 | Entirely off topic |
| <b>A. Di Cesare, F. Sera, A. Gulia, G. Coletti, T. Micantonio, M. C.</b>          | 2012 | Entirely off topic |
| <b>Fargnoli, K. Peris</b>                                                         |      |                    |
| <b>S. Chaturvedi, V. Bansal, R. Kapoor, A. Mandhani</b>                           | 2012 | Entirely off topic |
| <b>J. E. Jung, D. K. Rah, Y. O. Kim</b>                                           | 2012 | Entirely off topic |
| <b>P. Didden, M. C. W. Spaander, B. P. L. Wijnhoven, E. J. Kuipers, M. J.</b>     | 2012 | Entirely off topic |
| <b>Bruno</b>                                                                      |      |                    |
| <b>R. Urgesi, M. E. Riccioni, A. Bizzotto, R. Cianci, C. Spada, G. Pelecca,</b>   | 2012 | Entirely off topic |
| <b>R. M. Ricci, G. Costamagna</b>                                                 |      |                    |
| <b>D. S. Lee, S. H. Kim, S. Kim, Y. J. Suh, H. K. Kim, B. Y. Shim</b>             | 2012 | Entirely off topic |
| <b>R. C. Smallridge, K. B. Ain, S. L. Asa, K. C. Bible, J. D. Brierley, K. D.</b> | 2012 | Entirely off topic |
| <b>Burman, E. Kebebew, N. Y. Lee, Y. E. Nikiforov, M. S. Rosenthal, M.</b>        |      |                    |
| <b>H. Shah, A. R. Shaha, R. M. Tuttle</b>                                         |      |                    |
| <b>I. J. Nixon, M. M. Witcher, F. L. Palmer, R. M. Tuttle, A. R. Shaha, J.</b>    | 2012 | Entirely off topic |
| <b>P. Shah, S. G. Patel, I. Ganly</b>                                             |      |                    |
| <b>J. Borges-Costa, L. Soares De Almeida, M. S. Marques</b>                       | 2012 | Entirely off topic |
| <b>T. A. Balci, Z. P. Koc, H. Komek</b>                                           | 2012 | Entirely off topic |
| <b>H. Uramoto, T. Yamada, S. Yano, N. Kondo, S. Hasegawa, F. Tanaka</b>           | 2012 | Entirely off topic |
| <b>N. Jaimes, J. A. Halpern, S. Puig, J. Malvey, P. L. Myskowski, R. P.</b>       | 2012 | Entirely off topic |
| <b>Braun, A. A. Marghoob</b>                                                      |      |                    |
| <b>A. Y. Cao, L. Huang, J. Wu, J. S. Lu, G. Y. Liu, Z. Z. Shen, Z. M. Shao,</b>   | 2012 | Entirely off topic |
| <b>G. H. Di</b>                                                                   |      |                    |
| <b>C. Nylund, P. Rappu, E. Pakula, A. Heino, L. Laato, L. L. Elo, P.</b>          | 2012 | Entirely off topic |
| <b>Vihinen, S. Pyrhonen, G. R. Owen, H. Larjava, M. Kallajoki, J. Heino</b>       |      |                    |
| <b>A. Machens, H. Dralle</b>                                                      | 2012 | Entirely off topic |



|                                                                                                                                                                                |      |                    |
|--------------------------------------------------------------------------------------------------------------------------------------------------------------------------------|------|--------------------|
| <b>M. Schlaak, P. Schmidt, C. Bangard, P. Kurschat, C. Mauch, H. Abken</b>                                                                                                     | 2012 | Entirely off topic |
| <b>J. A. Gross, C. Perniciaro, D. J. Gross, S. K. Barksdale</b>                                                                                                                | 2012 | Entirely off topic |
| <b>A. Cipponi, M. Mercier, T. Seremet, J. F. Baurain, I. Theate, J. Van Den Oord, M. Stas, T. Boon, P. G. Coulie, N. Van Baren</b>                                             | 2012 | Entirely off topic |
| <b>K. M. McKay, M. T. Deavers, V. G. Prieto</b>                                                                                                                                | 2012 | Entirely off topic |
| <b>M. Wakasugi, M. Tori, H. Akamatsu, K. Yoshidome, S. Ueshima, T. Omori, M. Tei, T. Masuzawa, T. Iwamoto, T. Nishida</b>                                                      | 2012 | Entirely off topic |
| <b>Y. Fang, X. Wang, S. Dusza, S. Jhanwar, D. Abramson, K. J. Busam</b>                                                                                                        | 2012 | Entirely off topic |
| <b>M. Yildirim, M. Yildiz, E. Kurtoglu, H. Karakilinc, S. Goktas, M. Uysal, B. Celik</b>                                                                                       | 2012 | Entirely off topic |
| <b>P. Sharma, R. Kumar, H. Singh, S. Jeph, D. N. Sharma, C. Bal, A. Malhotra</b>                                                                                               | 2012 | Entirely off topic |
| <b>S. Tasneem, F. Naseer, S. Shahid, S. Nasreen, M. M. Khan, N. Javed</b>                                                                                                      | 2012 | Entirely off topic |
| <b>A. K. S. Salama, N. D. Rosa, R. P. Scheri, J. E. Herndon, D. S. Tyler, J. Marcello, S. K. Pruitt, A. P. Abernethy</b>                                                       | 2012 | Entirely off topic |
| <b>S. J. Jung, S. M. Woo, H. K. Park, W. J. Lee, M. A. Han, S. S. Han, S. H. Kim, S. J. Park, T. H. Kim, Y. H. Koh, E. K. Hong</b>                                             | 2012 | Entirely off topic |
| <b>T. Fujita, M. Iwamura, D. Ishii, K. I. Tabata, K. Matsumoto, K. Yoshida, S. Baba</b>                                                                                        | 2012 | Entirely off topic |
| <b>M. Faheem, H. Mahmood, M. Khurram, U. Qasim, J. Irfan</b>                                                                                                                   | 2012 | Entirely off topic |
| <b>Y. Ichiki, T. Hanagiri, M. Takenoyama, T. Baba, Y. Nagata, M. Mizukami, T. So, M. Sugaya, M. Yasuda, H. Uramoro, K. Yasumoto</b>                                            | 2012 | Entirely off topic |
| <b>N. Yucel, H. Sukru Erkal, F. Sinem Akgun, M. Serin</b>                                                                                                                      | 2012 | Entirely off topic |
| <b>V. X. Nguyen, B. D. Nguyen, P. C. Ram</b>                                                                                                                                   | 2012 | Entirely off topic |
| <b>C. J. Tyng, A. G. V. Bitencourt, E. B. L. Martins, P. N. V. Pinto, R. Chojniak</b>                                                                                          | 2012 | Entirely off topic |
| <b>P. Lobert, A. Srinivasan, G. V. Shah, S. K. Mukherji</b>                                                                                                                    | 2012 | Entirely off topic |
| <b>A. Balato, N. Balato, M. Megna, A. Raimondo, M. Cantelli, T. Cirillo, C. Patruno</b>                                                                                        | 2012 | Entirely off topic |
| <b>R. Gallagher, J. Keighley, J. Tancabelic, R. Garimella, D. Pinson, K. Templeton, O. Tawfik</b>                                                                              | 2012 | Entirely off topic |
| <b>S. Tabaries, F. Dupuy, Z. Dong, A. Monast, M. G. Annis, J. Spicer, L. E. Ferri, A. Omeroglu, M. Basik, E. Amir, M. Clemons, P. M. Siegela</b>                               | 2012 | Entirely off topic |
| <b>D. L. Kaplan</b>                                                                                                                                                            | 2012 | Entirely off topic |
| <b>J. H. Shubrook</b>                                                                                                                                                          | 2012 | Entirely off topic |
| <b>J. Schreiber, N. Waldburg</b>                                                                                                                                               | 2012 | Entirely off topic |
| <b>A. V. Patel, D. M. Jones, J. C. Hill, R. P. MacDermott</b>                                                                                                                  | 2012 | Entirely off topic |
| <b>S. Gkalpakiotis, P. Arenberger, M. Arenbergerova</b>                                                                                                                        | 2012 | Entirely off topic |
| <b>C. M. Steger, A. Mehmeti, N. Fischler</b>                                                                                                                                   | 2012 | Entirely off topic |
| <b>K. M. Meyer, T. Klink, S. Ugurel, E. B. Brocker</b>                                                                                                                         | 2012 | Entirely off topic |
| <b>P. J. H. Smak Gregoor</b>                                                                                                                                                   | 2012 | Entirely off topic |
| <b>F. Halleck, K. Budde</b>                                                                                                                                                    | 2012 | Entirely off topic |
| <b>H. Andreae Michael, A. Andreae Doerthe</b>                                                                                                                                  | 2012 | Entirely off topic |
| <b>Helen Atherton, Prescilla Sawmynaden, Aziz Sheikh, Azeem Majeed, Josip Car</b>                                                                                              | 2012 | Entirely off topic |
| <b>Michèle Aubin, Anik Giguère, Mélanie Martin, René Verreault, I. Fitch Margaret, Arminée Kazanjian, Pierre-Hugues Carmichael</b>                                             | 2012 | Entirely off topic |
| <b>E. Bastiaannet, C. A. Uyl-De Groot, A. H. Brouwers, E. J. Jagt, O. S. Hoekstra, W. Oyen, F. Verzijlbergen, B. Ooijen, J. F. Thompson, H. J. Hoekstra</b>                    | 2012 | Entirely off topic |
| <b>Francesca Dwamena, Margaret Holmes-Rovner, M. Gauden Carolyn, Sarah Jorgenson, Gelareh Sadigh, Alla Sikorskii, Simon Lewin, C. Smith Robert, John Coffey, Adesuwa Olomu</b> | 2012 | Entirely off topic |
| <b>Yuan Fang, Selvan Gurusamy Kurinchi, Qin Wang, R. Davidson Brian, He Lin, Xiaodong Xie, Chaohua Wang</b>                                                                    | 2012 | Entirely off topic |
| <b>K. Gupta Aditya, Maryse Paquet, Elmer Villanueva, William Brintnell</b>                                                                                                     | 2012 | Entirely off topic |

|                                                                                                                                                                                                                               |      |                    |
|-------------------------------------------------------------------------------------------------------------------------------------------------------------------------------------------------------------------------------|------|--------------------|
| Tejpal Gupta, Sudhir Nair, Pankaj Chaturvedi, Sadhana Kannan                                                                                                                                                                  | 2012 | Entirely off topic |
| S. Hoshimoto, T. Shingai, D. L. Morton, C. Kuo, M. B. Faries, K. Chong, D. Elashoff, H. J. Wang, R. M. Elashoff, D. S. Hoon                                                                                                   | 2012 | Entirely off topic |
| Adam Hurlow, I. Bennett Michael, A. Robb Karen, I. Johnson Mark, H. Simpson Karen, G. Oxberry Stephen                                                                                                                         | 2012 | Entirely off topic |
| Xiao-Qian Li, Qinghui Zhou, Ping Liu Jian, Kun-Ming Tao, Hongyun Chen, Changquan Ling                                                                                                                                         | 2012 | Entirely off topic |
| I. Mishra Shiraz, W. Scherer Roberta, M. Geigle Paula, R. Berlanstein Debra, Ozlem Topaloglu, C. Gotay Carolyn, Claire Snyder                                                                                                 | 2012 | Entirely off topic |
| I. Mishra Shiraz, W. Scherer Roberta, Claire Snyder, M. Geigle Paula, R. Berlanstein Debra, Ozlem Topaloglu                                                                                                                   | 2012 | Entirely off topic |
| G. Monta, C. Caracò, A. Crispo, U. Marone, N. Mozzillo                                                                                                                                                                        | 2012 | Entirely off topic |
| Cathy Payne, J. Wiffen Philip, Suzanne Martin                                                                                                                                                                                 | 2012 | Entirely off topic |
| Joanne Reid, Moyra Mills, Marie Cantwell, R. Cardwell Chris, J. Murray Liam, Michael Donnelly                                                                                                                                 | 2012 | Entirely off topic |
| M. Rubinstein Sidney, B. Terwee Caroline, J. J. Assendelft Willem, R. de Boer Michiel, W. van Tulder Maurits                                                                                                                  | 2012 | Entirely off topic |
| Ewurabena Simpson, Yulia Lin, Simon Stanworth, Janet Birchall, Carolyn Doree, Chris Hyde                                                                                                                                      | 2012 | Entirely off topic |
| Thomy Tonia, Annette Mettler, Nadège Robert, Guido Schwarzer, Jerome Seidenfeld, Olaf Weingart, Chris Hyde, Andreas Engert, Julia Bohlius                                                                                     | 2012 | Entirely off topic |
| Clare van Miert, Rebecca Hill, Leanne Jones                                                                                                                                                                                   | 2012 | Entirely off topic |
| H. G. Verbeek Hans, B. de Groot Jan Willem, J. Sluiter Wim, C. Muller Kobold Anneke, T. M. Plukker John, P. Links Thera                                                                                                       | 2012 | Entirely off topic |
| J. R. Vorst, B. E. Schaafsma, F. P. Verbeek, M. Hutteman, J. S. Mieog, C. W. Lowik, G. J. Liefers, J. V. Frangioni, C. J. Velde, A. L. Vahrmeijer                                                                             | 2012 | Entirely off topic |
| S. Ch'ng, A. Pinna, K. Ioannou, K. Juszczuk, K. Shannon, A. Clifford, R. Uren, J. R. Clark                                                                                                                                    | 2013 | Entirely off topic |
| N. Kim, J. E. Kim, H. K. Choung, M. J. Lee, S. I. Khwarg                                                                                                                                                                      | 2013 | Entirely off topic |
| A. M. Schreiner, J. G. Jones, A. J. Swistel, R. S. Hoda                                                                                                                                                                       | 2013 | Entirely off topic |
| K. Cox, A. Sever, S. Jones, J. Weeks, P. Mills, H. Devalia, D. Fish, P. Jones                                                                                                                                                 | 2013 | Entirely off topic |
| A. C. De Waal, K. K. H. Aben, M. M. Van Rossum, L. A. L. M. Kiemeney                                                                                                                                                          | 2013 | Entirely off topic |
| F. Messeguer, A. Agusti-Mejias, V. Traves, C. Requena, V. Alegre, C. Guillen, V. Oliver, E. Nagore                                                                                                                            | 2013 | Entirely off topic |
| A. Tsianakas, M. R. R. Bohm, V. Getova, D. Metze, N. Eter, T. Spieker, A. Brauningner, T. Luger, M. Schiller, C. Sunderkotter                                                                                                 | 2013 | Entirely off topic |
| B. H. H. Lang, K. P. Wong, C. Y. Cheung, K. Y. Wan, C. Y. Lo                                                                                                                                                                  | 2013 | Entirely off topic |
| K. Saha, G. Raychaudhuri, B. K. Chattopadhyay                                                                                                                                                                                 | 2013 | Entirely off topic |
| P. El Hajj, F. Journe, M. Wiedig, I. Laios, F. Sales, M. D. Galibert, L. C. Van Kempen, A. Spatz, B. Badran, D. Larsimont, A. Awada, G. Ghanem                                                                                | 2013 | Entirely off topic |
| E. Toumbis, C. Stamou, D. Rigopoulos, K. Theodoropoulos, M. Makris                                                                                                                                                            | 2013 | Entirely off topic |
| N. Besic, B. Gazic                                                                                                                                                                                                            | 2013 | Entirely off topic |
| A. L. Shada, L. T. Dengel, G. R. Petroni, M. E. Smolkin, S. Acton, C. L. Slingluff Jr                                                                                                                                         | 2013 | Entirely off topic |
| G. Palmieri, A. Lissia, A. Cossu, P. A. Ascierio, G. Botti, C. Caraco, N. Mozzillo, F. Ayala, A. Anniciello, V. De Giorgi, D. Massi, I. Stanganelli, C. Rubino, G. Palomba, M. C. Sini, A. Manca, M. Colombino                | 2013 | Entirely off topic |
| F. Reyat, D. Hajage, A. Savignoni, J. G. Feron, M. A. Bollet, Y. Kirova, A. Fourquet, J. Y. Pierga, P. Cottu, V. Dieras, V. Fourchette, F. Laki, S. Alran, B. Asselain, A. Vincent-Salomon, B. Sigal-Zafrani, X. Sastre-Garau | 2013 | Entirely off topic |

|                                                                                                                                                                                                       |      |                    |
|-------------------------------------------------------------------------------------------------------------------------------------------------------------------------------------------------------|------|--------------------|
| A. K. S. Salama, N. de Rosa, R. P. Scheri, S. K. Pruitt, J. E. Herndon II,<br>J. Marcello, D. S. Tyler, A. P. Abernethy                                                                               | 2013 | Entirely off topic |
| B. Weide, C. Faller, P. Buttner, A. Pflugfelder, U. Leiter, T. K.<br>Eigentler, J. Bauer, A. Forschner, F. Meier, C. Garbe                                                                            | 2013 | Entirely off topic |
| H. Engin, F. Saylik, C. Bilir                                                                                                                                                                         | 2013 | Entirely off topic |
| B. Shaheen, C. Soon                                                                                                                                                                                   | 2013 | Entirely off topic |
| O. Crende, M. Sabatino, M. Valcarcel, T. Carrascal, P. Riestra, J. A.<br>Lopez-Guerrero, E. Nagore, S. Mandruzzato, E. Wang, F. M.<br>Marincola, F. Vidal-Vanaclocha                                  | 2013 | Entirely off topic |
| P. Guerreschi, J. Kluza, C. Maire, M. Jendoubi, S. Valable, D. Huglo,<br>L. Mortier, P. Marchetti                                                                                                     | 2013 | Entirely off topic |
| C. Tamas, L. Popa, A. Lazar, C. Stanescu, C. Morosanu, D. Radulescu,<br>D. Turliuc                                                                                                                    | 2013 | Entirely off topic |
| N. Nemazannikova, K. Antonas, C. R. Dass                                                                                                                                                              | 2013 | Entirely off topic |
| N. A. Yener, A. Midi, R. Cubuk, A. Orki, C. Onar, A. Ersev, B. Arman                                                                                                                                  | 2013 | Entirely off topic |
| K. E. Brick, K. C. Halling, Y. K. Khan, M. S. Peters                                                                                                                                                  | 2013 | Entirely off topic |
| H. Yamazaki, M. Ogita, N. Kodani, S. Nakamura, H. Inoue, K. Himei,<br>T. Kotsuma, K. Yoshida, Y. Yoshioka, K. Yamashita, H. Udono                                                                     | 2013 | Entirely off topic |
| A. Wainstein, F. Bittencourt, G. Bretas, A. Cherobim, F. Santos, A.<br>Wainstein                                                                                                                      | 2013 | Entirely off topic |
| I. Satzger, L. Marks, S. Klages, M. Kerick, J. Ruschoff, P. Middel, A.<br>Kapp, V. Schacht, B. Volker, B. Timmermann, R. Gutzmer                                                                      | 2013 | Entirely off topic |
| E. Beddowes, U. Laggner, D. Shabir, J. K. Wong, C. Healy, J. L. Geh,<br>S. N. Karagiannis, M. Harries, F. O. Nestle, K. E. Lacy                                                                       | 2013 | Entirely off topic |
| J. Bjohle, J. Bergqvist, J. S. Gronowitz, H. Johansson, L. Carlsson, Z.<br>Einbeigi, B. Linderholm, N. Loman, M. Malmberg, M. Soderberg, M.<br>Sundquist, T. M. Walz, M. Ferno, J. Bergh, T. Hatschek | 2013 | Entirely off topic |
| B. J. Wu, W. P. Li, C. Qian, W. Ding, Z. W. Zhou, H. Jiang                                                                                                                                            | 2013 | Entirely off topic |
| R. Shayan, R. Inder, T. Karnezis, C. Caesar, K. Paavonen, M. W.<br>Ashton, G. B. Mann, G. I. Taylor, M. G. Achen, S. A. Stacker                                                                       | 2013 | Entirely off topic |
| P. De Mozzi, P. Da Forno, N. Yii, K. Harman                                                                                                                                                           | 2013 | Entirely off topic |
| E. Ozdemir, N. Yildirim Poyraz, B. Uzun, T. Turkolmez                                                                                                                                                 | 2013 | Entirely off topic |
| B. Baroudjian, M. Battistella, S. Mourah, G. Hickman, C. Pages, I.<br>Moulonguet, F. Koskas, J. Gaudric, C. Le Maignan, J. Dantal, M.<br>Bagot, A. Petit, C. Lebbe                                    | 2013 | Entirely off topic |
| C. C. Wick, R. P. Rezaee, C. A. Zender                                                                                                                                                                | 2013 | Entirely off topic |
| Elly Brockbank, Fani Kokka, Andrew Bryant, Christophe Pomel,<br>Karina Reynolds                                                                                                                       | 2013 | Entirely off topic |
| Z. J. Cappello, A. C. Augenstein, K. L. Potts, K. M. McMasters, J. M.<br>Bumpous                                                                                                                      | 2013 | Entirely off topic |
| Sylvie Dodin, Claudine Blanchet, Isabelle Marc, Edzard Ernst,<br>Taixiang Wu, Caroline Vaillancourt, Joalee Paquette, Elizabeth<br>Maunsell                                                           | 2013 | Entirely off topic |
| Susan Furness, Gemma Bryan, Roddy McMillan, Sarah Birchenough,<br>V. Worthington Helen                                                                                                                | 2013 | Entirely off topic |
| Barbara Gomes, Natalia Calanzani, Vito Curiale, Paul McCrone, J.<br>Higginson Irene                                                                                                                   | 2013 | Entirely off topic |
| Dragan Ilic, M. Neuberger Molly, Mia Djulbegovic, Philipp Dahm                                                                                                                                        | 2013 | Entirely off topic |
| Athanassios Kyrgidis, Thrasivoulos Tzellos, Simone Mocellin, Zoe<br>Apalla, Aimilios Lallas, Pierluigi Pilati, Alexander Stratigos                                                                    | 2013 | Entirely off topic |
| Peng Lihua, Min Su, Zhou Zejun, Wei Ke, I. Bennett Michael                                                                                                                                            | 2013 | Entirely off topic |
| Inge Wegner, S. Widyahening Indah, W. van Tulder Maurits, E. I.<br>Blomberg Stefan, C. W. de Vet Henrica, Gert Brønfort, M. Bouter Lex,<br>J. van der Heijden Geert                                   | 2013 | Entirely off topic |
| Carola Xander, J. Meerpohl Joerg, Daniel Galandi, Sabine Buroh,<br>Guido Schwarzer, Gerd Antes, Gerhild Becker                                                                                        | 2013 | Entirely off topic |

|                                                                                                                                                                                                                                                                                                                                 |      |                    |
|---------------------------------------------------------------------------------------------------------------------------------------------------------------------------------------------------------------------------------------------------------------------------------------------------------------------------------|------|--------------------|
| Jinlin Yang, Linlin Zhu, Zongying Wu, Yiping Wang                                                                                                                                                                                                                                                                               | 2013 | Entirely off topic |
| Xiaoshu Zhu, Alan Bensoussan, D. McNicol Ewan, Hongfeng Chen,<br>Weidong Lu                                                                                                                                                                                                                                                     | 2013 | Entirely off topic |
| B. Fisher, R. G. Ravdin, R. K. Ausman, N. H. Slack, G. E. Moore, R. J.<br>Noer                                                                                                                                                                                                                                                  | 1968 | No local therapy   |
| C. B. Mendoza, Jr., W. H. Gerwig, Jr., A. L. Watne                                                                                                                                                                                                                                                                              | 1970 | No local therapy   |
| S. Malek-Mansour                                                                                                                                                                                                                                                                                                                | 1973 | No local therapy   |
| G. J. Hill, R. Ruess, R. Berris, G. W. Philpott, P. Parkin                                                                                                                                                                                                                                                                      | 1974 | No local therapy   |
| P. E. Peters                                                                                                                                                                                                                                                                                                                    | 1974 | No local therapy   |
| W. K. Amery, J. Cosemans, H. C. Gooszen, E. Lopes Cardozo, A.<br>Louwagie, J. Stam, J. Swierenga, R. G. Vanderschueren, R. W.<br>Veldhuizen                                                                                                                                                                                     | 1978 | No local therapy   |
| P. Banzet, C. Jacquillat, J. Civatte, A. Puissant, J. Maral, C. Chastang,<br>L. Israel, S. Belaich, J. C. Jourdain, M. Weil, G. Auclerc                                                                                                                                                                                         | 1978 | No local therapy   |
| R. L. Gonzalez, L. E. Spitler, R. W. Sagebiel                                                                                                                                                                                                                                                                                   | 1978 | No local therapy   |
| C. M. Balch, S. J. Soong, T. M. Murad, A. L. Ingalls, W. A. Maddox                                                                                                                                                                                                                                                              | 1979 | No local therapy   |
| C. M. Perez-Mesa                                                                                                                                                                                                                                                                                                                | 1979 | No local therapy   |
| B. Lange, S. Kramer, J. R. Gregg                                                                                                                                                                                                                                                                                                | 1982 | No local therapy   |
| U. Veronesi, J. Adamus, C. Aubert, E. Bajetta, G. Beretta, G.<br>Bonadonna, R. Bufalino, N. Cascinelli, G. Cocconi, J. Durand, J.<br>Marsillac, R. L. Ikonopisov, B. Kiss, F. Lejeune, R. MacKie, G. Madej,<br>H. Mulder, Z. Mechl, G. W. Milton, A. Morabito, H. Peter, J. Priario,<br>E. Paul, P. Rumke, R. Sertoli, R. Tomin | 1982 | No local therapy   |
| A. T. Athens, A. M. Grimaldi                                                                                                                                                                                                                                                                                                    | 1983 | No local therapy   |
|                                                                                                                                                                                                                                                                                                                                 | 1983 | No local therapy   |
| R. K. Oldham, K. A. Foon, A. C. Morgan                                                                                                                                                                                                                                                                                          | 1984 | No local therapy   |
| R. Barnes, D. R. Sweetnam, N. M. Bleehen                                                                                                                                                                                                                                                                                        | 1986 | No local therapy   |
| K. G. Louie, R. F. Ozols, C. E. Myers                                                                                                                                                                                                                                                                                           | 1986 | No local therapy   |
| H. Taniguchi, T. Takahishi, Y. Fujita, M. Sakita, S. Ogita, K. Sawai, T.<br>Yamaguchi, T. Yokota, N. Nakagawa, M. Shimotsuma, S. Kondo                                                                                                                                                                                          | 1987 | No local therapy   |
| C. P. Karakousis, L. J. Emrich                                                                                                                                                                                                                                                                                                  | 1987 | No local therapy   |
| A. Loutfi, A. Shakr, M. Jerry, J. Hanley, H. R. Shibata                                                                                                                                                                                                                                                                         | 1987 | No local therapy   |
| C. Kamby, C. Rose, B. Ejlersen, J. Andersen, N. E. Birkler, L. Rytter,<br>K. W. Andersen, K. Zedeler                                                                                                                                                                                                                            | 1988 | No local therapy   |
| D. Thornes, L. Daly, G. Lynch, H. Browne, A. Tanner, F. Keane, S.<br>O'Loughlin, T. Corrigan, P. Daly, G. Edwards                                                                                                                                                                                                               | 1989 | No local therapy   |
| A. Hasson, L. Requena, J. L. Sarasa                                                                                                                                                                                                                                                                                             | 1990 | No local therapy   |
| H. Fiedler, I. Hetschko, W. Wohlrab, K. D. Wozniak, D. Lübbe, K. M.<br>Taube                                                                                                                                                                                                                                                    | 1990 | No local therapy   |
| S. Sawaguchi, M. Kaneko, J. Uchino, T. Takeda, M. Iwafuchi, S.<br>Matsuyama, H. Takahashi, T. Nakajo, Y. Hoshi, I. Okabe                                                                                                                                                                                                        | 1990 | No local therapy   |
| L. E. Spitler                                                                                                                                                                                                                                                                                                                   | 1991 | No local therapy   |
| T. J. Neal, N. Krasner                                                                                                                                                                                                                                                                                                          | 1992 | No local therapy   |
| D. L. Morton, L. J. Foshag, D. S. Hoon, J. A. Nizze, E. Famatiga, L. A.<br>Wanek, C. Chang, D. G. Davtyan, R. K. Gupta, R. Elashoff                                                                                                                                                                                             | 1992 | No local therapy   |
| B. R. Meisenberg, M. Ross, J. J. Vredenburg, R. Jones, E. J. Shpall,<br>H. F. Seigler, D. M. Coniglio, K. Wu, W. P. Peters                                                                                                                                                                                                      | 1993 | No local therapy   |
| Y. Masai, Y. Nio, M. Tsubono, C. C. Tseng, K. Kawabata, H. Hayashi,<br>S. Ishigami, M. Imamura                                                                                                                                                                                                                                  | 1994 | No local therapy   |
| A. Buzaid, S. S. Legha, C. M. Balch, M. Ross, S. Ring, C. Plager, N. E.<br>Papadopoulos, A. K. el-Naggar, R. S. Benjamin                                                                                                                                                                                                        | 1994 | No local therapy   |
| D. M. Spencer, L. R. Bigler, J. K. Wilkin, R. A. Gams                                                                                                                                                                                                                                                                           | 1994 | No local therapy   |
| E. Mallon, R. P. R. Dawber                                                                                                                                                                                                                                                                                                      | 1994 | No local therapy   |
| O. Kolbl, I. C. Kiricuta, J. Willner, W. Bohndorf                                                                                                                                                                                                                                                                               | 1995 | No local therapy   |
| M. T. Closon, L. Verbeke, J. P. Kains, J. Tijtgat, D. Schallier                                                                                                                                                                                                                                                                 | 1995 | No local therapy   |
| J. Overgaard, D. Gonzalez Gonzalez, M. C. Hulshof, G. Arcangeli, O.                                                                                                                                                                                                                                                             | 1995 | No local therapy   |

|                                                                                                                                                                                                    |      |                  |
|----------------------------------------------------------------------------------------------------------------------------------------------------------------------------------------------------|------|------------------|
| Dahl, O. Mella, S. M. Bentzen                                                                                                                                                                      |      |                  |
| S. Shingaki, I. Suzuki, T. Kobayashi, T. Nakajima                                                                                                                                                  | 1996 | No local therapy |
| N. G. Davidson, J. B. Chick, T. J. Perren, N. Campbell, J. M. Thompson, Y. T. S. Chan                                                                                                              | 1996 | No local therapy |
| C. Gisselbrecht, J. M. Extra, J. P. Lotz, Y. Devaux, M. Janvier, A. M. Peny, L. Guillevin, D. Bremond, M. Delain, R. Herbrecht, E. Lepage, D. Maraninchi                                           | 1996 | No local therapy |
| C. J. Kim, J. K. Taubenberger, T. B. Simonis, D. E. White, S. A. Rosenberg, F. M. Marincola                                                                                                        | 1996 | No local therapy |
| J. M. Kirkwood, M. H. Strawderman, M. S. Ernstoff, T. J. Smith, E. C. Borden, R. H. Blum                                                                                                           | 1996 | No local therapy |
| M. K. Wallack, M. Sivanandham, B. Whooley, K. Ditaranto, A. A. Bartolucci                                                                                                                          | 1996 | No local therapy |
| F. Belli, F. Arienti, J. Sulé-Suso, C. Clemente, L. Mascheroni, A. Cattelan, C. Santantonio, G. F. Gallino, C. Melani, S. Rao, M. P. Colombo, M. Maio, N. Cascinelli, G. Parmiani, C. Sanantonio   | 1997 | No local therapy |
| C. Guiot, E. Madon, D. Allegro, P. G. Pianta, B. Baiotto, P. Gabriele                                                                                                                              | 1998 | No local therapy |
| P. Lyall, K. L. Lynn                                                                                                                                                                               | 1998 | No local therapy |
| M. Airoidi, C. Bumma, O. Bertetto, P. Gabriele, G. Succo, F. Pedani                                                                                                                                | 1998 | No local therapy |
| J. Caubet-Biayna, M. Morey-Mas, J. Ibarra, J. I. Iriarte-Ortabe                                                                                                                                    | 1998 | No local therapy |
| H. S. Koops, M. Vaglini, S. Suci, B. B. Kroon, J. F. Thompson, J. Göhl, A. M. Eggermont, F. Filippo, E. T. Krementz, D. Ruiter, F. J. Lejeune                                                      | 1998 | No local therapy |
| D. Liénard, A. M. Eggermont, B. B. Kroon, H. Schraffordt Koops, F. J. Lejeune                                                                                                                      | 1998 | No local therapy |
| B. Thurner, I. Haendle, C. Roder, D. Dieckmann, P. Keikavoussi, H. Jonuleit, A. Bender, C. Maczek, D. Schreiner, P. von den Driesch, E. B. Brocker, R. M. Steinman, A. Enk, E. Kampgen, G. Schuler | 1999 | No local therapy |
| I. A. Cree, M. H. Neale, N. E. Myatt, P. G. De Takats, P. Hall, J. Grant, C. M. Kurbacher, U. Reinhold, K. Neuber, R. M. MacKie, J. Chana, P. C. Weaver, G. G. Khoury, C. Sartori, P. E. Andreotti | 1999 | No local therapy |
| K. G. Billingsley, J. J. Lewis, D. H. Y. Leung, E. S. Casper, J. M. Woodruff, M. F. Brennan                                                                                                        | 1999 | No local therapy |
| A. M. Lopez, L. Wallace, R. T. Dorr, M. Koff, E. M. Hersh, D. S. Alberts                                                                                                                           | 1999 | No local therapy |
| V. Gebbia, G. Mauceri, A. Testa, M. Tirrito, F. Varvara, A. Cucchiara, N. Borsellino, A. Girlando, M. Ferrara, F. Caruso                                                                           | 1999 | No local therapy |
| D. Liénard, A. M. Eggermont, H. S. Koops, B. Kroon, G. Towse, S. Hiemstra, P. Schmitz, J. Clarke, G. Steinmann, F. Rosenkaimer, F. J. Lejeune                                                      | 1999 | No local therapy |
| A. Ravaud, C. Bedane, L. Geoffrois, T. Lesimple, M. Delaunay                                                                                                                                       | 1999 | No local therapy |
| S. A. Rosenberg, J. C. Yang, D. J. Schwartzentruber, P. Hwu, F. M. Marincola, S. L. Topalian, C. A. Seipp, J. H. Einhorn, D. E. White, S. M. Steinberg                                             | 1999 | No local therapy |
| I. Songun, H. J. Keizer, J. Hermans, P. Klementsich, J. E. Vries, J. A. Wils, J. Bijl, Jhjm Krieken, C. J. H. Velde                                                                                | 1999 | No local therapy |
| S. Kageyama, M. Watanabe, M. Masuya, K. Oishi, N. Katayama, N. Minami, H. Shiku                                                                                                                    | 2000 | No local therapy |
| O. Lyass, B. Uziely, R. Ben-Yosef, D. Tzemach, N. I. Heshing, M. Lotem, G. Brufman, A. Gabizon                                                                                                     | 2000 | No local therapy |
| J. A. Sparano                                                                                                                                                                                      | 2000 | No local therapy |
| Y. Michiwa, M. Earashi, H. Kobayashi, N. Matsuki                                                                                                                                                   | 2001 | No local therapy |
| G. Q. Phan, P. Attia, S. M. Steinberg, D. E. White, S. A. Rosenberg                                                                                                                                | 2001 | No local therapy |
| J. Dvorak, Z. Zoul, B. Melichar, P. Jandik, J. Mergancova, I. Hrnčirova, H. Urminska, J. Petera                                                                                                    | 2001 | No local therapy |
| J. Arends, C. Unger                                                                                                                                                                                | 2001 | No local therapy |

|                                                                                                                                                                                                                                                                                                                                                  |      |                  |
|--------------------------------------------------------------------------------------------------------------------------------------------------------------------------------------------------------------------------------------------------------------------------------------------------------------------------------------------------|------|------------------|
| N. S. Goldstein, M. Armin                                                                                                                                                                                                                                                                                                                        | 2001 | No local therapy |
| F. Cardoso, A. F. Ferreira Filho, J. Crown, S. Dolci, M. Paesmans, A. Riva, A. Leo, M. J. Piccart                                                                                                                                                                                                                                                | 2001 | No local therapy |
| R. O. Dillman, N. M. Barth, L. A. VanderMolen, D. H. Garfield, C. Leon, A. A. O'Connor, K. Mahdavi, S. K. Nayak                                                                                                                                                                                                                                  | 2001 | No local therapy |
| I. Pappo, M. Lotem, M. Klein, R. Orda                                                                                                                                                                                                                                                                                                            | 2001 | No local therapy |
| C. L. Slingluff, G. Yamshchikov, P. Neese, H. Galavotti, S. Eastham, V. H. Engelhard, D. Kittlesen, D. Deacon, S. Hibbitts, W. W. Grosh, G. Petroni, R. Cohen, C. Wiernasz, J. W. Patterson, B. P. Conway, W. G. Ross                                                                                                                            | 2001 | No local therapy |
| H. Waleczek, H. Lukenheimer, R. Gerhards, H. Werchau, W. Kozuschek                                                                                                                                                                                                                                                                               | 2002 | No local therapy |
| G. S. Huang, M. Juretzka, G. Ciaravino, S. Kohler, N. N. H. Teng                                                                                                                                                                                                                                                                                 | 2002 | No local therapy |
| P. Kellokumpu-Lehtinen, A. Lantto, R. Kokko, L. Elomaa, R. Jarvenpaa, R. Lehtinen, C. Blomqvist                                                                                                                                                                                                                                                  | 2002 | No local therapy |
| P. Hersey, A. S. Coates, W. H. McCarthy, J. F. Thompson, R. W. Sillar, R. McLeod, P. G. Gill, B. J. Coventry, A. McMullen, H. Dillon, R. J. Simes                                                                                                                                                                                                | 2002 | No local therapy |
| L. Kretschmer, P. Helmbold, S. Emmert, W. C. Marsch                                                                                                                                                                                                                                                                                              | 2002 | No local therapy |
| T. Yoshikawa, A. Tsuburaya, O. Kobayashi, M. Sairenji, H. Motohashi, Y. Noguchi                                                                                                                                                                                                                                                                  | 2003 | No local therapy |
| G. Fountzilas, E. Razis, D. Tsavdaridis, M. Karina, S. Labropoulos, C. Christodoulou, D. Mavroudis, H. Gogas, V. Georgoulas, D. Skarlos                                                                                                                                                                                                          | 2003 | No local therapy |
| E. J. Johnson, P. M. Crofton, J. O'Neill, A. G. Wilkinson, K. J. McKenzie, F. D. Munro, L. Myles, M. J. Seckl, W. H. B. Wallace                                                                                                                                                                                                                  | 2003 | No local therapy |
| M. Sawaki, Y. Ito, K. Tada, N. Mizunuma, S. Takahashi, N. Horikoshi, F. Kasumi, F. Akiyama, G. Sakamoto, T. Imai, A. Nakao, K. Hatake                                                                                                                                                                                                            | 2004 | No local therapy |
| G. Freyer, A. Lortholary, C. Delcambre, T. Delozier, G. Piot, F. Genin, E. Pujade-Lauraine                                                                                                                                                                                                                                                       | 2004 | No local therapy |
| T. G. Berger, I. Haendle, D. Schrama, M. Luftl, N. Bauer, L. O. Pedersen, B. Schuler-Thurner, W. Hohenberger, P. Thor Straten, G. Schuler, J. C. Becker                                                                                                                                                                                          | 2004 | No local therapy |
| J. C. Martinez, C. C. Otley, S. Euvrard, C. J. Arpey, T. Stasko                                                                                                                                                                                                                                                                                  | 2004 | No local therapy |
| G. Fountzilas, H. P. Kalofonos, U. Dafni, C. Papadimitriou, D. Bafaloukos, P. Papakostas, A. Kalogera-Fountzila, H. Gogas, G. Aravantinos, L. A. Moulopoulos, T. Economopoulos, D. Pectasides, N. Maniadakis, V. Siafaka, E. Briasoulis, C. Christodoulou, D. Tsavdaridis, P. Makrantonakis, E. Razis, P. Kosmidis, D. Skarlos, M. A. Dimopoulos | 2004 | No local therapy |
| B. W. Hancock, K. Wheatley, S. Harris, N. Ives, G. Harrison, J. M. Horsman, M. R. Middleton, N. Thatcher, P. C. Lorigan, J. R. Marsden, L. Burrows, M. Gore                                                                                                                                                                                      | 2004 | No local therapy |
| Sally Lord, Davina Gherzi, Melina Gattellari, Sally Wortley, Nicholas Wilcken, E. Thornton Charlene, John Simes                                                                                                                                                                                                                                  | 2004 | No local therapy |
| P. Robinson, H. Masse, S. Bhalla, A. Kielhorn, M. Aristides, A. Brown, D. Tilden                                                                                                                                                                                                                                                                 | 2004 | No local therapy |
| T. Hoang, R. Xu, J. H. Schiller, P. Bonomi, D. H. Johnson                                                                                                                                                                                                                                                                                        | 2005 | No local therapy |
| M. E. Dudley, J. R. Wunderlich, J. C. Yang, R. M. Sherry, S. L. Topalian, N. P. Restifo, R. E. Royal, U. Kammula, D. E. White, S. A. Mavroukakis, L. J. Rogers, G. J. Gracia, S. A. Jones, D. P. Mngiameli, M. M. Pelletier, J. Gea-Banacloche, M. R. Robinson, D. M. Berman, A. C. Filie, A. Abati, S. A. Rosenberg                             | 2005 | No local therapy |
| M. E. Stein, M. M. Quigley, A. Gershuny, J. Zaidan, N. Siegelmann-Danieli                                                                                                                                                                                                                                                                        | 2005 | No local therapy |
| A. M. Eggermont, S. Suci, R. MacKie, W. Ruka, A. Testori, W. Kruit, C. J. Punt, M. Delauney, F. Sales, G. Groenewegen, D. J. Ruiter, I.                                                                                                                                                                                                          | 2005 | No local therapy |

|                                                                                                                                                                                                                                               |      |                  |
|-----------------------------------------------------------------------------------------------------------------------------------------------------------------------------------------------------------------------------------------------|------|------------------|
| <b>Jagiello, K. Stoitchkov, U. Keilholz, D. Lienard</b>                                                                                                                                                                                       |      |                  |
| Cindy Farquhar, Jane Marjoribanks, Russell Bassar, E. Hetrick Sarah, Anne Lethaby                                                                                                                                                             | 2005 | No local therapy |
| Cindy Farquhar, Jane Marjoribanks, Russell Bassar, Anne Lethaby                                                                                                                                                                               | 2005 | No local therapy |
| U. Keilholz, C. J. Punt, M. Gore, W. Kruit, P. Patel, D. Lienard, J. Thomas, T. M. Proebstle, A. Schmittel, D. Schadendorf, T. Velu, S. Negrier, U. Kleeberg, F. Lehman, S. Suci, A. M. Eggermont                                             | 2005 | No local therapy |
| N. Battelli, C. Massacesi, C. Braconi, A. Pilone, L. Manzione, A. Dinota, S. Cobelli, A. Scanni, F. Sturba, G. Giacomini, D. Morale, F. Giorgi, D. Tummarello, S. Cascinu                                                                     | 2006 | No local therapy |
| N. A. Elimam, A. A. Atra, N. Y. Faye, T. G. Al-Asaad, T. M. Khattab, G. A. Al-Sulami, S. K. Felimban, S. Felimban                                                                                                                             | 2006 | No local therapy |
| H. H. Helgason, C. M. F. Kruijtzter, A. D. R. Huitema, S. G. Marcus, W. W. Ten Bokkel Huinink, M. E. Schot, J. H. Schornagel, J. H. Beijnen, J. H. M. Schellens                                                                               | 2006 | No local therapy |
| J. H. Huang, Z. Liang, P. H. Wu, W. J. Fan, F. J. Zhang, Y. K. Gu, M. Zhao, Y. S. Cheng                                                                                                                                                       | 2006 | No local therapy |
| D. Nitti, J. Wils, J. G. Dos Santos, G. Fountzilias, P. F. Conte, C. Sava, A. Tres, R. C. Coombes, D. Crivellari, A. Marchet, E. Sanchez, J. M. Bliss, J. Homewood, M. L. Couvreur, E. Hall, B. Baron, E. Woods, M. Emson, E. Cutsem, M. Lise | 2006 | No local therapy |
| G. Zeppetella, G. Porzio, F. Aielli                                                                                                                                                                                                           | 2007 | No local therapy |
| D. Gholam, A. Chebib, D. Hauteville, M. P. Bralet, C. Jasmin                                                                                                                                                                                  | 2007 | No local therapy |
| Paulo De Conti, N. Atallah Álvaro, O. Arruda Homero, G. O. Soares Bernardo, P. El Dib Regina, J. Wilt Timothy                                                                                                                                 | 2007 | No local therapy |
| K. A. Varker, J. E. Biber, C. Kefauver, R. Jensen, A. Lehman, D. Young, H. Wu, G. B. Lesinski, K. Kendra, H. X. Chen, M. J. Walker, W. E. Carson                                                                                              | 2007 | No local therapy |
| A. Lazaro, J. Casinello, A. Amoros, M. Heredia, A. Lopez-Alfonso                                                                                                                                                                              | 2008 | No local therapy |
| S. H. Park, E. Nam, J. Park, E. K. Cho, D. B. Shin, J. H. Lee, W. K. Lee, M. Chung, S. I. Lee                                                                                                                                                 | 2008 | No local therapy |
| C. Theodore, I. Skoneczna, I. Bodrogi, M. Leahy, J. M. Kerst, L. Collette, K. Ven, S. Marraud, R. D. T. Oliver                                                                                                                                | 2008 | No local therapy |
| Y. Kikuchi, M. Takano, K. Kudoh, T. Kita, K. Sato                                                                                                                                                                                             | 2008 | No local therapy |
| T. K. Eigentler, P. Radny, A. Hauschild, R. Gutzmer, R. Linse, C. Pföhler, S. N. Wagner, D. Schadendorf, U. Ellwanger, C. Garbe                                                                                                               | 2008 | No local therapy |
| A. Herbertson Rebecca, Chris Karapetis, Tim Price, Niall Tebbutt, Nick Pavlakis                                                                                                                                                               | 2008 | No local therapy |
| L. J. Wirth                                                                                                                                                                                                                                   | 2008 | No local therapy |
| S. Takahagi, H. Noda, A. Kamegashira, N. Madokoro, I. Hori, H. Shindo, S. Mihara, M. Hide                                                                                                                                                     | 2009 | No local therapy |
| G. Bisogno, A. Ferrari, A. Prete, C. Messina, E. Basso, G. Cecchetto, P. Indolfi, G. Scarzello, P. D'Angelo, L. D. Sio, A. D. Cataldo, M. Carli                                                                                               | 2009 | No local therapy |
| M. H. Farhat, N. S. El-Saghir, A. I. Shamseddine                                                                                                                                                                                              | 2009 | No local therapy |
| E. R. Plimack, N. Tannir, E. Lin, B. N. Bekele, E. Jonasch                                                                                                                                                                                    | 2009 | No local therapy |
| N. Kiyota, M. Tahara, S. Kadowaki, N. Fuse, T. Doi, H. Minami, A. Ohtsu                                                                                                                                                                       | 2009 | No local therapy |
| Y. Suzuki, Y. Tokuda, Y. Fujiwara, H. Iwata, Y. Sasaki, S. Saji, K. Aogi, Y. Nambu, A. Suri, T. Saeki, S. Takashima                                                                                                                           | 2009 | No local therapy |
| N. Shinohara, A. Kumagai, K. Kanagawa, S. Maruyama, T. Abe, A. Sazawa, K. Nonomura                                                                                                                                                            | 2009 | No local therapy |
| S. W. Liu, J. G. Guitart, T. M. Kuzel, M. Gandhi, M. Lacouture                                                                                                                                                                                | 2009 | No local therapy |
| S. S. Lin, C. J. Tai, W. R. Lee, J. S. Chu, K. H. Wang                                                                                                                                                                                        | 2009 | No local therapy |
| I. O. Gordon, T. Wade, K. Chin, J. Dickstein, T. F. Gajewski                                                                                                                                                                                  | 2009 | No local therapy |
| M. Davids, A. Charlton, S. S. Ng, M. L. Chong, K. Laubscher, M. Dar, J. Hodge, R. Soong, B. C. Goh                                                                                                                                            | 2009 | No local therapy |

|                                                                                                                                                               |      |                  |
|---------------------------------------------------------------------------------------------------------------------------------------------------------------|------|------------------|
| S. Tribius, S. Kronemann, Y. Kilic, U. Schroeder, S. Hakim, S. E. Schild, D. Rades                                                                            | 2009 | No local therapy |
| J. Padsis, R. Turley, D. Tyler                                                                                                                                | 2010 | No local therapy |
| N. E. C. Schartz, C. Farges, I. Madelaine, H. Bruzzoni, F. Calvo, A. Hoos, C. Lebbe                                                                           | 2010 | No local therapy |
| A. A. Kotsori, S. Dolly, A. Sheri, M. Parton, N. Shaunak, S. Ashley, G. Walsh, S. Johnston, I. E. Smith                                                       | 2010 | No local therapy |
| T. Baba, M. Sato-Matsushita, A. Kanamoto, A. Itoh, N. Oyaizu, Y. Inoue, Y. Kawakami, H. Tahara                                                                | 2010 | No local therapy |
| M. Kimura, T. Tominaga, Y. Takatsuka, M. Toi, R. Abe, H. Koyama, S. Takashima, Y. Nomura, S. Miura, I. Kimijima, H. Tashiro, Y. Ohashi                        | 2010 | No local therapy |
| K. Beer, H. Oakley                                                                                                                                            | 2010 | No local therapy |
| K. C. Yang, Y. Chao, J. C. Luo, J. Y. Kuo, R. C. Lee, A. F. Y. Li, C. P. Li                                                                                   | 2010 | No local therapy |
| L. C. Pagliaro, D. L. Williams, D. Daliani, M. B. Williams, W. Osai, M. Kincaid, S. Wen, P. F. Thall, C. A. Pettaway                                          | 2010 | No local therapy |
| M. Guida, A. Cramarossa, E. Fistola, M. Porcelli, G. Giudice, K. Lubello, G. Colucci                                                                          | 2010 | No local therapy |
| E. Spector, M. J. Franklin, A. M. Truskinovsky, A. Z. Dudek                                                                                                   | 2010 | No local therapy |
| Rick Admiraal, Marcel van der Paardt, Jasmijn Kobes, C. M. Kremer Leontien, Gianni Bisogno, H. M. Merks Johannes                                              | 2010 | No local therapy |
| Fani Kokka, Elly Brockbank, David Oram, Chris Gallagher, Andrew Bryant                                                                                        | 2010 | No local therapy |
| K. M. McMasters, M. J. Edwards, M. I. Ross, D. S. Reintgen, R. C. Martin, M. M. Urist, R. D. Noyes, J. J. Sussman, A. J. Stromberg, C. R. Scoggins            | 2010 | No local therapy |
| Xue Peng, Jing Fu, Hu Lina                                                                                                                                    | 2010 | No local therapy |
| Aihua Tan, Ning Xia, Feng Gao, Zengnan Mo, Yunfei Cao                                                                                                         | 2010 | No local therapy |
| P. H. Cottu, V. Fourchette, A. Vincent-Salomon, I. Kriegel, I. Fromantin                                                                                      | 2011 | No local therapy |
| M. Johannsen, M. Staehler, C. H. Ohlmann, A. Florcken, A. Schmittel, T. Otto, A. Bex, P. Hein, K. Miller, S. Weikert, V. Grunwald                             | 2011 | No local therapy |
| S. Zakaria, K. Y. Lu, V. Nussenblatt, I. Browner                                                                                                              | 2011 | No local therapy |
| Y. F. Wu, T. F. Wang, S. C. Chu, K. P. Huang, C. Y. Yo, S. C. Li, C. C. Lee, R. H. Kao                                                                        | 2011 | No local therapy |
| V. Pachon, M. Lopez, M. A. Vaz, E. Grande, M. J. Blanco                                                                                                       | 2011 | No local therapy |
| A. Hirao, N. Oiso, J. Tsurutani, M. Kimura, M. Watatani, K. Nakagawa, A. Kawada                                                                               | 2011 | No local therapy |
| S. Geiger, J. A. Cnossen, S. Horster, D. Digiola, V. Heinemann, H. J. Stemmler                                                                                | 2011 | No local therapy |
| T. Higashi, R. Nishii, S. Yamada, Y. Nakamoto, K. Ishizu, S. Kawase, K. Togashi, S. Itasaka, M. Hiraoka, T. Misaki, J. Konishi                                | 2011 | No local therapy |
| P. A. Oberholzer, L. Borradori, H. Beltraminelli                                                                                                              | 2011 | No local therapy |
| F. Sora, P. Chiusolo, E. Metafuni, S. Bellesi, S. Giammarco, L. Laurenti, G. Ausoni, G. Zini, A. J. Bayer, B. Mario, G. Leone, S. Sica                        | 2011 | No local therapy |
| C. Biver-Dalle, T. Nguyen, A. Touze, C. Saccomani, S. Penz, S. Cunat-Peultier, M. O. Riou-Gotta, P. Humbert, P. Coursaget, F. Aubin                           | 2011 | No local therapy |
| Susan Furness, Anne-Marie Glenny, V. Worthington Helen, Sue Pavitt, Richard Oliver, E. Clarkson Jan, Michaelina Macluskey, K. W. Chan Kelvin, I. Conway David | 2011 | No local therapy |
| Krishnayan Haldar, Kezia Gaitskell, Andrew Bryant, Shibani Nicum, Sean Kehoe, Jo Morrison                                                                     | 2011 | No local therapy |
| C. van Dalen Elvira, W. van As Jorrit, Beatriz de Camargo                                                                                                     | 2011 | No local therapy |
| Elke Wolf, Stefania Milazzo, Katja Boehm, Marcel Zwahlen, Markus Horneber                                                                                     | 2011 | No local therapy |



|                                                                                                                                                                         |      |                                          |
|-------------------------------------------------------------------------------------------------------------------------------------------------------------------------|------|------------------------------------------|
| C. Mecca, A. Ponzetti, V. Caliendo, L. Ciuffreda, P. Lista                                                                                                              | 2012 | No local therapy                         |
| S. Leboulleux, L. Bastholt, T. Krause, C. de la Fouchardiere, J. Tennvall, A. Awada, J. M. Gomez, F. Bonichon, L. Leenhardt, C. Soufflet, M. Licour, M. J. Schlumberger | 2012 | No local therapy                         |
| V. Huang, D. Hepper, M. Anadkat, L. Cornelius                                                                                                                           | 2012 | No local therapy                         |
| K. M. Miles, B. Gillard, F. Kuhnert, G. Thurston, A. S. Lalani, R. Pili                                                                                                 | 2012 | No local therapy                         |
| M. Zink, S. Angermeier, N. Prasnikar, K. Caca, N. Schwella                                                                                                              | 2012 | No local therapy                         |
| J. T. Lin, G. M. Lai, T. H. Chang, M. T. Liu, C. P. Bi, J. W. Wang, M. K. Chen                                                                                          | 2012 | No local therapy                         |
| S. Wilgenhof, S. D. Four, H. Everaert, B. Neyns                                                                                                                         | 2012 | No local therapy                         |
| M. Schlaak, T. Podewski, W. Von Bartenwerffer, N. Kreuzberg, C. Bangard, C. Mauch, P. Kurschat                                                                          | 2012 | No local therapy                         |
| W. R. Robinson, J. Beyer, S. Griffin, P. Kanjanavaikoon                                                                                                                 | 2012 | No local therapy                         |
| U. Hille, P. Soergel, F. Langer, C. Schippert, L. Makowski, P. Hillemanns                                                                                               | 2012 | No local therapy                         |
| A. C. Seghers, S. Wilgenhof, C. Lebbe, B. Neyns                                                                                                                         | 2012 | No local therapy                         |
| E. Cesca, G. Garetto, E. Frascella, S. Cesaro, P. Dall'Igna, G. Cecchetto                                                                                               | 2012 | No local therapy                         |
| R. Nakamori, Y. Omoto, K. Yamanaka, K. Habe, I. Kurokawa, H. Mizutani                                                                                                   | 2012 | No local therapy                         |
| H. Yoshioka, K. Tsubouchi, T. Ishida                                                                                                                                    | 2012 | No local therapy                         |
| T. Nakagawa, K. Sato, M. Moriwaki, R. Wada, A. Arakawa, M. Saito, F. Kasumi                                                                                             | 2012 | No local therapy                         |
| Mo'iad Alazzam, John Tidy, W. Hancock Barry, Raymond Osborne, A. Lawrie Theresa                                                                                         | 2012 | No local therapy                         |
| Mo'iad Alazzam, John Tidy, Raymond Osborne, Robert Coleman, W. Hancock Barry, A. Lawrie Theresa                                                                         | 2012 | No local therapy                         |
| Xingzhong Jin, Julieta Ruiz Beguerie, Man-yeun Sze Daniel, C. F. Chan Godfrey                                                                                           | 2012 | No local therapy                         |
| Nick Johnson, Tracie Miles, Paul Cornes, Edward Gilby                                                                                                                   | 2012 | No local therapy                         |
| Kate Scatchard, L. Forrest Jennifer, Maxine Flubacher, Paul Cornes, Chris Williams                                                                                      | 2012 | No local therapy                         |
| A. M. Zhang, Y. Fan, X. X. Wang, Q. C. Xie, J. G. Sun, Z. T. Chen, B. Zhu                                                                                               | 2012 | No local therapy                         |
| Y. Y. Janjigian, M. Capanu, C. M. Gromisch, D. P. Kelsen, G. Y. Ku, K. T. Brown, M. Schattner, D. H. Ison, D. B. Solit, M. F. Berger, E. Vakiani                        | 2013 | No local therapy                         |
| L. Boussemart, C. Boivin, J. Claveau, Y. G. Tao, G. Tomasic, E. Routier, C. Mateus, E. Deutsch, C. Robert                                                               | 2013 | No local therapy                         |
| D. Durak, A. Vanegas, I. Moll                                                                                                                                           | 2013 | No local therapy                         |
| N. Onoda, H. Kawajiri, S. Kashiwagi, M. Nakamura, T. Takashima, M. Osawa, K. Wakasa, T. Ishikawa, K. Hirakawa                                                           | 2013 | No local therapy                         |
| A. Iarrobino, J. L. Messina, R. Kudchadkar, V. K. Sondak                                                                                                                | 2013 | No local therapy                         |
| J. A. Stigt, M. F. Boomsma, W. H. De Vos Tot Nederveen Cappel                                                                                                           | 2013 | No local therapy                         |
| B. de Castria Tiago, M. K. da Silva Edina, F. T. Gois Accio, Rachel Riera                                                                                               | 2013 | No local therapy                         |
| Frank Peinemann, A. Smith Lesley, Carmen Bartel                                                                                                                         | 2013 | No local therapy                         |
| Ling Wei Mao, Deying Kang, Lijia Gu, Meng Qiu, Liao Zhengyin, Yanming Mu                                                                                                | 2013 | No local therapy                         |
| A. P. Ferry                                                                                                                                                             | 1972 | Non-cutaneous metastasis (ie lymph node) |
| G. R. Frolow, L. Shapiro, M. H. Brownstein                                                                                                                              | 1975 | Non-cutaneous metastasis (ie lymph node) |
| I. Dahl                                                                                                                                                                 | 1976 | Non-cutaneous metastasis (ie lymph node) |
| D. L. Morton, F. R. Eilber, E. C. Holmes, K. P. Ramming                                                                                                                 | 1978 | Non-cutaneous metastasis (ie lymph node) |

|                                                                                                                               |      |                                          |
|-------------------------------------------------------------------------------------------------------------------------------|------|------------------------------------------|
| <b>H. L. Evans, D. Su, J. L. Smith, R. K. Winkelmann</b>                                                                      | 1979 | Non-cutaneous metastasis (ie lymph node) |
| <b>C. P. Karakousis, L. Stahl, R. Moore, E. D. Holyoke</b>                                                                    | 1980 | Non-cutaneous metastasis (ie lymph node) |
| <b>S. C. Van der Putte, J. Toonstra, R. A. De Weger, J. A. Van Unnik</b>                                                      | 1982 | Non-cutaneous metastasis (ie lymph node) |
| <b>L. Israel, R. Samak, R. Edelstein, J. Amouroux, J. P. Battesti, G. de Saint Florent</b>                                    | 1982 | Non-cutaneous metastasis (ie lymph node) |
| <b>T. F. Warner, G. Reza Hafez</b>                                                                                            | 1982 | Non-cutaneous metastasis (ie lymph node) |
| <b>K. C. Podratz, T. A. Gaffey, R. E. Symmonds, K. L. Johansen, P. C. O'Brien</b>                                             | 1983 | Non-cutaneous metastasis (ie lymph node) |
| <b>T. Hattori, M. Niimoto, T. Toge, M. Oride, A. Nakao, K. Yoshinaka</b>                                                      | 1983 | Non-cutaneous metastasis (ie lymph node) |
| <b>M. S. Piver, J. J. Barlow, V. Vongtama, L. Blumenson</b>                                                                   | 1983 | Non-cutaneous metastasis (ie lymph node) |
| <b>R. H. Henderson, J. T. Parsons, L. Morgan, R. R. Million</b>                                                               | 1984 | Non-cutaneous metastasis (ie lymph node) |
| <b>H. Goepfert, D. Remmler, E. Silva, B. Wheeler</b>                                                                          | 1984 | Non-cutaneous metastasis (ie lymph node) |
| <b>N. Okada, J. Ota, K. Sato, Y. Kitano</b>                                                                                   | 1984 | Non-cutaneous metastasis (ie lymph node) |
| <b>R. K. Sibley, L. P. Dehner, J. Rosai</b>                                                                                   | 1985 | Non-cutaneous metastasis (ie lymph node) |
| <b>R. Whittington, M. E. Browning, G. R. Farrell, A. Miremadi</b>                                                             | 1986 | Non-cutaneous metastasis (ie lymph node) |
| <b>L. Shih, D. B. Hawkins</b>                                                                                                 | 1987 | Non-cutaneous metastasis (ie lymph node) |
| <b>A. Kuhn, W. Groth, H. Gartmann, G. K. Steigleder</b>                                                                       | 1988 | Non-cutaneous metastasis (ie lymph node) |
| <b>S. E. Singletary, R. Shallenberger, V. F. Guinee, C. M. McBride</b>                                                        | 1988 | Non-cutaneous metastasis (ie lymph node) |
| <b>R. Valdagni, M. Amichetti, G. Pani</b>                                                                                     | 1988 | Non-cutaneous metastasis (ie lymph node) |
| <b>A. Calabro, S. E. Singletary, C. M. Balch</b>                                                                              | 1989 | Non-cutaneous metastasis (ie lymph node) |
| <b>D. J. Cole</b>                                                                                                             | 1989 | Non-cutaneous metastasis (ie lymph node) |
| <b>J. C. Chu, L. R. Coia, D. Aziz, P. M. Stafford</b>                                                                         | 1991 | Non-cutaneous metastasis (ie lymph node) |
| <b>H. Ahlman, B. Wangberg, S. Jansson, O. Stenqvist, K. Geterud, U. Tylen, K. Caidahl, T. Schersten, L. E. Tisell</b>         | 1991 | Non-cutaneous metastasis (ie lymph node) |
| <b>P. Hersey</b>                                                                                                              | 1992 | Non-cutaneous metastasis (ie lymph node) |
| <b>J. J. Body</b>                                                                                                             | 1992 | Non-cutaneous metastasis (ie lymph node) |
| <b>N. Cascinelli, F. Belli</b>                                                                                                | 1992 | Non-cutaneous metastasis (ie lymph node) |
| <b>P. Hersey</b>                                                                                                              | 1993 | Non-cutaneous metastasis (ie lymph node) |
| <b>M. Pawlicki, M. Jo?ca, K. Krzemieniecki, B. Zuchowska-Vogelgesang</b>                                                      | 1993 | Non-cutaneous metastasis (ie lymph node) |
| <b>S. Suster, T. Y. Wong</b>                                                                                                  | 1994 | Non-cutaneous metastasis (ie lymph node) |
| <b>S. J. Andrews, B. T. Williams, P. D. DePriest, H. H. Gallion, J. E. Hunter, S. L. Buckley, R. J. Kryscio, J. R. Nagell</b> | 1994 | Non-cutaneous metastasis (ie lymph node) |

|                                                                                                                                                                 |      |                                          |
|-----------------------------------------------------------------------------------------------------------------------------------------------------------------|------|------------------------------------------|
| <b>T. L. Phillips, C. B. Scott, S. A. Leibel, M. Rotman, I. J. Weigensberg</b>                                                                                  | 1995 | Non-cutaneous metastasis (ie lymph node) |
| <b>M. J. Wareing, S. A. Vaughan-Jones, D. H. McGibbon</b>                                                                                                       | 1996 | Non-cutaneous metastasis (ie lymph node) |
| <b>S. Takayasu, M. Yoshiyama, S. Kurata, H. Terashi</b>                                                                                                         | 1996 | Non-cutaneous metastasis (ie lymph node) |
| <b>M. I. Colome-Grimmer, H. L. Evans</b>                                                                                                                        | 1996 | Non-cutaneous metastasis (ie lymph node) |
| <b>M. Gerdis, C. Gross, P. J. Milman</b>                                                                                                                        | 1996 | Non-cutaneous metastasis (ie lymph node) |
| <b>S. Blandamura, G. Altavilla, C. Antonini, M. Marchetti, M. Piazza</b>                                                                                        | 1997 | Non-cutaneous metastasis (ie lymph node) |
| <b>G. Klautke, H. Seegenschmiedt, P. Martus, L. W. Brady, R. Sauer</b>                                                                                          | 1997 | Non-cutaneous metastasis (ie lymph node) |
| <b>J. O. DelCharco, W. M. Mendenhall, J. T. Parsons, S. P. Stringer, N. J. Cassisi, N. P. Mendenhall</b>                                                        | 1998 | Non-cutaneous metastasis (ie lymph node) |
| <b>S. Kyzer, R. Koren, B. Klein, C. Chaimoff</b>                                                                                                                | 1998 | Non-cutaneous metastasis (ie lymph node) |
| <b>W. Dobrowsky, J. Naudé, J. Widder, E. Dobrowsky, W. Millesi, R. Pavelka, C. Grasl, M. Reichel</b>                                                            | 1998 | Non-cutaneous metastasis (ie lymph node) |
| <b>B. Y. Wang, W. Lawson, R. A. Robinson, B. Perez-Ordóñez, M. Brandwein</b>                                                                                    | 1999 | Non-cutaneous metastasis (ie lymph node) |
| <b>S. H. Fernandez</b>                                                                                                                                          | 1999 | Non-cutaneous metastasis (ie lymph node) |
| <b>V. L. M. Vander Poorten, A. J. M. Balm, F. J. M. Hilgers, B. Tan, B. M. Loftus-Coll, R. B. Keus, F. E. Van Leeuwen, A. A. M. Hart</b>                        | 1999 | Non-cutaneous metastasis (ie lymph node) |
| <b>E. Woll, A. Bedikian, S. S. Legha</b>                                                                                                                        | 1999 | Non-cutaneous metastasis (ie lymph node) |
| <b>Y. P. Talmi, Z. Horowitz, M. Wolf, J. Kronenberg</b>                                                                                                         | 1999 | Non-cutaneous metastasis (ie lymph node) |
| <b>G. F. Nash, K. M. Reddy, R. A. D. Booth</b>                                                                                                                  | 1999 | Non-cutaneous metastasis (ie lymph node) |
| <b>J. McQuay Henry, Sally Collins, Dawn Carroll, R. Andrew Moore</b>                                                                                            | 1999 | Non-cutaneous metastasis (ie lymph node) |
| <b>S. Regauer, C. Beham-Schmid, M. Okcu, E. Hartner, S. Mannweiler</b>                                                                                          | 2000 | Non-cutaneous metastasis (ie lymph node) |
| <b>M. Weekly, D. D. Lydiatt, W. M. Lydiatt, S. C. Baker, S. L. Johansson</b>                                                                                    | 2000 | Non-cutaneous metastasis (ie lymph node) |
| <b>M. Lorenz, H. H. Müller</b>                                                                                                                                  | 2000 | Non-cutaneous metastasis (ie lymph node) |
| <b>L. G. Ng, S. K. Yip, P. H. Tan</b>                                                                                                                           | 2001 | Non-cutaneous metastasis (ie lymph node) |
| <b>B. K. Durani, H. Kurzen, A. Jaekel, N. Kuner, H. Naehar, W. Hartschuh</b>                                                                                    | 2001 | Non-cutaneous metastasis (ie lymph node) |
| <b>L. Kretschmer, K. P. Preusser, C. Neumann</b>                                                                                                                | 2002 | Non-cutaneous metastasis (ie lymph node) |
| <b>C. J. O'Brien, E. B. McNeil, J. D. McMahon, I. Pathak, C. S. Lauer, M. A. Jackson</b>                                                                        | 2002 | Non-cutaneous metastasis (ie lymph node) |
| <b>S. Hoshi, H. Jokura, H. Nakamura, I. Shintaku, C. Ohyama, M. Satoh, S. Saito, A. Fukuzaki, S. Orikasa, T. Yoshimoto</b>                                      | 2002 | Non-cutaneous metastasis (ie lymph node) |
| <b>B. Dréno, J. M. Nguyen, A. Khammari, M. C. Pandolfino, M. H. Tessier, S. Bercegeay, A. Cassidanius, P. Lemarre, S. Billaudel, N. Labarrière, F. Jotereau</b> | 2002 | Non-cutaneous metastasis (ie lymph node) |
| <b>J. King, J. R. M. Caplehorn, J. K. Seifert, A. P. Preketes, P. R. Clingan, D. L. Morris</b>                                                                  | 2002 | Non-cutaneous metastasis (ie lymph node) |
| <b>S. K. Sarkar, S. Sarkar, B. Pahari, D. Majumdar</b>                                                                                                          | 2002 | Non-cutaneous metastasis (ie lymph node) |

|                                                                                                                                                                                                                               |      |                                                   |
|-------------------------------------------------------------------------------------------------------------------------------------------------------------------------------------------------------------------------------|------|---------------------------------------------------|
| <b>Man Sze Wai, Mike Shelley, Ines Held, Malcolm Mason</b>                                                                                                                                                                    | 2002 | node)<br>Non-cutaneous metastasis (ie lymph node) |
| <b>T. H. Tai, E. Yu, P. Dickof, G. Beck, J. Tonita, T. Ago, D. Skarsgard, M. Schmidt, M. Schmid, J. S. Liem</b>                                                                                                               | 2002 | Non-cutaneous metastasis (ie lymph node)          |
| <b>S. Tabatabaei, W. S. McDougal</b>                                                                                                                                                                                          | 2003 | Non-cutaneous metastasis (ie lymph node)          |
| <b>C. Champallou, J. P. Basuyau, C. Veyret, P. Chinet, M. Debled, A. Chevrier, M. H. Grongnet, P. Brunelle</b>                                                                                                                | 2003 | Non-cutaneous metastasis (ie lymph node)          |
| <b>D. N. MacKenzie, C. S. F. McCormick, R. J. Morris</b>                                                                                                                                                                      | 2003 | Non-cutaneous metastasis (ie lymph node)          |
| <b>R. J. I. Colville, I. G. Camilleri, N. R. McLean, J. V. Soames</b>                                                                                                                                                         | 2003 | Non-cutaneous metastasis (ie lymph node)          |
| <b>F. Mornex, L. Thomas, P. Mohr, A. Hauschild, M. M. Delaunay, T. Lesimple, W. Tilgen, B. N. Bui, B. Guillot, J. Ulrich, S. Bourdin, M. Mousseau, D. Cupissol, M. E. Bonnetterre, C. Gislain, R. J. Bensadoun, M. Clavel</b> | 2003 | Non-cutaneous metastasis (ie lymph node)          |
| <b>M. T. Ballo, G. K. Zagars, J. E. Gershenwald, J. E. Lee, P. F. Mansfield, K. B. Kim, L. H. Camacho, P. Hwu, M. I. Ross</b>                                                                                                 | 2004 | Non-cutaneous metastasis (ie lymph node)          |
| <b>A. Zembowicz, J. A. Carney, M. C. Mihm</b>                                                                                                                                                                                 | 2004 | Non-cutaneous metastasis (ie lymph node)          |
| <b>G. Gruber, M. Ciriolo, H. J. Altermatt, S. Aebi, G. Berclaz, R. H. Greiner</b>                                                                                                                                             | 2004 | Non-cutaneous metastasis (ie lymph node)          |
| <b>N. Audet, C. E. Palme, P. J. Gullane, R. W. Gilbert, D. H. Brown, J. Irish, P. Neligan</b>                                                                                                                                 | 2004 | Non-cutaneous metastasis (ie lymph node)          |
| <b>Z. R. Cohen, D. Suki, J. S. Weinberg, E. Marmor, F. F. Lang, D. M. Gershenson, R. Sawaya</b>                                                                                                                               | 2004 | Non-cutaneous metastasis (ie lymph node)          |
| <b>M. Weintraub, A. I. Bloom, E. Gross, S. Revel-Vilk, S. Shahroor, B. Z. Koplewitz, A. I. Freeman</b>                                                                                                                        | 2004 | Non-cutaneous metastasis (ie lymph node)          |
| <b>G. Hart Michael, Robert Grant, Mark Walker, O. Dickinson Heather</b>                                                                                                                                                       | 2004 | Non-cutaneous metastasis (ie lymph node)          |
| <b>U. R. Kleeberg, S. Suciu, E. B. Bröcker, D. J. Ruiter, C. Chartier, D. Liénard, J. Marsden, D. Schadendorf, A. M. Eggermont</b>                                                                                            | 2004 | Non-cutaneous metastasis (ie lymph node)          |
| <b>G. Minghua, G. Zhiyuan, J. Zhun, C. Han</b>                                                                                                                                                                                | 2005 | Non-cutaneous metastasis (ie lymph node)          |
| <b>E. Munzone, F. Nole, G. Sanna, A. Goldhirsch</b>                                                                                                                                                                           | 2005 | Non-cutaneous metastasis (ie lymph node)          |
| <b>X. Tomas, C. Conill, A. Combalia, J. Pomes, T. Castel, C. Nicolau</b>                                                                                                                                                      | 2005 | Non-cutaneous metastasis (ie lymph node)          |
| <b>D. H. Kim, J. A. Murovic, R. L. Tiel, G. Moes, D. G. Kline</b>                                                                                                                                                             | 2005 | Non-cutaneous metastasis (ie lymph node)          |
| <b>Y. L. Chung, J. J. M. Jian, S. H. Cheng, C. I. Hsieh, T. D. Tan, H. J. Chang, C. F. Hung, C. F. Horng, T. Soong, M. H. Tsou</b>                                                                                            | 2005 | Non-cutaneous metastasis (ie lymph node)          |
| <b>M. J. Veness, G. J. Morgan, C. E. Palme, V. GebSKI</b>                                                                                                                                                                     | 2005 | Non-cutaneous metastasis (ie lymph node)          |
| <b>C. Casali, A. Stefani, P. Natali, G. Rossi, U. Morandi</b>                                                                                                                                                                 | 2005 | Non-cutaneous metastasis (ie lymph node)          |
| <b>A. A. N. Giagounidis, M. Heinsch, R. U. Von Barany, R. Erlemann, C. Aul</b>                                                                                                                                                | 2005 | Non-cutaneous metastasis (ie lymph node)          |
| <b>Nita Patel, F. Lester Jason, Bernadette Coles, Fergus Macbeth</b>                                                                                                                                                          | 2005 | Non-cutaneous metastasis (ie lymph node)          |
| <b>N. J. Pease, A. Edwards, L. J. Moss</b>                                                                                                                                                                                    | 2005 | Non-cutaneous metastasis (ie lymph node)          |
| <b>G. Hall, A. Duncan, R. Azurdia, N. Leonard</b>                                                                                                                                                                             | 2006 | Non-cutaneous metastasis (ie lymph node)          |
| <b>S. Ch'ng, A. Maitra, R. Lea, H. Brasch, S. T. Tan</b>                                                                                                                                                                      | 2006 | Non-cutaneous metastasis (ie lymph node)          |

|                                                                                                                                                                                                                                                         |      |                                          |
|---------------------------------------------------------------------------------------------------------------------------------------------------------------------------------------------------------------------------------------------------------|------|------------------------------------------|
| <b>T. M. Pawlik, D. Zorzi, E. K. Abdalla, B. M. Clary, J. E. Gershenwald, M. I. Ross, T. A. Aloia, S. A. Curley, L. H. Camacho, L. Capussotti, D. Elias, J. N. Vauthey</b>                                                                              | 2006 | Non-cutaneous metastasis (ie lymph node) |
| <b>D. Lawes, A. Chopada, A. Gilliams, W. Lees, I. Taylor</b>                                                                                                                                                                                            | 2006 | Non-cutaneous metastasis (ie lymph node) |
| <b>D. C. Betticher, S. F. Hsu Schmitz, M. Totsch, E. Hansen, C. Joss, C. Von Briel, R. A. Schmid, M. Pless, J. Habicht, A. D. Roth, A. Spiliopoulos, R. Stahel, W. Weder, R. Stupp, F. Egli, M. Furrer, H. Honegger, M. Wernli, T. Cerny, H. B. Ris</b> | 2006 | Non-cutaneous metastasis (ie lymph node) |
| <b>L. J. Verhey, C. C. Chen, P. Chapman, J. Loeffler, W. T. Curry</b>                                                                                                                                                                                   | 2006 | Non-cutaneous metastasis (ie lymph node) |
| <b>J. A. Woolgar</b>                                                                                                                                                                                                                                    | 2006 | Non-cutaneous metastasis (ie lymph node) |
| <b>M. Sotodeh, W. van den Bosch, J. Keunen, D. Paridaens</b>                                                                                                                                                                                            | 2006 | Non-cutaneous metastasis (ie lymph node) |
| <b>E. Gallerani, M. Ciriolo, C. Rossini, F. Cavalli</b>                                                                                                                                                                                                 | 2007 | Non-cutaneous metastasis (ie lymph node) |
| <b>T. Carling, D. Pan, S. Ariyan, D. Narayan, C. Truini</b>                                                                                                                                                                                             | 2007 | Non-cutaneous metastasis (ie lymph node) |
| <b>S. H. Li, M. T. Chen, Y. J. Chen, S. L. Wang, W. Chang-Yu</b>                                                                                                                                                                                        | 2007 | Non-cutaneous metastasis (ie lymph node) |
| <b>K. Uka, H. Aikata, S. Yakaki, H. Shirakawa, S. C. Jeong, K. Yamashina, A. Hiramatsu, H. Kodama, S. Takahashi, K. Chayama</b>                                                                                                                         | 2007 | Non-cutaneous metastasis (ie lymph node) |
| <b>H. Saito, T. Osaki, D. Murakami, T. Sakamoto, S. Kanaji, S. Ohro, S. Tatebe, S. Tsujitani, M. Ikeguchi</b>                                                                                                                                           | 2007 | Non-cutaneous metastasis (ie lymph node) |
| <b>R. Koga, J. Yamamoto, S. Ohyama, A. Saiura, M. Seki, Y. Seto, T. Yamaguchi</b>                                                                                                                                                                       | 2007 | Non-cutaneous metastasis (ie lymph node) |
| <b>R. Hodgson, M. A. Fink, R. M. Jones</b>                                                                                                                                                                                                              | 2007 | Non-cutaneous metastasis (ie lymph node) |
| <b>J. Lindegaard</b>                                                                                                                                                                                                                                    | 2007 | Non-cutaneous metastasis (ie lymph node) |
| <b>T. Moriya, W. Kimura, I. Hirai, M. Mizutani, T. Yamamoto, R. Toya, M. Kamiga, A. Fuse</b>                                                                                                                                                            | 2007 | Non-cutaneous metastasis (ie lymph node) |
| <b>A. Khammari, J. M. Nguyen, M. C. Pandolfino, G. Quereux, A. Brocard, S. Bercegeay, A. Cassidanius, P. Lemarre, C. Volteau, N. Labarrière, F. Jotereau, B. Dréno</b>                                                                                  | 2007 | Non-cutaneous metastasis (ie lymph node) |
| <b>R. W. Hinerman, D. J. Indelicato, R. J. Amdur, C. G. Morris, J. W. Werning, M. Vaysberg, J. Kirwan, W. M. Mendenhall</b>                                                                                                                             | 2008 | Non-cutaneous metastasis (ie lymph node) |
| <b>N. Penel, A. Hollebecque, C. Maynou, J. Dewaele, M. Jasserand, R. Beuscart, M. H. Vieillard</b>                                                                                                                                                      | 2008 | Non-cutaneous metastasis (ie lymph node) |
| <b>E. E. Rutherford, J. E. I. Cast, D. J. Breen</b>                                                                                                                                                                                                     | 2008 | Non-cutaneous metastasis (ie lymph node) |
| <b>C. Garbe, P. Radny, R. Linse, R. Dummer, R. Gutzmer, J. Ulrich, R. Stadler, M. Weichenthal, T. Eigentler, U. Ellwanger, A. Hauschild</b>                                                                                                             | 2008 | Non-cutaneous metastasis (ie lymph node) |
| <b>I. Madani, L. Vakaet, K. Bonte, T. Boterberg, W. Neve</b>                                                                                                                                                                                            | 2008 | Non-cutaneous metastasis (ie lymph node) |
| <b>G. Massi, V. G. Vellone, C. Pagliarello, G. Fabrizi</b>                                                                                                                                                                                              | 2009 | Non-cutaneous metastasis (ie lymph node) |
| <b>D. Pectasides, A. Psyrris, K. Pliarchopoulou, T. Floros, G. Papaxoinis, M. Skondra, G. Papatsibas, A. Macheras, G. Athanasas, P. Arapantoni-Datioti, T. Economopoulos</b>                                                                            | 2009 | Non-cutaneous metastasis (ie lymph node) |
| <b>J. A. Woolgar, G. L. Hall</b>                                                                                                                                                                                                                        | 2009 | Non-cutaneous metastasis (ie lymph node) |
| <b>M. R. Becker, T. Gaiser</b>                                                                                                                                                                                                                          | 2009 | Non-cutaneous metastasis (ie lymph node) |

|                                                                                                                                                                                                                                                      |      |                                          |
|------------------------------------------------------------------------------------------------------------------------------------------------------------------------------------------------------------------------------------------------------|------|------------------------------------------|
| <b>A. L. Wong, N. Chou, K. M. Lee, B. W. Ang, C. L. Cheng, S. C. Lee</b>                                                                                                                                                                             | 2009 | Non-cutaneous metastasis (ie lymph node) |
| <b>A. Fusi, S. Collette, A. Busse, S. Suci, A. Rietz, M. Santinami, W. H. Kruit, A. Testori, C. J. Punt, A. G. Dalglish, A. Spatz, A. M. Eggermont, U. Keilholz</b>                                                                                  | 2009 | Non-cutaneous metastasis (ie lymph node) |
| <b>Selvan Gurusamy Kurinchi, Viniyendra Pamecha, Dinesh Sharma, R. Davidson Brian</b>                                                                                                                                                                | 2009 | Non-cutaneous metastasis (ie lymph node) |
| <b>Selvan Gurusamy Kurinchi, Rajarajan Ramamoorthy, Dinesh Sharma, R. Davidson Brian</b>                                                                                                                                                             | 2009 | Non-cutaneous metastasis (ie lymph node) |
| <b>K. Scheller, C. Scheller, S. Becker, H. J. Holzhausen, J. Schubert</b>                                                                                                                                                                            | 2010 | Non-cutaneous metastasis (ie lymph node) |
| <b>C. M. Magro, A. N. Crowson, M. C. Mihm, Jr., K. Gupta, M. J. Walker, G. Solomon</b>                                                                                                                                                               | 2010 | Non-cutaneous metastasis (ie lymph node) |
| <b>S. J. Turner, G. J. Morgan, C. E. Palme, M. J. Veness</b>                                                                                                                                                                                         | 2010 | Non-cutaneous metastasis (ie lymph node) |
| <b>L. Deeb, P. Hindy, Z. Wadi, M. Win, G. Fruchter</b>                                                                                                                                                                                               | 2010 | Non-cutaneous metastasis (ie lymph node) |
| <b>R. Diaz, P. Moral, M. Fonfria, M. De Juan, N. Mancheno, A. Tormo</b>                                                                                                                                                                              | 2010 | Non-cutaneous metastasis (ie lymph node) |
| <b>G. Folprecht, T. Gruenberger, W. O. Bechstein, H. R. Raab, F. Lordick, J. T. Hartmann, H. Lang, A. Frilling, J. Stoehlmacher, J. Weitz, R. Konopke, C. Stroszczyński, T. Liersch, D. Ockert, T. Herrmann, E. Goekkurt, F. Parisi, C. H. Köhne</b> | 2010 | Non-cutaneous metastasis (ie lymph node) |
| <b>B. Ansari, M. J. Morton, D. L. Adamczyk, K. N. Jones, J. K. Brodt, A. C. Degnim, J. W. Jakub, C. M. Lohse, J. C. Boughey</b>                                                                                                                      | 2011 | Non-cutaneous metastasis (ie lymph node) |
| <b>N. Vassos, A. Agaimy, W. Hohenberger, R. S. Croner</b>                                                                                                                                                                                            | 2011 | Non-cutaneous metastasis (ie lymph node) |
| <b>A. Ueda, T. Matsumoto, Y. Komuro</b>                                                                                                                                                                                                              | 2011 | Non-cutaneous metastasis (ie lymph node) |
| <b>U. Marone, C. Caraco, A. M. Anniciello, G. Di Monta, M. G. Chiofalo, M. L. Di Cecilia, N. Mozzillo</b>                                                                                                                                            | 2011 | Non-cutaneous metastasis (ie lymph node) |
| <b>E. Carey, S. D. Jones, P. Griffiths, P. Baxter</b>                                                                                                                                                                                                | 2011 | Non-cutaneous metastasis (ie lymph node) |
| <b>M. Takada, H. Terunuma, X. Deng, M. Z. Dewan, S. Saji, K. Kuroi, N. Yamamoto, M. Toi</b>                                                                                                                                                          | 2011 | Non-cutaneous metastasis (ie lymph node) |
| <b>C. T. Liao, L. Y. Lee, S. F. Huang, I. H. Chen, C. J. Kang, C. Y. Lin, K. H. Fan, H. M. Wang, S. H. Ng, T. C. Yen</b>                                                                                                                             | 2011 | Non-cutaneous metastasis (ie lymph node) |
| <b>M. Sellinger, K. Neubauer, M. William, B. Hemmerlein, M. Friedrich, D. Salehin</b>                                                                                                                                                                | 2011 | Non-cutaneous metastasis (ie lymph node) |
| <b>C. Schneider, M. Schlaak, M. Bludau, B. Markiefka, M. C. Schmidt</b>                                                                                                                                                                              | 2012 | Non-cutaneous metastasis (ie lymph node) |
| <b>K. L. Hollowell, S. C. Agle, E. E. Zervos, T. L. Fitzgerald</b>                                                                                                                                                                                   | 2012 | Non-cutaneous metastasis (ie lymph node) |
| <b>F. Rongioletti, A. Pavesi, C. Carli, A. Parodi, R. Fiocca</b>                                                                                                                                                                                     | 2012 | Non-cutaneous metastasis (ie lymph node) |
| <b>T. C. Chua, R. A. Scolyer, C. W. Kennedy, T. D. Yan, B. C. McCaughan, J. F. Thompson</b>                                                                                                                                                          | 2012 | Non-cutaneous metastasis (ie lymph node) |
| <b>A. Farooki, V. Leung, H. Tala, R. M. Tuttle</b>                                                                                                                                                                                                   | 2012 | Non-cutaneous metastasis (ie lymph node) |
| <b>S. Du Four, S. Wilgenhof, J. Duerinck, A. Michotte, A. V. Binst, M. D. Ridder, B. Neyns</b>                                                                                                                                                       | 2012 | Non-cutaneous metastasis (ie lymph node) |
| <b>A. Siegmann, D. Bottke, J. Faehndrich, M. Brachert, G. Lohm, K. Miller, D. Bartkowiak, W. Hinkelbein, T. Wiegel</b>                                                                                                                               | 2012 | Non-cutaneous metastasis (ie lymph node) |
| <b>B. H. Burmeister, M. A. Henderson, J. Ainslie, R. Fisher, J. Iulio, B. M. Smithers, A. Hong, K. Shannon, R. A. Scolyer, S. Carruthers, B. J. Coventry, S. Babington, J. Duprat, H. J. Hoekstra, J. F. Thompson</b>                                | 2012 | Non-cutaneous metastasis (ie lymph node) |

|                                                                                                                                                                                                   |      |                                          |
|---------------------------------------------------------------------------------------------------------------------------------------------------------------------------------------------------|------|------------------------------------------|
| <b>E. Chow, L. Zeng, N. Salvo, K. Dennis, M. Tsao, S. Lutz</b>                                                                                                                                    | 2012 | Non-cutaneous metastasis (ie lymph node) |
| <b>Roberto Cirocchi, Stefano Trastulli, Carlo Boselli, Alessandro Montedori, Davide Cavaliere, Amilcare Parisi, Giuseppe Noya, Iosief Abraha</b>                                                  | 2012 | Non-cutaneous metastasis (ie lymph node) |
| <b>G. Patil Chirag, Katie Pricola, J. Manuel Sarmiento, K. Garg Sachin, Andrew Bryant, L. Black Keith</b>                                                                                         | 2012 | Non-cutaneous metastasis (ie lymph node) |
| <b>L. Reveiz, J.-R. Rueda, F. C. Andrés</b>                                                                                                                                                       | 2012 | Non-cutaneous metastasis (ie lymph node) |
| <b>M. N. Tsao, N. Lloyd, R. K. Wong, E. Chow, E. Rakovitch, N. Laperriere, W. Xu, A. Sahgal</b>                                                                                                   | 2012 | Non-cutaneous metastasis (ie lymph node) |
| <b>M. Yu, J. Chen, W. Dong, Q. Lv</b>                                                                                                                                                             | 2012 | Non-cutaneous metastasis (ie lymph node) |
| <b>R. Zukauskaitė, H. Schmidt, J. T. Asmussen, O. Hansen, L. Bastholt</b>                                                                                                                         | 2013 | Non-cutaneous metastasis (ie lymph node) |
| <b>M. O. Tarhan, L. Demir, I. Somali, S. Yigit, C. Erten, A. Alacacioglu, H. Ellidokuz, O. Seseogullari, Y. Kucukzeybek, A. Can, A. Dirican, V. Bayoglu, M. Akyol</b>                             | 2013 | Non-cutaneous metastasis (ie lymph node) |
| <b>A. Patel, N. D. G. Ratnavelu, P. L. Martin-Hirsch, R. Naik, A. Bryant, A. Ralte</b>                                                                                                            | 2013 | Non-cutaneous metastasis (ie lymph node) |
| <b>R. P. Riemsma, M. M. Bala, R. Wolff, J. Kleijnen</b>                                                                                                                                           | 2013 | Non-cutaneous metastasis (ie lymph node) |
| <b>Metastasi Cutanee da Carcinoma della Cervice: Descrizione di un Caso</b>                                                                                                                       | NA   | Non-English                              |
| <b>L. M. Cobb</b>                                                                                                                                                                                 | 1973 | Non-human (mouse model or in vitro)      |
| <b>W. H. Clark, Jr., B. H. Min, L. H. Kligman</b>                                                                                                                                                 | 1976 | Non-human (mouse model or in vitro)      |
| <b>L. H. Barr, R. L. Gartside, L. I. Goldman</b>                                                                                                                                                  | 1979 | Non-human (mouse model or in vitro)      |
| <b>J. B. Johnson, P. D. Noguchi, W. C. Browne, J. C. Petricciani</b>                                                                                                                              | 1981 | Non-human (mouse model or in vitro)      |
| <b>S. Naito, A. C. von Eschenbach, I. J. Fidler</b>                                                                                                                                               | 1987 | Non-human (mouse model or in vitro)      |
| <b>F. Momose, T. Araida, A. Negishi, H. Ichijo, S. Shioda, S. Sasaki</b>                                                                                                                          | 1989 | Non-human (mouse model or in vitro)      |
| <b>S. Subramasnian, A. H. Rodgers, L. R. Morgan, K. Soike, M. Ratteree</b>                                                                                                                        | 1996 | Non-human (mouse model or in vitro)      |
| <b>R. Ala-Aho, M. Ahonen, S. J. George, J. Heikkila, R. Grenman, M. Kallajoki, V. M. Kahari</b>                                                                                                   | 2004 | Non-human (mouse model or in vitro)      |
| <b>M. J. Kumar, K. S. Ponvijay, R. Nandhini, R. S. Nagarajan, J. Jose, G. Srinivas, P. Nagarajan, R. Venkatesan, K. Kumar, S. Singh</b>                                                           | 2007 | Non-human (mouse model or in vitro)      |
| <b>M. Nakamura, H. Suemizu</b>                                                                                                                                                                    | 2008 | Non-human (mouse model or in vitro)      |
| <b>H. Kubo, A. Ashida, K. Matsumoto, T. Kageshita, A. Yamamoto, T. Saida</b>                                                                                                                      | 2008 | Non-human (mouse model or in vitro)      |
| <b>T. Y. Lin, A. Hamberg, R. Pentecost, M. Wellman, P. Stromberg</b>                                                                                                                              | 2010 | Non-human (mouse model or in vitro)      |
| <b>C. Busch, T. Sinnberg, H. Niessner, E. Kohler, S. Venturelli, A. Berger, M. Schaller, A. Pflugfelder, P. Bareiss, B. Stork, J. Landsberg, C. Vollbracht, H. Breuninger, F. Meier, C. Garbe</b> | 2010 | Non-human (mouse model or in vitro)      |
| <b>D. L. Kirkpatrick, J. L. H. Johnson, R. Lemos, M. Abdelemelek, N. Ihle, G. Powis</b>                                                                                                           | 2011 | Non-human (mouse model or in vitro)      |
| <b>T. Sinnberg, H. Niessner, S. Venturelli, M. Schaller, P. Bareiss, B. Stork, J. Landsberg, T. Proikas-Czanne, T. Volz, K. Ikenberg, M. Levesque, P. Schuler, N. Murthy, C. Garbe, C. Busch</b>  | 2011 | Non-human (mouse model or in vitro)      |
| <b>R. Fan, C. Wang, Y. Wang, P. Ren, P. Gan, H. Ji, Z. Xia, S. Hu, Q. Zeng, W. Huang, Y. Jiang, X. Huang</b>                                                                                      | 2012 | Non-human (mouse model or in vitro)      |
| <b>A. L. Birgit, H. K. Iversen, J. M. Moller, P. Ibsen, K. S. Jensen, M. Linnert, J. Gehl</b>                                                                                                     | 2012 | Non-human (mouse model or in vitro)      |
| <b>Y. Y. Janjigian, C. M. Gromisch, G. Carbonetti, L. H. Tang, D. P. Kelsen, D. G. Coit, E. Vakiani, E. De Stanchina, V. E. Strong</b>                                                            | 2012 | Non-human (mouse model or in vitro)      |
| <b>E. P. Spugnini, M. Fanciulli, G. Citro, A. Baldi</b>                                                                                                                                           | 2012 | Non-human (mouse model or in vitro)      |
| <b>S. Noboru, K. Tomomi, Y. Toshinari, K. Toru, A. Ryuichiro, S. Hiromasa, I. Takahiro, O. Osamu</b>                                                                                              | 2012 | Non-human (mouse model or in vitro)      |
| <b>D. Ciolczyk-Wierzbicka, D. Gil, P. Laidler</b>                                                                                                                                                 | 2012 | Non-human (mouse model or in vitro)      |

|                                                                                                                                                         |      |                                                                                    |
|---------------------------------------------------------------------------------------------------------------------------------------------------------|------|------------------------------------------------------------------------------------|
| <b>G. Mosoyan, C. Nagi, S. Marukian, A. Teixeira, A. Simonian, L. Resnick-Silverman, A. DiFeo, D. Johnston, S. R. Reynolds, D. F. Roses, A. Mosoian</b> | 2013 | Non-human (mouse model or in vitro)                                                |
| <b>F. H. Rampen, E. P. van der Esch</b>                                                                                                                 | 1985 | Not an original article with unique patient data (i.e., review, or editorial, etc) |
| <b>S. Schultz, M. J. Mastrangelo</b>                                                                                                                    | 1989 | Not an original article with unique patient data (i.e., review, or editorial, etc) |
| <b>D. M. Albert, A. S. Niffenegger, J. K. V. Willson</b>                                                                                                | 1992 | Not an original article with unique patient data (i.e., review, or editorial, etc) |
| <b>K. Oberg</b>                                                                                                                                         | 1994 | Not an original article with unique patient data (i.e., review, or editorial, etc) |
| <b>M. Weil, G. Auclerc, O. Rixe, T. Petit, A. Benhammouda, C. Borel, D. Khayat</b>                                                                      | 1994 | Not an original article with unique patient data (i.e., review, or editorial, etc) |
| <b>R. Kamble, L. Kumar, V. Kochupillai, A. Sharma, M. S. Sandhoo, B. K. Mohanti</b>                                                                     | 1995 | Not an original article with unique patient data (i.e., review, or editorial, etc) |
| <b>H. J. Carson, P. Gattuso, M. J. Castelli, V. Reddy</b>                                                                                               | 1995 | Not an original article with unique patient data (i.e., review, or editorial, etc) |
| <b>M. G. E. O'Rourke, C. W. Schmidt, T. R. O'Rourke, K. A. O. Ellem</b>                                                                                 | 1997 | Not an original article with unique patient data (i.e., review, or editorial, etc) |
| <b>R. Bissonnette, H. Lui</b>                                                                                                                           | 1997 | Not an original article with unique patient data (i.e., review, or editorial, etc) |
| <b>J. S. McCaughan Jr</b>                                                                                                                               | 1999 | Not an original article with unique patient data (i.e., review, or editorial, etc) |
| <b>B. L. Van Leeuwen, M. Houwerzijl, H. J. Hoekstra</b>                                                                                                 | 2000 | Not an original article with unique patient data (i.e., review, or editorial, etc) |
| <b>K. Kalka, H. Merk, H. Mukhtar</b>                                                                                                                    | 2000 | Not an original article with unique patient data (i.e., review, or editorial, etc) |
| <b>B. B. Kroon, O. E. Nieweg</b>                                                                                                                        | 2000 | Not an original article with unique patient data (i.e., review, or editorial, etc) |
| <b>S. Karrer, R. M. Szeimies, U. Hohenleutner, M. Landthaler</b>                                                                                        | 2001 | Not an original article with unique patient data (i.e., review, or editorial, etc) |
| <b>S. Moore</b>                                                                                                                                         | 2002 | Not an original article with unique patient data (i.e., review, or editorial, etc) |
| <b>J. M. Leonhardt, W. R. Heymann</b>                                                                                                                   | 2002 | Not an original article with unique patient data (i.e., review, or editorial, etc) |
| <b>C. M. Balch, M. C. Mihm</b>                                                                                                                          | 2002 | Not an original article with unique patient data (i.e., review, or editorial, etc) |
| <b>A. V. Evans, F. J. Child, R. Russell-Jones</b>                                                                                                       | 2003 | Not an original article with unique patient data (i.e., review, or editorial, etc) |



---

|                                                                                                                                          |      |                                                                                            |
|------------------------------------------------------------------------------------------------------------------------------------------|------|--------------------------------------------------------------------------------------------|
| <b>D. Navi, A. Huntley</b>                                                                                                               | 2004 | etc)<br>Not an original article with unique patient data (i.e., review, or editorial, etc) |
| <b>C. A. Burns, M. D. Brown</b>                                                                                                          | 2005 | Not an original article with unique patient data (i.e., review, or editorial, etc)         |
| <b>A. L. Granite, S. A. Sukal</b>                                                                                                        | 2005 | Not an original article with unique patient data (i.e., review, or editorial, etc)         |
| <b>I. Gkialas, A. Kalantzis, M. Lykourinas</b>                                                                                           | 2005 | Not an original article with unique patient data (i.e., review, or editorial, etc)         |
| <b>R. Gabriele, M. Conte, F. Egidio, M. Borghese</b>                                                                                     | 2005 | Not an original article with unique patient data (i.e., review, or editorial, etc)         |
| <b>B. G. Taal, M. Smits</b>                                                                                                              | 2005 | Not an original article with unique patient data (i.e., review, or editorial, etc)         |
| <b>M. E. Falagas, P. I. Vergidis</b>                                                                                                     | 2005 | Not an original article with unique patient data (i.e., review, or editorial, etc)         |
| <b>M. Aghi, R. L. Martuza</b>                                                                                                            | 2005 | Not an original article with unique patient data (i.e., review, or editorial, etc)         |
| <b>C. Benvenuto-Andrade, A. Oseitutu, A. L. Agero, A. A. Marghoob</b>                                                                    | 2005 | Not an original article with unique patient data (i.e., review, or editorial, etc)         |
| <b>A. Green John, J. Kirwan John, Jayne Tierney, L. Vale Claire, R. Symonds Paul, L. Fresco Lydia, Chris Williams, Mandy Collingwood</b> | 2005 | Not an original article with unique patient data (i.e., review, or editorial, etc)         |
| <b>D. W. Ollila, A. S. Caudle</b>                                                                                                        | 2006 | Not an original article with unique patient data (i.e., review, or editorial, etc)         |
| <b>C. E. Kleyn, J. E. Lai-Cheong, H. K. Bell</b>                                                                                         | 2006 | Not an original article with unique patient data (i.e., review, or editorial, etc)         |
| <b>C. M. Byrne, J. F. Thompson</b>                                                                                                       | 2006 | Not an original article with unique patient data (i.e., review, or editorial, etc)         |
| <b>M. J. Molina Garrido, C. G. Ponce, J. L. Soto Martinez, C. M. y Sevilla, A. C. Mena, F. M. Anton</b>                                  | 2006 | Not an original article with unique patient data (i.e., review, or editorial, etc)         |
| <b>R. R. Allison, C. H. Sibata, G. H. Downie, R. E. Cuenca</b>                                                                           | 2006 | Not an original article with unique patient data (i.e., review, or editorial, etc)         |
| <b>D. Farray, J. I. Clark</b>                                                                                                            | 2006 | Not an original article with unique patient data (i.e., review, or editorial, etc)         |
| <b>M. Alam</b>                                                                                                                           | 2006 | Not an original article with unique patient data (i.e., review, or editorial, etc)         |
| <b>N. S. Scheinfeld</b>                                                                                                                  | 2006 | Not an original article with unique patient data (i.e., review, or editorial, etc)         |
| <b>M. Schon, M. P. Schon</b>                                                                                                             | 2007 | Not an original article with unique                                                        |

---

|                                                                                                                                                                                                                        |      |                                                                                    |
|------------------------------------------------------------------------------------------------------------------------------------------------------------------------------------------------------------------------|------|------------------------------------------------------------------------------------|
|                                                                                                                                                                                                                        |      | patient data (i.e., review, or editorial, etc)                                     |
| <b>M. Fernandez-Guarino, I. Garcia-Morales, A. Harto, C. Montull, B. Perez-Garcia, P. Jaen</b>                                                                                                                         | 2007 | Not an original article with unique patient data (i.e., review, or editorial, etc) |
| <b>C. Garbe, T. K. Eigentler</b>                                                                                                                                                                                       | 2007 | Not an original article with unique patient data (i.e., review, or editorial, etc) |
| <b>M. Rajer</b>                                                                                                                                                                                                        | 2007 | Not an original article with unique patient data (i.e., review, or editorial, etc) |
| <b>S. R. Vink, W. J. van Blitterswijk, J. H. M. Schellens, M. Verheij</b>                                                                                                                                              | 2007 | Not an original article with unique patient data (i.e., review, or editorial, etc) |
| <b>J. LoPiccolo, C. A. Granville, J. J. Gills, P. A. Dennis</b>                                                                                                                                                        | 2007 | Not an original article with unique patient data (i.e., review, or editorial, etc) |
| <b>E. Corgna, M. Betti, G. Gatta, F. Roila, P. H. M. De Mulder</b>                                                                                                                                                     | 2007 | Not an original article with unique patient data (i.e., review, or editorial, etc) |
| <b>C. K. Bichakjian, L. Lowe, C. D. Lao, H. M. Sandler, C. R. Bradford, T. M. Johnson, S. L. Wong</b>                                                                                                                  | 2007 | Not an original article with unique patient data (i.e., review, or editorial, etc) |
| <b>C. Favard, D. S. Dean, M. P. Rols</b>                                                                                                                                                                               | 2007 | Not an original article with unique patient data (i.e., review, or editorial, etc) |
| <b>A. A. Sarnaik, J. S. Zager, V. K. Sondak</b>                                                                                                                                                                        | 2007 | Not an original article with unique patient data (i.e., review, or editorial, etc) |
| <b>D. Sasse Andre, C. Sasse Emma, G. O. Clark Luciana, Luciana Ulloa, Camara Clark Otavio Augusto</b>                                                                                                                  | 2007 | Not an original article with unique patient data (i.e., review, or editorial, etc) |
| <b>T. Meyer, E. Stockfleth</b>                                                                                                                                                                                         | 2008 | Not an original article with unique patient data (i.e., review, or editorial, etc) |
| <b>Y. G. Qiang, C. M. N. Yow, Z. Huang</b>                                                                                                                                                                             | 2008 | Not an original article with unique patient data (i.e., review, or editorial, etc) |
| <b>C. Garbe, A. Hauschild, M. Volkenandt, D. Schadendorf, W. Stolz, U. Reinhold, R. D. Kortmann, C. Kettelhack, B. Frerich, U. Keilholz, R. Dummer, G. Sebastian, W. Tilgen, G. Schuler, A. MacKensen, R. Kaufmann</b> | 2008 | Not an original article with unique patient data (i.e., review, or editorial, etc) |
| <b>N. Novak, C. F. Yu, T. Bieber, J. P. Allam</b>                                                                                                                                                                      | 2008 | Not an original article with unique patient data (i.e., review, or editorial, etc) |
| <b>S. Chiacchio, A. Lorenzoni, G. Boni, D. Rubello, R. Elisei, G. Mariani</b>                                                                                                                                          | 2008 | Not an original article with unique patient data (i.e., review, or editorial, etc) |
| <b>R. R. Allison, C. H. Sibata</b>                                                                                                                                                                                     | 2008 | Not an original article with unique patient data (i.e., review, or editorial, etc) |
| <b>V. A. Trinh</b>                                                                                                                                                                                                     | 2008 | Not an original article with unique patient data (i.e., review, or editorial, etc) |
| <b>G. Hinds, V. D. Thomas</b>                                                                                                                                                                                          | 2008 | Not an original article with unique patient data (i.e., review, or editorial, etc) |

|                                                                                                                                                                                                                                                                                            |      |                                                                                            |
|--------------------------------------------------------------------------------------------------------------------------------------------------------------------------------------------------------------------------------------------------------------------------------------------|------|--------------------------------------------------------------------------------------------|
| <b>B. Zbytek, J. A. Carlson, J. Granese, J. Ross, M. Mihm Jr, A. Slominski</b>                                                                                                                                                                                                             | 2008 | etc)<br>Not an original article with unique patient data (i.e., review, or editorial, etc) |
| <b>G. Rolz-Cruz, C. C. Kim</b>                                                                                                                                                                                                                                                             | 2008 | Not an original article with unique patient data (i.e., review, or editorial, etc)         |
| <b>A. M. Finner, N. Otberg, J. Shapiro</b>                                                                                                                                                                                                                                                 | 2008 | Not an original article with unique patient data (i.e., review, or editorial, etc)         |
| <b>C. Thirlwell, P. Nathan</b>                                                                                                                                                                                                                                                             | 2008 | Not an original article with unique patient data (i.e., review, or editorial, etc)         |
| <b>M. F. Demierre, M. S. Sabel, K. A. Margolin, A. I. Daud, V. K. Sondak</b>                                                                                                                                                                                                               | 2008 | Not an original article with unique patient data (i.e., review, or editorial, etc)         |
| <b>Chris Coppin, Lyly Le, J. Wilt Timothy, Christian Kollmannsberger</b>                                                                                                                                                                                                                   | 2008 | Not an original article with unique patient data (i.e., review, or editorial, etc)         |
| <b>Markus Horneber, Gerd Bueschel, Roman Huber, Klaus Linde, Matthias Rostock</b>                                                                                                                                                                                                          | 2008 | Not an original article with unique patient data (i.e., review, or editorial, etc)         |
| <b>Peng Lihua, Y. Chen Xiao, Taixiang Wu</b>                                                                                                                                                                                                                                               | 2008 | Not an original article with unique patient data (i.e., review, or editorial, etc)         |
| <b>M. W. McDonald, K. D. Godette, E. K. Butker, L. W. Davis, P. A. Johnstone</b>                                                                                                                                                                                                           | 2008 | Not an original article with unique patient data (i.e., review, or editorial, etc)         |
| <b>D. Nashan, M. L. Muller, M. Braun-Falco, S. Reichenberger, R. M. Szeimies, L. Bruckner-Tuderman</b>                                                                                                                                                                                     | 2009 | Not an original article with unique patient data (i.e., review, or editorial, etc)         |
| <b>T. W. Mollet, C. A. Garcia, G. Koester</b>                                                                                                                                                                                                                                              | 2009 | Not an original article with unique patient data (i.e., review, or editorial, etc)         |
| <b>G. E. Pierard, C. Pierard-Franchimont, P. Paquet, P. Quatresooz</b>                                                                                                                                                                                                                     | 2009 | Not an original article with unique patient data (i.e., review, or editorial, etc)         |
| <b>R. Ubriani, M. E. Grossman</b>                                                                                                                                                                                                                                                          | 2009 | Not an original article with unique patient data (i.e., review, or editorial, etc)         |
| <b>N. H. Cox</b>                                                                                                                                                                                                                                                                           | 2009 | Not an original article with unique patient data (i.e., review, or editorial, etc)         |
| <b>G. Tosti, A. Di Pietro, P. F. Ferrucci, A. Testori</b>                                                                                                                                                                                                                                  | 2009 | Not an original article with unique patient data (i.e., review, or editorial, etc)         |
| <b>G. A. Patel, R. A. Schwartz</b>                                                                                                                                                                                                                                                         | 2009 | Not an original article with unique patient data (i.e., review, or editorial, etc)         |
| <b>S. N. Markovic, L. A. Erickson, T. J. Flotte, L. A. Kottschade, R. R. McWilliams, J. W. Jakub, D. R. Farley, N. V. Tran, S. E. Schild, K. R. Olivier, S. Vuk-Pavlovic, A. Sekulic, R. H. Weenig, J. S. Pulido, J. F. Quevedo, R. G. Vile, G. A. Wiseman, I. Stoian, M. R. Pittelkow</b> | 2009 | Not an original article with unique patient data (i.e., review, or editorial, etc)         |
| <b>K. V. R. N. S. Ramesh, K. Ravi Shankar</b>                                                                                                                                                                                                                                              | 2009 | Not an original article with unique patient data (i.e., review, or editorial, etc)         |

|                                                                                                                                                                                                                                                                                                 |      |                                                                                    |
|-------------------------------------------------------------------------------------------------------------------------------------------------------------------------------------------------------------------------------------------------------------------------------------------------|------|------------------------------------------------------------------------------------|
| <b>R. A. Clark, R. C. Fuhlbrigge</b>                                                                                                                                                                                                                                                            | 2009 | Not an original article with unique patient data (i.e., review, or editorial, etc) |
| <b>R. Kobashi-Katoh, M. Tanioka, K. Takahashi, Y. Miyachi</b>                                                                                                                                                                                                                                   | 2009 | Not an original article with unique patient data (i.e., review, or editorial, etc) |
| <b>V. Petry, A. A. Gaspari</b>                                                                                                                                                                                                                                                                  | 2009 | Not an original article with unique patient data (i.e., review, or editorial, etc) |
| <b>R. R. Allison, C. H. Sibata</b>                                                                                                                                                                                                                                                              | 2010 | Not an original article with unique patient data (i.e., review, or editorial, etc) |
| <b>A. Testori, G. Tosti, C. Martinoli, G. Spadola, F. Cataldo, F. Verrecchia, F. Baldini, M. Mosconi, J. Soteldo, I. Tedeschi, C. Passoni, C. Pari, A. Di Pietro, P. F. Ferrucci</b>                                                                                                            | 2010 | Not an original article with unique patient data (i.e., review, or editorial, etc) |
| <b>R. R. Allison, C. H. Sibata</b>                                                                                                                                                                                                                                                              | 2010 | Not an original article with unique patient data (i.e., review, or editorial, etc) |
| <b>D. Nashan, F. Meiss, M. Braun-Falco, S. Reichenberger</b>                                                                                                                                                                                                                                    | 2010 | Not an original article with unique patient data (i.e., review, or editorial, etc) |
| <b>M. R. Hussein</b>                                                                                                                                                                                                                                                                            | 2010 | Not an original article with unique patient data (i.e., review, or editorial, etc) |
| <b>C. Garbe, K. Peris, A. Hauschild, P. Saiag, M. Middleton, A. Spatz, J. J. Grob, J. Malvehy, J. Newton-Bishop, A. Stratigos, H. Pehamberger, A. Eggermont</b>                                                                                                                                 | 2010 | Not an original article with unique patient data (i.e., review, or editorial, etc) |
| <b>Z. A. Abdel-Malek</b>                                                                                                                                                                                                                                                                        | 2010 | Not an original article with unique patient data (i.e., review, or editorial, etc) |
| <b>Z. Ji, K. T. Flaherty, H. Tsao</b>                                                                                                                                                                                                                                                           | 2010 | Not an original article with unique patient data (i.e., review, or editorial, etc) |
| <b>W. Valins, S. Amini, B. Berman</b>                                                                                                                                                                                                                                                           | 2010 | Not an original article with unique patient data (i.e., review, or editorial, etc) |
| <b>R. M. R. Hearn, C. J. Fleming</b>                                                                                                                                                                                                                                                            | 2010 | Not an original article with unique patient data (i.e., review, or editorial, etc) |
| <b>Anne-Marie Glenny, Susan Furness, V. Worthington Helen, I. Conway David, Richard Oliver, E. Clarkson Jan, Michaelina Macluskey, Sue Pavitt, K. W. Chan Kelvin, Paul Brocklehurst, Csroc Expert Panel The Chao Ma, Jiawei Xie, Wanxia Liu, Guoming Wang, Shuyao Zuo, Xufu Wang, Fengyu Wu</b> | 2010 | Not an original article with unique patient data (i.e., review, or editorial, etc) |
| <b>U. Reinhold</b>                                                                                                                                                                                                                                                                              | 2011 | Not an original article with unique patient data (i.e., review, or editorial, etc) |
| <b>P. L. Triozzi, R. J. Tuthill, E. Borden</b>                                                                                                                                                                                                                                                  | 2011 | Not an original article with unique patient data (i.e., review, or editorial, etc) |
| <b>D. W. Ollila, A. L. Gleisner, E. C. Hsueh</b>                                                                                                                                                                                                                                                | 2011 | Not an original article with unique patient data (i.e., review, or editorial, etc) |
| <b>K. Blecher, A. Friedman</b>                                                                                                                                                                                                                                                                  | 2011 | Not an original article with unique patient data (i.e., review, or editorial, etc) |

|                                                                                                                                                                                 |      |                                                                                            |
|---------------------------------------------------------------------------------------------------------------------------------------------------------------------------------|------|--------------------------------------------------------------------------------------------|
| <b>K. Blecher, A. Friedman</b>                                                                                                                                                  | 2011 | etc)<br>Not an original article with unique patient data (i.e., review, or editorial, etc) |
| <b>B. Kalmykow, S. Walker</b>                                                                                                                                                   | 2011 | Not an original article with unique patient data (i.e., review, or editorial, etc)         |
| <b>M. P. Hoang</b>                                                                                                                                                              | 2011 | Not an original article with unique patient data (i.e., review, or editorial, etc)         |
| <b>A. S. Caudle, M. I. Ross</b>                                                                                                                                                 | 2011 | Not an original article with unique patient data (i.e., review, or editorial, etc)         |
| <b>C. R. McHenry, R. Phitayakorn</b>                                                                                                                                            | 2011 | Not an original article with unique patient data (i.e., review, or editorial, etc)         |
| <b>D. C. Gaston, R. J. Whitley, J. N. Parker</b>                                                                                                                                | 2011 | Not an original article with unique patient data (i.e., review, or editorial, etc)         |
| <b>K. Kamposioras, G. Pentheroudakis, D. Pectasides, N. Pavlidis</b>                                                                                                            | 2011 | Not an original article with unique patient data (i.e., review, or editorial, etc)         |
| <b>H. J. Emanuel, P. Emanuel, A. J. Kleinberger, E. M. Genden</b>                                                                                                               | 2011 | Not an original article with unique patient data (i.e., review, or editorial, etc)         |
| <b>A. Rebora</b>                                                                                                                                                                | 2011 | Not an original article with unique patient data (i.e., review, or editorial, etc)         |
| <b>N. Neuhold</b>                                                                                                                                                               | 2011 | Not an original article with unique patient data (i.e., review, or editorial, etc)         |
| <b>Alyson Bessell, Anne-Marie Glenny, Susan Furness, E. Clarkson Jan, Richard Oliver, I. Conway David, Michaelina Macluskey, Sue Pavitt, Philip Sloan, V. Worthington Helen</b> | 2011 | Not an original article with unique patient data (i.e., review, or editorial, etc)         |
| <b>C. Garbe, K. Peris, A. Hauschild, P. Saiag, M. Middleton, A. Spatz, J. J. Grob, J. Malvehy, J. Newton-Bishop, A. Stratigos, H. Pehamberger, A. M. Eggermont</b>              | 2012 | Not an original article with unique patient data (i.e., review, or editorial, etc)         |
| <b>K. B. Reed, R. H. Cook-Norris, J. D. Brewer</b>                                                                                                                              | 2012 | Not an original article with unique patient data (i.e., review, or editorial, etc)         |
| <b>A. Testori, C. R. Rossi, G. Tosti</b>                                                                                                                                        | 2012 | Not an original article with unique patient data (i.e., review, or editorial, etc)         |
| <b>C. A. Barker, N. Y. Lee</b>                                                                                                                                                  | 2012 | Not an original article with unique patient data (i.e., review, or editorial, etc)         |
| <b>L. S. Dias, G. Vivek, A. C. K. Rao, R. Acharya</b>                                                                                                                           | 2012 | Not an original article with unique patient data (i.e., review, or editorial, etc)         |
| <b>A. Testori, A. Intelisano, F. Verrecchia, C. Menicanti, G. Tosti, E. Grassi, C. Pari, E. Pennacchioli</b>                                                                    | 2012 | Not an original article with unique patient data (i.e., review, or editorial, etc)         |
| <b>K. G. Bergstrom</b>                                                                                                                                                          | 2012 | Not an original article with unique patient data (i.e., review, or editorial, etc)         |
| <b>M. Haigentz Jr, D. M. Hartl, C. E. Silver, J. A. Langendijk, P. Strojjan,</b>                                                                                                | 2012 | Not an original article with unique                                                        |

|                                                                                                                                                      |      |                                                                                                                                      |
|------------------------------------------------------------------------------------------------------------------------------------------------------|------|--------------------------------------------------------------------------------------------------------------------------------------|
| <b>V. Paleri, R. De Bree, J. P. MacHiels, M. Hamoir, A. Rinaldo, D. Paccagnella, A. R. Shaha, R. P. Takes, A. Ferlito S. L. Geere, A. P. Barbour</b> | 2012 | patient data (i.e., review, or editorial, etc)<br>Not an original article with unique patient data (i.e., review, or editorial, etc) |
| <b>S. M. Levine, R. L. Shapiro</b>                                                                                                                   | 2012 | Not an original article with unique patient data (i.e., review, or editorial, etc)                                                   |
| <b>A. Hallett, H. Traunecker</b>                                                                                                                     | 2012 | Not an original article with unique patient data (i.e., review, or editorial, etc)                                                   |
| <b>M. Zeyaulah, M. Patro, I. Ahmad, K. Ibraheem, P. Sultan, M. Nehal, A. Ali</b>                                                                     | 2012 | Not an original article with unique patient data (i.e., review, or editorial, etc)                                                   |
| <b>S. Basith, B. Manavalan, T. H. Yoo, S. G. Kim, S. Choi</b>                                                                                        | 2012 | Not an original article with unique patient data (i.e., review, or editorial, etc)                                                   |
| <b>B. Howitt, A. F. Nascimento</b>                                                                                                                   | 2012 | Not an original article with unique patient data (i.e., review, or editorial, etc)                                                   |
| <b>G. Wong, J. R. Chapman, J. C. Craig</b>                                                                                                           | 2012 | Not an original article with unique patient data (i.e., review, or editorial, etc)                                                   |
| <b>S. A. H. J. De Visscher, P. U. Dijkstra, I. B. Tan, J. L. N. Roodenburg, M. J. H. Witjes</b>                                                      | 2013 | Not an original article with unique patient data (i.e., review, or editorial, etc)                                                   |
| <b>P. Kumar, N. B. Bolshette, V. S. Jamdade, N. A. Mundhe, K. K. Thakur, K. K. Saikia, M. Lahkar</b>                                                 | 2013 | Not an original article with unique patient data (i.e., review, or editorial, etc)                                                   |
| <b>K. R. Shah, C. R. Boland, M. Patel, B. Thrash, A. Menter</b>                                                                                      | 2013 | Not an original article with unique patient data (i.e., review, or editorial, etc)                                                   |
| <b>B. S. Hoyt, P. R. Cohen</b>                                                                                                                       | 2013 | Not an original article with unique patient data (i.e., review, or editorial, etc)                                                   |
| <b>A. Kalbasi, C. H. June, N. Haas, N. Vapiwala</b>                                                                                                  | 2013 | Not an original article with unique patient data (i.e., review, or editorial, etc)                                                   |
| <b>K. Cogshall, T. Farsani, B. Ruben, T. H. McCalmont, T. G. Berger, L. P. Fox, K. Shinkai</b>                                                       | 2013 | Not an original article with unique patient data (i.e., review, or editorial, etc)                                                   |
| <b>M. Batus, S. Waheed, C. Ruby, L. Petersen, S. D. Bines, H. L. Kaufman</b>                                                                         | 2013 | Not an original article with unique patient data (i.e., review, or editorial, etc)                                                   |
| <b>K. A. Kovacs, B. Hegedus, I. Kenessey, J. Timar</b>                                                                                               | 2013 | Not an original article with unique patient data (i.e., review, or editorial, etc)                                                   |
| <b>E. A. Quigley, A. C. Halpern</b>                                                                                                                  | 2013 | Not an original article with unique patient data (i.e. Review, or editorial, etc.)                                                   |
| <b>J. A. Woolgar, A. Triantafyllou, A. Ferlito, K. O. Devaney, J. S. Lewis Jr, A. Rinaldo, P. J. Sloomweg, L. Barnes</b>                             | 2013 | Not an original article with unique patient data (i.e. Review, or editorial, etc.)                                                   |
| <b>S. Kaczanowska, A. M. Joseph, E. Davila</b>                                                                                                       | 2013 | Not an original article with unique patient data (i.e. Review, or editorial, etc.)                                                   |

|                                                                                                                                                                                               |      |                                                                                    |
|-----------------------------------------------------------------------------------------------------------------------------------------------------------------------------------------------|------|------------------------------------------------------------------------------------|
| <b>Thuria Al Rawahi, D. Lopes Alberto, E. Bristow Robert, Andrew Bryant, Ahmed Elattar, Supratik Chattopadhyay, Khadra Galaal</b>                                                             | 2013 | Not an original article with unique patient data (i.e. Review, or editorial, etc.) |
| <b>O. Lawal Aramide, Alfred Musekiwa, Liesl Grobler</b>                                                                                                                                       | 2013 | Not an original article with unique patient data (i.e. Review, or editorial, etc.) |
| <b>Simone Mocellin, B. Lens Marko, Sandro Pasquali, Pierluigi Pilati, Vanna Chiarion Sileni</b>                                                                                               | 2013 | Not an original article with unique patient data (i.e. Review, or editorial, etc.) |
| <b>U. K. Garg, V. K. Srivastava, V. S. Rajvanshi, B. B. Maheshwari</b>                                                                                                                        | 1973 | Primary tumor (not cutaneous metastasis)                                           |
| <b>P. G. Kuehn, R. Tennant, A. R. Brenneman</b>                                                                                                                                               | 1973 | Primary tumor (not cutaneous metastasis)                                           |
| <b>K. Welvaart, M. K. Polano</b>                                                                                                                                                              | 1973 | Primary tumor (not cutaneous metastasis)                                           |
| <b>M. S. Didolkar, R. E. Gerner, G. E. Moore</b>                                                                                                                                              | 1974 | Primary tumor (not cutaneous metastasis)                                           |
| <b>T. D. Bates</b>                                                                                                                                                                            | 1975 | Primary tumor (not cutaneous metastasis)                                           |
| <b>J. D. Everall, C. J. O'Doherty, J. Wand, P. M. Dowd</b>                                                                                                                                    | 1975 | Primary tumor (not cutaneous metastasis)                                           |
| <b>J. Rosai, H. W. Sumner, M. Kostianovsky, C. Perez-Mesa</b>                                                                                                                                 | 1976 | Primary tumor (not cutaneous metastasis)                                           |
| <b>E. Shanon, Y. Samuel, A. Adler, Y. Rapoport, C. Redianu</b>                                                                                                                                | 1976 | Primary tumor (not cutaneous metastasis)                                           |
| <b>W. K. Amery</b>                                                                                                                                                                            | 1976 | Primary tumor (not cutaneous metastasis)                                           |
| <b>A. F. Rojas, J. N. Feierstein, E. Mickiewicz, H. Glait, A. J. Olivari</b>                                                                                                                  | 1976 | Primary tumor (not cutaneous metastasis)                                           |
| <b>T. H. Stewart, A. C. Hollinshead, J. E. Harris, R. Belanger, A. Crepeau, G. D. Hooper, H. J. Sachs, D. J. Klaassen, W. Hirte, E. Rapp, A. F. Crook, M. Orizaga, D. P. Sengar, S. Raman</b> | 1976 | Primary tumor (not cutaneous metastasis)                                           |
| <b>E. Robinson, A. Bartal, Y. Cohen, R. Haasz, T. Mekori</b>                                                                                                                                  | 1977 | Primary tumor (not cutaneous metastasis)                                           |
| <b>J. Tonak, P. Hermanek, H. Groitl</b>                                                                                                                                                       | 1978 | Primary tumor (not cutaneous metastasis)                                           |
| <b>R. V. Pereiras, Jr., O. J. Rheingold, D. Huston, J. Mejia, M. Viamonte, R. O. Chiprut, E. R. Schiff</b>                                                                                    | 1978 | Primary tumor (not cutaneous metastasis)                                           |
| <b>W. C. Wood, A. B. Cosimi, R. W. Carey, S. D. Kaufman</b>                                                                                                                                   | 1978 | Primary tumor (not cutaneous metastasis)                                           |
| <b>C. G. Quillen</b>                                                                                                                                                                          | 1979 | Primary tumor (not cutaneous metastasis)                                           |
| <b>C. P. Karakousis, M. S. Didolkar, R. Lopez, R. Baffi, R. Moore, E. D. Holyoke</b>                                                                                                          | 1979 | Primary tumor (not cutaneous metastasis)                                           |
| <b>H. L. Evans, J. L. Smith</b>                                                                                                                                                               | 1980 | Primary tumor (not cutaneous metastasis)                                           |
| <b>C. L. Silverman, D. S. Strayer, T. H. Wasserman</b>                                                                                                                                        | 1982 | Primary tumor (not cutaneous metastasis)                                           |
| <b>T. F. Warner, G. R. Hafez, D. A. Buchler</b>                                                                                                                                               | 1982 | Primary tumor (not cutaneous metastasis)                                           |
| <b>F. E. Burkett, P. H. Jernstrom</b>                                                                                                                                                         | 1982 | Primary tumor (not cutaneous metastasis)                                           |
| <b>C. M. Balch, R. V. Smalley, A. A. Bartolucci, D. Burns, C. A. Presant, J. R. Durant</b>                                                                                                    | 1982 | Primary tumor (not cutaneous metastasis)                                           |
| <b>N. Javadpour, R. F. Ozols, T. Anderson</b>                                                                                                                                                 | 1982 | Primary tumor (not cutaneous metastasis)                                           |

|                                                                                                                                                                    |      |                                          |
|--------------------------------------------------------------------------------------------------------------------------------------------------------------------|------|------------------------------------------|
| <b>H. J. Senn, R. Amgwerd, W. F. Jungi, R. Hochuli, J. Ammann, G. Engelhart, C. Heinz, A. Wick, F. Enderlin, G. Creux, B. Simon, R. Lanz, R. Bigler, S. Seiler</b> | 1982 | Primary tumor (not cutaneous metastasis) |
| <b>G. Arcangeli, C. Nervi, R. Righini, G. Creton, M. A. Mirri, A. Guerra</b>                                                                                       | 1983 | Primary tumor (not cutaneous metastasis) |
| <b>R. M. Bukowski, S. Deodhar, J. S. Hewlett, R. Greenstreet</b>                                                                                                   | 1983 | Primary tumor (not cutaneous metastasis) |
| <b>L. H. Barr, L. I. Goldman, J. A. Solomon, D. I. Sanusi, R. J. Reed</b>                                                                                          | 1984 | Primary tumor (not cutaneous metastasis) |
| <b>P. Grohn, E. Heinonen, P. Klefstrom, J. Tarkkanen</b>                                                                                                           | 1984 | Primary tumor (not cutaneous metastasis) |
| <b>G. J. Slotman, T. Mohit, S. Raina, A. P. Swaminathan, M. Ohanian, B. F. Rush</b>                                                                                | 1984 | Primary tumor (not cutaneous metastasis) |
| <b>H. Maier, C. Schmoeckel, G. Burg, O. Braun-Falco</b>                                                                                                            | 1985 | Primary tumor (not cutaneous metastasis) |
| <b>H. I. Friedman, P. H. Cooper, H. J. Wanebo</b>                                                                                                                  | 1985 | Primary tumor (not cutaneous metastasis) |
| <b>J. B. Weissberg, Y. H. Son, R. J. Papac</b>                                                                                                                     | 1985 | Primary tumor (not cutaneous metastasis) |
| <b>L. M. Dzubow, D. J. Grossman, B. Johnson</b>                                                                                                                    | 1986 | Primary tumor (not cutaneous metastasis) |
| <b>S. Suster, M. Ronnen, E. Lin, M. Shewach-Millet</b>                                                                                                             | 1986 | Primary tumor (not cutaneous metastasis) |
| <b>B. Ilie</b>                                                                                                                                                     | 1986 | Primary tumor (not cutaneous metastasis) |
| <b>R. T. Hoppe, E. A. Abel, D. G. Deneau, N. M. Price</b>                                                                                                          | 1987 | Primary tumor (not cutaneous metastasis) |
| <b>E. L. Kramer, J. J. Sanger, F. Golomb, A. W. Kopf, A. Postel</b>                                                                                                | 1987 | Primary tumor (not cutaneous metastasis) |
| <b>O. Berlin, L. Angervall, L. G. Kindblom</b>                                                                                                                     | 1987 | Primary tumor (not cutaneous metastasis) |
| <b>B. Egbert, R. Kempson, R. Sagebiel</b>                                                                                                                          | 1988 | Primary tumor (not cutaneous metastasis) |
| <b>H. S. Matloub, M. W. Cunningham, N. J. Yousif, J. R. Sanger, J. A. Romano, H. Y. Choi</b>                                                                       | 1988 | Primary tumor (not cutaneous metastasis) |
| <b>C. L. Slingluff Jr, R. T. Vollmer, D. S. Reintgen, H. F. Seigler</b>                                                                                            | 1988 | Primary tumor (not cutaneous metastasis) |
| <b>F. J. Lejeune, E. Macher, U. Kleeberg, P. Rumke, M. Prade, D. Thomas, S. Suci</b>                                                                               | 1988 | Primary tumor (not cutaneous metastasis) |
| <b>D. N. Danforth, Jr., M. E. Lippman, H. McDonald, J. Bader, E. Egan, M. Lampert, S. M. Steinberg, S. M. Swain</b>                                                | 1990 | Primary tumor (not cutaneous metastasis) |
| <b>C. Dabski, H. M. Reiman, Jr., S. A. Muller</b>                                                                                                                  | 1990 | Primary tumor (not cutaneous metastasis) |
| <b>P. Wuisman, W. F. Enneking</b>                                                                                                                                  | 1990 | Primary tumor (not cutaneous metastasis) |
| <b>U. Veronesi, F. Volterrani, A. Luini, R. Saccozzi, M. Vecchio, R. Zucali, V. Galimberti, A. Rasponi, E. Re, P. Squicciarini</b>                                 | 1990 | Primary tumor (not cutaneous metastasis) |
| <b>H. J. Elsmann, K. Ernst, L. Suter</b>                                                                                                                           | 1991 | Primary tumor (not cutaneous metastasis) |
| <b>R. L. Moy, J. E. Rivkin, H. Lee, W. S. Brooks, J. A. Zitelli</b>                                                                                                | 1991 | Primary tumor (not cutaneous metastasis) |
| <b>U. Veronesi, N. Cascinelli</b>                                                                                                                                  | 1991 | Primary tumor (not cutaneous metastasis) |
| <b>G. T. Nahass, A. Blauvelt, C. L. Leonardi, N. S. Penneys</b>                                                                                                    | 1992 | Primary tumor (not cutaneous metastasis) |



|                                                                                                                                                                                                                                              |      |                                          |
|----------------------------------------------------------------------------------------------------------------------------------------------------------------------------------------------------------------------------------------------|------|------------------------------------------|
|                                                                                                                                                                                                                                              |      | metastasis)                              |
| S. N. Snow, G. T. Reizner                                                                                                                                                                                                                    | 1992 | Primary tumor (not cutaneous metastasis) |
| H. K. Awwad, Y. Khafagy, M. Barsoum, S. Ezzat, I. el-Attar, H. Farag, H. Akoush, H. Meabid, M. S. Zaghoul                                                                                                                                    | 1992 | Primary tumor (not cutaneous metastasis) |
| F. B. Stehman, B. N. Bundy, G. Thomas, M. Varia, T. Okagaki, J. Roberts, J. Bell, P. B. Heller                                                                                                                                               | 1992 | Primary tumor (not cutaneous metastasis) |
| M. S. Zaghoul, H. K. Awwad, H. H. Akoush, S. Omar, O. Soliman, I. Attar                                                                                                                                                                      | 1992 | Primary tumor (not cutaneous metastasis) |
| R. Martino, A. Sureda, D. Sitjas, J. Nomdedeu, A. Domingo-Albos                                                                                                                                                                              | 1993 | Primary tumor (not cutaneous metastasis) |
| M. Yoshimoto, G. Sakamoto, Y. Ohashi                                                                                                                                                                                                         | 1993 | Primary tumor (not cutaneous metastasis) |
| M. P. Hopkins, G. C. Reid, G. W. Morley                                                                                                                                                                                                      | 1993 | Primary tumor (not cutaneous metastasis) |
| C. M. Balch, M. M. Urist, C. P. Karakousis, T. J. Smith, W. J. Temple, K. Drzewiecki, W. R. Jewell, A. A. Bartolucci, M. C. Mihm, R. Barnhill                                                                                                | 1993 | Primary tumor (not cutaneous metastasis) |
| F. Kikkawa, M. Kawai, H. Oguchi, M. Kojima, H. Ishikawa, M. Iwata, O. Maeda, Y. Tomoda, Y. Arii, K. Kuzuya                                                                                                                                   | 1993 | Primary tumor (not cutaneous metastasis) |
| T. Y. Wong, S. Suster, T. Nogita, L. M. Duncan, R. G. Dickersin, M. C. Mihm, Jr.                                                                                                                                                             | 1994 | Primary tumor (not cutaneous metastasis) |
| O. Bairey, I. Kremer, E. Rakowsky, H. Hadar, M. Shaklai                                                                                                                                                                                      | 1994 | Primary tumor (not cutaneous metastasis) |
| B. R. Smoller, R. Marcus                                                                                                                                                                                                                     | 1994 | Primary tumor (not cutaneous metastasis) |
| M. T. Glover, N. Niranjana, J. T. C. Kwan, I. M. Leigh                                                                                                                                                                                       | 1994 | Primary tumor (not cutaneous metastasis) |
| A. F. Olieman, H. Schraffordt Koops, J. H. Geertzen, H. Kingma, H. J. Hoekstra, J. Oldhoff                                                                                                                                                   | 1994 | Primary tumor (not cutaneous metastasis) |
| Y. Minagawa, J. Kigawa, N. Terakawa, K. Matsui                                                                                                                                                                                               | 1995 | Primary tumor (not cutaneous metastasis) |
| N. Basseres, J. J. Grob, M. A. Richard, X. Thirion, H. Zarour, C. Noe, A. M. Collet-Vilette, I. Lota, J. J. Bonerandi                                                                                                                        | 1995 | Primary tumor (not cutaneous metastasis) |
| J. A. Meeuwissen, R. G. Bourne, J. H. Kearsley                                                                                                                                                                                               | 1995 | Primary tumor (not cutaneous metastasis) |
| F. Aloï, A. Pich, M. Pippione                                                                                                                                                                                                                | 1996 | Primary tumor (not cutaneous metastasis) |
| U. Ringborg, R. Andersson, J. Eldh, B. Glaumann, L. Hafstrom, S. Jacobsson, P. E. Jonsson, H. Johansson, L. Krysanter, B. Lagerlof                                                                                                           | 1996 | Primary tumor (not cutaneous metastasis) |
| E. Bretschko, R. M. Szeimies, M. Landthaler, G. Lee                                                                                                                                                                                          | 1996 | Primary tumor (not cutaneous metastasis) |
| N. Sepp, K. Weyrer, M. Haun, B. Zelger, J. Thaler, V. Faber, P. Fritsch, K. Grunewald                                                                                                                                                        | 1996 | Primary tumor (not cutaneous metastasis) |
| E. Cvitkovic, F. Eschwege, M. Rahal, Dosen, Z. Mersic, Z. Krajina, J. P. Armand, J. Bouhris, M. M. Tubiana, G. Fountzilas, P. A. Kosmidis, U. Prasad, S. Ganesan, G. B. El, M. Bachouchi, A. Mansouri, J. Oliveira, J. Raposo, R. Wierzbicki | 1996 | Primary tumor (not cutaneous metastasis) |
| C. P. Karakousis, C. M. Balch, M. M. Urist, M. M. Ross, T. J. Smith, A. A. Bartolucci                                                                                                                                                        | 1996 | Primary tumor (not cutaneous metastasis) |
| E. Wall, C. C. Schaake-Koning, N. Zandwijk, J. W. Baars, J. H. Schornagel, D. J. Richel, E. J. Rutgers, J. H. Borger, J. H. Beijnen, S. Rodenhuis                                                                                            | 1996 | Primary tumor (not cutaneous metastasis) |
| S. N. Dommann, C. C. Dommann-Scherrer, T. Ziegler, J. Meyer, R. M. Trueb, T. Kundig, R. Panizzon, G. Burg                                                                                                                                    | 1997 | Primary tumor (not cutaneous metastasis) |
| M. J. Haws, M. W. Neumeister, D. G. Kenneaster, R. C. Russell                                                                                                                                                                                | 1997 | Primary tumor (not cutaneous metastasis) |

|                                                                                                                                                                                                   |      |                                          |
|---------------------------------------------------------------------------------------------------------------------------------------------------------------------------------------------------|------|------------------------------------------|
| <b>C. Berns, P. Fritz, F. W. Hensley, M. Wannemacher</b>                                                                                                                                          | 1997 | Primary tumor (not cutaneous metastasis) |
| <b>S. Dische, M. Saunders, A. Barrett, A. Harvey, D. Gibson, M. Parmar</b>                                                                                                                        | 1997 | Primary tumor (not cutaneous metastasis) |
| <b>K. Jingu, J. Ohmagari, K. Masuda, K. Morita, K. Sakamoto, H. Niibe, T. Ishigaki, T. Takashima, T. Inoue, N. Nakao, K. Ito, N. Matsunaga, S. Yoshida, N. Hayabuchi, M. Nakajo, T. Yoshimura</b> | 1997 | Primary tumor (not cutaneous metastasis) |
| <b>P. J. Anderson, J. A. Zuk, G. S. Rao, R. B. Berry</b>                                                                                                                                          | 1998 | Primary tumor (not cutaneous metastasis) |
| <b>O. Schofield, D. Kist, A. Lucas, E. Wayner, W. Carter, C. Zachary</b>                                                                                                                          | 1998 | Primary tumor (not cutaneous metastasis) |
| <b>R. Marianowski, M. Wassef, L. Amanou, P. Herman, P. Tran-Ba-Huy</b>                                                                                                                            | 1998 | Primary tumor (not cutaneous metastasis) |
| <b>M. Peiper, D. Zurakowski, R. Schwarz, H. J. Weh, C. Zornig</b>                                                                                                                                 | 1998 | Primary tumor (not cutaneous metastasis) |
| <b>S. A. Slavin, S. J. Schnitt, R. B. Duda, M. J. Houlihan, C. N. Koufman, D. J. Morris, S. L. Troyan, R. M. Goldwyn</b>                                                                          | 1998 | Primary tumor (not cutaneous metastasis) |
| <b>J. J. Grob, B. Dreno, P. Salmonière, M. Delaunay, D. Cupissol, B. Guillot, P. Souteyrand, B. Sassolas, J. P. Cesarini, S. Lionnet, C. Lok, C. Chastang, J. J. Bonerandi</b>                    | 1998 | Primary tumor (not cutaneous metastasis) |
| <b>A. Masotti, G. Morandini, R. Ortolani, L. Fumagalli</b>                                                                                                                                        | 1998 | Primary tumor (not cutaneous metastasis) |
| <b>H. Pehamberger, H. P. Soyer, A. Steiner, R. Kofler, M. Binder, P. Mischer, W. Pachinger, J. Auböck, P. Fritsch, H. Kerl, K. Wolff</b>                                                          | 1998 | Primary tumor (not cutaneous metastasis) |
| <b>S. M. Konstantinov, M. R. Berger</b>                                                                                                                                                           | 1999 | Primary tumor (not cutaneous metastasis) |
| <b>A. L. Giacomini, R. Di Pietro, P. Steindler</b>                                                                                                                                                | 1999 | Primary tumor (not cutaneous metastasis) |
| <b>D. M. Chinn, S. Chow, Y. H. Kim, R. T. Hoppe</b>                                                                                                                                               | 1999 | Primary tumor (not cutaneous metastasis) |
| <b>C. Ansink Anca, Marjan Stegeman, Jacobus van der Velden, Mandy Collingwood</b>                                                                                                                 | 1999 | Primary tumor (not cutaneous metastasis) |
| <b>L. Busutti, A. B. Blotta, G. Calò-Gabrieli, L. dell'Erba</b>                                                                                                                                   | 1999 | Primary tumor (not cutaneous metastasis) |
| <b>W. H. Duke, T. T. Sherrod, G. P. Lupton</b>                                                                                                                                                    | 2000 | Primary tumor (not cutaneous metastasis) |
| <b>P. Nenoff, S. Kellermann, G. Borte, L. C. Horn, W. Ponisch, J. Winkler, U. F. Hausteil</b>                                                                                                     | 2000 | Primary tumor (not cutaneous metastasis) |
| <b>H. A. Brown, D. M. Sawyer, T. Woo</b>                                                                                                                                                          | 2000 | Primary tumor (not cutaneous metastasis) |
| <b>J. Rodriguez, J. E. Romaguera, J. Manning, N. Ordonez, C. Ha, F. Ravandi, F. Cabanillas</b>                                                                                                    | 2000 | Primary tumor (not cutaneous metastasis) |
| <b>P. Lin, D. Jones, D. M. Dorfman, L. J. Medeiros</b>                                                                                                                                            | 2000 | Primary tumor (not cutaneous metastasis) |
| <b>B. Al Bahrani, C. Henderson, G. Delaney</b>                                                                                                                                                    | 2000 | Primary tumor (not cutaneous metastasis) |
| <b>Menendez, Gonzalez, H. Cabrera, J. Mesa, G. Martinez, E. Espinoza, P. Hernandez</b>                                                                                                            | 2000 | Primary tumor (not cutaneous metastasis) |
| <b>S. J. Murphy</b>                                                                                                                                                                               | 2000 | Primary tumor (not cutaneous metastasis) |
|                                                                                                                                                                                                   | 2000 | Primary tumor (not cutaneous metastasis) |
| <b>A. Goel, V. Kaushal, H. S. Hooda, B. P. Das</b>                                                                                                                                                | 2000 | Primary tumor (not cutaneous metastasis) |
| <b>J. L. Gonzalez-Larriba, S. Serrano, M. Alvarez-Mon, F. Camacho, M. A. Casado, J. L. Diaz-Perez, E. Diaz-Rubio, L. Fosbrook, V. Guillem, J.</b>                                                 | 2000 | Primary tumor (not cutaneous metastasis) |

|                                                                                                                                                                               |      |                                          |
|-------------------------------------------------------------------------------------------------------------------------------------------------------------------------------|------|------------------------------------------|
| <b>J. Lopez-Lopez, J. A. Moreno-Nogueira, J. Toribio</b>                                                                                                                      |      |                                          |
| <b>W. Queisser, G. Hartung, A. Kopp-Schneider, P. Diezler, E. Hagmuller, A. Baur, J. Weniger, C. Wojatschek, N. Janssen, D. Hossfeld, H. Lindemann, T. Schnabel, L. Edler</b> | 2000 | Primary tumor (not cutaneous metastasis) |
| <b>J. Wang, N. C. J. Sun, Y. Nozawa, D. A. Arber, P. Chu, K. L. Chang, L. M. Weiss</b>                                                                                        | 2001 | Primary tumor (not cutaneous metastasis) |
| <b>D. S. Johnson, A. R. Solomon, C. V. Washington</b>                                                                                                                         | 2001 | Primary tumor (not cutaneous metastasis) |
| <b>S. Yetgin, L. Olcay, I. Yenicesu, A. F. Oner, M. Caglar</b>                                                                                                                | 2001 | Primary tumor (not cutaneous metastasis) |
| <b>V. K. Sondak</b>                                                                                                                                                           | 2001 | Primary tumor (not cutaneous metastasis) |
| <b>R. Corvò, M. Benasso, G. Sanguineti, R. Lionetto, A. Bacigalupo, G. Margarino, E. Pallestrini, M. Merlano, V. Vitale, R. Rosso</b>                                         | 2001 | Primary tumor (not cutaneous metastasis) |
| <b>A. K. Mels, M. G. Stadius Muller, P. A. Leeuwen, B. M. Blomberg, R. J. Scheper, M. A. Cuesta, R. H. Beelen, S. Meijer</b>                                                  | 2001 | Primary tumor (not cutaneous metastasis) |
| <b>S. K. Shetty, M. P. Rosen, V. Raptopoulos, S. N. Goldberg</b>                                                                                                              | 2001 | Primary tumor (not cutaneous metastasis) |
| <b>D. Czarnecki, T. Sutton, C. Czarnecki, G. Culjak</b>                                                                                                                       | 2002 | Primary tumor (not cutaneous metastasis) |
| <b>Y. Cohen, N. Daas, D. Libster, D. Gillon, A. Polliack</b>                                                                                                                  | 2002 | Primary tumor (not cutaneous metastasis) |
| <b>A. Ah-Weng, R. Charles-Holmes, P. Rose, S. Basu, J. R. Marsden, D. S. A. Sanders</b>                                                                                       | 2002 | Primary tumor (not cutaneous metastasis) |
| <b>T. Sakakibara, T. Kurasawa, K. Narumi, T. Kamano, M. Tsurumaru</b>                                                                                                         | 2002 | Primary tumor (not cutaneous metastasis) |
| <b>E. Bardet, L. Martin, G. Calais, C. Tuchais, J. Bourhis, B. Rhein, N. Feham, M. Alphonsi</b>                                                                               | 2002 | Primary tumor (not cutaneous metastasis) |
| <b>Y. M. Chen, R. P. Perng, Y. C. Lee, J. F. Shih, C. S. Lee, C. M. Tsai, J. Whang-Peng</b>                                                                                   | 2002 | Primary tumor (not cutaneous metastasis) |
| <b>M. B. Lens, M. Dawes, T. Goodacre, J. A. Bishop</b>                                                                                                                        | 2002 | Primary tumor (not cutaneous metastasis) |
| <b>L. Ping, L. Chengwen, Z. Hong, Y. Yuqiong, X. Yong, A. Ping</b>                                                                                                            | 2002 | Primary tumor (not cutaneous metastasis) |
| <b>W. W. Mayo-Smith, D. E. Dupuy, P. M. Parikh, J. A. Pezzullo, J. J. Cronan</b>                                                                                              | 2003 | Primary tumor (not cutaneous metastasis) |
| <b>K. H. Lee, J. H. Lee, S. J. Choi, J. H. Lee, S. Kim, M. Seol, Y. S. Lee, W. K. Kim, E. J. Seo, C. J. Park, H. S. Chi, J. S. Lee</b>                                        | 2003 | Primary tumor (not cutaneous metastasis) |
| <b>Y. H. Kim, G. Martinez, A. Varghese, R. T. Hoppe</b>                                                                                                                       | 2003 | Primary tumor (not cutaneous metastasis) |
| <b>P. Lin, C. Bueso-Ramos, C. S. Wilson, A. Mansoor, L. J. Medeiros</b>                                                                                                       | 2003 | Primary tumor (not cutaneous metastasis) |
| <b>M. S. Chapman, S. K. Spencer, J. B. Brennick</b>                                                                                                                           | 2003 | Primary tumor (not cutaneous metastasis) |
| <b>A. Hauschild, M. Weichenthal, B. R. Balda, J. C. Becker, H. H. Wolff, W. Tilgen, K. W. Schulte, J. Ring, D. Schadendorf, S. Lischner, G. Burg, R. Dummer</b>               | 2003 | Primary tumor (not cutaneous metastasis) |
| <b>D. Khayat, O. Rixe, G. Martin, C. Soubrane, M. Banzet, J. A. Bazex, P. Lauret, O. Vérola, G. Auclerc, P. Harper, P. Banzet</b>                                             | 2003 | Primary tumor (not cutaneous metastasis) |
| <b>R. Symonds Paul, J. Kirwan John, Chris Williams, E. Humber Caroline, Jayne Tierney, John Green, Mandy Collingwood</b>                                                      | 2003 | Primary tumor (not cutaneous metastasis) |
| <b>F. Wu, Z. B. Wang, Y. D. Cao, W. Z. Chen, J. Bai, J. Z. Zou, H. Zhu</b>                                                                                                    | 2003 | Primary tumor (not cutaneous metastasis) |
| <b>A. L. Rich, P. Berman</b>                                                                                                                                                  | 2004 | Primary tumor (not cutaneous metastasis) |
| <b>C. M. Munoz, J. L. Sanchez, R. F. Martin-Garcia</b>                                                                                                                        | 2004 | Primary tumor (not cutaneous metastasis) |

|                                                                                                                                                                           |      |                                                         |
|---------------------------------------------------------------------------------------------------------------------------------------------------------------------------|------|---------------------------------------------------------|
| <b>T. R. Humphreys, D. H. Finkelstein, J. B. Lee</b>                                                                                                                      | 2004 | metastasis)<br>Primary tumor (not cutaneous metastasis) |
| <b>K. J. Smith, S. Hamza, H. Skelton</b>                                                                                                                                  | 2004 | Primary tumor (not cutaneous metastasis)                |
| <b>F. J. Moloney, P. O. Kelly, E. W. Kay, P. Conlon, G. M. Murphy</b>                                                                                                     | 2004 | Primary tumor (not cutaneous metastasis)                |
| <b>C. H. J. Terhaard, H. Lubsen, I. Van Der Tweel, F. J. M. Hilgers, W. M. H. Eijkenboom, H. A. M. Marres, R. E. Tjho-Heslinga, J. M. A. De Jong, J. L. N. Roodenburg</b> | 2004 | Primary tumor (not cutaneous metastasis)                |
| <b>S. M. Swetter, P. M. Ecker, D. L. Johnson, J. D. Harvell</b>                                                                                                           | 2004 | Primary tumor (not cutaneous metastasis)                |
| <b>M. Mahalingam, J. Bhawan</b>                                                                                                                                           | 2004 | Primary tumor (not cutaneous metastasis)                |
| <b>E. Tse, R. H. S. Liang</b>                                                                                                                                             | 2004 | Primary tumor (not cutaneous metastasis)                |
| <b>C. Adem, C. Reynolds, J. N. Ingle, A. G. Nascimento</b>                                                                                                                | 2004 | Primary tumor (not cutaneous metastasis)                |
| <b>A. P. Lont, M. P. W. Gallee, P. Snijders, S. Horenblas</b>                                                                                                             | 2004 | Primary tumor (not cutaneous metastasis)                |
| <b>T. Terada, Y. Sato, K. Furukawa, M. Sugiura</b>                                                                                                                        | 2004 | Primary tumor (not cutaneous metastasis)                |
| <b>G. Bacci, C. Forni, A. Longhi, S. Ferrari, D. Donati, M. De Paolis, E. Barbieri, E. Pignotti, P. Rosito, M. Versari</b>                                                | 2004 | Primary tumor (not cutaneous metastasis)                |
| <b>N. E. Thomas, P. Groben</b>                                                                                                                                            | 2004 | Primary tumor (not cutaneous metastasis)                |
| <b>I. Garcia-Morales, A. Herrera-Saval, J. J. Rios, F. Camacho</b>                                                                                                        | 2004 | Primary tumor (not cutaneous metastasis)                |
| <b>Chris Coppin, Franz Porzsolt, Michael Autenrieth, Julia Kumpf, Andrew Coldman, Timothy Wilt</b>                                                                        | 2004 | Primary tumor (not cutaneous metastasis)                |
| <b>Daniel Galandi, Gerd Antes</b>                                                                                                                                         | 2004 | Primary tumor (not cutaneous metastasis)                |
| <b>Andrew Renehan, P. Saunders Mark, James Hill, Roger James, T. O'Dwyer Sarah</b>                                                                                        | 2004 | Primary tumor (not cutaneous metastasis)                |
| <b>K. E. Volmar, T. J. Cummings, W. H. Wang, A. J. Creager, D. S. Tyler, H. B. Xie</b>                                                                                    | 2005 | Primary tumor (not cutaneous metastasis)                |
| <b>T. Schulz, S. Proske, W. Hartschuh, H. Kurzen, E. Paul, P. H. Wunsch</b>                                                                                               | 2005 | Primary tumor (not cutaneous metastasis)                |
| <b>H. Adamski, J. Le Lan, S. Chevrier, B. Cribier, E. Watier, J. Chevrant-Breton</b>                                                                                      | 2005 | Primary tumor (not cutaneous metastasis)                |
| <b>H. R. Jin, J. Y. Lee, W. L. Dong, S. O. Shin, Y. S. Choi, S. J. Yoo, T. Y. Yoon</b>                                                                                    | 2005 | Primary tumor (not cutaneous metastasis)                |
| <b>C. Lok, V. Viseux, J. P. Denoeux, M. Bagot</b>                                                                                                                         | 2005 | Primary tumor (not cutaneous metastasis)                |
| <b>K. S. Asgeirsson, B. Holroyd, D. A. L. Morgan, J. F. R. Robertson, R. W. Blamey, S. E. Pinder, R. D. Macmillan</b>                                                     | 2005 | Primary tumor (not cutaneous metastasis)                |
| <b>G. E. J. Forton, G. Van Parys, K. Hertveldt</b>                                                                                                                        | 2005 | Primary tumor (not cutaneous metastasis)                |
| <b>M. K. Tae, H. P. Yeon, S. Y. Lee, J. H. Kim, D. W. Kim, S. A. Im, T. Y. Kim, W. K. Chul, S. H. Dae, Y. J. Bang, K. H. Chang, K. K. Noe</b>                             | 2005 | Primary tumor (not cutaneous metastasis)                |
| <b>T. Y. Eng, C. R. Thomas Jr</b>                                                                                                                                         | 2005 | Primary tumor (not cutaneous metastasis)                |
| <b>G. M. Higa, R. F. Kovach, J. Abraham</b>                                                                                                                               | 2005 | Primary tumor (not cutaneous metastasis)                |
| <b>K. Tsuji, D. Suzuki, Y. Naito, Y. Sato, T. Yoshino, K. Iwatsuki</b>                                                                                                    | 2005 | Primary tumor (not cutaneous metastasis)                |

|                                                                                                                                                                                   |      |                                          |
|-----------------------------------------------------------------------------------------------------------------------------------------------------------------------------------|------|------------------------------------------|
| <b>A. Joao, E. Bartolo, C. Joao</b>                                                                                                                                               | 2005 | Primary tumor (not cutaneous metastasis) |
| <b>K. G. Lewis, M. A. Weinstock, A. L. Weaver, C. C. Otley</b>                                                                                                                    | 2006 | Primary tumor (not cutaneous metastasis) |
| <b>R. A. Kinhikar, P. K. Sharma, C. M. Tambe, U. M. Mahantshetty, R. Sarin, D. D. Deshpande, S. K. Shrivastava</b>                                                                | 2006 | Primary tumor (not cutaneous metastasis) |
| <b>J. Bonadio, W. Armstrong, M. Gu</b>                                                                                                                                            | 2006 | Primary tumor (not cutaneous metastasis) |
| <b>M. Reid-Nicholson, P. Iyengar, M. A. Friedlander, O. Lin</b>                                                                                                                   | 2006 | Primary tumor (not cutaneous metastasis) |
| <b>J. L. Uriburu, H. D. Vuoto, L. Cogorno, J. A. Isetta, G. Candas, G. C. Imach, O. L. Bernabo</b>                                                                                | 2006 | Primary tumor (not cutaneous metastasis) |
| <b>R. Cecchi, V. Rapicano</b>                                                                                                                                                     | 2006 | Primary tumor (not cutaneous metastasis) |
| <b>R. H. Decker, L. D. Wilson</b>                                                                                                                                                 | 2006 | Primary tumor (not cutaneous metastasis) |
| <b>K. W. Lee, T. Yun, D. W. Kim, S. A. Im, T. Y. Kim, S. S. Yoon, D. S. Heo, Y. J. Bang, S. Park, B. K. Kim, N. K. Kim</b>                                                        | 2006 | Primary tumor (not cutaneous metastasis) |
| <b>A. Courdi, C. Ortholan, J. M. Hannoun-Levi, J. M. Ferrero, R. Largillier, C. Balu-Maestro, C. Chapellier, F. Ettore, I. Birtwisle-Peyrottes</b>                                | 2006 | Primary tumor (not cutaneous metastasis) |
| <b>E. Ishii, M. Oda, N. Kinugawa, T. Oda, T. Takimoto, N. Suzuki, Y. Kosaka, A. Ohara, A. Ogawa, M. Ishii, N. Sakata, T. Okamura, K. Koike, S. Kojima, K. Horibe, S. Mizutani</b> | 2006 | Primary tumor (not cutaneous metastasis) |
| <b>J. Z. Cooper, M. D. Brown</b>                                                                                                                                                  | 2006 | Primary tumor (not cutaneous metastasis) |
| <b>O. Rouviere, R. Bouvier, S. Negrier, L. Badet, D. Lyonnet</b>                                                                                                                  | 2006 | Primary tumor (not cutaneous metastasis) |
| <b>C. O. Suh, S. J. Shim, S. w Lee, W. I. Yang, S. Y. Lee, J. S. Hahn</b>                                                                                                         | 2006 | Primary tumor (not cutaneous metastasis) |
| <b>I. Cunningham</b>                                                                                                                                                              | 2006 | Primary tumor (not cutaneous metastasis) |
| <b>M. S. Y. Goh</b>                                                                                                                                                               | 2006 | Primary tumor (not cutaneous metastasis) |
| <b>I. Nemoto, A. Shibaki, S. Aoyagi, Y. Tsuji-abe, H. Shimizu</b>                                                                                                                 | 2006 | Primary tumor (not cutaneous metastasis) |
| <b>C. T. Wilson</b>                                                                                                                                                               | 2006 | Primary tumor (not cutaneous metastasis) |
| <b>F. F. Onol, Y. Tandr, E. Kotilolu, M. Bayramicli, S. Turhal, L. N. Turkeri</b>                                                                                                 | 2006 | Primary tumor (not cutaneous metastasis) |
| <b>D. T. Chang, R. J. Amdur, C. G. Morris, W. M. Mendenhall</b>                                                                                                                   | 2006 | Primary tumor (not cutaneous metastasis) |
| <b>Daniel Hind, Lynda Wyld, Catherine Beverley, W. Reed Malcolm</b>                                                                                                               | 2006 | Primary tumor (not cutaneous metastasis) |
| <b>Satish Kumar, Mike Shelley, Craig Harrison, Bernadette Coles, J. Wilt Timothy, Malcolm Mason</b>                                                                               | 2006 | Primary tumor (not cutaneous metastasis) |
| <b>S. Mussari, W. Sabino Della Sala, L. Busana, V. Vanoni, C. Eccher, B. Zani, L. Menegotti, L. Tomio</b>                                                                         | 2006 | Primary tumor (not cutaneous metastasis) |
| <b>M. Niewald, J. Freyd, J. Fleckenstein, B. Wullich, C. Rube</b>                                                                                                                 | 2006 | Primary tumor (not cutaneous metastasis) |
| <b>Keung Yuen Kwok, Mike Shelley, Man Sze Wai, J. Wilt Timothy, Malcolm Mason</b>                                                                                                 | 2006 | Primary tumor (not cutaneous metastasis) |
| <b>E. M. Noorda, R. H. J. van Kreij, B. C. Vrouwenraets, O. E. Nieweg, M. Muller, B. B. R. Kroon, N. K. Aaronson</b>                                                              | 2007 | Primary tumor (not cutaneous metastasis) |
| <b>F. D. Leonhardt, A. Zanoni, F. Ponce, L. Haddad, C. S. Neto, O. Cervantes, M. Abrahao</b>                                                                                      | 2007 | Primary tumor (not cutaneous metastasis) |

|                                                                                                                                                              |      |                                          |
|--------------------------------------------------------------------------------------------------------------------------------------------------------------|------|------------------------------------------|
| <b>G. P. Lozzi, H. P. Soyer, J. Fruehauf, C. Massone, H. Kerl, K. Peris</b>                                                                                  | 2007 | Primary tumor (not cutaneous metastasis) |
| <b>Y. Tokura, K. Sugita, H. Yagi, T. Shimauchi, K. Kabashima, M. Takigawa</b>                                                                                | 2007 | Primary tumor (not cutaneous metastasis) |
| <b>E. Robak, T. Robak</b>                                                                                                                                    | 2007 | Primary tumor (not cutaneous metastasis) |
| <b>A. Aviles, S. Cleto, C. Castaneda, M. J. Nambo</b>                                                                                                        | 2007 | Primary tumor (not cutaneous metastasis) |
| <b>Y. Kikushige, K. Takase, K. Sata, K. I. Aoki, A. Numata, T. Miyamoto, T. Fukuda, H. Gondo, M. Harada, K. Nagafuji</b>                                     | 2007 | Primary tumor (not cutaneous metastasis) |
| <b>F. Palazzo, K. R. Kaulback, J. L. Wagner, G. A. Lindenbaum, M. J. Cohen</b>                                                                               | 2007 | Primary tumor (not cutaneous metastasis) |
| <b>S. Avitia, J. S. Hamilton, R. F. Osborne</b>                                                                                                              | 2007 | Primary tumor (not cutaneous metastasis) |
| <b>C. Vassallo, F. Muzio, V. Brazzelli, O. Ester, M. Lazzarino, G. Borroni</b>                                                                               | 2007 | Primary tumor (not cutaneous metastasis) |
| <b>J. Geisse</b>                                                                                                                                             | 2007 | Primary tumor (not cutaneous metastasis) |
| <b>G. Gallagher, M. Chhanabhai, K. W. Song, M. J. Barnett</b>                                                                                                | 2007 | Primary tumor (not cutaneous metastasis) |
| <b>Thomas Ferguson, Nicholas Wilcken, Rosemary Vagg, Davina Gherzi, K. Nowak Anna</b>                                                                        | 2007 | Primary tumor (not cutaneous metastasis) |
| <b>Mark Jeffery, E. Hickey Brigid, N. Hider Phil</b>                                                                                                         | 2007 | Primary tumor (not cutaneous metastasis) |
| <b>M. B. Lens, P. Nathan, V. Bataille</b>                                                                                                                    | 2007 | Primary tumor (not cutaneous metastasis) |
| <b>L. Rusciani, I. Proietti, A. Paradisi, A. Rusciani, G. Guerriero, A. Mammone, A. Gaetano, S. Lippa</b>                                                    | 2007 | Primary tumor (not cutaneous metastasis) |
| <b>H. Tashiro, T. Sagawa, K. Okada, T. Kurokawa, H. Soga, R. Watanabe, Y. Yasuoka, K. Honda, Y. Watanabe, J. Gangi, S. Akehi, J. Masuda, M. Nomoto</b>       | 2007 | Primary tumor (not cutaneous metastasis) |
| <b>K. S. Wong Rebecca, Ved Tandan, Shiroma De Silva, Alvaro Figueredo</b>                                                                                    | 2007 | Primary tumor (not cutaneous metastasis) |
| <b>K. Tanaka, S. Imoto, N. Wada, N. Sakemura, K. Hasebe</b>                                                                                                  | 2008 | Primary tumor (not cutaneous metastasis) |
| <b>M. A. Pereira, T. Baudrier, A. Costa, J. Magalhaes, F. Azevedo</b>                                                                                        | 2008 | Primary tumor (not cutaneous metastasis) |
| <b>A. Sandner, P. Helmbold, M. Winkler, S. Gattenlohner, H. K. Muller-Hermelink, H. J. Holzhausen</b>                                                        | 2008 | Primary tumor (not cutaneous metastasis) |
| <b>R. Niimi, A. Matsumine, K. Kusuzaki, S. Kuratsu, N. Araki, Y. Aoki, T. Ueda, I. Kudawara, A. Myoui, M. Ieguchi, N. Hashimoto, H. Yoshikawa, A. Uchida</b> | 2008 | Primary tumor (not cutaneous metastasis) |
| <b>U. Amarasena Isuru, A. E. Walters Julia, Richard Wood-Baker, Kwun Fong</b>                                                                                | 2008 | Primary tumor (not cutaneous metastasis) |
| <b>R. Jalali, R. Malde, R. Bhutani, A. Budrukkar, R. Badwe, R. Sarin</b>                                                                                     | 2008 | Primary tumor (not cutaneous metastasis) |
| <b>Esther Kuhry, Wolfgang Schwenk, Robin Gaupset, Ulla Romild, H. Jaap Bonjer</b>                                                                            | 2008 | Primary tumor (not cutaneous metastasis) |
| <b>Smruta Shanbhag, Mary Cairns, Margaret Cruickshank, O. Dickinson Heather, Sath Gokul, David Parkin</b>                                                    | 2008 | Primary tumor (not cutaneous metastasis) |
| <b>M. Shariff Osman, L. Wulff Judith, C. William Helm</b>                                                                                                    | 2008 | Primary tumor (not cutaneous metastasis) |
| <b>M. Archontaki, S. D. Stavrianos, D. P. Korkolis, N. Arnogiannaki, V. Vassiliadis, I. E. Liapakis, H. Christ, A. D. Rapidis, G. Kokkalis</b>               | 2009 | Primary tumor (not cutaneous metastasis) |
| <b>C. C. Lee, M. B. Faries, X. Ye, D. L. Morton</b>                                                                                                          | 2009 | Primary tumor (not cutaneous metastasis) |

|                                                                                                                                                                                                                                                   |      |                                          |
|---------------------------------------------------------------------------------------------------------------------------------------------------------------------------------------------------------------------------------------------------|------|------------------------------------------|
| <b>G. Hatoum, C. Takita, M. Abdel-Wahab, M. Demars, S. Kandula, C. Bradley, C. Lee</b>                                                                                                                                                            | 2009 | Primary tumor (not cutaneous metastasis) |
| <b>F. Trindade, R. Cabrera, V. Aires, J. Rosa</b>                                                                                                                                                                                                 | 2009 | Primary tumor (not cutaneous metastasis) |
| <b>A. Juarez, R. Goiriz, I. Dominguez-Fernandez, V. Gomez-Garcia de Soria, R. Camara, J. Fraga, A. Garcia-Diez</b>                                                                                                                                | 2009 | Primary tumor (not cutaneous metastasis) |
| <b>M. Koga, Y. Yoshida, K. Koga, J. Nakayama</b>                                                                                                                                                                                                  | 2009 | Primary tumor (not cutaneous metastasis) |
| <b>M. Nassiri, G. E. Byrne, C. C. Whitcomb, J. J. Byrnes</b>                                                                                                                                                                                      | 2009 | Primary tumor (not cutaneous metastasis) |
| <b>Annabel Goodwin, Sharon Parker, Davina Gherzi, Nicholas Wilcken</b>                                                                                                                                                                            | 2009 | Primary tumor (not cutaneous metastasis) |
| <b>J. Sladden Michael, Charles Balch, A. Barzilai David, Daniel Berg, Anatoli Freiman, Teenah Handiside, Sally Hollis, B. Lens Marko, F. Thompson John</b>                                                                                        | 2009 | Primary tumor (not cutaneous metastasis) |
| <b>X. C. Wang, X. B. Huang, W. D. Zhang, M. Z. Liu, X. X. Guang, X. Q. Liu</b>                                                                                                                                                                    | 2009 | Primary tumor (not cutaneous metastasis) |
| <b>Desmond Yip, Christos Karapetis, Andrew Strickland, B. Steer</b>                                                                                                                                                                               | 2009 | Primary tumor (not cutaneous metastasis) |
| <b>Christopher, David Goldstein</b>                                                                                                                                                                                                               |      |                                          |
| <b>T. Shimauchi, K. Sugita, M. Nakamura, Y. Tokura</b>                                                                                                                                                                                            | 2010 | Primary tumor (not cutaneous metastasis) |
| <b>I. M. Scholz, W. Hartschuh</b>                                                                                                                                                                                                                 | 2010 | Primary tumor (not cutaneous metastasis) |
| <b>S. K. A. Nguyen, A. Dagnault</b>                                                                                                                                                                                                               | 2010 | Primary tumor (not cutaneous metastasis) |
| <b>D. Schrama, A. Thiemann, R. Houben, K. C. Kahler, J. C. Becker, A. Hauschild</b>                                                                                                                                                               | 2010 | Primary tumor (not cutaneous metastasis) |
| <b>A. Tendas, P. Niscola, S. Fratoni, L. Cupelli, L. Morino, B. Neri, M. Ales, L. Scaramucci, M. Giovannini, R. Barbati, T. Dentamaro, P. De Fabritiis</b>                                                                                        | 2010 | Primary tumor (not cutaneous metastasis) |
| <b>S. Takeuchi, E. Akasaka, D. Rokunohe, S. J. Kayo, Y. Matsuzaki, H. Ooshima, H. Nakano, D. Sawamura</b>                                                                                                                                         | 2010 | Primary tumor (not cutaneous metastasis) |
| <b>Khadra Galaal, Raj Naik, E. Bristow Robert, Amit Patel, Andrew Bryant, O. Dickinson Heather</b>                                                                                                                                                | 2010 | Primary tumor (not cutaneous metastasis) |
| <b>A. Hauschild, M. Weichenthal, K. Rass, R. Linse, C. Berking, J. Böttjer, T. Vogt, K. Spieth, T. Eigentler, N. H. Brockmeyer, A. Stein, H. Näher, D. Schadendorf, P. Mohr, M. Kaatz, M. Tronnier, R. Hein, G. Schuler, F. Egberts, C. Garbe</b> | 2010 | Primary tumor (not cutaneous metastasis) |
| <b>L. James Melissa, Margot Lehman, N. Hider Phil, Mark Jeffery, E. Hickey Brigid, P. Francis Daniel</b>                                                                                                                                          | 2010 | Primary tumor (not cutaneous metastasis) |
| <b>S. Lanitis, P. P. Tekkis, G. Sgourakis, N. Dimopoulos, R. Al Mufti, D. J. Hadjiminias</b>                                                                                                                                                      | 2010 | Primary tumor (not cutaneous metastasis) |
| <b>Louise Lansbury, Jo Leonardi-Bee, William Perkins, Timothy Goodacre, A. Tweed John, J. Bath-Hextall Fiona</b>                                                                                                                                  | 2010 | Primary tumor (not cutaneous metastasis) |
| <b>Ludy Lutgens, Jacoba van der Zee, Madelon Pijls-Johannesma, F. M. De Haas-Kock Danielle, Jeroen Buijsen, A. P. G. van Mastrigt Ghislaine, Guido Lammering, K. M. De Ruysscher Dirk, Philippe Lambin</b>                                        | 2010 | Primary tumor (not cutaneous metastasis) |
| <b>K. S. Wong Rebecca, Richard Malthaner</b>                                                                                                                                                                                                      | 2010 | Primary tumor (not cutaneous metastasis) |
| <b>H. Miida, M. Ito, E. Sakata, Y. Koyama</b>                                                                                                                                                                                                     | 2011 | Primary tumor (not cutaneous metastasis) |
| <b>U. Wollina, A. Schreiber, K. Merla, G. Haroske</b>                                                                                                                                                                                             | 2011 | Primary tumor (not cutaneous metastasis) |
| <b>A. M. Avolio, S. Lee, S. Mann</b>                                                                                                                                                                                                              | 2011 | Primary tumor (not cutaneous metastasis) |

|                                                                                                                                                                                                                |      |                                          |
|----------------------------------------------------------------------------------------------------------------------------------------------------------------------------------------------------------------|------|------------------------------------------|
| <b>M. Bonet Beltran, A. D. Roth, G. Mentha, A. S. Allal</b>                                                                                                                                                    | 2011 | Primary tumor (not cutaneous metastasis) |
| <b>S. M. Schmid, A. A. Modlasiak, M. E. Myrick, N. Kilic, C. T. Viehl, A. Schotzau, U. Guth</b>                                                                                                                | 2011 | Primary tumor (not cutaneous metastasis) |
| <b>R. C. Gaba, J. P. Kenny, P. Gundavaram, J. R. Katz, L. R. Aquino Escuadro, S. Gaitonde</b>                                                                                                                  | 2011 | Primary tumor (not cutaneous metastasis) |
| <b>I. J. Lee, J. Seong</b>                                                                                                                                                                                     | 2011 | Primary tumor (not cutaneous metastasis) |
| <b>A. P. Murchison, J. D. Walrath, C. V. Washington</b>                                                                                                                                                        | 2011 | Primary tumor (not cutaneous metastasis) |
| <b>D. Tiodorovic-Zivkovic, G. Argenziano, C. Catricala, G. Ferrara, C. M. Giorgio, E. Moscarella, I. Zalaudek</b>                                                                                              | 2011 | Primary tumor (not cutaneous metastasis) |
| <b>J. C. Lin, D. C. Chan, P. J. Chen, H. C. Chu, T. H. Chueh, H. H. Huang, P. Y. Chang, C. P. Yu, W. K. Chang, T. Y. Hsieh</b>                                                                                 | 2011 | Primary tumor (not cutaneous metastasis) |
| <b>S. Nakayama-Ichihama, T. Yokote, N. Hiraoka, T. Takubo, M. Tsuji, T. Hanafusa</b>                                                                                                                           | 2011 | Primary tumor (not cutaneous metastasis) |
| <b>N. Oiso, Y. Tatsumi, S. Rai, I. Matsumura, A. Kawada</b>                                                                                                                                                    | 2011 | Primary tumor (not cutaneous metastasis) |
| <b>Tiffany Daly, E. Hickey Brigid, Margot Lehman, P. Francis Daniel, M. See Adrienne</b>                                                                                                                       | 2011 | Primary tumor (not cutaneous metastasis) |
| <b>Nick Johnson, Andrew Bryant, Tracie Miles, Thomas Hogberg, Paul Cornes</b>                                                                                                                                  | 2011 | Primary tumor (not cutaneous metastasis) |
| <b>A. J. Scherr, J. P. Lima, E. C. Sasse, C. S. Lima, A. D. Sasse</b>                                                                                                                                          | 2011 | Primary tumor (not cutaneous metastasis) |
| <b>Feng Shang Pan, Joey Kwong, Ping Wang Zhi, Jinhui Tian, Lei Jiang, KeHu Yang, Jin Yue Zhong, Qiang Tian Jun</b>                                                                                             | 2011 | Primary tumor (not cutaneous metastasis) |
| <b>T. S. Shylasree, Andrew Bryant, E. J. Howells Robert</b>                                                                                                                                                    | 2011 | Primary tumor (not cutaneous metastasis) |
| <b>Jacobus van der Velden, Guus Fons, A. Lawrie Theresa</b>                                                                                                                                                    | 2011 | Primary tumor (not cutaneous metastasis) |
| <b>B. Karakullukcu, H. J. Nyst, R. L. van Veen, F. J. Hoebbers, O. Hamming-Vrieze, M. J. Witjes, S. A. de Visscher, F. R. Burlage, P. C. Levendag, H. J. Sterenborg, I. B. Tan</b>                             | 2012 | Primary tumor (not cutaneous metastasis) |
| <b>U. Mohammed, Y. Iliyasu</b>                                                                                                                                                                                 | 2012 | Primary tumor (not cutaneous metastasis) |
| <b>A. Geretschlager, B. Bojaxhiu, S. Crowe, A. Arnold, P. Manser, W. Hallermann, D. M. Aebersold, P. Ghadjar</b>                                                                                               | 2012 | Primary tumor (not cutaneous metastasis) |
| <b>L. Pastor-Jane, A. Raventos-Estelle, J. Garcia-Fontgivell, J. Pujol-Montcusie, M. Simo-Esque, P. Turegano-Fuentes</b>                                                                                       | 2012 | Primary tumor (not cutaneous metastasis) |
| <b>Y. Q. Liu, W. Y. Zhu, Y. Q. Shu, Y. H. Gu</b>                                                                                                                                                               | 2012 | Primary tumor (not cutaneous metastasis) |
| <b>P. Kumar, S. Thukuntla, J. Eskew</b>                                                                                                                                                                        | 2012 | Primary tumor (not cutaneous metastasis) |
| <b>D. Hoshina, K. Arita, O. Mizuno, K. Fujimoto, M. Nishio, T. Kondo, R. Abe, H. Shimizu</b>                                                                                                                   | 2012 | Primary tumor (not cutaneous metastasis) |
| <b>C. K. Yeung, A. Y. H. Leung, N. J. Trendell-Smith, Y. L. Kwong</b>                                                                                                                                          | 2012 | Primary tumor (not cutaneous metastasis) |
| <b>S. Deva, M. Jameson</b>                                                                                                                                                                                     | 2012 | Primary tumor (not cutaneous metastasis) |
| <b>J. Eckardt, P. B. Licht</b>                                                                                                                                                                                 | 2012 | Primary tumor (not cutaneous metastasis) |
| <b>K. Galaal, A. Bryant, A. D. Fisher, M. Al-Khaduri, F. Kew, A. D. Lopes</b>                                                                                                                                  | 2012 | Primary tumor (not cutaneous metastasis) |
| <b>R. D. Hofheinz, F. Wenz, S. Post, A. Matzdorff, S. Laechelt, J. T. Hartmann, L. Müller, H. Link, M. Moehler, E. Kettner, E. Fritz, U. Hieber, H. W. Lindemann, M. Grunewald, S. Kremers, C. Constantin,</b> | 2012 | Primary tumor (not cutaneous metastasis) |



---

|                                                                                                                                   |      |                                          |
|-----------------------------------------------------------------------------------------------------------------------------------|------|------------------------------------------|
| <b>M. Hipp, G. Hartung, D. Gencer, P. Kienle, I. Burkholder, A. Hochhaus</b>                                                      |      |                                          |
| <b>A. Kong, N. Johnson, H. C. Kitchener, T. A. Lawrie</b>                                                                         | 2012 | Primary tumor (not cutaneous metastasis) |
| <b>L. Moja, L. Tagliabue, S. Balduzzi, E. Parmelli, V. Pistotti, V. Guarneri, R. D'Amico</b>                                      | 2012 | Primary tumor (not cutaneous metastasis) |
| <b>J. Morrison, K. Haldar, S. Kehoe, T. A. Lawrie</b>                                                                             | 2012 | Primary tumor (not cutaneous metastasis) |
| <b>K. Narayanan, H. Hadid Omar, A. Barnes Eric</b>                                                                                | 2012 | Primary tumor (not cutaneous metastasis) |
| <b>L. Reveiz, J.-R. Rueda, F. C. Andrés</b>                                                                                       | 2012 | Primary tumor (not cutaneous metastasis) |
| <b>L. Rogers, S.S. Shun, D. Luesley, A. Bryant, H. O. Dickinson</b>                                                               | 2012 | Primary tumor (not cutaneous metastasis) |
| <b>D. D. Rosa, L. R. Medeiros, M. I. Edelweiss, P. R. Pohlmann, A. T. Stein</b>                                                   | 2012 | Primary tumor (not cutaneous metastasis) |
| <b>H. Staley, I. McCallum, J. Bruce</b>                                                                                           | 2012 | Primary tumor (not cutaneous metastasis) |
| <b>T. Weberschock, R. Strametz, M. Lorenz, C. Röllig, C. Bunch, A. Bauer, J. Schmitt</b>                                          | 2012 | Primary tumor (not cutaneous metastasis) |
| <b>B. A. Winter-Roach, H. C. Kitchener, T. A. Lawrie</b>                                                                          | 2012 | Primary tumor (not cutaneous metastasis) |
| <b>D. Makower, J. A. Sparano</b>                                                                                                  | 2013 | Primary tumor (not cutaneous metastasis) |
| <b>S. Heinisch, L. J. Geskin</b>                                                                                                  | 2013 | Primary tumor (not cutaneous metastasis) |
| <b>M. Braclik, R. Kwiatkowski, D. K. Nenko</b>                                                                                    | 2013 | Primary tumor (not cutaneous metastasis) |
| <b>Y. Jiang, Y. Zhao, X. Dong, S. Zhang, Y. Li, G. Wu</b>                                                                         | 2013 | Primary tumor (not cutaneous metastasis) |
| <b>J. Fatima, A. A. Duncan, J. J. Maleszewski, M. Kalra, G. S. Oderich, P. Glociczki, R. M. Suri, T. C. Bower</b>                 | 2013 | Primary tumor (not cutaneous metastasis) |
| <b>S. Keskin, F. Tas, S. Vatansever</b>                                                                                           | 2013 | Primary tumor (not cutaneous metastasis) |
| <b>F. M. Paschoal, C. N. Andreoni, L. C. M. Azevedo, A. Yoradjian, L. M. D. S. Cattini</b>                                        | 2013 | Primary tumor (not cutaneous metastasis) |
| <b>T. Nakamura, R. J. Grimer, S. R. Carter, R. M. Tillman, A. Abudu, L. Jeys, A. Sudo</b>                                         | 2013 | Primary tumor (not cutaneous metastasis) |
| <b>A. Hauschild, H. Breuninger, R. Kaufmann, R. DieterKortmann, M. Klein, J. Werner, J. Reifenberger, T. Dirschka, C. Garbe</b>   | 2013 | Primary tumor (not cutaneous metastasis) |
| <b>S. Ugurel, R. D. Kortmann, P. Mohr, T. Mentzel, C. Garbe, H. Breuninger</b>                                                    | 2013 | Primary tumor (not cutaneous metastasis) |
| <b>T. Kobayashi, A. Hangaishi, G. Yamamoto, A. Shinohara, T. Morikawa, Y. Takazawa, S. Ota, Y. Imai, F. Nakamura, M. Kurokawa</b> | 2013 | Primary tumor (not cutaneous metastasis) |
| <b>Z. Apalla, T. Tzellos, A. Kyrgidis, S. Mocellin, A.-W. Chan, S. H. Hussain, P. Pilati</b>                                      | 2013 | Primary tumor (not cutaneous metastasis) |
| <b>F. J. Bath-Hextall, R. N. Matin, D. Wilkinson, J. Leonardi-Bee</b>                                                             | 2013 | Primary tumor (not cutaneous metastasis) |
| <b>K. Galaal, E. van der Heijden, K. Godfrey, R. Naik, A. Kucukmetin, A. Bryant, N. Das, A. D. Lopes</b>                          | 2013 | Primary tumor (not cutaneous metastasis) |
| <b>S. A. Hanna, G. N. Marta, R. Riera, J. L. F. da Silva, H. de Andrade Carvalho, A. C. S. D. De Barros</b>                       | 2013 | Primary tumor (not cutaneous metastasis) |
| <b>E. Hickey Brigid, P. Francis Daniel, Margot Lehman</b>                                                                         | 2013 | Primary tumor (not cutaneous metastasis) |
| <b>F. Peinemann, C. Bartel, U. Grouven, F. Berthold</b>                                                                           | 2013 | Primary tumor (not cutaneous metastasis) |

---

|                                                                                                            |      |                                          |
|------------------------------------------------------------------------------------------------------------|------|------------------------------------------|
| <b>A. M. Rao, I. Ahmed</b>                                                                                 | 2013 | Primary tumor (not cutaneous metastasis) |
| <b>S. Tangjitgamol, K. Katanyoo, P. Lumbiganon, S. Manusirivithaya, M. Laopaiboon, B. Supawattanabodee</b> | 2013 | Primary tumor (not cutaneous metastasis) |

<sup>a</sup> Only one reason for exclusion is listed per study; however, many studies had multiple reasons for exclusion.

All 14 records from ClinicalTrials.gov were excluded secondary to study results not being reported at this time:

#### **Study 1**

Title: Palliative Treatment of Ulcerated Cutaneous Metastases: Trial Between Electrochemotherapy and Radiotherapy

Recruitment: Withdrawn

Study Results: No results available

Conditions: Ulcerated cutaneous metastases

Interventions: Drug: electrochemotherapy|radiation: radiotherapy|drug: bleomycin

<http://ClinicalTrials.gov/show/NCT00918593>

#### **Study 2**

Title: Toll-like Receptor (TLR) 7 Agonist and Radiotherapy for Breast Cancer With Skin Metastases

Recruitment: Recruiting

Study Results: No results available

Conditions: Breast cancer|metastatic breast cancer|recurrent breast cancer

Interventions: Radiation: radiation|drug: imiquimod

<http://ClinicalTrials.gov/show/NCT01421017>

#### **Study 3**

Title: Electrochemotherapy for the Treatment of Breast Cancer That Has Spread to the Skin

Recruitment: Recruiting

Study Results: No results available

Conditions: Breast cancer|skin metastases

Interventions: Drug: electrochemotherapy

<http://ClinicalTrials.gov/show/NCT01479946>

#### **Study 4**

Title: Combination Therapy of Topical Imiquimod Plus Multi-peptide Vaccination for Cutaneous Metastases of Melanoma

Recruitment: Recruiting

Study Results: No results available

Conditions: Melanoma

Interventions: Biological: MELITAC 12.1|drug: imiquimod

<http://ClinicalTrials.gov/show/NCT01264731>

#### **Study 5**

Title: Topical Imiquimod and Abraxane in Treating Patients With Advanced Breast Cancer

Recruitment: Active, not recruiting

Study Results: No results available

Conditions: Male breast cancer|recurrent breast cancer|skin metastases|stage IV breast cancer

Interventions: Drug: imiquimod|drug: abraxane|other: laboratory biomarker analysis|genetic: RNA

analysis|other: immunoenzyme technique  
<http://ClinicalTrials.gov/show/NCT00821964>

#### Study 6

Title: Treatment of Cutaneous Metastases With Diphenylcyclopropenone (DPCP)  
Recruitment: Recruiting  
Study Results: No results available  
Conditions: Neoplasm metastasis|melanoma  
Interventions: Drug: diphenylcyclopropenone (DPCP)  
<http://ClinicalTrials.gov/show/NCT01711684>

#### Study 7

Title: Peritumoral Injection of Immature Dendritic Cells to Irradiated Skin Metastases of Solid Tumors  
Recruitment: Recruiting  
Study Results: No results available  
Conditions: Cancer of skin|solid tumors  
Interventions: Procedure: immunotherapy treatment for solid tumors  
<http://ClinicalTrials.gov/show/NCT00278018>

#### Study 8

Title: Safety Study Using Photodynamic Therapy Light Therapy for Patients With Chest Wall Progression of Breast Cancer and Satellite Metastases of Melanoma  
Recruitment: Completed  
Study Results: No Results Available  
Conditions: Breast Cancer|Skin Cancer  
Interventions: Device: CLIPT patch  
<http://ClinicalTrials.gov/show/NCT00862901>

#### Study 9

Title: Photodynamic Therapy in Treating Patients With Skin Cancer or Solid Tumors Metastatic to the Skin  
Recruitment: Terminated  
Study Results: No Results Available  
Conditions: Breast cancer|head and neck cancer|lymphoma|metastatic cancer|non-melanomatous skin cancer|sarcoma  
Interventions: Drug: silicon phthalocyanine 4  
<http://ClinicalTrials.gov/show/NCT00023790>

#### Study 10

Title: Imiquimod for Breast Cancer Patients With Chest Wall Recurrence or Skin Metastases  
Recruitment: Active, not recruiting  
Study Results: has results  
Conditions: Breast cancer|breast neoplasms  
Interventions: Drug: imiquimod  
<http://ClinicalTrials.gov/show/NCT00899574>

#### Study 11

Title: Electrochemotherapy as a Palliative Treatment for Brain Metastases  
Recruitment: Terminated  
Study Results: No results available  
Conditions: Brain metastases|CNS metastases  
Interventions: Device: The electroporation system|drug: bleomycin  
<http://ClinicalTrials.gov/show/NCT01322100>

#### Study 12

Title: A Novel Treatment for Metastatic Melanoma  
Recruitment: Recruiting

Study Results: No results available  
Conditions: Metastatic melanoma  
Interventions: Other: photoimmunotherapy  
<http://ClinicalTrials.gov/show/NCT00758797>

#### **Study 13**

Title: Study to Identify Molecular Mechanisms of Clinical Resistance to Chemotherapy in Triple Negative Breast Cancer Patients  
Recruitment: Recruiting  
Study Results: No results available  
Conditions: Triple negative breast cancer  
Interventions: Procedure: Needle core biopsies|procedure: needle core biopsies of metastatic lesion  
<http://ClinicalTrials.gov/show/NCT01276899>

#### **Study 14**

Title: Vaccine Therapy in Treating Patients With Stage IV Head and Neck Cancer  
Recruitment: Completed  
Study Results: No results available  
Conditions: Head and neck cancer|metastatic cancer  
Interventions: Biological: recombinant fowlpox-TRICOM vaccine  
<http://ClinicalTrials.gov/show/NCT00021424>

## Appendix C: Stage 2-4 Study Selection

### Stage 2

#### Full Article Inclusion/Exclusion Criteria:

1. Is the publication a case report of 1 patient, or only 1 patient has a cutaneous metastases?
  - a. Yes → **STOP**
  - b. No
2. Does the publication contain unique patient data (i.e. not a review, editorial, etc.)?
  - a. Yes
  - b. No → **STOP**
3. Does the publication clearly report on cutaneous metastases?
  - a. Yes
  - b. No → **STOP**
4. Does the publication utilize a local therapeutic intervention for the cutaneous metastases?
  - a. Yes
  - b. No → **STOP**
5. Does the publication clearly describe response criteria of the cutaneous metastases specifically?  
(If the study includes both cutaneous and non-cutaneous metastases and does not distinguish response, then exclude).
  - a. Yes
  - b. No → **STOP**
6. Does the publication have response information in enough detail to assess overall/objective response? For surgically treated patients did they report recurrence information at a minimum?
  - a. Yes
  - b. No → **STOP**

If no reason to **STOP** was met, study will be included in Stage 3.

## Stage 2: Records Excluded and Reason for Exclusion

| <b>Author</b>                                                                                       | <b>Year</b> | <b>Reason for Exclusion<sup>a</sup></b> |
|-----------------------------------------------------------------------------------------------------|-------------|-----------------------------------------|
| <b>F. G. E. Quiroga, M.; Casten, D. F.</b>                                                          | 1966        | Case report of N=1                      |
| <b>I. F. van Erp</b>                                                                                | 1968        | Case report of N=1                      |
| <b>C. K. Chung;A. H. Heffernan</b>                                                                  | 1971        | Case report of N=1                      |
| <b>G. M. W. Bordin, S.</b>                                                                          | 1972        | Case report of N=1                      |
| <b>E. J. Feuerman;M. A. Nir;M. Lurie</b>                                                            | 1973        | Case report of N=1                      |
| <b>M. T. Haqqani;G. Holti</b>                                                                       | 1973        | Case report of N=1                      |
| <b>J. F. Fries;J. A. Lindgren;J. M. Bull</b>                                                        | 1973        | Case report of N=1                      |
| <b>M. J. Mastrangelo;Y. H. Kim;R. S. Bornstein;D. O. Chee;H. L. Sulit;J. W. Yarbrow;R. T. Prehn</b> | 1974        | Case report of N=1                      |
| <b>J. M. Siegel</b>                                                                                 | 1974        | Case report of N=1                      |
| <b>P. MacWilliams;R. O. Noojin</b>                                                                  | 1974        | Case report of N=1                      |
|                                                                                                     | 1974        | Case report of N=1                      |
| <b>M. Razvi;R. Fifer;B. Berkson</b>                                                                 | 1975        | Case report of N=1                      |
| <b>T. R. Bedi;L. K. Bhutani</b>                                                                     | 1975        | Case report of N=1                      |
| <b>E. Hernandez-Perez;F. A. Cruz</b>                                                                | 1976        | Case report of N=1                      |
| <b>R. M. Auty</b>                                                                                   | 1977        | Case report of N=1                      |
| <b>H. Beck;D. Raahave;P. Boiesen</b>                                                                | 1977        | Case report of N=1                      |
| <b>G. R. Mikhail;L. P. Nims;A. P. Kelly, Jr.;D. M. Ditmars, Jr.;W. R. Eyler</b>                     | 1977        | Case report of N=1                      |
| <b>N. F. Marley;W. M. Marley</b>                                                                    | 1982        | Case report of N=1                      |
| <b>G. D. Schaefer;R. A. Erlandson;C. Urmacher</b>                                                   | 1982        | Case report of N=1                      |
| <b>L. P. Herrera-Ornelas, N.; Mittelman, A.</b>                                                     | 1985        | Case report of N=1                      |
| <b>M. G. E. B. O'Rourke, J. R.</b>                                                                  | 1986        | Case report of N=1                      |
| <b>M. P. Wylde;D. E. Osborn</b>                                                                     | 1988        | Case report of N=1                      |
| <b>V. G. Ruocco, V.; Salvatore, M.; Pignatelli, C.; Molea, G.</b>                                   | 1988        | Case report of N=1                      |
| <b>C. C. Harland;E. M. Saihan</b>                                                                   | 1989        | Case report of N=1                      |
| <b>R. L. Fiorelli;L. H. Finkelstein;J. J. Fernandes</b>                                             | 1989        | Case report of N=1                      |
| <b>M. Gutman;J. M. Klausner;M. Inbar;R. R. Rozin</b>                                                | 1989        | Case report of N=1                      |
| <b>S. M. Leal-Khoury;R. L. Barnhill;H. P. Baden</b>                                                 | 1990        | Case report of N=1                      |
| <b>G. M. Franciolini, G.; Minelli, L.; Mutolo, F.; Franchini, M. A.; Chiodini, S.; Zorzi, F.</b>    | 1990        | Case report of N=1                      |
| <b>G. C. Arcangeli, C.; Colistro, F.; Benassi, M.; Lovisolò, G.; Begnozzi, L.</b>                   | 1991        | Case report of N=1                      |
| <b>L. A. Weber</b>                                                                                  | 1993        | Case report of N=1                      |
| <b>D. S. Enion;M. J. Scott;D. Goulesbrough</b>                                                      | 1993        | Case report of N=1                      |
| <b>F. E. Ruiz de Erenchun, A.; Idoate, M. A.; Quintanilla, E.</b>                                   | 1993        | Case report of N=1                      |
| <b>T. Yamamoto;H. Ohkubo;K. Nishioka</b>                                                            | 1994        | Case report of N=1                      |
| <b>K. Ando;Y. Goto;K. Kato;T. Murase;Y. Matsumoto;M. Ohashi</b>                                     | 1994        | Case report of N=1                      |
| <b>J. E. G. Fitzpatrick, L. E.; Lowe, L.; LeBoit, P. E.; White, W. L.; Little, W. P.</b>            | 1994        | Case report of N=1                      |
| <b>K. S. Fujita, Y.; Fujime, M.; Kitagawa, R.</b>                                                   | 1994        | Case report of N=1                      |
| <b>S. W. Sgouros, A. R.</b>                                                                         | 1994        | Case report of N=1                      |
| <b>D. A. B. Mehregan, M. T.; Mehregan, D. R.</b>                                                    | 1995        | Case report of N=1                      |

|                                                                                                    |      |                    |
|----------------------------------------------------------------------------------------------------|------|--------------------|
| <b>R. G. Norfleet</b>                                                                              | 1995 | Case report of N=1 |
| <b>G. Kostandy;M. Katapadi;V. Pullarkat;G. Manzi;S. Salama;B. Sosler;K. M. Hussain</b>             | 1996 | Case report of N=1 |
| <b>M. G. P. Bowditch, R.; Shorthouse, A. J.</b>                                                    | 1996 | Case report of N=1 |
| <b>G. A. W. McCracken, C. V.; Templeton, S. F.</b>                                                 | 1996 | Case report of N=1 |
| <b>S. K. Taniguchi, K.; Nishikawa, Y.; Hayashi, A.; Hamada, T.</b>                                 | 1996 | Case report of N=1 |
| <b>K. Krishna;M. B. Gharpuray</b>                                                                  | 1997 | Case report of N=1 |
| <b>A. Peracchia;R. Rosati;U. Fumagalli;S. Bona;B. Chella</b>                                       | 1997 | Case report of N=1 |
| <b>P. T. B. Dunn, C. F.</b>                                                                        | 1997 | Case report of N=1 |
| <b>J. N. K. Gade, G.; Hitchcock, M. G.; McMichael, A. J.</b>                                       | 1997 | Case report of N=1 |
| <b>D. Greene;D. Deschler;M. J. Kaplan</b>                                                          | 1998 | Case report of N=1 |
| <b>C. Dudley;L. H. Kircik;R. Bullen;S. Snow;A. Landeck;D. Buchler</b>                              | 1998 | Case report of N=1 |
| <b>H. B. Goker, J. D.</b>                                                                          | 1998 | Case report of N=1 |
| <b>J. J. H. Hoorweg, F. J. M.; Keus, R. B.; Zoetmulder, F. A. N.; Loftus, B. M.</b>                | 1998 | Case report of N=1 |
| <b>J. H. B. Kim, P. M.; Beard, J. S.; Skelton Iii, H. G.</b>                                       | 1998 | Case report of N=1 |
| <b>Y. M. Kubota, L. M.; Nakada, T.; Sasagawa, I.; Suzuki, H.; Aoyama, N.</b>                       | 1998 | Case report of N=1 |
| <b>J. E. Vaquerano;P. Cadbury;P. Treseler;R. Sagebiel;S. P. Leong</b>                              | 1999 | Case report of N=1 |
| <b>P. C. Seline;D. J. Jaskierny</b>                                                                | 1999 | Case report of N=1 |
| <b>A. S. Makdessian;J. G. Heathcote;H. B. Lampe</b>                                                | 1999 | Case report of N=1 |
| <b>K. S. Dekker;P. J. van der Linden;M. C. Stenfert Kroese;N. Hofstee</b>                          | 1999 | Case report of N=1 |
| <b>D. De Argila;J. C. Bureo;F. L. Marquez;J. J. Pimentel</b>                                       | 1999 | Case report of N=1 |
| <b>J. R. P. Kouvaris, G. A.; Sykiotis, C. A.; Dapolla, V. J.; Vlahos, L. J.</b>                    | 1999 | Case report of N=1 |
| <b>M. M. Nakamura, Y.</b>                                                                          | 1999 | Case report of N=1 |
| <b>A. H. S. Ozakyol, T.; Pasaoglu, O.</b>                                                          | 1999 | Case report of N=1 |
| <b>A. K. P. Sharma, N. D.; Vandal, M. T.; Bryan, R.</b>                                            | 1999 | Case report of N=1 |
| <b>J. Gehl;P. F. Geertsen</b>                                                                      | 2000 | Case report of N=1 |
| <b>E. H.-H. Peretz, D.; Yanai-Inbar, I.; Halevy, S.</b>                                            | 2000 | Case report of N=1 |
| <b>S. B.-E. Serrano-Ortega, A.; Ortega del Olmo, R. M.; Linares Solano, J.</b>                     | 2000 | Case report of N=1 |
| <b>A. F. Steinmann, J. O.; Schuler, G.; Von den Driesch, P.</b>                                    | 2000 | Case report of N=1 |
| <b>K. Peris;M. C. Fargnoli;F. Lunghi;S. Chimenti</b>                                               | 2001 | Case report of N=1 |
| <b>E. J. Giesler;J. R. Gee;G. P. Reece;C. A. Pettaway;R. E. Pollock;L. L. Pisters</b>              | 2001 | Case report of N=1 |
| <b>A. Simsir;O. B. Ioffe;M. Henry</b>                                                              | 2001 | Case report of N=1 |
| <b>C. S. Johnson;F. A. Ramos-Caro;A. M. Hassanein</b>                                              | 2001 | Case report of N=1 |
| <b>V. T. Ambrogi, G.; Mineo, T. C.</b>                                                             | 2001 | Case report of N=1 |
| <b>H. P. Bahia, A.; Baguley, P.; Ramakrishnan, V.</b>                                              | 2001 | Case report of N=1 |
| <b>S. W. Dueland, E.; Loberg, M.; Iversen, J. R.</b>                                               | 2001 | Case report of N=1 |
| <b>S. A. P. Holme, N. J.; Mills, C. M.</b>                                                         | 2001 | Case report of N=1 |
| <b>K. J. W. Smith, J.; Skelton, H.</b>                                                             | 2001 | Case report of N=1 |
| <b>R. L. J. M. van Ruyven, C. M.; Dinjens, W. N. M.; van den Bosch, W. A.; Paridaens, A. D. A.</b> | 2001 | Case report of N=1 |
| <b>N. C. S. Zeitouni, S.; Oseroff, A. R.</b>                                                       | 2001 | Case report of N=1 |
| <b>T. Gunes;M. Akcakus</b>                                                                         | 2002 | Case report of N=1 |
| <b>S. Ugurel;A. Wagner;C. Pfohler;W. Tilgen;U.</b>                                                 | 2002 | Case report of N=1 |

| <b>Reinhold</b>                                                                             |      |                    |
|---------------------------------------------------------------------------------------------|------|--------------------|
| <b>J. T. Lin;W. H. Wang;C. C. Yen;I. T. Yu;P. M. Chen</b>                                   | 2002 | Case report of N=1 |
| <b>S. Boughattas;H. Hassine;K. Chatti;R. Jomaa;H. Essabbah</b>                              | 2002 | Case report of N=1 |
| <b>D. F. Calista, C.; Landi, G.</b>                                                         | 2002 | Case report of N=1 |
| <b>C. H. S. Chau, W. T.; Li, M. K. W.</b>                                                   | 2002 | Case report of N=1 |
| <b>E. K. Kaytan, A.; Alici, S.; Fayda, M.; Kizir, A.</b>                                    | 2002 | Case report of N=1 |
| <b>S. J. Vaidya, K. P.; Fisher, C.</b>                                                      | 2002 | Case report of N=1 |
| <b>M. S. Jee;Y. I. Chung;M. W. Lee;J. H. Choi;K. C. Moon;J. K. Koh</b>                      | 2003 | Case report of N=1 |
| <b>P. Vereecken;A. Mathieu;M. Laporte;M. Petein;T. Velu;A. Awada;M. Heenen</b>              | 2003 | Case report of N=1 |
| <b>S. S. Daneshmand, A. I.; Skinner, E. C.</b>                                              | 2003 | Case report of N=1 |
| <b>H. S. Hayashi, T.; Shimizu, H.</b>                                                       | 2003 | Case report of N=1 |
| <b>Y. N. Ikeda, M.; Kurihara, H.; Kodaira, S.</b>                                           | 2003 | Case report of N=1 |
| <b>A. J. T. Koupparis, A.; Brown, M.; Wright, M.</b>                                        | 2003 | Case report of N=1 |
| <b>G. D. Z. Leonard, S. H.; Dahut, W.</b>                                                   | 2003 | Case report of N=1 |
| <b>N. Levine</b>                                                                            | 2003 | Case report of N=1 |
| <b>C. M. M. Stonard, S.</b>                                                                 | 2003 | Case report of N=1 |
| <b>B. W. LeSueur;R. J. Abraham;D. J. DiCaudo;W. J. O'Connor</b>                             | 2004 | Case report of N=1 |
| <b>S. G. Prabhudesai;C. S. Pramesh;N. A. Jambhekar;K. A. Pathak;V. D. Sanghvi</b>           | 2004 | Case report of N=1 |
| <b>C. K. Gurer;A. Karaduman;G. Bukulmez;S. Sahin;O. Ozkaya;I. Erkan</b>                     | 2004 | Case report of N=1 |
| <b>R. S. Allan</b>                                                                          | 2004 | Case report of N=1 |
| <b>M. J. A. Garcia-F-Villalta, M.; Dauden, E.; Fraga, J.; Garcia-Diez, A.</b>               | 2004 | Case report of N=1 |
| <b>R. F. Osborne</b>                                                                        | 2004 | Case report of N=1 |
| <b>A. J. G. Sainz, L.</b>                                                                   | 2004 | Case report of N=1 |
| <b>U. Trefzer;W. Sterry</b>                                                                 | 2005 | Case report of N=1 |
| <b>K. Prabhash;V. Talwar;A. K. Vaid;D. C. Doval</b>                                         | 2005 | Case report of N=1 |
| <b>S. A. Al-Ani;C. Hernon;A. T. Sillitoe;P. A. Burgess;P. R. Stanley</b>                    | 2005 | Case report of N=1 |
| <b>B. Ragnarsson-Olding;E. Djureen-Martensson;E. Mansson-Brahme;J. Hansson</b>              | 2005 | Case report of N=1 |
| <b>M. F. Acikalın;E. Vardareli;N. Tel;T. Sarıcam;S. Urer</b>                                | 2005 | Case report of N=1 |
|                                                                                             | 2005 | Case report of N=1 |
| <b>O. B. Dereure, V.; Guillot, B.</b>                                                       | 2005 | Case report of N=1 |
| <b>S. R. Karmali, L.; Temple, W.; Falck, V.; McKinnon, G.</b>                               | 2005 | Case report of N=1 |
| <b>C. A. A. Woodruff, M.; Hsu, S.</b>                                                       | 2005 | Case report of N=1 |
| <b>N. C. D. Zeitouni, K.; Cheney, R. T.</b>                                                 | 2005 | Case report of N=1 |
| <b>M. E. Laing;F. J. Moloney;E. W. Kay;P. Conlon;G. M. Murphy</b>                           | 2006 | Case report of N=1 |
| <b>I. Miyoshi;T. Saito;K. Bandobashi;H. Kodama;Y. Ohtsuki;H. Taguchi</b>                    | 2006 | Case report of N=1 |
| <b>A. O. Ardavanis, G.; Ioannidis, G.; Rigatos, G.</b>                                      | 2006 | Case report of N=1 |
| <b>M. Y.-C. Caloglu, V.; Kocak, Z.; Uzal, C.</b>                                            | 2006 | Case report of N=1 |
| <b>M. G. Capezzone, P.; De Sanctis, D.; Bellitti, P.; Vena, P.; Morabito, E.; Bruno, R.</b> | 2006 | Case report of N=1 |
| <b>M. T. Hamada, S.; Duan, H.; Furue, M.</b>                                                | 2006 | Case report of N=1 |
| <b>R. P. K. Hanson, B.</b>                                                                  | 2006 | Case report of N=1 |
| <b>T. T. Kamisawa, M.; Nakajima, H.; Egawa, N.</b>                                          | 2006 | Case report of N=1 |
| <b>K. Z. Kondras, A.; Janowski, P.; Kordek, R.</b>                                          | 2006 | Case report of N=1 |



|                                                                                                                                                                                                                                                                                                         |      |                    |
|---------------------------------------------------------------------------------------------------------------------------------------------------------------------------------------------------------------------------------------------------------------------------------------------------------|------|--------------------|
| A. G. Maiorana, F.; Cesinaro, A. M.; Conti, A.; Rossi, G.                                                                                                                                                                                                                                               | 2006 | Case report of N=1 |
| B. E. Opper, P.; Ziemer, M.                                                                                                                                                                                                                                                                             | 2006 | Case report of N=1 |
| H. O. Ozcanli, F.; Aydin, A. T.                                                                                                                                                                                                                                                                         | 2006 | Case report of N=1 |
| L. B. Stingeni, V.                                                                                                                                                                                                                                                                                      | 2006 | Case report of N=1 |
| D. P. Torchia, G. M.; Terranova, M.; Antiga, E.; Melani, L.; Caproni, M.; Fabbri, P.                                                                                                                                                                                                                    | 2006 | Case report of N=1 |
| E. M. K. Zwenzner, M.; Ziemer, M.                                                                                                                                                                                                                                                                       | 2006 | Case report of N=1 |
| J. K. Avery                                                                                                                                                                                                                                                                                             | 2007 | Case report of N=1 |
| T. Vandergriff; R. A. Krathen; I. Orengo                                                                                                                                                                                                                                                                | 2007 | Case report of N=1 |
| R. Sachdev; S. Jain                                                                                                                                                                                                                                                                                     | 2007 | Case report of N=1 |
| M. Snoj; M. Cemazar; B. Slekovec Kolar; G. Sersa                                                                                                                                                                                                                                                        | 2007 | Case report of N=1 |
| G. Barreto; S. Shrikhande; P. Shukla                                                                                                                                                                                                                                                                    | 2007 | Case report of N=1 |
| C. Bailey; A. Broadbent                                                                                                                                                                                                                                                                                 | 2007 | Case report of N=1 |
| J. V. R. Gutierrez, M. A.                                                                                                                                                                                                                                                                               | 2007 | Case report of N=1 |
| M. M. Kaibori, M.; Tagami, S.; Uchida, Y.; Tanaka, H.; Yoshioka, K.; Takahashi, Y.; Sakaida, N.; Uemura, Y.; Seki, T.; Okazaki, K.; Kamiyama, Y.                                                                                                                                                        | 2007 | Case report of N=1 |
| H. C. C. Lee, C. Y.; Hsiao, C. H.                                                                                                                                                                                                                                                                       | 2007 | Case report of N=1 |
| R. T. Longo, F.; Castellana, M.; Amici, S.; Veri, A.; Cacciamani, F.; Gasparini, G.; Lanzi, G.                                                                                                                                                                                                          | 2007 | Case report of N=1 |
| I. H. K. Wolf, K.; Cerroni, L.; Kerl, H.                                                                                                                                                                                                                                                                | 2007 | Case report of N=1 |
| D. M. Cannon; N. Y. Lee                                                                                                                                                                                                                                                                                 | 2008 | Case report of N=1 |
| K. Yasuda; H. Kayashima; K. Sanefuji; K. Tahara; S. Tsutsui; H. Higashi; S. Kitano                                                                                                                                                                                                                      | 2008 | Case report of N=1 |
| V. S. De Giorgi, S.; Massi, D.; Panelos, J.; Grazzini, M.; Lotti, T.                                                                                                                                                                                                                                    | 2008 | Case report of N=1 |
| M. J. J. H. Kim, S.; Holodny, A. I.                                                                                                                                                                                                                                                                     | 2008 | Case report of N=1 |
| A. Y. Ohnishi, Y.; Hayashi, K.; Yamamoto, O.                                                                                                                                                                                                                                                            | 2008 | Case report of N=1 |
| S. Y. Shimizu, C.; Minauchi, K.; Tsuchiya, K.                                                                                                                                                                                                                                                           | 2008 | Case report of N=1 |
| W. J. Lee; S. M. Kang; C. H. Won; S. E. Chang; M. W. Lee; J. H. Choi; K. C. Moon                                                                                                                                                                                                                        | 2009 | Case report of N=1 |
| M. Y. Park; Y. C. Kim                                                                                                                                                                                                                                                                                   | 2009 | Case report of N=1 |
| H. Yamashita; K. Okuma; K. Nakagawa                                                                                                                                                                                                                                                                     | 2009 | Case report of N=1 |
| W. T. Ho; L. M. Lee; C. L. Chen; J. T. Tseng; T. H. Tsai                                                                                                                                                                                                                                                | 2009 | Case report of N=1 |
| W. J. Lee; D. W. Lee; M. W. Lee; J. H. Choi; K. C. Moon; J. K. Koh                                                                                                                                                                                                                                      | 2009 | Case report of N=1 |
| K. B. C. Conner, P. R.                                                                                                                                                                                                                                                                                  | 2009 | Case report of N=1 |
| J. S. Lehmann, H.; Albers, P.; Volkmer, B.; Gschwend, J. E.; Fechner, G.; Spahn, M.; Heidenreich, A.; Odenthal, A.; Seif, C.; Nurnberg, N.; Wulffing, C.; Greb, C.; Kalble, T.; Grimm, M. O.; Fieseler, C. F.; Krege, S.; Retz, M.; Schulte-Baukloh, H.; Gerber, M.; Hack, M.; Kamradt, J.; Stockle, M. | 2009 | Case report of N=1 |
| S. O. Rueben, D.; Lee, P.; Weiss, A.                                                                                                                                                                                                                                                                    | 2009 | Case report of N=1 |
| R. T. Senetta, E.; Rudi, R.; Benech, F.; Soffietti, R.; Cassoni, P.                                                                                                                                                                                                                                     | 2009 | Case report of N=1 |
| C. K. Stergiopoulos, J.; Kapetanakis, N.; Katsinelos, P.; Kokkali, S.; Tsapournas, G.; Zавos, C.; Zaramboukas, T.                                                                                                                                                                                       | 2009 | Case report of N=1 |
| K. Turza; L. T. Dengel; R. C. Harris; J. W. Patterson; K. White; W. W. Grosh; C. L. Slingluff, Jr.                                                                                                                                                                                                      | 2010 | Case report of N=1 |
| K. C. Kaehler; F. Egberts; A. Hauschild                                                                                                                                                                                                                                                                 | 2010 | Case report of N=1 |
| S. E. Cotter; P. M. Devlin; D. Sahni; J. L. Hansen; D. A. O'Farrell; A. K. Ng; L. C. Wang                                                                                                                                                                                                               | 2010 | Case report of N=1 |

|                                                                                                                                              |      |                                       |
|----------------------------------------------------------------------------------------------------------------------------------------------|------|---------------------------------------|
| <b>D. Deka;N. Gupta;A. Bahadur;V. Dadhwal;S. Mittal</b>                                                                                      | 2010 | Case report of N=1                    |
| <b>G. Augustin;T. Kekez;B. Bogdanic</b>                                                                                                      | 2010 | Case report of N=1                    |
| <b>S. A. St Pierre;J. Rommel;A. Ciurea;D. Fife;S. S. Yoo;M. Martini;T. M. Kuzel;J. Wayne;A. Rademaker;D. P. West;M. Alam</b>                 | 2010 | Case report of N=1                    |
| <b>C. Arslan;D. S. Dede;O. Dizdar;K. Altundag</b>                                                                                            | 2010 | Case report of N=1                    |
| <b>R. Fumerton;T. Affi;M. Martinka;G. de Gannes</b>                                                                                          | 2010 | Case report of N=1                    |
| <b>B. A. AbdullGaffar, A.; Al-Marzooqi, F.</b>                                                                                               | 2010 | Case report of N=1                    |
| <b>I. T. Dimitroulis, K.; Zarbis, G.; Dimakou, K.; Toumbis, M.</b>                                                                           | 2010 | Case report of N=1                    |
| <b>S. D. Larsen, D. M. R.; Comfere, N. I.; Folpe, A. L.; Sciallis, G. F.</b>                                                                 | 2010 | Case report of N=1                    |
| <b>S. A. R. St. Pierre, J.; Ciurea, A.; Fife, D.; Yoo, S. S.; Martini, M.; Kuzel, T. M.; Wayne, J.; Rademaker, A.; West, D. P.; Alam, M.</b> | 2010 | Case report of N=1                    |
| <b>M. B. Vaccaro, F.; Barbuzza, O.; Gangemi, S.; Guarneri, B.</b>                                                                            | 2010 | Case report of N=1                    |
| <b>M. Lopes;C. B. Barcaui;A. N. Vilar</b>                                                                                                    | 2011 | Case report of N=1                    |
| <b>Z. Ismaili;S. Dekhay;A. Moussaoui;A. Jahid</b>                                                                                            | 2011 | Case report of N=1                    |
| <b>D. L. S. Damian, R. P. M.</b>                                                                                                             | 2011 | Case report of N=1                    |
| <b>M. A. Fesler, C.; Gonzalez, J.; Geary, B.; Chehval, M.; Richart, J.</b>                                                                   | 2011 | Case report of N=1                    |
| <b>J. R. S. Reddy, R.; Singh, R. K.; Pottakkat, B.; Prakash, A.; Behari, A.; Gupta, A. K.; Kapoor, V. K.</b>                                 | 2011 | Case report of N=1                    |
| <b>T. Terada</b>                                                                                                                             | 2011 | Case report of N=1                    |
| <b>S. Shenoy</b>                                                                                                                             | 2012 | Case report of N=1                    |
| <b>N. Mozzillo;C. Caraco;S. Mori;G. Di Monta;G. Botti;P. A. Ascierito;C. Caraco;L. Aloj</b>                                                  | 2012 | Case report of N=1                    |
| <b>M. R. Young;K. Millington;L. E. Clarke;K. Helm</b>                                                                                        | 2012 | Case report of N=1                    |
| <b>J. L. Syrios, M.; Tountas, H.; Grivas, A.; Lianos, E.; Athanasiou, A. E.</b>                                                              | 2012 | Case report of N=1                    |
| <b>S. B. Chaudhary, C.; Husain, A.</b>                                                                                                       | 2013 | Case report of N=1                    |
| <b>W. T. Murphy</b>                                                                                                                          | 1969 | Lack of adequate response information |
| <b>A. Sato;O. Maie;T. Kato</b>                                                                                                               | 1973 | Lack of adequate response information |
| <b>P. B. McCulloch;P. B. Dent;M. Blajchman;W. M. Muirhead;R. A. Price</b>                                                                    | 1977 | Lack of adequate response information |
| <b>T. T. Pitt</b>                                                                                                                            | 1977 | Lack of adequate response information |
| <b>M. M. Kligerman;A. Smith;J. M. Yugas;S. Wilson;C. J. Sternhagen;J. A. Helland;J. M. Sala</b>                                              | 1977 | Lack of adequate response information |
| <b>J. D. Everall;P. M. Dowd</b>                                                                                                              | 1977 | Lack of adequate response information |
| <b>S. Nieminen;T. Hietanen;E. Nordman</b>                                                                                                    | 1979 | Lack of adequate response information |
| <b>P. W. Chambers;C. P. Schwinn</b>                                                                                                          | 1979 | Lack of adequate response information |
| <b>U. Wertheim;L. Ozzello</b>                                                                                                                | 1980 | Lack of adequate response information |
| <b>F. J. Paradinas;B. M. Southcott;D. O'Connell;F. den Hollander;A. H. Schuurs;M. S. Pulley;D. C. Dumonde</b>                                | 1982 | Lack of adequate response information |
| <b>A. N. Ashizawa, A.; Maeda, H.</b>                                                                                                         | 1982 | Lack of adequate response information |
| <b>F. J. S. Paradinas, B. M.; O'Connell, D.</b>                                                                                              | 1982 | Lack of adequate response information |
| <b>M. W. C. Berns, J.; Wile, A. G.</b>                                                                                                       | 1984 | Lack of adequate response information |
| <b>A. T. Sarig, E.; Kaplan, I.; Ben Bassat, M.</b>                                                                                           | 1984 | Lack of adequate response information |
| <b>L. Goldman;R. O. Gregory;M. La Plant</b>                                                                                                  | 1985 | Lack of adequate response information |
| <b>N. G. Ordonez;N. A. Samaan</b>                                                                                                            | 1987 | Lack of adequate response information |
| <b>R. Salmi;P. Holsti</b>                                                                                                                    | 1987 | Lack of adequate response information |
| <b>T. Naruse;A. Koike;A. Miyashita;K. Matsumoto;K. Suzumura;T. Kanemitsu;K. Kato;S. Yamamoto</b>                                             | 1987 | Lack of adequate response information |
| <b>S. E. Singletary;S. L. Tucker;A. W. Boddie, Jr.</b>                                                                                       | 1988 | Lack of adequate response information |

|                                                                                                                                                                                    |      |                                       |
|------------------------------------------------------------------------------------------------------------------------------------------------------------------------------------|------|---------------------------------------|
| <b>L. V. L. Requena Caballero, F.; Requena Caballero, C.; Hernando, S. U.; Sanchez Lopez, M.; Sanchez Yus, E.; Hernandez Moro, B.</b>                                              | 1988 | Lack of adequate response information |
| <b>S. Ozawa;N. Ando;Y. Shinozawa;T. Ohmori;K. Kase;T. Sato;O. Abe</b>                                                                                                              | 1989 | Lack of adequate response information |
| <b>C. O. Asagami, T.; Ogasawara, M.; Nakano, J.; Imamura, T.; Hamanaka, S.; Tai, T.; Irie, R.</b>                                                                                  | 1989 | Lack of adequate response information |
| <b>M. K. T. Heatley, P. G.</b>                                                                                                                                                     | 1989 | Lack of adequate response information |
| <b>L. M. Coslett;M. R. Katlic</b>                                                                                                                                                  | 1990 | Lack of adequate response information |
| <b>M. M. Rifai, H.; Bassiouni, M.</b>                                                                                                                                              | 1990 | Lack of adequate response information |
| <b>V. S. Schneider, B.</b>                                                                                                                                                         | 1990 | Lack of adequate response information |
| <b>R. A. Waters;R. M. Clement;J. M. Thomas</b>                                                                                                                                     | 1991 | Lack of adequate response information |
| <b>L. R. Williams;L. J. Levine;Y. C. Kauh</b>                                                                                                                                      | 1991 | Lack of adequate response information |
| <b>O. C. Merimsky, S.; Inbar, M.</b>                                                                                                                                               | 1991 | Lack of adequate response information |
| <b>M. W. Tronnier, M.; Wolff, H. H.</b>                                                                                                                                            | 1991 | Lack of adequate response information |
| <b>D. A. K. Martinez, D. R.; Ginn-Pease, M. E.; Haase, G. M.; Wiener, E. S.</b>                                                                                                    | 1992 | Lack of adequate response information |
| <b>A. S. R. Pakula, J. K.</b>                                                                                                                                                      | 1992 | Lack of adequate response information |
| <b>R. M. P. Sherry, H. I.; Rosenberg, S. A.; Yang, J. C.</b>                                                                                                                       | 1992 | Lack of adequate response information |
| <b>S. Hill;J. M. Thomas</b>                                                                                                                                                        | 1993 | Lack of adequate response information |
| <b>M. Imachi;N. Tsukamoto;S. Kinoshita;H. Nakano</b>                                                                                                                               | 1993 | Lack of adequate response information |
| <b>P. Wolf;E. Rieger;H. Kerl</b>                                                                                                                                                   | 1993 | Lack of adequate response information |
| <b>V. A. Z. Buchenkov, V. K.; Serebryakov, V. A.; Kozlov, A. P.; Moskalik, K. G.</b>                                                                                               | 1994 | Lack of adequate response information |
| <b>S. N. S. Snow, W.; Lo, J. S.; Mohs, F. E.; Warner, T.; Dekkinga, J. A.; Feyzi, J.</b>                                                                                           | 1994 | Lack of adequate response information |
| <b>W. W. Ten Bokkel Huinink</b>                                                                                                                                                    | 1994 | Lack of adequate response information |
| <b>M. K. Lingam;A. J. McKay</b>                                                                                                                                                    | 1995 | Lack of adequate response information |
| <b>H. K. M. Lingam, A. J.</b>                                                                                                                                                      | 1995 | Lack of adequate response information |
| <b>S. Hill;J. M. Thomas</b>                                                                                                                                                        | 1996 | Lack of adequate response information |
| <b>P. Fritz;F. W. Hensley;C. Berns;P. Schraube;M. Wannenmacher</b>                                                                                                                 | 1996 | Lack of adequate response information |
| <b>A. Boscaino;P. Orabona;A. D'Antonio;S. Staibano;G. De Rosa</b>                                                                                                                  | 1996 | Lack of adequate response information |
| <b>L. Y. Requena, E. S.; Nunez, C.; White Jr, C. R.; Sanguenza, O. P.</b>                                                                                                          | 1996 | Lack of adequate response information |
| <b>L. J. Strobbe;O. E. Nieweg;B. B. Kroon</b>                                                                                                                                      | 1997 | Lack of adequate response information |
| <b>A. Peracchia;R. Rosati;U. Fumagalli;S. Bona;B. Chella</b>                                                                                                                       | 1997 | Lack of adequate response information |
| <b>P. R. B. Dahl, D. G.; Goellner, J. R.; Hay, I. D.</b>                                                                                                                           | 1997 | Lack of adequate response information |
| <b>M. L. L. Nasi, P.; Busam, K. J.; Prieto, V.; Panageas, K. S.; Lewis, J. J.; Houghton, A. N.; Chapman, P. B.</b>                                                                 | 1999 | Lack of adequate response information |
| <b>L. N. H. Dorairajan, A. K.; Aron, M.; Rajeev, T. P.; Nair, M.; Seth, A.; Dogra, P. N.; Gupta, N. P.</b>                                                                         | 1999 | Lack of adequate response information |
| <b>C. M. C. Hager, P. R.</b>                                                                                                                                                       | 1999 | Lack of adequate response information |
| <b>O. S. H. Taskin Yucel, A.; Onerci, M.; Sokmensuer, C.</b>                                                                                                                       | 1999 | Lack of adequate response information |
| <b>P. Fritz;F. W. Hensley;C. Berns;W. Harms;M. Wannenmacher</b>                                                                                                                    | 2000 | Lack of adequate response information |
| <b>S. Kurul</b>                                                                                                                                                                    | 2000 | Lack of adequate response information |
| <b>S. K. Faderl, H. M.; Estey, E.; Manshouri, T.; Chan, C. Y.; Elsaied, A. R.; Kornblau, S. M.; Cortes, J.; Thomas, D. A.; Pierce, S.; Keating, M. J.; Estrov, Z.; Albitar, M.</b> | 2000 | Lack of adequate response information |
| <b>S. D. R. Stavrianos, M.; McLean, N. R.; Kelly, C. G.; Soames, J. V.</b>                                                                                                         | 2000 | Lack of adequate response information |

|                                                                                                                                                                           |      |                                       |
|---------------------------------------------------------------------------------------------------------------------------------------------------------------------------|------|---------------------------------------|
| <b>P. R. Cohen</b>                                                                                                                                                        | 2001 | Lack of adequate response information |
| <b>V. Ambroggi;I. Nofroni;G. Tonini;T. C. Mineo</b>                                                                                                                       | 2001 | Lack of adequate response information |
| <b>P. S. Wyss, V.; Dobler-Girdziunaite, D.; Hornung, R.; Walt, H.; Degen, A.; Fehr, M.</b>                                                                                | 2001 | Lack of adequate response information |
| <b>C. A. H. Rodriguez-Galindo, D.; Onyekwere, O.; Pin, N.; Rao, B. N.; Hoffer, F. A.; Kun, L. E.; Pappo, A. S.; Santana, V. M.</b>                                        | 2001 | Lack of adequate response information |
| <b>J. M. Zuetenhorst;M. L. van Velthuysen;E. J. Rutgers;H. Boot;B. C. Taal</b>                                                                                            | 2002 | Lack of adequate response information |
| <b>D. Danic;A. Danic</b>                                                                                                                                                  | 2003 | Lack of adequate response information |
| <b>A. S. Jatoi, V. J.; Schaefer, P.; Block, M.; Loprinzi, C.; Roche, P.; Garneau, S.; Morton, R.; Stella, P. J.; Alberts, S. R.; Pittelkow, M.; Sloan, J.; Pagano, R.</b> | 2003 | Lack of adequate response information |
| <b>C. I. Lu;W. R. Wong;H. S. Hong</b>                                                                                                                                     | 2004 | Lack of adequate response information |
| <b>J. A. Carucci;J. C. Martinez;N. C. Zeitouni;L. Christenson;B. Coldiron;S. Zweibel;C. C. Otley</b>                                                                      | 2004 | Lack of adequate response information |
| <b>E. Copcu;E. Dikicioglu;N. Sivrioglu;I. Meteoglu</b>                                                                                                                    | 2004 | Lack of adequate response information |
| <b>N. M. Luk;K. H. Yu;C. L. Choi;W. K. Yeung</b>                                                                                                                          | 2004 | Lack of adequate response information |
| <b>M. P. Schon;B. G. Wienrich;C. Drewniok;A. B. Bong;J. Eberle;C. C. Geilen;H. Gollnick;M. Schon</b>                                                                      | 2004 | Lack of adequate response information |
| <b>U. G. Wollina, T.; Konrad, H.; Schonlebe, J.; Koch, A.; Hansel, G.; Haroske, G.; Kostler, E.</b>                                                                       | 2004 | Lack of adequate response information |
| <b>D. T. Alexandrescu;J. Vaillant;L. J. Yahr;P. Kelemen;P. H. Wiernik</b>                                                                                                 | 2005 | Lack of adequate response information |
| <b>J. Wenzel;M. Uerlich;O. Haller;T. Bieber;T. Tueting</b>                                                                                                                | 2005 | Lack of adequate response information |
| <b>D. Dequanter;F. B. Mboti;P. Lothaire;G. Andry</b>                                                                                                                      | 2005 | Lack of adequate response information |
| <b>T. R. Quinn;L. M. Duncan;A. Zembowicz;W. C. Faquin</b>                                                                                                                 | 2005 | Lack of adequate response information |
| <b>E. L. Richtig, R.; Kerl, H.; Smolle, J.</b>                                                                                                                            | 2005 | Lack of adequate response information |
| <b>C. M. Coco, A.; Verbo, A.; D'Alba, P.; Pierconti, F.; De Gaetano, A. M.; Pedretti, G.; Petito, L.; Rizzo, G.; Masi, A.; Picciocchi, A.</b>                             | 2005 | Lack of adequate response information |
| <b>H. S. Nakamura, T.; Kodama, K.; Shimizu, H.</b>                                                                                                                        | 2005 | Lack of adequate response information |
| <b>P. T. K. Ting, R.; Arlette, J. P.</b>                                                                                                                                  | 2005 | Lack of adequate response information |
| <b>R. P. Hanson;B. Kneafsey;D. Royston</b>                                                                                                                                | 2006 | Lack of adequate response information |
| <b>K. Y. H. Tan, K. S.; Lai, J. H.; Lim, J. F.; Ooi, B. S.; Tang, C. L.; Eu, K. W.</b>                                                                                    | 2006 | Lack of adequate response information |
| <b>S. D. F. West, T.; Davies, R. J. O.</b>                                                                                                                                | 2006 | Lack of adequate response information |
| <b>L. M. Gazoni;T. L. Hedrick;P. W. Smith;C. M. Friel;B. R. Swenson;J. D. Adams;T. C. Lisle;E. F. Foley;E. J. Ledesma</b>                                                 | 2008 | Lack of adequate response information |
| <b>W. Walther;R. Siegel;D. Kobelt;T. Knosel;M. Dietel;A. Bembenek;J. Aumann;M. Schleef;R. Baier;U. Stein;P. M. Schlag</b>                                                 | 2008 | Lack of adequate response information |
| <b>G. T. Langille, S. M.; Bullock, M. J.</b>                                                                                                                              | 2008 | Lack of adequate response information |
| <b>W. L. Wang;J. L. Hornick;R. Mallipeddi;B. G. Zelger;J. D. Rother;D. Yang;D. C. Lev;J. C. Trent;V. G. Prieto;T. Brenn;A. Robson;E. Calonje;A. J. Lazar</b>              | 2009 | Lack of adequate response information |
| <b>C. Y. Atalay, K. B.</b>                                                                                                                                                | 2009 | Lack of adequate response information |
| <b>D. L. Damian</b>                                                                                                                                                       | 2010 | Lack of adequate response information |
| <b>M. T. Kakimoto, H.; Okamura, T.; Yoshino, K.</b>                                                                                                                       | 2010 | Lack of adequate response information |
| <b>F. A. Smithers;Z. Moaveni;C. De Groot</b>                                                                                                                              | 2011 | Lack of adequate response information |
| <b>L. G. V. Campana, S.; Chiarion-Sileni, V.; Rossi, C. R.</b>                                                                                                            | 2011 | Lack of adequate response information |
| <b>A. K. Shah</b>                                                                                                                                                         | 2011 | Lack of adequate response information |

|                                                                                                                                 |      |                                       |
|---------------------------------------------------------------------------------------------------------------------------------|------|---------------------------------------|
| <b>L. K. Chan;A. A. Quaba</b>                                                                                                   | 2012 | Lack of adequate response information |
| <b>T. Terada</b>                                                                                                                | 2012 | Lack of adequate response information |
| <b>E. P. Stranadko</b>                                                                                                          | 2012 | Lack of adequate response information |
| <b>P. R. P. Cohen, V. G.; Piha-Paul, S. A.; Kurzrock, R.</b>                                                                    | 2012 | Lack of adequate response information |
| <b>P. A. Mordant, A.; De Dominicis, F.; Pricopi, C.; Foucault, C.; Dujon, A.; Le Pimpec-Barthes, F.; Riquet, M.</b>             | 2012 | Lack of adequate response information |
| <b>G. S. Gerlini, S.; Di Gennaro, P.; Urso, C.; Pimpinelli, N.; Borgognoni, L.</b>                                              | 2013 | Lack of adequate response information |
| <b>A. M. A. Sesterhenn, M. B.; Timmesfeld, N.; Werner, J. A.; Wiegand, S.</b>                                                   | 2013 | Lack of adequate response information |
| <b>N. A. Spierings, V.</b>                                                                                                      | 2013 | Lack of adequate response information |
| <b>W. L. Miller</b>                                                                                                             | 1967 | No cutaneous metastases               |
| <b>F. J. Carapeto;A. Garcia-Perez</b>                                                                                           | 1972 | No cutaneous metastases               |
| <b>W. N. Thornton, Jr.;W. C. Flanagan, Jr.</b>                                                                                  | 1973 | No cutaneous metastases               |
| <b>R. D. Ryall;I. W. Hanham;K. A. Newton;K. Hellmann;D. M. Brinkley;O. K. Hjertaas</b>                                          | 1974 | No cutaneous metastases               |
| <b>W. B. Reed;J. College, Jr.;M. J. Francis;H. Zachariae;F. Mohs;M. A. Sher;I. B. Sneddon</b>                                   | 1974 | No cutaneous metastases               |
| <b>B. Cady;M. A. Legg;A. B. Redfern</b>                                                                                         | 1975 | No cutaneous metastases               |
| <b>S. C. Lee;L. M. Roth;C. Ehrlich;J. A. Hall</b>                                                                               | 1977 | No cutaneous metastases               |
| <b>P. H. Kravitz;C. J. McDonald</b>                                                                                             | 1978 | No cutaneous metastases               |
| <b>P. Krokowicz</b>                                                                                                             | 1979 | No cutaneous metastases               |
| <b>R. M. Byers</b>                                                                                                              | 1979 | No cutaneous metastases               |
| <b>M. M. Kligerman;J. M. Sala;A. R. Smith;E. A. Knapp;H. Tsujii;M. A. Bagshaw;S. Wilson</b>                                     | 1980 | No cutaneous metastases               |
| <b>H. W. Randle;P. M. Banks;R. K. Winkelmann</b>                                                                                | 1980 | No cutaneous metastases               |
| <b>J. R. Castro;J. M. Quivey;J. T. Lyman;G. T. Chen;T. L. Phillips;C. A. Tobias;E. L. Alpen</b>                                 | 1980 | No cutaneous metastases               |
| <b>M. Southard;C. I. Turalba;C. M. Mansfield;S. Kramer;R. L. White</b>                                                          | 1982 | No cutaneous metastases               |
| <b>R. Sacre;F. J. Lejeune</b>                                                                                                   | 1982 | No cutaneous metastases               |
| <b>E. Frokiaer;J. Kiil;H. Sogaard</b>                                                                                           | 1982 | No cutaneous metastases               |
| <b>L. H. Barr;J. W. Menard</b>                                                                                                  | 1983 | No cutaneous metastases               |
| <b>D. E. Elder;D. th Guerry;R. M. Heiberger;D. LaRossa;L. I. Goldman;W. H. Clark, Jr.;C. J. Thompson;I. Matozzo;M. Van Horn</b> | 1983 | No cutaneous metastases               |
| <b>G. Alexiou;M. Papadopoulou-Alexiou;C. P. Karakousis</b>                                                                      | 1984 | No cutaneous metastases               |
| <b>A. G. Wile;J. Novotny;G. R. Mason;V. Passy;M. W. Berns</b>                                                                   | 1984 | No cutaneous metastases               |
| <b>S. Colizza;R. Lupattelli;S. De Fazio;P. Preziosi;F. Karakaci;G. Cucchiara</b>                                                | 1985 | No cutaneous metastases               |
| <b>M. Noguchi;S. Tanaka;H. Fujii;Y. Takikawa;I. Miyazaki</b>                                                                    | 1985 | No cutaneous metastases               |
| <b>P. Schafer;P. Alberto;M. Forni;D. Obradovic;G. Pipard;F. Krauer</b>                                                          | 1987 | No cutaneous metastases               |
| <b>S. F. Bansberg;K. D. Olsen;T. A. Gaffey</b>                                                                                  | 1989 | No cutaneous metastases               |
| <b>P. P. G. Kumar, R. R.; Jones, E. O.; Edney, J. J.; Johansson, S. L.</b>                                                      | 1989 | No cutaneous metastases               |
| <b>D. A. Tandon;S. Bahadur;B. K. Mohanti;G. K. Rath</b>                                                                         | 1994 | No cutaneous metastases               |
| <b>S. E. C. J. Cox, P. D.</b>                                                                                                   | 1994 | No cutaneous metastases               |
| <b>J. L. Glass;R. C. Frazee</b>                                                                                                 | 1995 | No cutaneous metastases               |
| <b>C. D. Z. Brown, J. A.</b>                                                                                                    | 1995 | No cutaneous metastases               |
| <b>R. D. M. Cole, W. F.</b>                                                                                                     | 1995 | No cutaneous metastases               |
| <b>M. C. Schlumberger, C.; De Vathaire, F.;</b>                                                                                 | 1995 | No cutaneous metastases               |

|                                                                                                                                                                        |      |                         |
|------------------------------------------------------------------------------------------------------------------------------------------------------------------------|------|-------------------------|
| <b>Parmentier, C.</b>                                                                                                                                                  |      |                         |
| <b>S. J. Wu;D. R. Lambert</b>                                                                                                                                          | 1997 | No cutaneous metastases |
| <b>S. V. M. Chitale, D. R.; Patel, R.; Gaches, C. G. C.; Ball, R. Y.</b>                                                                                               | 1997 | No cutaneous metastases |
| <b>D. R. H. Christie</b>                                                                                                                                               | 1997 | No cutaneous metastases |
| <b>A. N. Crowson;C. M. Magro;M. C. Mihm, Jr.</b>                                                                                                                       | 1999 | No cutaneous metastases |
| <b>C. Diaz-Cascajo</b>                                                                                                                                                 | 2002 | No cutaneous metastases |
| <b>G. A. R. Georgeu, K. W. D.; El-Muttardi, N.; Mayou, B. J.</b>                                                                                                       | 2002 | No cutaneous metastases |
| <b>V. E. Kouloulis;G. A. Plataniotis;J. R. Kouvaris;C. E. Dardoufas;C. Gennatas;W. Landuyt;K. Pisteveu-Gompaki;L. J. Vlahos</b>                                        | 2003 | No cutaneous metastases |
| <b>A. S. Dieing, C. O.; Schmid, P.; Roever, A. C.; Lehenbauer-Dehm, S.; Jehn, C.; Flath, B.; Possinger, K.</b>                                                         | 2004 | No cutaneous metastases |
| <b>G. G. M. Nyquist, C.; Grau, R.; Crowson, A. N.; Shurman, D. L.; Benedetto, P.; Allen, P.; Lovelace, K.; Smith, D. W.; Frieden, I.; Hybarger, C. P.; Richard, G.</b> | 2007 | No cutaneous metastases |
| <b>J. R. M. Howle, G. J.; Kalnins, I.; Palme, C. E.; Veness, M. J.</b>                                                                                                 | 2008 | No cutaneous metastases |
| <b>K. M. Tada, H.; Iijima, K.; Miyagi, Y.; Nishimura, S.; Makita, M.; Horii, R.; Akiyama, F.; Iwase, T.</b>                                                            | 2008 | No cutaneous metastases |
| <b>D. R. Gomez;J. E. Zhung;J. Gomez;K. Chan;A. J. Wu;S. L. Wolden;D. G. Pfister;A. Shaha;J. P. Shah;D. H. Kraus;R. J. Wong;N. Y. Lee</b>                               | 2009 | No cutaneous metastases |
| <b>T. W. Beer</b>                                                                                                                                                      | 2011 | No cutaneous metastases |
| <b>V. O. P. Munoz Madero, G.</b>                                                                                                                                       | 2011 | No cutaneous metastases |
| <b>M. Gargiulo;A. Papa;P. Capasso;M. Moio;E. Cubicciotti;S. Parascandolo</b>                                                                                           | 2012 | No cutaneous metastases |
| <b>A. Pramana;L. Browne;P. H. Graham</b>                                                                                                                               | 2012 | No cutaneous metastases |
| <b>A. Gojkovic-Horvat;B. Jancar;M. Blas;B. Zumer;K. Karner;M. Hocevar;P. Strojjan</b>                                                                                  | 2012 | No cutaneous metastases |
| <b>J. M. Goodenough, H.; Shaaban, H.</b>                                                                                                                               | 2013 | No cutaneous metastases |
| <b>G. E. Moore;R. E. Gerner</b>                                                                                                                                        | 1970 | No Local therapy        |
| <b>K. R. Cox</b>                                                                                                                                                       | 1974 | No Local therapy        |
| <b>I. M. Reingold;B. R. Smith</b>                                                                                                                                      | 1978 | No Local therapy        |
| <b>L. F. Diehl;M. A. Hurwitz;S. A. Johnson;W. M. Butler;H. G. Taylor</b>                                                                                               | 1984 | No Local therapy        |
| <b>H. Y. Pak;B. A. Foster;S. B. Yokota</b>                                                                                                                             | 1987 | No Local therapy        |
| <b>J. I. Spector;H. Zimble;M. DeLeo;J. S. Ross</b>                                                                                                                     | 1987 | No Local therapy        |
| <b>J. E. Krige;H. S. King;R. M. Strover</b>                                                                                                                            | 1988 | No Local therapy        |
| <b>D. P. S. Lookingbill, N.; Sexton, F. M.</b>                                                                                                                         | 1990 | No Local therapy        |
| <b>C. L. S. Slingluff Jr, H. F.</b>                                                                                                                                    | 1992 | No Local therapy        |
| <b>R. Dummer;J. C. Becker;C. Eilles;E. Schafer;W. Borner;G. Burg</b>                                                                                                   | 1993 | No Local therapy        |
| <b>G. T. M. Elliott, R. A.; Perez, J.; Von Eschen, K. B.</b>                                                                                                           | 1993 | No Local therapy        |
| <b>I. B. Eckman, R. H.; Rickert, R. R.</b>                                                                                                                             | 1994 | No Local therapy        |
| <b>M. Hahka-Kemppinen;T. Muhonen;M. Virolainen;A. Jekunen;S. Asko-Seljavaara;S. Pyrhonen</b>                                                                           | 1995 | No Local therapy        |
| <b>B. Lissak;J. M. Vannetzel;N. Gallouedec;J. L. Berrod;M. Rieu</b>                                                                                                    | 1995 | No Local therapy        |
| <b>A. W. Barth, L. A.; Morton, D. L.</b>                                                                                                                               | 1995 | No Local therapy        |
| <b>S. H. W. Cha, Y. H.; Chun, I. K.</b>                                                                                                                                | 1995 | No Local therapy        |
| <b>M. Miyahara;Y. Hamanaka;A. Kawabata;Y. Sato;A.</b>                                                                                                                  | 1996 | No Local therapy        |

|                                                                                                                                                                                                                                          |      |                  |
|------------------------------------------------------------------------------------------------------------------------------------------------------------------------------------------------------------------------------------------|------|------------------|
| <b>Tanaka;A. Yamamoto;T. Ueno;K. Nishihara;T. Suzuki</b>                                                                                                                                                                                 |      |                  |
| <b>E. P. P. Duran, A.; Farina, M. C.; Escalonilla, P.; Soriano, M. L.; Olivares, M.; Sarasa, J. L.; Martin, L.; Requena, L.</b>                                                                                                          | 1996 | No Local therapy |
| <b>A. A.-N. Naasan, A.; Quaba, A.</b>                                                                                                                                                                                                    | 1996 | No Local therapy |
| <b>S. N. Nakano, R.; Yamamoto, M.; Ogami, Y.; Otsuki, M.</b>                                                                                                                                                                             | 1996 | No Local therapy |
| <b>A. M. Virgili, C.; La Malfa, V.</b>                                                                                                                                                                                                   | 1997 | No Local therapy |
| <b>K. F. Helm;E. Y. Billingsley;B. C. Zangwill;R. A. Schwartz</b>                                                                                                                                                                        | 1998 | No Local therapy |
| <b>I. S. Gage, S. J.; Recht, A.; Abner, A.; Come, S.; Shulman, L. N.; Monson, J. M.; Silver, B.; Harris, J. R.; Connolly, J. L.</b>                                                                                                      | 1998 | No Local therapy |
| <b>U. N. M. H. Rao, S. H.; Lotze, M. T.; Karakousis, C. P.</b>                                                                                                                                                                           | 1998 | No Local therapy |
| <b>M. S. Kimura, R.; Shimokawa, Y.; Iwai, K.; Uemura, K.; Yasunaga, T.</b>                                                                                                                                                               | 1999 | No Local therapy |
| <b>W. A. Wesche;V. K. Khare;T. M. Chesney;J. J. Jenkins</b>                                                                                                                                                                              | 2000 | No Local therapy |
| <b>M. C. Panelli;J. Wunderlich;J. Jeffries;E. Wang;A. Mixon;S. A. Rosenberg;F. M. Marincola</b>                                                                                                                                          | 2000 | No Local therapy |
| <b>M. V. Goreti Catorze, R.; Iria, I.; Afonso, A.; Assis Pacheco, F.</b>                                                                                                                                                                 | 2000 | No Local therapy |
| <b>J. C. R. Morris, W. J.; Wildner, O.; Muslow, H. A.; Aguilar-Cordova, E.; Blaese, R. M.</b>                                                                                                                                            | 2000 | No Local therapy |
| <b>I. Pappo;M. Lotem;M. Klein;R. Orda</b>                                                                                                                                                                                                | 2001 | No Local therapy |
| <b>A. Yoskovitch;M. P. Hier;A. Okraimec;M. J. Black;L. Rochon</b>                                                                                                                                                                        | 2001 | No Local therapy |
| <b>S. S. T. Leong, E. H.; Khoo-Tan, H. S.; Yang, T. L.; Wee, J.; Tan, S. H.; Poh, W. T.; Tan, N. G.</b>                                                                                                                                  | 2001 | No Local therapy |
| <b>M. J. P. Izquierdo, M. A.; Carrasco, L.; Requena, C.; Farina, M. C.; Martin, L.; Sarasa, J. L.; Requena, L.</b>                                                                                                                       | 2002 | No Local therapy |
| <b>R. A. Rajagopal, P. N.; Ramasastry, C. V.; Kar, P. K.</b>                                                                                                                                                                             | 2004 | No Local therapy |
| <b>G. K. Biswas, A.; Kulkarni, P.; Bakshi, A.; Nair, C.; Kurkure, P.; Muckaden, M.; Parikh, P.</b>                                                                                                                                       | 2005 | No Local therapy |
| <b>T. G. Puri, G.; Sharma, D. N.; Julka, P. K.</b>                                                                                                                                                                                       | 2005 | No Local therapy |
| <b>M. Pashenkov;G. Goess;C. Wagner;M. Hormann;T. Jandl;A. Moser;C. M. Britten;J. Smolle;S. Koller;C. Mauch;I. Tancheva-Poor;S. Grabbe;C. Loquai;S. Esser;T. Franckson;A. Schneeberger;C. Haarmann;A. M. Krieg;G. Stingl;S. N. Wagner</b> | 2006 | No Local therapy |
| <b>H. Alkhayat;C. H. Hong</b>                                                                                                                                                                                                            | 2006 | No Local therapy |
| <b>K. S. Resnik;M. DiLeonardo;G. Gibbons</b>                                                                                                                                                                                             | 2006 | No Local therapy |
| <b>R. King;J. Lyons;A. L. Meyers;P. B. Googe;R. N. Page;V. K. Gupta</b>                                                                                                                                                                  | 2007 | No Local therapy |
| <b>J. M. Marcoval, A.; Peyri, J.</b>                                                                                                                                                                                                     | 2007 | No Local therapy |
| <b>J. J. M. Torres, R.; Alonso, T.; Morral, M.; Garcia-Arumi, J.; Myint, S.; Nesi, F. A.; Shields, J. A.</b>                                                                                                                             | 2007 | No Local therapy |
| <b>A. B. Masmoudi, S.; Charfeddine, A.; Dammak, A.; Amouri, M.; Khabir, A.; Marrekchi, S.; Bouassida, S.; Sallemi, T.; Krichen, M. S.; Turki, H.; Zahaf, A.</b>                                                                          | 2008 | No Local therapy |
| <b>K. T. T. Vadnal, N.; Pozek, I.; Kecelj, P.; Kosnik, M.</b>                                                                                                                                                                            | 2008 | No Local therapy |
| <b>P. Savoia;P. Fava;T. Deboli;P. Quaglino;M. G. Bernengo</b>                                                                                                                                                                            | 2009 | No Local therapy |
| <b>B. L. Cheng, W.; Xiaoyun, W.; Xia, C. Y.; Xie, X.</b>                                                                                                                                                                                 | 2009 | No Local therapy |

|                                                                                                                                                                                                                           |      |                                                  |
|---------------------------------------------------------------------------------------------------------------------------------------------------------------------------------------------------------------------------|------|--------------------------------------------------|
| <b>L. V. B. Pierret, N.; Bonehill, A.; Corthals, J.; Van Nuffel, A. M. T.; Heirman, C.; Roelandt, T.; De Coninck, A.; Van Riet, I.; Degreef, E.; Goossens, A.; Verfaillie, G.; Roseeuw, D.; Thielemans, K.; Neyns, B.</b> | 2009 | No Local therapy                                 |
| <b>S. P. Prabhu, S.; Handattu, S.; Kudur, M.; Vasanth, V.</b>                                                                                                                                                             | 2009 | No Local therapy                                 |
| <b>A. Fernandez-Flores</b>                                                                                                                                                                                                | 2010 | No Local therapy                                 |
| <b>E. U. Cidon</b>                                                                                                                                                                                                        | 2010 | No Local therapy                                 |
| <b>P. M. Kumar, A.; Sarkar, T.; Gharami, R. C.; Das, N. K.; Chowdhury, S. N.; Maiti, A.</b>                                                                                                                               | 2010 | No Local therapy                                 |
| <b>J. S. Lee, E. Y.</b>                                                                                                                                                                                                   | 2010 | No Local therapy                                 |
| <b>P. F. Savoia, P.; Osella-Abate, S.; Nardo, T.; Comessatti, A.; Quaglino, P.; Bernengo, M. G.</b>                                                                                                                       | 2010 | No Local therapy                                 |
| <b>K. L. S. West, M. A.; Puri, P. K.</b>                                                                                                                                                                                  | 2010 | No Local therapy                                 |
| <b>C. S. Tamas, C.; Turliuc, D.; Popa, L.; Morosanu, C.; Radulescu, D.</b>                                                                                                                                                | 2011 | No Local therapy                                 |
| <b>S. Y. L. Hyun, J. H.; Shin, H. S.; Lee, S. W.; Park, Y. N.; Park, J. Y.</b>                                                                                                                                            | 2011 | No Local therapy                                 |
| <b>Z. Song;B. Lin;L. Shao;Y. Zhang</b>                                                                                                                                                                                    | 2012 | No Local therapy                                 |
| <b>M. Cantos-Pallares;J. Garcia-Armengol;C. Mulas-Fernandez;C. Sancho-Moya;I. Fabra-Cabrera;M. Bruna-Esteban;J. V. Roig-Vila</b>                                                                                          | 2012 | No Local therapy                                 |
| <b>K. K. Matsumoto, T.; Kubo, H.; Takata, M.; Kiniwa, Y.; Murata, H.; Hayashi, K.; Uhara, H.; Ferrone, S.; Saida, T.</b>                                                                                                  | 2012 | No Local therapy                                 |
| <b>M. O. A. Samaila, A. G.; Waziri, G. D.; Koledade, K. A.; Kolawole, A. O.</b>                                                                                                                                           | 2012 | No Local therapy                                 |
| <b>W. L. B.-V. Wang, R. A.; Prieto, V. G.; Pollock, R. E.; Lev, D. C.; Lazar, A. J.</b>                                                                                                                                   | 2012 | No Local therapy                                 |
| <b>J. K. Kaufmann;S. Bossow;C. Grossardt;S. Sawall;J. Kupsch;P. Erbs;J. C. Hassel;C. von Kalle;A. H. Enk;D. M. Nettelbeck;G. Ungerechts</b>                                                                               | 2013 | No Local therapy                                 |
| <b>J. Purkayastha</b>                                                                                                                                                                                                     | 2013 | No Local therapy                                 |
| <b>F. R. Eilber;D. L. Morton</b>                                                                                                                                                                                          | 1970 | No response of cutaneous metastases specifically |
| <b>N. Jaffe;D. Paed;S. Farber;D. Traggis;C. Geiser;B. S. Kim;L. Das;G. Frauenberger;I. Djerassi;J. R. Cassidy</b>                                                                                                         | 1973 | No response of cutaneous metastases specifically |
| <b>R. I. Wagner;A. P. Kozlov;K. G. Moskalik;L. M. Khachaturyan;O. L. Pertsov</b>                                                                                                                                          | 1975 | No response of cutaneous metastases specifically |
| <b>N. Tokita;J. H. Kim;B. S. Hilaris</b>                                                                                                                                                                                  | 1980 | No response of cutaneous metastases specifically |
| <b>G. M. Bandieramonte, R.; Melloni, E.</b>                                                                                                                                                                               | 1984 | No response of cutaneous metastases specifically |
| <b>D. H. Clarke;M. G. Le;D. Sarrazin;M. J. Lacombe;F. Fontaine;J. P. Travagli;F. May-Levin;G. Contesso;R. Arriagada</b>                                                                                                   | 1985 | No response of cutaneous metastases specifically |
| <b>N. A. Fastenberg;R. G. Martin;A. U. Buzdar;G. N. Hortobagyi;E. D. Montague;G. R. Blumenschein;J. M. Jessup</b>                                                                                                         | 1985 | No response of cutaneous metastases specifically |
| <b>J. M. D. Cosset, J.; Haie, C.</b>                                                                                                                                                                                      | 1985 | No response of cutaneous metastases specifically |
| <b>L. Dewit;H. Bartelink;P. Rumke</b>                                                                                                                                                                                     | 1985 | No response of cutaneous metastases specifically |
| <b>N. Thatcher;A. Mene;S. S. Banerjee;P. Craig;N. Gleave;C. Orton</b>                                                                                                                                                     | 1986 | No response of cutaneous metastases specifically |
| <b>I. L. S. Wornom Iii, J. W.; Seng-Jaw, Soong</b>                                                                                                                                                                        | 1986 | No response of cutaneous metastases specifically |
| <b>V. M. Sacchini, E.; Marchesini, R.</b>                                                                                                                                                                                 | 1987 | No response of cutaneous metastases specifically |
| <b>A. B. Menter, A. S.; McCaffree, D. M.</b>                                                                                                                                                                              | 1989 | No response of cutaneous metastases specifically |
| <b>W. T. Sause;J. S. Cooper;S. Rush;C. T. Ago;D.</b>                                                                                                                                                                      | 1991 | No response of cutaneous metastases specifically |



|                                                                                                                                                                                                                                                                   |      |                                                  |
|-------------------------------------------------------------------------------------------------------------------------------------------------------------------------------------------------------------------------------------------------------------------|------|--------------------------------------------------|
| <b>Cosmatos;C. T. Coughlin;N. JanJan;J. Lipsett</b>                                                                                                                                                                                                               |      |                                                  |
| <b>R. D. Dummer, M.; Burg, G.</b>                                                                                                                                                                                                                                 | 1994 | No response of cutaneous metastases specifically |
| <b>K. Shimozuma;H. Sonoo;K. Ichihara</b>                                                                                                                                                                                                                          | 1995 | No response of cutaneous metastases specifically |
| <b>C. U. E. Brand, U.; Stroebel, W.; Meier, F.; Schlagenhauff, B.; Rassner, G.; Garbe, C.</b>                                                                                                                                                                     | 1997 | No response of cutaneous metastases specifically |
| <b>O. K. Eton, D. D.; Gianan, M. A.; Ross, M. I.; Itoh, K.; Pride, M. W.; Donawho, C.; Buzaid, A. C.; Mansfield, P. F.; Lee, J. E.; Legha, S. S.; Plager, C.; Papadopoulos, N. E.; Bedikian, A. Y.; Benjamin, R. S.; Balch, C. M.</b>                             | 1998 | No response of cutaneous metastases specifically |
| <b>T. Meyer;S. Merkel;J. Goehl;W. Hohenberger</b>                                                                                                                                                                                                                 | 2000 | No response of cutaneous metastases specifically |
| <b>J. F. Atzpodien, M.; Reitz, M.</b>                                                                                                                                                                                                                             | 2004 | No response of cutaneous metastases specifically |
| <b>R. L. Essner, J. H.; Wanek, L. A.; Itakura, H.; Morton, D. L.; Coats, R. E.; Wong, J. H.; Leong, S. P. L.; Goodnight Jr, J. E.</b>                                                                                                                             | 2004 | No response of cutaneous metastases specifically |
| <b>K. v. d. P.-F. Manders, L. V.; Creemers, G. J.; Vreugdenhil, G.; van der Sangen, M. J. C.; Nieuwenhuijzen, G. A. P.; Roumen, R. M. H.; Voogd, A. C.</b>                                                                                                        | 2006 | No response of cutaneous metastases specifically |
| <b>L. A. M. Solomon, A. R.; Vorugu, V. R.; Deppe, G.; Adam, B.; Malone Jr, J. M.; Littrup, P. J.</b>                                                                                                                                                              | 2008 | No response of cutaneous metastases specifically |
| <b>E. F. Soriano, C.; Lantuejoul, S.; Reyt, E.; Bolla, M.; Brambilla, E.; Righini, C. A.</b>                                                                                                                                                                      | 2008 | No response of cutaneous metastases specifically |
| <b>M. K. Wobser, N.; Ugurel, S.; Brocker, E. B.; Becker, J. C.</b>                                                                                                                                                                                                | 2009 | No response of cutaneous metastases specifically |
| <b>B. C. Tavaniello, A.; Palo, S.; Tassone, D.; Negosanti, L.; Nejad, P.; Pinto, V.; Zannetti, G.</b>                                                                                                                                                             | 2010 | No response of cutaneous metastases specifically |
| <b>J. R. Haeusler, A.; Boelling, T.; Gosheger, G.; Braun-Munzinger, G.; Vieth, V.; Burdach, S.; Van Den Berg, H.; Juergens, H.; Dirksen, U.</b>                                                                                                                   | 2010 | No response of cutaneous metastases specifically |
| <b>A. A. Antonelli, N.; Corti, S.; Legramanti, S.; Zanotelli, T.; Cozzoli, A.; Cunico, S. C.; Simeone, C.</b>                                                                                                                                                     | 2012 | No response of cutaneous metastases specifically |
| <b>C. A. P. Barker, M. A.; Callahan, M. K.; Khan, S.; Beal, K.; Parhar, P. K.; Lee, N. Y.; Yamada, Y.; Wolchok, J. D.</b>                                                                                                                                         | 2012 | No response of cutaneous metastases specifically |
| <b>D. R. D. L. Jose Farre Alegre, M.; VicenteMunoz Madero, D. R.; Pere Bretcha Boix, D. R.; Joseba Rebollo Liceaga, D. R.; Manuel Sureda, D. R.; Carlos Dussan Luberth, D. R.; Antonio Bugarolas Mallorens, D. R.</b>                                             | 2012 | No response of cutaneous metastases specifically |
| <b>M. A. B. Postow, C. A.; Khan, S. A.; Wolchok, J. D.</b>                                                                                                                                                                                                        | 2012 | No response of cutaneous metastases specifically |
| <b>J. H. Howard;J. F. Thompson;N. Mozzillo;O. E. Nieweg;H. J. Hoekstra;D. F. Roses;V. K. Sondak;D. S. Reintgen;M. Kashani-Sabet;C. P. Karakousis;B. J. Coventry;W. G. Kraybill;B. M. Smithers;R. Elashoff;S. L. Stern;A. J. Cochran;M. B. Faries;D. L. Morton</b> | 2012 | No response of cutaneous metastases specifically |
| <b>D. L. Morton;J. E. Goodnight, Jr.</b>                                                                                                                                                                                                                          | 1978 | Review article or no unique data                 |
| <b>J. R. Harris;M. B. Levene;S. Hellman</b>                                                                                                                                                                                                                       | 1978 | Review article or no unique data                 |
| <b>W. L. Donegan</b>                                                                                                                                                                                                                                              | 1979 | Review article or no unique data                 |
| <b>L. Goldman</b>                                                                                                                                                                                                                                                 | 1979 | Review article or no unique data                 |
| <b>S. Oka</b>                                                                                                                                                                                                                                                     | 1980 | Review article or no unique data                 |
| <b>J. E. Bennett;C. W. Hanke;N. C. Estes;L. H. Einhorn</b>                                                                                                                                                                                                        | 1982 | Review article or no unique data                 |
| <b>C. Miaskowski</b>                                                                                                                                                                                                                                              | 1983 | Review article or no unique data                 |
| <b>F. Truchetet;E. Heid;J. Friedel;C. Chartier;E. Grosshans</b>                                                                                                                                                                                                   | 1989 | Review article or no unique data                 |

|                                                                                                                                                                                                                                                               |      |                                  |
|---------------------------------------------------------------------------------------------------------------------------------------------------------------------------------------------------------------------------------------------------------------|------|----------------------------------|
| <b>D. J. Pritchard;F. H. Sim</b>                                                                                                                                                                                                                              | 1989 | Review article or no unique data |
|                                                                                                                                                                                                                                                               | 1989 | Review article or no unique data |
| <b>J. K. Tan;V. C. Ho</b>                                                                                                                                                                                                                                     | 1993 | Review article or no unique data |
|                                                                                                                                                                                                                                                               | 1993 | Review article or no unique data |
|                                                                                                                                                                                                                                                               | 1993 | Review article or no unique data |
| <b>S. T. T. Kmucha, J. M.</b>                                                                                                                                                                                                                                 | 1993 | Review article or no unique data |
| <b>H. J. Sindermann, K.; Burk, K.</b>                                                                                                                                                                                                                         | 1994 | Review article or no unique data |
| <b>P. E. Hilgard, J.</b>                                                                                                                                                                                                                                      | 1994 | Review article or no unique data |
| <b>J. M. Kozlowski</b>                                                                                                                                                                                                                                        | 1994 | Review article or no unique data |
| <b>H. G. Wandt, W. M.</b>                                                                                                                                                                                                                                     | 1994 | Review article or no unique data |
| <b>A. M. M. Eggermont</b>                                                                                                                                                                                                                                     | 1995 | Review article or no unique data |
| <b>H. R. Dorrance;P. J. O'Dwyer</b>                                                                                                                                                                                                                           | 1996 | Review article or no unique data |
|                                                                                                                                                                                                                                                               | 1998 | Review article or no unique data |
| <b>D. F. Vordermark, M.</b>                                                                                                                                                                                                                                   | 1999 | Review article or no unique data |
| <b>W. Ten Bokkel Huinink</b>                                                                                                                                                                                                                                  | 2000 | Review article or no unique data |
| <b>A. B. C. Ackerman, L.</b>                                                                                                                                                                                                                                  | 2000 | Review article or no unique data |
| <b>J. R. W. Wong, C. C.</b>                                                                                                                                                                                                                                   | 2001 | Review article or no unique data |
| <b>K. A. Salva</b>                                                                                                                                                                                                                                            | 2002 | Review article or no unique data |
| <b>D. J. Eedy</b>                                                                                                                                                                                                                                             | 2003 | Review article or no unique data |
| <b>E. Hitt</b>                                                                                                                                                                                                                                                | 2003 | Review article or no unique data |
| <b>P. G. H. Rose, B.</b>                                                                                                                                                                                                                                      | 2003 | Review article or no unique data |
| <b>I. H. Wolf;E. Richtig;D. Kopera;H. Kerl</b>                                                                                                                                                                                                                | 2004 | Review article or no unique data |
| <b>M. P. Schon;M. Schon</b>                                                                                                                                                                                                                                   | 2004 | Review article or no unique data |
| <b>S. G. Dawson-Bowling, A.; Healy, C.</b>                                                                                                                                                                                                                    | 2004 | Review article or no unique data |
| <b>D. L. P. Drvar, A.; Manola, I.; Rados, J.; Dobric, I.; Loncaric, D.</b>                                                                                                                                                                                    | 2005 | Review article or no unique data |
| <b>S. E. L. McAchran, O. A.; Resnick, M. I.</b>                                                                                                                                                                                                               | 2005 | Review article or no unique data |
| <b>R. F. Giardino, M.; Bonazzi, V.; Cadossi, R.; Nicolini, A.; Carpi, A.</b>                                                                                                                                                                                  | 2006 | Review article or no unique data |
| <b>L. M. G. Mir, J.; Sersa, G.; Collins, C. G.; Garbay, J. R.; Billard, V.; Geertsen, P. F.; Rudolf, Z.; O'Sullivan, G. C.; Marty, M.</b>                                                                                                                     | 2006 | Review article or no unique data |
| <b>D. W. Ollila</b>                                                                                                                                                                                                                                           | 2006 | Review article or no unique data |
| <b>L. M. Mir</b>                                                                                                                                                                                                                                              | 2006 | Review article or no unique data |
|                                                                                                                                                                                                                                                               | 2006 | Review article or no unique data |
| <b>S. F. Cramer</b>                                                                                                                                                                                                                                           | 2007 | Review article or no unique data |
| <b>S. Nicholson</b>                                                                                                                                                                                                                                           | 2009 | Review article or no unique data |
| <b>D. C. Torchia, P.</b>                                                                                                                                                                                                                                      | 2010 | Review article or no unique data |
| <b>J. D. B. Van Der Zee, M.; Mens, J. W. M.; Ameziane, A.; Broekmeyer-Reurink, M. P.; Drizdal, T.; Linthorst, M.; Van Rhoon, G. C.</b>                                                                                                                        | 2010 | Review article or no unique data |
| <b>H. V. Worthington;J. E. Clarkson;P. Coulthard;S. Deacon;M. Esposito;L. M. Fernandez-Mauleffinch;R. Floate;S. Furness;A. M. Glenny;J. Harrison;T. Johnson;J. Leese;A. Littlewood;V. Marinho;M. McCabe;I. Needleman;P. Riley;W. C. Shaw;T. Walsh;M. Wong</b> | 2010 | Review article or no unique data |
| <b>G. Sersa;M. Cemazar;M. Snoj</b>                                                                                                                                                                                                                            | 2011 | Review article or no unique data |
| <b>D. M. C. Higgins, J.; Parker, S.; Disis, M. L.; Salazar, L. G.</b>                                                                                                                                                                                         | 2011 | Review article or no unique data |
| <b>J. Morrison;C. Williams;R. Grant;M. Hart;G. Quinn;C. Jess;T. Bishop;J. Hayes</b>                                                                                                                                                                           | 2011 | Review article or no unique data |
| <b>R. K. Bobba;J. L. Odem;D. C. Doll;M. C. Perry</b>                                                                                                                                                                                                          | 2012 | Review article or no unique data |
| <b>C. Perisano;M. S. Spinelli;C. Graci;L. Scaramuzzo;E. Marzetti;C. Barone;C. Fabbriciani;G. Maccauro</b>                                                                                                                                                     | 2012 | Review article or no unique data |

|                                                                                                                                                                                 |      |                                  |
|---------------------------------------------------------------------------------------------------------------------------------------------------------------------------------|------|----------------------------------|
| <b>J. Q. W. Del Rosso, Wm P.</b>                                                                                                                                                | 2012 | Review article or no unique data |
| <b>H. Kohrt</b>                                                                                                                                                                 | 2012 | Review article or no unique data |
|                                                                                                                                                                                 | 2012 | Review article or no unique data |
| <b>L. Dooley;S. Thorning;C. Dooley;C. Mar</b>                                                                                                                                   | 2012 | Review article or no unique data |
| <b>N. Wilcken;A. Goodwin;A. Alderman;J. Barrett;M. Clarke;P. Dinh;P. Ganz;A. Gennari;D. Gherzi;I. C. Henderson;B. Hickey;M. Maya;K. Moore;D. O'Connell;R. J. Simes;S. Walsh</b> | 2012 | Review article or no unique data |
| <b>M. D. D. Janosky, S.; Novik, Y.; Oratz, R.; Tiersten, A.; Goldberg, J. D.; Wang, E.; Marincola, F.; Formenti, S.; Adams, S.</b>                                              | 2013 | Review article or no unique data |
| <b>E. Ben-Josef</b>                                                                                                                                                             | 2013 | Review article or no unique data |

<sup>a</sup> Only one reason listed per study for reason for exclusion, however many studies had multiple reasons for exclusion.

### Stage 3 Study Selection

Studies remaining after Stage 2 were individually compared using author name and treatment modality to detect the re-reporting of data. If a record was deemed to be re-reported, then the most recent version with the largest patient number was used. If the patient number was unchanged, then the most recent version or the most complete reporting of response and toxicity was used.

### Stage 3: Records Excluded and Reason for Exclusion

| <b>Author</b>                                                                                                                    | <b>Year</b> | <b>Reason for Exclusion</b> |
|----------------------------------------------------------------------------------------------------------------------------------|-------------|-----------------------------|
| <b>M. J. Mastrangelo;H. C. Maguire, Jr.;L. C. Eisenlohr;C. E. Laughlin;C. E. Monken;P. A. McCue;A. J. Kovatich;E. C. Lattime</b> | 1999        | Re-reporting of data        |
| <b>M. F. Naylor;W. R. Chen;T. K. Teague;L. A. Perry;R. E. Nordquist</b>                                                          | 2006        | Re-reporting of data        |

|                                                                                                                                                |      |                      |
|------------------------------------------------------------------------------------------------------------------------------------------------|------|----------------------|
| <b>L. F. Glass;M. L. Pepine;N. A. Fenske;M. Jaroszeski;D. S. Reintgen;R. Heller</b>                                                            | 1996 | Re-reporting of data |
| <b>P. Giraud;J. M. Bachaud;J. Teissie;M. P. Rols</b>                                                                                           | 1996 | Re-reporting of data |
| <b>C. Unger;H. Eibl;A. Breiser;H. W. von Heyden;J. Engel;P. Hilgard;H. Sindermann;M. Peukert;G. A. Nagel</b>                                   | 1988 | Re-reporting of data |
| <b>C. Unger;M. Peukert;H. Sindermann;P. Hilgard;G. Nagel;H. Eibl</b>                                                                           | 1990 | Re-reporting of data |
| <b>C. Unger;H. Eibl</b>                                                                                                                        | 1991 | Re-reporting of data |
| <b>M. Schuh;U. O. Nseyo;W. R. Potter;T. L. Dao;T. J. Dougherty</b>                                                                             | 1987 | Re-reporting of data |
| <b>S. G. Clive, J.; Leonard, R. C. F.</b>                                                                                                      | 2000 | Re-reporting of data |
| <b>L. D. R. Ozzello, C. M.; Habif Sr, D. V.; Cantell, K.; Pestka, S.</b>                                                                       | 1995 | Re-reporting of data |
| <b>D. L. T. Damian, J. F.</b>                                                                                                                  | 2011 | Re-reporting of data |
| <b>D. T. Damian, J.</b>                                                                                                                        | 2011 | Re-reporting of data |
| <b>D. L. Damian</b>                                                                                                                            | 2012 | Re-reporting of data |
| <b>D. L. Damian</b>                                                                                                                            | 2012 | Re-reporting of data |
| <b>S. M. Adams, F.; Meng, T. C.; Chiriboga, L.; Speyer, J.; Novik, Y.; Goldberg, J.; Tiersten, A.; Formenti, S.; Bhardwaj, N.; Demaria, S.</b> | 2011 | Re-reporting of data |
| <b>B. E. Weide, T. K.; Pflugfelder, A.; Leiter, U.; Meier, F.; Bauer, J.; Schmidt, D.; Radny, P.; Pfohler, C.; Garbe, C.</b>                   | 2011 | Re-reporting of data |

#### **Stage 4 Study Selection**

Stage 4 excluded any non-prospective studies/trials remaining after Stage 3. All studies below were retrospective case series. If a study did not explicitly state its study methodology, unless it was clearly stated that the study was prospective, a clinical trial, or pilot study, then the study was assumed to be retrospective in nature.

#### Stage 4 Records Excluded and Reason for Exclusion

| First author                                                                                                   | Year | Reason for Exclusion                                |
|----------------------------------------------------------------------------------------------------------------|------|-----------------------------------------------------|
|                                                                                                                |      | <b>1. Randomized controlled clinical trials.</b>    |
|                                                                                                                |      | <b>A. Double-blinded.</b>                           |
|                                                                                                                |      | <b>B. Nonblinded treatment delivery.</b>            |
|                                                                                                                |      | <b>2. Nonrandomized controlled clinical trials.</b> |
|                                                                                                                |      | <b>3. Case series.</b>                              |
|                                                                                                                |      | <b>A. Population-based, consecutive series.</b>     |
|                                                                                                                |      | <b>B. Consecutive cases (not population-based).</b> |
|                                                                                                                |      | <b>C. Nonconsecutive cases.</b>                     |
| B. S. R. Hilaris, M.; Calabrese, A. S.; Phillips Rf Henschke, U. K.                                            | 1963 | 3C                                                  |
| S. Malek-Mansour                                                                                               | 1973 | 3C                                                  |
| M. J. S. Mastrangelo, H. L.; Prehn, L. M.; Bornstein, R. S.; Yarbrow, J. W.; Prehn, R. T.                      | 1976 | 3C                                                  |
| H. J. F. Habermalz, J. J.                                                                                      | 1976 | 3C                                                  |
| S. E. H. Krown, E. Y.; Pinsky, C. M.; Hirshaut, Y.; Wanebo, H. J.; Hansen, J. A.; Huvos, A. G.; Oettgen, H. F. | 1978 | 3B                                                  |
| F. K. S. Storm, F. C.; Morton, D. L.                                                                           | 1979 | 3C                                                  |
| N. M. Levine, F. L.                                                                                            | 1980 | 3C                                                  |
| P. A. L. Lobo, E. J.; Chao, J. J.; Kanji, A. M.                                                                | 1981 | 3C                                                  |
| H. R. Katz                                                                                                     | 1981 | 3C                                                  |
| P. B. Bar-Sella, A.; Robinson, E.; Nir, I.                                                                     | 1981 | 3C                                                  |
| A. G. D. Wile, A.; Burns, R. G.; Berns, M. W.                                                                  | 1982 | 3C                                                  |
| A. G. D. Wile, A.; Burns, R. G.; Berns, M. W.                                                                  | 1982 | 3C                                                  |
| L. P. Illig, E.; Bodeker, R. H.                                                                                | 1984 | 3C                                                  |
| R. F. M. Irie, D. L.                                                                                           | 1986 | 3C                                                  |
| T. K. Naruse, A.; Miyashita, A.; Matsumoto, K.; Suzumura, K.; Kanemitsu, T.; Kato, K.; Yamamoto, S.            | 1987 | 3C                                                  |
| J. B. E. Konefal, B.; Pilepich, M. V.                                                                          | 1987 | 3C                                                  |
| E. P. Budzanowska, M.                                                                                          | 1988 | 3C                                                  |
| P. B. von Wussow, B.; Hartmann, F.; Deicher, H.                                                                | 1988 | 3C                                                  |
| M. C. Bower, K. W.; Stein, R. C.; Hedley, A.; Gazet, J. C.; Ford, H. T.; Combes, R. C.                         | 1991 | 3C                                                  |
| S. A. D. Khan, T. J.; Mang, T. S.                                                                              | 1993 | 3C                                                  |
| M. E. R. T. O'Brien, D.; MacLennan, K.; Smith, I. E.                                                           | 1993 | 3C                                                  |
| H. A. Koren, G.; Schenk, G. M.; Jindra, R. H.                                                                  | 1994 | 3C                                                  |
| D. V. O. Habif, L.; Rosa, C. M.; Cantell, K.; Lattes, R.                                                       | 1995 | 3C                                                  |
| V. H. J. Svoboda                                                                                               | 1995 | 3C                                                  |
| Z. H. Si, P.; Coates, A. S.                                                                                    | 1996 | 3C                                                  |
| M. P. Lapes, J.; Jirsa, M.                                                                                     | 1996 | 3C                                                  |
| B. B. W. Herrick, L. D.; Ross, D. A.; Sasaki, C. T.; Son, Y. H.                                                | 1996 | 3C                                                  |
| L. J. H. Strobbe, A. A.; Rumke, P.; Israels, S. P.; Nieweg, O. E.; Kroon, B. B.                                | 1997 | 3C                                                  |
| R. J. Heller, M. J.; Reintgen, D. S.; Puleo, C. A.; DeConti, R. C.; Gilbert, R. A.; Glass, L. F.               | 1998 | 3C                                                  |
| R. J. Heller, M. J.; Reintgen, D. S.; Puleo, C. A.; DeConti, R. C.; Gilbert, R. A.; Glass, L. F.               | 1998 | 3C                                                  |
| S. W. F. Taber, V. H.; Wieman, T. J.                                                                           | 1998 | 3C                                                  |

|                                                                                                                                                                            |      |    |
|----------------------------------------------------------------------------------------------------------------------------------------------------------------------------|------|----|
| S. G. Clive, J.; Leonard, R. C.                                                                                                                                            | 1999 | 3C |
| M. J. M. Mastrangelo, H. C.; Lattime, E. C.                                                                                                                                | 2000 | 3C |
| E. H. Yoden, J.; Imajo, Y.; Yamamoto, S.;<br>Kurebayashi, J.; Shimozuma, K.; Sonoo, H.                                                                                     | 2000 | 3C |
| M. P. B. Rols, J. M.; Giraud, P.; Chevreau, C.; Roche,<br>H.; Teissie, J.                                                                                                  | 2000 | 3C |
| P. L. K. Triozzi, R.; Aldrich, W. A.; Walker, M. J.;<br>Kim, J. A.; Jaynes, S.                                                                                             | 2000 | 3C |
| P. L. K. Triozzi, R.; Aldrich, W. A.; Walker, M. J.;<br>Kim, J. A.; Jaynes, S.                                                                                             | 2000 | 3C |
| R. M. Allison, T.; Hewson, G.; Snider, W.; Dougherty,<br>D.                                                                                                                | 2001 | 3C |
| A. B. B. Bong, B.; Franke, I.; Schon, M.; Ulrich, J.;<br>Gollnick, H.                                                                                                      | 2002 | 3C |
| I. H. S. Wolf, J.; Binder, B.; Cerroni, L.; Richtig, E.;<br>Kerl, H.                                                                                                       | 2003 | 3C |
| E. M. Paul, I.; Renner, H.; Bodeker, R. H.; Cochran,<br>A. J.                                                                                                              | 2003 | 3C |
| E. M. Paul, I.; Renner, H.; Bodeker, R. H.; Cochran,<br>A. J.                                                                                                              | 2003 | 3C |
| E. H. Richtig, M.; Rehak, P.; Kapp, K.; Hofman-<br>Wellenhof, R.; Zalaudek, I.; Poschauko, J.;<br>Uggowitzner, M.; Kohek, P.; Smolle, J.                                   | 2003 | 3C |
| R. E. A. Cuenca, R. R.; Sibata, C.; Downie, G. H.                                                                                                                          | 2004 | 3C |
| M. C. Rebersek, T.; Cemazar, M.; Kranjc, S.; Sersa, G.                                                                                                                     | 2004 | 3C |
| M. C. Rebersek, T.; Cemazar, M.; Kranjc, S.; Sersa, G.                                                                                                                     | 2004 | 3C |
| E. D. Copcu, E.; Sivrioglu, N.; Meteoglu, I.                                                                                                                               | 2004 | 3C |
| E. D. Copcu, E.; Sivrioglu, N.; Meteoglu, I.                                                                                                                               | 2004 | 3C |
| S. V. Z. Sheleg, E. A.; Khodina, T. V.; Kochubeev, G.<br>A.; Istomin, Y. P.; Chalov, V. N.; Zhuravkin, I. N.                                                               | 2004 | 3C |
| D. M. Dequanter, F. B.; Lothaire, P.; Andry, G.                                                                                                                            | 2005 | 3C |
| D. M. Dequanter, F. B.; Lothaire, P.; Andry, G.                                                                                                                            | 2005 | 3C |
| P. K. Terheyden, A. K.; Schulze, H. J.; Durani, B.;<br>Remling, R.; Mauch, C.; Junghans, V.; Schadendorf,<br>D.; Beiteke, U.; Junger, M.; Becker, J. C.; Brocker, E.<br>B. | 2007 | 3C |
| L. G. M. Campana, S.; Basso, M.; Puccetti, O.; De<br>Salvo, G. L.; Chiarion-Sileni, V.; Vecchiato, A.; Corti,<br>L.; Rossi, C. R.; Nitti, D.                               | 2009 | 3B |
| T. O. Fujimura, R.; Ohtani, T.; Ito, Y.; Haga, T.;<br>Hashimoto, A.; Aiba, S.                                                                                              | 2009 | 3C |
| D. L. S. Damian, K. F.; Saw, R. P.; Thompson, J. F.                                                                                                                        | 2009 | 3C |
| M. C. B. Foote, B. H.; Thomas, J.; Mark Smithers, B.                                                                                                                       | 2010 | 3C |
| L. A. W. Kottschade, R. H.; Otley, C. C.; McWilliams,<br>R. R.; Markovic, S. N.                                                                                            | 2010 | 3C |
| M. S. O. Garcia, Y.; Martinez, S. R.; Chen, S. L.;<br>Goodarzi, H.; Phan, T.; Wehrli, L. N.; Miyamura, Y.;<br>Fung, M. A.; Maverakis, E.                                   | 2011 | 3C |
| M. S. O. Garcia, Y.; Martinez, S. R.; Chen, S. L.;<br>Goodarzi, H.; Phan, T.; Wehrli, L. N.; Miyamura, Y.;<br>Fung, M. A.; Maverakis, E.                                   | 2011 | 3C |
| E. O. Kis, J.; Ocsai, H.; Baltas, E.; Gyulai, R.; Kemeny,<br>L.; Horvath, A. R.                                                                                            | 2011 | 3C |
| M. S. Bourke, S.; Sadadcharam, M.; Larkin, J.; Soden,<br>D.; Sullivan, G. O.                                                                                               | 2011 | 3C |
| M. K. Shukla, V.; Pandey, M.                                                                                                                                               | 2012 | 3C |

|                                                                                                                             |      |    |
|-----------------------------------------------------------------------------------------------------------------------------|------|----|
| <b>O. K. Borgul, M. A.</b>                                                                                                  | 2012 | 3C |
| <b>E. P. W. Salerno, E.; Marincola, F.; Slingluff, C. L.</b>                                                                | 2012 | 3C |
| <b>D. Damian</b>                                                                                                            | 2013 | 3C |
| <b>N. S. Clayton, A.; Boyce, M.; Wolstenholme, V.;<br/>Harwood, C.; Moir, G.; McGregor, J. M.; Cerio, R.</b>                | 2013 | 3C |
| <b>L. C. Garibyan, S. E.; Hansen, J. L.; Noell, C.;<br/>Dorosario, A.; O'Farrell, D. A.; Devlin, P. M.; Wang,<br/>L. C.</b> | 2013 | 3C |
| <b>H. V. Godoy, P.; Cooper, M.; Frederick, P. J.; Odunsi,<br/>K.; Lele, S.</b>                                              | 2013 | 3C |
